# Supplementary material
Source: publisher site journal article supplement (https://www.spandidos-publications.com/4466/downloadSupplementary)
Supplement: Supplementary file 1 [file downloadSupplementary]

## Sheet: Table S1
Table SI. All TRA recoveries from all TCGA-BRCA primary tumor exome files.
Filename	Sample Type	Read ID	VID	V Match	V Match Percent	V Match Length	JID	J Match	J Match Percent	J Match Length	CDR3	Receptor
TCGA-A8-A09T	Primary Tumor	HWUSI-EAS1554_104454516:4:35:17702:9464	M21624|TRAV14/DV4*03|Homo	19/21 nt	90.4762	19	M94081|TRAJ43*01|Homo	54/54 nt	100	54	CDNNNDMRF	TRA
TCGA-A2-A0CU	Primary Tumor	HWI-EAS231_105941067:3:13:19603:16034	M27371|TRAV26-1*02|Homo	32/32 nt	100	32	M94081|TRAJ56*01|Homo	58/58 nt	100	58	CIVTTGANSKLTF	TRA
TCGA-A2-A0CU	Primary Tumor	HWI-EAS231_105941067:4:55:7530:4163	AE000660|TRAV30*01|Homo	22/22 nt	100	22	M94081|TRAJ30*01|Homo	54/54 nt	100	54	CGTDRDDKIIF	TRA
TCGA-AR-A0TY	Primary Tumor	HWI-ST466_112538257:6:1105:15114:169325	M95394|TRAV38-1*03|Homo	57/57 nt	100	57	AJ007774|TRAJ37*02|Homo	39/39 nt	100	39	CISVLSRSSNTGKLIF	TRA
TCGA-AR-A0TY	Primary Tumor	HWI-ST466_112538257:6:1105:15533:60372	AE000659|TRAV13-1*01|Homo	32/32 nt	100	32	M94081|TRAJ39*01|Homo	51/52 nt	98.0769	51	CAATGRAGNMLTF	TRA
TCGA-AR-A0TY	Primary Tumor	HWI-ST466_112538257:6:2107:2844:26751	AE000659|TRAV8-3*01|Homo	27/27 nt	100	27	M94081|TRAJ29*01|Homo	57/57 nt	100	57	CAVGAVDSGNTPLVF	TRA
TCGA-OL-A5RW	Primary Tumor	HWI-ST467:139314245:C24PVACXX:7:1204:19826:80283	AE000660|TRAV26-1*01|Homo	40/40 nt	100	40	X05773|TRAJ17*01|Homo	55/55 nt	100	55	CCVLLHRQSRGAAGNKLTF	TRA
TCGA-D8-A1X7	Primary Tumor	HWI-ST482_114177089:1:2206:14274:125329	S81645|TRAV29/DV5*02|Homo	35/35 nt	100	35	M35620|TRAJ40*01|Homo	59/59 nt	100	59	CAASHTSGTYKYIF	TRA
TCGA-B6-A0IC	Primary Tumor	HWUSI-EAS677_106003799:7:110:15322:15847	AE000659|TRAV5*01|Homo	22/22 nt	100	22	AJ007774|TRAJ37*02|Homo	61/61 nt	100	61	CAESIKGSSNTGKLIF	TRA
TCGA-OL-A5S0	Primary Tumor	HWI-ST791:138827774:D21W4ACXX:2:1308:11211:63144	AE000659|TRAV9-2*01|Homo	73/73 nt	100	73	X05775|TRAJ15*01|Homo	28/28 nt	100	28	CALNQAGTALIF	TRA
TCGA-A2-A04W	Primary Tumor	HWI-EAS319_110007469:5:51:4259:7614	M17657|TRAV12-1*02|Homo	73/73 nt	100	73	M94081|TRAJ53*01|Homo	22/22 nt	100	22	CVVIGGGSNYKLTF	TRA
TCGA-A2-A04W	Primary Tumor	HWI-EAS319_110007469:5:83:11279:10805	AE000660|TRAV17*01|Homo	52/52 nt	100	52	M94081|TRAJ56*01|Homo	47/47 nt	100	47	CAYTGANSKLTF	TRA
TCGA-A2-A04W	Primary Tumor	HWI-EAS319_110007469:5:11:13876:4526	AE000661|TRAV38-2/DV8*01|Homo	51/51 nt	100	51	M94081|TRAJ43*01|Homo	46/46 nt	100	46	CAYRSPNNNDMRF	TRA
TCGA-A2-A04W	Primary Tumor	HWI-EAS319_110007469:5:7:5077:7997	AE000661|TRAV41*01|Homo	37/37 nt	100	37	M94081|TRAJ54*01|Homo	53/53 nt	100	53	CAALRDQGAQKLVF	TRA
TCGA-A2-A04W	Primary Tumor	HWI-EAS319_110007469:6:4:11016:13836	AE000660|TRAV29/DV5*01|Homo	31/31 nt	100	31	M94081|TRAJ26*01|Homo	55/55 nt	100	55	CAASKREGNYGQNFVF	TRA
TCGA-A2-A04W	Primary Tumor	HWI-EAS319_110007469:5:30:9417:13482	AE000658|TRAV4*01|Homo	32/32 nt	100	32	M94081|TRAJ10*01|Homo	60/60 nt	100	60	CTTASWVTGFTGGGNKLTF	TRA
TCGA-A8-A092	Primary Tumor	HWUSI-EAS635_104448450:4:101:1124:9785	M17657|TRAV12-1*02|Homo	58/60 nt	96.6667	58	M94081|TRAJ33*01|Homo	38/38 nt	100	38	CVVVNYQLIW	TRA
TCGA-A8-A092	Primary Tumor	HWUSI-EAS635_104448450:4:71:16549:9954	AE000659|TRAV9-2*01|Homo	38/38 nt	100	38	M94081|TRAJ27*01|Homo	57/57 nt	100	57	CQTQRCTSVLPYNTNAGKSTF	TRA
TCGA-A8-A092	Primary Tumor	HWUSI-EAS635_104448450:5:28:13748:4249	AE000658|TRAV4*01|Homo	37/37 nt	100	37	X02885|TRAJ12*01|Homo	53/54 nt	98.1481	53	CCVLLPRGGDSSYKLIF	TRA
TCGA-A7-A26F	Primary Tumor	HWI-ST514_126388021:5:1313:8417:15788	AE000659|TRAV8-3*01|Homo	61/61 nt	100	61	M94081|TRAJ8*01|Homo	28/28 nt	100	28	CAVAPGRGFQKLVF	TRA
TCGA-A7-A26F	Primary Tumor	HWI-ST514_126388021:5:1212:2565:21402	AE000660|TRAV35*01|Homo	54/54 nt	100	54	M35622|TRAJ34*01|Homo	44/44 nt	100	44	CAGQVYNTDKLIF	TRA
TCGA-BH-A0BD	Primary Tumor	HWUSI-EAS574_105972462:2:19:1783:6764	AE000658|TRAV2*01|Homo	66/67 nt	98.5075	66	X05775|TRAJ15*01|Homo	25/25 nt	100	25	CALVRQAGTALIF	TRA
TCGA-BH-A0BD	Primary Tumor	HWUSI-EAS574_105972462:2:41:5444:12839	AE000658|TRAV2*01|Homo	68/68 nt	100	68	M14905|TRAJ31*01|Homo	30/30 nt	100	30	CCCLLLCCGNARLMF	TRA
TCGA-BH-A0BD	Primary Tumor	HWUSI-EAS574_105972462:2:116:6983:5933	AE000660|TRAV30*01|Homo	59/59 nt	100	59	AJ007774|TRAJ37*02|Homo	34/34 nt	100	34	CGTEIRGSNTGKLIF	TRA
TCGA-BH-A0BD	Primary Tumor	HWUSI-EAS574_105972462:1:42:9660:11285	AE000661|TRAV41*01|Homo	73/73 nt	100	73	M94081|TRAJ58*01|Homo	23/23 nt	100	23	CAVRETSGSRLTF	TRA
TCGA-BH-A0BD	Primary Tumor	HWUSI-EAS574_105972462:2:41:11126:13290	AE000661|TRAV41*01|Homo	69/69 nt	100	69	M94081|TRAJ58*01|Homo	27/27 nt	100	27	CAVRETSGSRLTF	TRA
TCGA-BH-A0BD	Primary Tumor	HWUSI-EAS574_105972462:2:24:13866:7754	AE000661|TRAV41*01|Homo	69/69 nt	100	69	M94081|TRAJ58*01|Homo	27/27 nt	100	27	CAVRETSGSRLTF	TRA
TCGA-BH-A0BD	Primary Tumor	HWUSI-EAS574_105972462:2:31:2995:12347	AE000661|TRAV41*01|Homo	67/67 nt	100	67	M94081|TRAJ58*01|Homo	29/29 nt	100	29	CAVRETSGSRLTF	TRA
TCGA-BH-A0BD	Primary Tumor	HWUSI-EAS574_105972462:2:87:19423:12733	AE000661|TRAV41*01|Homo	57/57 nt	100	57	M94081|TRAJ58*01|Homo	39/39 nt	100	39	CAVRETSGSRLTF	TRA
TCGA-BH-A0BD	Primary Tumor	HWUSI-EAS574_105972462:2:64:17207:19204	AE000661|TRAV41*01|Homo	50/50 nt	100	50	M94081|TRAJ58*01|Homo	46/46 nt	100	46	CAVRETSGSRLTF	TRA
TCGA-BH-A0BD	Primary Tumor	HWUSI-EAS574_105972462:2:2:17929:1686	AE000661|TRAV41*01|Homo	21/21 nt	100	21	M94081|TRAJ58*01|Homo	55/55 nt	100	55	CAVRETSGSRLTF	TRA
TCGA-BH-A0BD	Primary Tumor	HWUSI-EAS574_105972462:1:68:9332:7300	AE000661|TRAV41*01|Homo	46/46 nt	100	46	M94081|TRAJ58*01|Homo	50/50 nt	100	50	CAVRETSGSRLTF	TRA
TCGA-BH-A0BD	Primary Tumor	HWUSI-EAS574_105972462:1:55:6330:16000	AE000661|TRAV41*01|Homo	37/37 nt	100	37	M94081|TRAJ58*01|Homo	55/55 nt	100	55	CAVRETSGSRLTF	TRA
TCGA-BH-A0BD	Primary Tumor	HWUSI-EAS574_105972462:1:60:17101:11448	AE000661|TRAV41*01|Homo	32/32 nt	100	32	M94081|TRAJ58*01|Homo	55/55 nt	100	55	CAVRETSGSRLTF	TRA
TCGA-BH-A0BD	Primary Tumor	HWUSI-EAS574_105972462:1:25:12267:14858	AE000661|TRAV41*01|Homo	41/41 nt	100	41	M94081|TRAJ58*01|Homo	55/55 nt	100	55	CAVRETSGSRLTF	TRA
TCGA-BH-A0BD	Primary Tumor	HWUSI-EAS574_105972462:2:14:7282:2190	AE000659|TRAV16*01|Homo	22/23 nt	95.6522	22	M94081|TRAJ49*01|Homo	47/47 nt	100	47	CARGVNQFYF	TRA
TCGA-BH-A0BD	Primary Tumor	HWUSI-EAS574_105972462:1:58:13754:19875	AE000659|TRAV10*01|Homo	28/29 nt	96.5517	28	M94081|TRAJ26*01|Homo	58/58 nt	100	58	CVVIDNYGQNFVF	TRA
TCGA-A2-A0YC	Primary Tumor	HWUSI-EAS710_108250660:1:109:16766:17917	M35617|TRAV8-3*02|Homo	56/56 nt	100	56	X58763|TRAJ23*02|Homo	35/35 nt	100	35	CAGTFVYNQGGKLIF	TRA
TCGA-A2-A0YC	Primary Tumor	HWUSI-EAS710_108250660:2:57:9043:4280	M81774|TRAV12-2*02|Homo	39/39 nt	100	39	M94081|TRAJ10*01|Homo	57/58 nt	98.2759	57	CAVRRGGNKLTF	TRA
TCGA-BH-A0BF	Primary Tumor	HWI-EAS231_110064842:1:15:13239:13377	AE000658|TRAV1-2*01|Homo	66/66 nt	100	66	M14905|TRAJ31*01|Homo	28/28 nt	100	28	CAVRDRGNNARLMF	TRA
TCGA-BH-A0BF	Primary Tumor	HWI-EAS231_110064842:1:119:9009:10197	AE000658|TRAV1-2*01|Homo	54/54 nt	100	54	M94081|TRAJ4*01|Homo	33/33 nt	100	33	CAVRDLTPVSGGYNKLIF	TRA
TCGA-BH-A0BF	Primary Tumor	HWI-EAS231_110064842:1:14:6536:6791	AE000658|TRAV1-2*01|Homo	53/54 nt	98.1481	53	M94081|TRAJ4*01|Homo	31/32 nt	96.875	31	CALRDLTPVSVGYNKLIF	TRA
TCGA-BH-A0BF	Primary Tumor	HWI-EAS231_110064842:1:14:6544:6816	AE000658|TRAV1-2*01|Homo	53/55 nt	96.3636	53	M94081|TRAJ4*01|Homo	31/32 nt	96.875	31	CAWRDLTPVSVGYNKLIF	TRA
TCGA-BH-A0BF	Primary Tumor	HWI-EAS231_110064842:1:35:19084:14225	AE000658|TRAV1-2*01|Homo	54/54 nt	100	54	M94081|TRAJ4*01|Homo	33/33 nt	100	33	CAVRDLTPVSGGYNKLIF	TRA
TCGA-BH-A0BF	Primary Tumor	HWI-EAS231_110064842:1:97:4208:10427	AE000658|TRAV1-2*01|Homo	54/54 nt	100	54	M94081|TRAJ4*01|Homo	33/33 nt	100	33	CAVRDLTPVSGGYNKLIF	TRA
TCGA-BH-A0BF	Primary Tumor	HWI-EAS231_110064842:2:65:14455:19932	AE000658|TRAV1-2*01|Homo	54/54 nt	100	54	M94081|TRAJ4*01|Homo	33/33 nt	100	33	CAVRDLTPVSGGYNKLIF	TRA
TCGA-BH-A0BF	Primary Tumor	HWI-EAS231_110064842:2:78:12029:1428	AE000660|TRAV19*01|Homo	58/58 nt	100	58	AF532854|TRAJ32*02|Homo	40/40 nt	100	40	CALSEADGGATNKLIF	TRA
TCGA-BH-A0BF	Primary Tumor	HWI-EAS231_110064842:1:74:7862:18810	M97704|TRAV23/DV6*03|Homo	67/67 nt	100	67	X05773|TRAJ17*01|Homo	26/26 nt	100	26	CKAAGNKLTF	TRA
TCGA-BH-A0BF	Primary Tumor	HWI-EAS231_110064842:1:67:11246:3412	M97704|TRAV23/DV6*03|Homo	67/67 nt	100	67	X05773|TRAJ17*01|Homo	26/26 nt	100	26	CKAAGNKLTF	TRA
TCGA-BH-A0BF	Primary Tumor	HWI-EAS231_110064842:2:3:11823:8012	X73521|TRAV40*01|Homo	57/58 nt	98.2759	57	M94081|TRAJ48*01|Homo	36/36 nt	100	36	CLLPSFGNEKLTF	TRA
TCGA-BH-A0BF	Primary Tumor	HWI-EAS231_110064842:1:31:16444:8344	AE000660|TRAV26-2*01|Homo	37/37 nt	100	37	M94081|TRAJ50*01|Homo	56/56 nt	100	56	CILRGGVTSYDKVIF	TRA
TCGA-BH-A0BF	Primary Tumor	HWI-EAS231_110064842:1:108:5563:2775	AE000658|TRAV2*01|Homo	43/43 nt	100	43	M94081|TRAJ48*01|Homo	53/53 nt	100	53	CCCLLLCCVGGNEKLTF	TRA
TCGA-BH-A0BF	Primary Tumor	HWI-EAS231_110064842:2:54:4465:17687	M27371|TRAV26-1*02|Homo	36/36 nt	100	36	M14905|TRAJ31*01|Homo	51/51 nt	100	51	CCVLLHRRDNARLMF	TRA
TCGA-BH-A0BF	Primary Tumor	HWI-EAS231_110064842:1:59:10873:17596	AE000658|TRAV2*01|Homo	36/37 nt	97.2973	36	M94081|TRAJ29*01|Homo	57/57 nt	100	57	CCCLLLCWGFYSGNTPLVF	TRA
TCGA-BH-A0BF	Primary Tumor	HWI-EAS231_110064842:1:52:9937:10933	M95394|TRAV38-1*03|Homo	28/28 nt	100	28	M94081|TRAJ24*02|Homo	62/63 nt	98.4127	62	CDVFLCFRYMTTDSWGKWQF	TRA
TCGA-BH-A0BF	Primary Tumor	HWI-EAS231_110064842:1:78:5940:11719	AE000658|TRAV3*01|Homo	31/31 nt	100	31	X05773|TRAJ17*01|Homo	60/60 nt	100	60	CAVRDAVKAAGNKLTF	TRA
TCGA-BH-A0BF	Primary Tumor	HWI-EAS231_110064842:1:1:18029:4732	AE000658|TRAV3*01|Homo	31/31 nt	100	31	X05773|TRAJ17*01|Homo	60/60 nt	100	60	CAVRDAVKAAGNKLTF	TRA
TCGA-BH-A0BF	Primary Tumor	HWI-EAS231_110064842:2:13:7464:6924	M35617|TRAV8-3*02|Homo	31/31 nt	100	31	M94081|TRAJ10*01|Homo	56/56 nt	100	56	CAVAGGGGGNKLTF	TRA
TCGA-EW-A1P7	Primary Tumor	HWI-ST514_114051246:8:2207:5858:75738	AE000658|TRAV3*01|Homo	52/52 nt	100	52	M35620|TRAJ40*01|Homo	41/41 nt	100	41	CCERRAEGTYKYIF	TRA
TCGA-EW-A1P7	Primary Tumor	HWI-ST514_114051246:8:1207:7550:39445	AE000658|TRAV3*01|Homo	50/50 nt	100	50	M35620|TRAJ40*01|Homo	41/41 nt	100	41	CCERRAEGTYKYIF	TRA
TCGA-EW-A1P7	Primary Tumor	HWI-ST514_114051246:8:1203:13964:103407	AE000658|TRAV3*01|Homo	52/52 nt	100	52	M35620|TRAJ40*01|Homo	41/41 nt	100	41	CCERRAEGTYKYIF	TRA
TCGA-EW-A1P7	Primary Tumor	HWI-ST514_114051246:7:2207:8935:82036	AE000658|TRAV3*01|Homo	52/52 nt	100	52	M35620|TRAJ40*01|Homo	41/41 nt	100	41	CCERRAEGTYKYIF	TRA
TCGA-EW-A1P7	Primary Tumor	HWI-ST514_114051246:7:2103:9995:125182	AE000658|TRAV3*01|Homo	52/52 nt	100	52	M35620|TRAJ40*01|Homo	41/41 nt	100	41	CCERRAEGTYKYIF	TRA
TCGA-EW-A1P7	Primary Tumor	HWI-ST514_114051246:7:1204:13536:126160	AE000658|TRAV3*01|Homo	52/52 nt	100	52	M35620|TRAJ40*01|Homo	41/41 nt	100	41	CCERRAEGTYKYIF	TRA
TCGA-EW-A1P7	Primary Tumor	HWI-ST514_114051246:7:2207:19495:108529	AE000660|TRAV29/DV5*01|Homo	74/74 nt	100	74	M94081|TRAJ11*01|Homo	22/22 nt	100	22	CAASEGNSGYSTLTF	TRA
TCGA-EW-A1P7	Primary Tumor	HWI-ST514_114051246:7:2101:12514:40634	AE000660|TRAV29/DV5*01|Homo	64/65 nt	98.4615	64	M94081|TRAJ30*01|Homo	26/26 nt	100	26	CAAKLLGGDDKIIF	TRA
TCGA-EW-A1P7	Primary Tumor	HWI-ST514_114051246:7:2104:19136:69819	AE000659|TRAV14/DV4*02|Homo	46/46 nt	100	46	M35619|TRAJ44*01|Homo	55/56 nt	98.2143	55	CAMRKPALPVNSP	TRA
TCGA-EW-A1P7	Primary Tumor	HWI-ST514_114051246:7:2204:9068:197299	AE000659|TRAV14/DV4*02|Homo	46/46 nt	100	46	M35619|TRAJ44*01|Homo	55/56 nt	98.2143	55	CAMRKPALPVNSP	TRA
TCGA-EW-A1P7	Primary Tumor	HWI-ST514_114051246:7:1102:8194:192143	M27371|TRAV26-1*02|Homo	23/23 nt	100	23	M94081|TRAJ39*01|Homo	59/59 nt	100	59	CVLLHRQTTSNNAGNMLTF	TRA
TCGA-EW-A1P7	Primary Tumor	HWI-ST514_114051246:8:1206:14892:145149	M27371|TRAV26-1*02|Homo	23/23 nt	100	23	M94081|TRAJ39*01|Homo	59/59 nt	100	59	CVLLHRQTTSNNAGNMLTF	TRA
TCGA-EW-A1P7	Primary Tumor	HWI-ST514_114051246:8:1208:6207:12051	AE000658|TRAV4*01|Homo	22/23 nt	95.6522	22	M94081|TRAJ27*01|Homo	53/53 nt	100	53	CTTASWVSNAGKSTF	TRA
TCGA-BH-A6R9	Primary Tumor	HWI-ST485:143300654:C2MNAACXX:6:1116:6421:8897	AE000659|TRAV8-3*01|Homo	49/49 nt	100	49	M94081|TRAJ53*01|Homo	47/47 nt	100	47	CAVGAGSGGSNYKLTF	TRA
TCGA-BH-A6R9	Primary Tumor	HWI-ST485:143300654:C2MNAACXX:6:2315:19618:56338	S81645|TRAV29/DV5*02|Homo	45/45 nt	100	45	M94081|TRAJ57*01|Homo	52/52 nt	100	52	CSVLLCSKQEGGSEKLVF	TRA
TCGA-BH-A6R9	Primary Tumor	HWI-ST485:143300654:C2MNAACXX:5:1314:2550:63324	AE000660|TRAV35*01|Homo	34/34 nt	100	34	M94081|TRAJ48*01|Homo	54/54 nt	100	54	CAGQLGNEKLTF	TRA
TCGA-D8-A1XB	Primary Tumor	HWI-ST791_114212154:4:1106:18976:198738	AE000658|TRAV1-2*01|Homo	39/39 nt	100	39	M94081|TRAJ20*01|Homo	55/55 nt	100	55	CAVRALRSNDYKLSF	TRA
TCGA-D8-A1XB	Primary Tumor	HWI-ST791_114212154:5:1103:9072:50766	AE000658|TRAV1-2*01|Homo	39/39 nt	100	39	M94081|TRAJ20*01|Homo	55/55 nt	100	55	CAVRALRSNDYKLSF	TRA
TCGA-D8-A1XB	Primary Tumor	HWI-ST791_114212154:5:2201:8424:30136	AE000658|TRAV1-2*01|Homo	39/39 nt	100	39	M94081|TRAJ20*01|Homo	55/55 nt	100	55	CAVRALRSNDYKLSF	TRA
TCGA-BH-A0BC	Primary Tumor	HWUSI-EAS712_107615007:5:31:6505:10429	AE000659|TRAV8-2*01|Homo	60/60 nt	100	60	M94081|TRAJ42*01|Homo	34/34 nt	100	34	CVVSETVGSQGNLIF	TRA
TCGA-BH-A0BC	Primary Tumor	HWUSI-EAS712_107615007:5:44:17934:15906	M12959|TRAV8-4*04|Homo	60/60 nt	100	60	M94081|TRAJ9*01|Homo	39/39 nt	100	39	CAVSGTGGFKTIF	TRA
TCGA-A1-A0SE	Primary Tumor	HWUSI-EAS776_106362792:1:75:9482:19300#0	AE000658|TRAV1-2*01|Homo	30/30 nt	100	30	M94081|TRAJ33*01|Homo	57/57 nt	100	57	CAVSALDSNYQLIW	TRA
TCGA-EW-A1J5	Primary Tumor	HWI-ST495_114207684:8:1107:13928:94285	M81774|TRAV12-2*02|Homo	33/33 nt	100	33	M94081|TRAJ45*01|Homo	54/54 nt	100	54	CRLSPTMYSGGGADGLTF	TRA
TCGA-EW-A1J5	Primary Tumor	HWI-ST495_114207684:7:2106:10485:28799	M17656|TRAV12-3*02|Homo	28/28 nt	100	28	AF532854|TRAJ32*02|Homo	58/58 nt	100	58	CAPQGGATNKLIF	TRA
TCGA-EW-A1J5	Primary Tumor	HWI-ST495_114207684:7:1204:19259:125085	M17656|TRAV12-3*02|Homo	28/28 nt	100	28	AF532854|TRAJ32*02|Homo	58/58 nt	100	58	CAPQGGATNKLIF	TRA
TCGA-EW-A1J5	Primary Tumor	HWI-ST495_114207684:6:1205:15830:80828	AE000658|TRAV1-2*01|Homo	34/34 nt	100	34	M94081|TRAJ10*01|Homo	60/60 nt	100	60	CAVRDRITGGGNKLTF	TRA
TCGA-EW-A1J5	Primary Tumor	HWI-ST495_114207684:7:2104:20811:118248	AE000658|TRAV1-2*01|Homo	34/34 nt	100	34	M94081|TRAJ10*01|Homo	60/60 nt	100	60	CAVRDRITGGGNKLTF	TRA
TCGA-A1-A0SG	Primary Tumor	HWI-ST648_115345859:4:2304:21015:141216	AE000660|TRAV20*01|Homo	80/86 nt	93.0233	80	M94081|TRAJ37*01|Homo	19/20 nt	95	19	CAVLVSGNTGKLIF	TRA
TCGA-A1-A0SG	Primary Tumor	HWI-ST474_116588994:1:2207:11791:157348	M17657|TRAV12-1*02|Homo	24/24 nt	100	24	X02884|TRAJ3*01|Homo	60/61 nt	98.3607	60	CVVNKGNSSASKIIF	TRA
TCGA-A1-A0SG	Primary Tumor	HWI-ST648_115345859:4:2206:8053:130863	M17657|TRAV12-1*02|Homo	21/21 nt	100	21	X02884|TRAJ3*01|Homo	60/61 nt	98.3607	60	CVVNKGNSSASKIIF	TRA
TCGA-AN-A0FK	Primary Tumor	ILLUMINA-63A70C_105350422:3:97:9725:9955	AE000660|TRAV19*01|Homo	54/54 nt	100	54	M94081|TRAJ28*01|Homo	39/39 nt	100	39	CALPYYSGAGSYQLTF	TRA
TCGA-AN-A0FK	Primary Tumor	ILLUMINA-63A70C_105350422:4:36:18934:12954	AE000660|TRAV22*01|Homo	64/64 nt	100	64	M94081|TRAJ26*01|Homo	23/23 nt	100	23	CFPQRGYGQNFVF	TRA
TCGA-AN-A0FK	Primary Tumor	ILLUMINA-63A70C_105350422:4:28:5304:1656	M21626|TRAV14/DV4*01|Homo	37/37 nt	100	37	M94081|TRAJ45*01|Homo	58/58 nt	100	58	CAMREVPSGGGADGLTF	TRA
TCGA-AN-A0FK	Primary Tumor	ILLUMINA-63A70C_105350422:4:28:3112:15230	AE000660|TRAV19*01|Homo	28/28 nt	100	28	M94081|TRAJ29*01|Homo	54/54 nt	100	54	CALKPGNTPLVF	TRA
TCGA-AN-A0FK	Primary Tumor	ILLUMINA-63A70C_105350422:3:58:4169:6954	AE000659|TRAV16*01|Homo	37/37 nt	100	37	X02885|TRAJ12*01|Homo	58/58 nt	100	58	CITVLGRMDSSYKLIF	TRA
TCGA-A2-A0CQ	Primary Tumor	HWUSI-EAS712_105934507:6:40:16929:17684	AE000660|TRAV17*01|Homo	55/55 nt	100	55	M94081|TRAJ37*01|Homo	43/43 nt	100	43	CATFSGNTGKLIF	TRA
TCGA-A8-A09Q	Primary Tumor	HWUSI-EAS1554_104454516:7:90:6698:5627	AE000658|TRAV2*01|Homo	68/69 nt	98.5507	68	M94081|TRAJ26*01|Homo	26/26 nt	100	26	CGRQMLLFTTVLSDNYGQNFVF	TRA
TCGA-A8-A09Q	Primary Tumor	HWI-EAS110_105969435:6:92:6738:2883	M35617|TRAV8-3*02|Homo	51/51 nt	100	51	M94081|TRAJ7*01|Homo	38/38 nt	100	38	CAVVPGVYYGNNRLAF	TRA
TCGA-A8-A09Q	Primary Tumor	HWI-EAS110_105969435:6:1:16092:16090	AE000659|TRAV13-1*01|Homo	52/52 nt	100	52	X05773|TRAJ17*01|Homo	43/43 nt	100	43	CLLLCSKYGQAAGNKLTF	TRA
TCGA-A8-A09Q	Primary Tumor	HWI-EAS110_105969435:6:34:4485:6502	AE000659|TRAV8-6*02|Homo	31/31 nt	100	31	M94081|TRAJ10*01|Homo	61/61 nt	100	61	CAVSLTGGGNKLTF	TRA
TCGA-A8-A09Q	Primary Tumor	HWI-EAS110_105969435:6:17:10890:17083	AE000658|TRAV3*01|Homo	26/26 nt	100	26	M94081|TRAJ9*01|Homo	57/57 nt	100	57	CAVRDYTGGFKTIF	TRA
TCGA-D8-A1JL	Primary Tumor	HWI-ST664_114750549:2:1202:16055:90363	AE000658|TRAV1-2*01|Homo	61/61 nt	100	61	M94081|TRAJ30*01|Homo	35/35 nt	100	35	CLLPLCCERGRDDKIIF	TRA
TCGA-D8-A1JL	Primary Tumor	HWI-ST495_114207684:1:1208:8746:141627	AE000659|TRAV12-2*01|Homo	76/76 nt	100	76	X05773|TRAJ17*01|Homo	27/30 nt	90	27	CAVNRAAGNKLSF	TRA
TCGA-D8-A1JL	Primary Tumor	HWI-ST495_114207684:1:2104:6929:10536	AE000659|TRAV12-2*01|Homo	76/76 nt	100	76	X05773|TRAJ17*01|Homo	28/30 nt	93.3333	28	CAVNRAAGNKLTF	TRA
TCGA-D8-A1JL	Primary Tumor	HWI-ST664_114750549:2:1203:14658:166415	M21626|TRAV14/DV4*01|Homo	62/62 nt	100	62	M94081|TRAJ33*01|Homo	36/36 nt	100	36	CAMRERDSNYQLIW	TRA
TCGA-D8-A1JL	Primary Tumor	HWI-ST495_114207684:2:2203:4296:46772	AE000659|TRAV8-6*02|Homo	53/53 nt	100	53	M94081|TRAJ49*01|Homo	45/45 nt	100	45	CAVSESGNQFYF	TRA
TCGA-D8-A1JL	Primary Tumor	HWI-ST495_114207684:1:1108:2512:162496	AE000661|TRAV39*01|Homo	49/49 nt	100	49	M35622|TRAJ34*01|Homo	44/44 nt	100	44	CAVDLVDTDKLIF	TRA
TCGA-D8-A1JL	Primary Tumor	HWI-ST664_114750549:2:1102:4461:139724	AE000659|TRAV8-6*02|Homo	47/48 nt	97.9167	47	M94081|TRAJ57*01|Homo	48/49 nt	97.9592	48	CAELTQGGSEKLVF	TRA
TCGA-D8-A1JL	Primary Tumor	HWI-ST495_114207684:2:2201:14768:14024	AE000659|TRAV9-2*01|Homo	31/32 nt	96.875	31	M94081|TRAJ53*01|Homo	65/65 nt	100	65	CALSERNSGGSNYKLTF	TRA
TCGA-D8-A1JL	Primary Tumor	HWI-ST495_114207684:2:2108:14406:18741	AE000659|TRAV9-2*01|Homo	32/32 nt	100	32	M94081|TRAJ53*01|Homo	65/65 nt	100	65	CALSERNSGGSNYKLTF	TRA
TCGA-A7-A425	Primary Tumor	HWI-ST495:137338861:C1V14ACXX:1:2304:5178:97248	AE000659|TRAV9-2*01|Homo	66/67 nt	98.5075	66	M94081|TRAJ57*01|Homo	28/28 nt	100	28	CALSLLGGSEKLVF	TRA
TCGA-AR-A0TZ	Primary Tumor	HWUSI-EAS687_106288591:4:88:2862:12921	AE000658|TRAV4*01|Homo	47/48 nt	97.9167	47	X05773|TRAJ17*01|Homo	45/45 nt	100	45	CLVGDISGAAGNKLTF	TRA
TCGA-BH-A0DT	Primary Tumor	HWI-ST482_109869969:8:8:15810:61366	AE000658|TRAV4*01|Homo	77/77 nt	100	77	M94081|TRAJ30*01|Homo	22/22 nt	100	22	CCVLLPRMNRDDKIIF	TRA
TCGA-BH-A0DT	Primary Tumor	HWI-ST482_109869969:8:62:8908:131845	AE000659|TRAV8-1*01|Homo	69/69 nt	100	69	M94081|TRAJ11*01|Homo	29/29 nt	100	29	CAVNALNSGYSTLTF	TRA
TCGA-BH-A0DT	Primary Tumor	HWI-ST482_109869969:8:64:6332:74300	AE000659|TRAV12-1*01|Homo	58/58 nt	100	58	X05773|TRAJ17*01|Homo	36/36 nt	100	36	CGEHRGAAGNKLTF	TRA
TCGA-BH-A0DT	Primary Tumor	HWI-ST482_109869969:8:5:1310:190090	AE000659|TRAV14/DV4*02|Homo	64/65 nt	98.4615	64	M94081|TRAJ26*01|Homo	38/38 nt	100	38	CNEEDNYGQNFVF	TRA
TCGA-BH-A0DT	Primary Tumor	HWI-ST482_109869969:8:28:16564:116606	M17656|TRAV12-3*02|Homo	54/55 nt	98.1818	54	M94081|TRAJ26*01|Homo	42/42 nt	100	42	CIGWDNYGQNFVF	TRA
TCGA-BH-A0DT	Primary Tumor	HWI-ST482_109869969:8:46:3115:168856	AE000660|TRAV19*01|Homo	79/81 nt	97.5309	79	M14905|TRAJ31*01|Homo	19/19 nt	100	19	CSGDNARLMF	TRA
TCGA-BH-A0DT	Primary Tumor	HWI-ST482_109869969:8:28:6235:139196	AE000660|TRAV25*01|Homo	50/51 nt	98.0392	50	M35620|TRAJ40*01|Homo	38/40 nt	95	38	CAGVLETYKFVF	TRA
TCGA-BH-A0DT	Primary Tumor	HWI-ST482_109869969:8:6:15845:150910	AE000661|TRAV41*01|Homo	36/36 nt	100	36	M94081|TRAJ58*01|Homo	58/58 nt	100	58	CAVREGETSGSRLTF	TRA
TCGA-BH-A0DT	Primary Tumor	HWI-ST482_109869969:8:22:20138:102340	AE000660|TRAV19*01|Homo	41/41 nt	100	41	M94081|TRAJ50*01|Homo	52/53 nt	98.1132	52	CALSEFRTSYDKVIF	TRA
TCGA-BH-A0DT	Primary Tumor	HWI-ST482_109869969:8:2:17286:161563	AE000659|TRAV12-1*01|Homo	27/27 nt	100	27	M94081|TRAJ45*01|Homo	63/63 nt	100	63	CVVNHSGGGADGLTF	TRA
TCGA-BH-A0DT	Primary Tumor	HWI-ST482_109869969:8:48:9319:116668	M21624|TRAV14/DV4*03|Homo	20/22 nt	90.9091	20	M94081|TRAJ43*01|Homo	52/54 nt	96.2963	52	CLSMYFCDNNNDMRF	TRA
TCGA-BH-A0DT	Primary Tumor	HWI-ST482_109869969:8:23:21315:21548	AE000658|TRAV1-2*01|Homo	25/25 nt	100	25	M94081|TRAJ33*01|Homo	57/57 nt	100	57	CAIMDSNYQLIW	TRA
TCGA-BH-A0DT	Primary Tumor	HWI-ST482_109869969:8:24:11371:200450	AE000658|TRAV1-2*01|Homo	25/25 nt	100	25	M94081|TRAJ33*01|Homo	57/57 nt	100	57	CAIMDSNYQLIW	TRA
TCGA-BH-A0DT	Primary Tumor	HWI-ST482_109869969:8:5:6203:99407	AE000658|TRAV1-2*01|Homo	37/37 nt	100	37	M94081|TRAJ33*01|Homo	55/55 nt	100	55	CAVRDSNYQLIW	TRA
TCGA-BH-A0DT	Primary Tumor	HWI-ST482_109869969:8:7:12490:98956	AE000658|TRAV1-2*01|Homo	37/37 nt	100	37	M94081|TRAJ33*01|Homo	55/55 nt	100	55	CAVRDSNYQLIW	TRA
TCGA-BH-A0DT	Primary Tumor	HWI-ST482_109869969:8:25:6235:127586	Z46643|TRAV36/DV7*04|Homo	25/25 nt	100	25	M94081|TRAJ23*01|Homo	53/53 nt	100	53	CWRGSQGGKLIF	TRA
TCGA-BH-A0DT	Primary Tumor	HWI-ST482_109869969:8:22:18428:16598	Z46643|TRAV36/DV7*04|Homo	25/25 nt	100	25	M94081|TRAJ23*01|Homo	53/53 nt	100	53	CWRGSQGGKLIF	TRA
TCGA-BH-A0DT	Primary Tumor	HWI-ST482_109869969:8:66:20291:143283	AE000658|TRAV3*01|Homo	19/19 nt	100	19	X05773|TRAJ17*01|Homo	56/56 nt	100	56	CAVRAAGNKLTF	TRA
TCGA-BH-A0DT	Primary Tumor	HWI-ST482_109869969:8:27:14589:157146	AE000659|TRAV8-1*01|Homo	47/47 nt	100	47	M94081|TRAJ9*01|Homo	49/49 nt	100	49	CAVNDVGGFKTIF	TRA
TCGA-BH-A0DT	Primary Tumor	HWI-ST482_109869969:8:23:5747:8486	AE000659|TRAV6*01|Homo	38/38 nt	100	38	M94081|TRAJ5*01|Homo	54/54 nt	100	54	CRLSYLPLCSPAGRRALTF	TRA
TCGA-D8-A1JE	Primary Tumor	HWI-ST514_114051246:4:1103:18379:195664	AE000660|TRAV19*01|Homo	67/67 nt	100	67	AJ007774|TRAJ37*02|Homo	32/32 nt	100	32	CGSSNTGKLIF	TRA
TCGA-D8-A1JE	Primary Tumor	HWI-ST514_114051246:5:1204:7621:84037	AE000660|TRAV24*01|Homo	33/34 nt	97.0588	33	M94081|TRAJ38*01|Homo	60/60 nt	100	60	CASYAGNNRKLIW	TRA
TCGA-D8-A1JE	Primary Tumor	HWI-ST514_114051246:3:2108:14839:122015	AE000661|TRAV41*01|Homo	26/26 nt	100	26	M94081|TRAJ30*01|Homo	49/49 nt	100	49	CAVTVPDDKIIF	TRA
TCGA-E9-A54Y	Primary Tumor	HWI-ST466:137456800:C20VRACXX:5:1201:20549:55891	AE000660|TRAV21*01|Homo	35/35 nt	100	35	M94081|TRAJ30*01|Homo	54/54 nt	100	54	CAVEGDRDDKIIF	TRA
TCGA-E9-A54Y	Primary Tumor	HWI-ST466:137456800:C20VRACXX:6:2316:12342:73134	AE000660|TRAV21*01|Homo	35/35 nt	100	35	M94081|TRAJ30*01|Homo	54/54 nt	100	54	CAVEGDRDDKIIF	TRA
TCGA-AR-A1AP	Primary Tumor	HWI-ST485_111092036:3:2104:8201:103560	AE000659|TRAV14/DV4*02|Homo	69/69 nt	100	69	X02886|TRAJ22*01|Homo	28/28 nt	100	28	CNERGPGSARQLTF	TRA
TCGA-AR-A1AP	Primary Tumor	HWI-ST485_111092036:3:1205:1579:83152	AE000660|TRAV17*01|Homo	54/58 nt	93.1034	54	M94081|TRAJ4*01|Homo	37/37 nt	100	37	CFLLLPLGGYNKLIF	TRA
TCGA-AR-A1AP	Primary Tumor	HWI-ST485_111092036:3:2207:20333:170379	AE000661|TRAV39*01|Homo	38/38 nt	100	38	M94081|TRAJ58*01|Homo	58/59 nt	98.3051	58	CMTSLPPTSVPW	TRA
TCGA-AR-A1AP	Primary Tumor	HWI-ST485_111092036:3:1107:20221:93670	AE000659|TRAV8-1*01|Homo	42/42 nt	100	42	M94081|TRAJ41*01|Homo	53/53 nt	100	53	CRDTHSNSGYALNF	TRA
TCGA-D8-A1XW	Primary Tumor	HWI-ST482_114177089:6:1106:11504:171075	AE000658|TRAV3*01|Homo	64/64 nt	100	64	M35619|TRAJ44*01|Homo	34/34 nt	100	34	CAVSYTGTASKLTF	TRA
TCGA-D8-A1XW	Primary Tumor	HWI-ST434_114203775:4:1106:16487:66792	AE000660|TRAV27*01|Homo	39/39 nt	100	39	M35619|TRAJ44*01|Homo	60/60 nt	100	60	CAGYTGTASKLTF	TRA
TCGA-D8-A1XW	Primary Tumor	HWI-ST434_114203775:4:2202:11500:175292	AE000658|TRAV1-1*01|Homo	39/39 nt	100	39	M94081|TRAJ26*01|Homo	58/58 nt	100	58	CAVRDNYGQNFVF	TRA
TCGA-LL-A50Y	Primary Tumor	HWI-ST495:137338861:C1V14ACXX:2:1301:15927:92142	AE000660|TRAV26-2*01|Homo	62/62 nt	100	62	M94081|TRAJ20*01|Homo	31/31 nt	100	31	CILREDKSNDYKLSF	TRA
TCGA-LL-A50Y	Primary Tumor	HWI-ST495:137338861:C1V14ACXX:1:2213:13537:56442	AE000660|TRAV35*01|Homo	99/100 nt	99	99	M94081|TRAJ23*01|Homo	19/21 nt	90.4762	19	CSVWYNQEGQLIF	TRA
TCGA-LL-A50Y	Primary Tumor	HWI-ST495:137338861:C1V14ACXX:1:2315:12183:2706	AE000659|TRAV9-2*01|Homo	29/29 nt	100	29	M94081|TRAJ8*01|Homo	53/53 nt	100	53	CALSDRGGFQKLVF	TRA
TCGA-LL-A50Y	Primary Tumor	HWI-ST495:137338861:C1V14ACXX:1:2315:12183:2706	AE000659|TRAV9-2*01|Homo	25/25 nt	100	25	M94081|TRAJ8*01|Homo	53/53 nt	100	53	CALSDRGGFQKLVF	TRA
TCGA-AR-A2LM	Primary Tumor	HWI-ST718_118408391:4:1206:9770:12247	AE000658|TRAV1-2*01|Homo	66/66 nt	100	66	X02886|TRAJ22*01|Homo	31/31 nt	100	31	CAPSGSARQLTF	TRA
TCGA-AR-A2LM	Primary Tumor	HWI-ST718_118408391:4:1107:10490:122619	AE000659|TRAV5*01|Homo	48/48 nt	100	48	M94081|TRAJ43*01|Homo	44/44 nt	100	44	CAESIKGDMRF	TRA
TCGA-A2-A0EO	Primary Tumor	HWI-ST474_105915023:7:44:7347:86933	AE000659|TRAV8-3*01|Homo	69/69 nt	100	69	M35622|TRAJ34*01|Homo	24/24 nt	100	24	CAVGAQGNTDKLIF	TRA
TCGA-A2-A0EO	Primary Tumor	HWI-ST474_105915023:7:64:11230:70141	AE000659|TRAV8-3*01|Homo	55/55 nt	100	55	M35620|TRAJ40*01|Homo	40/40 nt	100	40	CAVGGPGTYKYIF	TRA
TCGA-A2-A0EO	Primary Tumor	HWI-ST474_105915023:7:43:2793:35539	AE000660|TRAV20*01|Homo	50/52 nt	96.1538	50	M94081|TRAJ29*01|Homo	39/41 nt	95.122	39	CAVPYSGNTPLVF	TRA
TCGA-A2-A0EO	Primary Tumor	HWI-ST474_105915023:7:5:7533:168450	AE000660|TRAV24*01|Homo	73/74 nt	98.6486	73	M94081|TRAJ21*01|Homo	26/26 nt	100	26	CLLYNFNKFYF	TRA
TCGA-A2-A0EO	Primary Tumor	HWI-ST474_105915023:7:27:12263:137797	AE000660|TRAV29/DV5*01|Homo	51/52 nt	98.0769	51	M94081|TRAJ42*01|Homo	43/43 nt	100	43	CASSGRGGSQGNLIF	TRA
TCGA-A2-A0EO	Primary Tumor	HWI-ST474_105915023:7:64:4019:152106	AE000660|TRAV20*01|Homo	29/29 nt	100	29	M94081|TRAJ36*01|Homo	55/55 nt	100	55	CAVQAWTGANNLFF	TRA
TCGA-A2-A0EO	Primary Tumor	HWI-ST474_105915023:7:27:20251:160359	AE000660|TRAV20*01|Homo	29/29 nt	100	29	M94081|TRAJ36*01|Homo	55/55 nt	100	55	CAVQAWTGANNLFF	TRA
TCGA-A2-A0EO	Primary Tumor	HWI-ST474_105915023:7:67:2854:96545	AE000660|TRAV21*01|Homo	41/41 nt	100	41	M94081|TRAJ10*01|Homo	56/56 nt	100	56	CAVWLTGGGNKLTF	TRA
TCGA-B6-A0WW	Primary Tumor	HWI-ST791_113338542:8:1203:1928:105950	AE000660|TRAV35*01|Homo	71/71 nt	100	71	M94081|TRAJ50*01|Homo	28/28 nt	100	28	CAGRTSYDKVIF	TRA
TCGA-B6-A0WW	Primary Tumor	HWI-ST791_113338542:8:1107:14959:81966	AE000660|TRAV19*01|Homo	45/45 nt	100	45	M94081|TRAJ45*01|Homo	49/49 nt	100	49	CALSSYSGGGADGLTF	TRA
TCGA-B6-A0WW	Primary Tumor	HWI-ST791_113338542:8:1105:1477:4283	AE000659|TRAV6*01|Homo	40/41 nt	97.561	40	M94081|TRAJ37*01|Homo	59/59 nt	100	59	CALVHGSGNTGKLIF	TRA
TCGA-B6-A0WW	Primary Tumor	HWI-ST791_113338542:8:1105:5798:38640	AE000660|TRAV19*01|Homo	24/24 nt	100	24	M94081|TRAJ37*01|Homo	61/61 nt	100	61	CALSEEGSGNTGKLIF	TRA
TCGA-B6-A0WW	Primary Tumor	HWI-ST791_113338542:8:1104:6794:87267	AE000658|TRAV1-2*01|Homo	21/21 nt	100	21	X02885|TRAJ12*01|Homo	56/56 nt	100	56	CAVVPGDSSYKLIF	TRA
TCGA-B6-A0WW	Primary Tumor	HWI-ST791_113338542:8:1203:9468:54356	M12959|TRAV8-4*04|Homo	30/30 nt	100	30	M94081|TRAJ9*01|Homo	51/51 nt	100	51	CAVSDDRGFKTIF	TRA
TCGA-D8-A27G	Primary Tumor	HWI-ST718_114371741:8:1303:12131:189823	M17656|TRAV12-3*02|Homo	59/59 nt	100	59	X05773|TRAJ17*01|Homo	40/40 nt	100	40	CAVKAAGNKLTF	TRA
TCGA-D8-A27G	Primary Tumor	HWI-ST718_114371741:8:2106:14691:186993	M27371|TRAV26-1*02|Homo	64/64 nt	100	64	M94081|TRAJ48*01|Homo	28/28 nt	100	28	CIVRLPAFGNEKLTF	TRA
TCGA-D8-A27G	Primary Tumor	HWI-ST718_114371741:8:2103:10542:74754	AE000660|TRAV26-2*01|Homo	73/73 nt	100	73	M94081|TRAJ52*01|Homo	21/21 nt	100	21	CILPLAGGTSYGKLTF	TRA
TCGA-BH-A1EW	Primary Tumor	HWI-ST467_110093165:3:3:20536:160987	AE000659|TRAV5*01|Homo	67/67 nt	100	67	M94081|TRAJ29*01|Homo	24/24 nt	100	24	CAPGLGNTPLVF	TRA
TCGA-BH-A1EW	Primary Tumor	HWI-ST467_110093165:3:41:8543:98189	AE000659|TRAV8-1*01|Homo	73/74 nt	98.6486	73	M94081|TRAJ30*01|Homo	19/19 nt	100	19	CAVSWVNRDDKIIF	TRA
TCGA-BH-A1EW	Primary Tumor	HWI-ST467_110093165:3:45:11213:120812	AE000659|TRAV13-1*01|Homo	50/50 nt	100	50	M94081|TRAJ30*01|Homo	44/44 nt	100	44	CAASVGRDDKIIF	TRA
TCGA-BH-A1EW	Primary Tumor	HWI-ST467_110093165:3:68:1871:191673	AE000659|TRAV8-4*01|Homo	52/52 nt	100	52	M94081|TRAJ4*01|Homo	44/44 nt	100	44	CAVSDPSGGYNKLIF	TRA
TCGA-BH-A1EW	Primary Tumor	HWI-ST467_110093165:3:63:5686:65509	M17656|TRAV12-3*02|Homo	56/56 nt	100	56	M94081|TRAJ10*01|Homo	40/40 nt	100	40	CAIWTGGGNKLTF	TRA
TCGA-BH-A1EW	Primary Tumor	HWI-ST467_110093165:3:28:7921:3501	AE000659|TRAV8-6*02|Homo	46/46 nt	100	46	M16747|TRAJ6*01|Homo	41/41 nt	100	41	CCEDPGWASGGSYIPTF	TRA
TCGA-BH-A1EW	Primary Tumor	HWI-ST467_110093165:3:46:7633:48264	AE000659|TRAV8-6*02|Homo	46/46 nt	100	46	M16747|TRAJ6*01|Homo	41/41 nt	100	41	CCEDPGWASGGSYIPTF	TRA
TCGA-BH-A1EW	Primary Tumor	HWI-ST467_110093165:3:3:8799:58430	AE000659|TRAV16*01|Homo	64/64 nt	100	64	M94081|TRAJ48*01|Homo	34/34 nt	100	34	CALSLNFGNEKLTF	TRA
TCGA-BH-A1EW	Primary Tumor	HWI-ST467_110093165:3:46:16379:76162	AE000660|TRAV17*01|Homo	70/70 nt	100	70	M94081|TRAJ58*01|Homo	28/29 nt	96.5517	28	CATGETSGSRLNF	TRA
TCGA-BH-A1EW	Primary Tumor	HWI-ST467_110093165:3:28:6290:195426	AE000660|TRAV17*01|Homo	69/69 nt	100	69	M16747|TRAJ6*01|Homo	26/26 nt	100	26	CATESPGGSYIPTF	TRA
TCGA-BH-A1EW	Primary Tumor	HWI-ST467_110093165:3:65:3220:154691	AE000660|TRAV26-1*01|Homo	49/49 nt	100	49	M94081|TRAJ42*01|Homo	45/45 nt	100	45	CIVRGRRGSQGNLIF	TRA
TCGA-BH-A1EW	Primary Tumor	HWI-ST467_110093165:3:48:2399:59115	AE000660|TRAV29/DV5*01|Homo	53/53 nt	100	53	M94081|TRAJ26*01|Homo	38/38 nt	100	38	CAAHVYGQNFVF	TRA
TCGA-BH-A1EW	Primary Tumor	HWI-ST467_110093165:3:63:11912:147483	AE000661|TRAV38-2/DV8*01|Homo	55/55 nt	100	55	M94081|TRAJ48*01|Homo	47/47 nt	100	47	CISVLISNFGNEKLTF	TRA
TCGA-BH-A1EW	Primary Tumor	HWI-ST467_110093165:3:28:14209:43407	AE000660|TRAV20*01|Homo	37/37 nt	100	37	M94081|TRAJ58*01|Homo	55/55 nt	100	55	CAVQPTSGSRLTF	TRA
TCGA-BH-A1EW	Primary Tumor	HWI-ST467_110093165:3:64:5983:16441	AE000660|TRAV17*01|Homo	32/32 nt	100	32	M94081|TRAJ49*01|Homo	52/52 nt	100	52	CATARTGNQFYF	TRA
TCGA-BH-A1EW	Primary Tumor	HWI-ST467_110093165:3:3:17091:71391	AE000659|TRAV6*01|Homo	46/46 nt	100	46	M94081|TRAJ48*01|Homo	47/47 nt	100	47	CSRPSESNFGNEKLTF	TRA
TCGA-BH-A1EW	Primary Tumor	HWI-ST467_110093165:3:3:17076:71376	AE000659|TRAV6*01|Homo	42/43 nt	97.6744	42	M94081|TRAJ48*01|Homo	47/47 nt	100	47	CSSPSESNFGNEKLTF	TRA
TCGA-BH-A1EW	Primary Tumor	HWI-ST467_110093165:3:22:19666:149206	AE000659|TRAV9-2*01|Homo	28/28 nt	100	28	M94081|TRAJ48*01|Homo	56/56 nt	100	56	CALSVLFGNEKLTF	TRA
TCGA-BH-A1EW	Primary Tumor	HWI-ST467_110093165:3:25:4074:49311	AE000660|TRAV22*01|Homo	38/38 nt	100	38	M94081|TRAJ43*01|Homo	47/47 nt	100	47	CAVGTNDMRF	TRA
TCGA-BH-A1EW	Primary Tumor	HWI-ST467_110093165:3:42:20079:38630	AE000659|TRAV8-3*01|Homo	43/44 nt	97.7273	43	M94081|TRAJ43*01|Homo	47/47 nt	100	47	CAVGVVGNDMRF	TRA
TCGA-BH-A1EW	Primary Tumor	HWI-ST467_110093165:3:44:6199:87257	K02777|TRAV8-4*06|Homo	24/24 nt	100	24	M35620|TRAJ40*01|Homo	59/59 nt	100	59	CAVSVGTSGTYKYIF	TRA
TCGA-BH-A1EW	Primary Tumor	HWI-ST467_110093165:3:24:14614:41987	AE000658|TRAV1-2*01|Homo	31/33 nt	93.9394	31	M94081|TRAJ33*01|Homo	57/57 nt	100	57	CAGMDSNYQLIW	TRA
TCGA-BH-A1EW	Primary Tumor	HWI-ST467_110093165:3:48:17074:121791	S81645|TRAV29/DV5*02|Homo	33/34 nt	97.0588	33	M94081|TRAJ32*01|Homo	64/65 nt	98.4615	64	CAANYGGATNKLIF	TRA
TCGA-BH-A1EW	Primary Tumor	HWI-ST467_110093165:3:43:18048:117348	AE000659|TRAV12-1*01|Homo	41/42 nt	97.619	41	M94081|TRAJ27*01|Homo	57/57 nt	100	57	CVVNYTNAGKSTF	TRA
TCGA-BH-A1EW	Primary Tumor	HWI-ST467_110093165:3:22:3283:37353	M17659|TRAV2*02|Homo	31/31 nt	100	31	M94081|TRAJ23*01|Homo	60/60 nt	100	60	CAVLYNQGGKLIF	TRA
TCGA-BH-A1EW	Primary Tumor	HWI-ST467_110093165:3:64:2062:48423	AE000660|TRAV27*01|Homo	31/32 nt	96.875	31	X05775|TRAJ15*01|Homo	58/58 nt	100	58	CILGPNQAGTALIF	TRA
TCGA-BH-A1EW	Primary Tumor	HWI-ST467_110093165:3:7:16360:133448	AE000659|TRAV8-1*01|Homo	32/32 nt	100	32	AC023226|TRAJ13*02|Homo	60/60 nt	100	60	CALHSGGYQKVTF	TRA
TCGA-BH-A1EW	Primary Tumor	HWI-ST467_110093165:3:68:3314:154745	AE000659|TRAV8-1*01|Homo	24/26 nt	92.3077	24	AC023226|TRAJ13*02|Homo	60/60 nt	100	60	CALHSGGYQKVTF	TRA
TCGA-BH-A1EW	Primary Tumor	HWI-ST467_110093165:3:6:13781:21681	AE000658|TRAV1-1*01|Homo	22/22 nt	100	22	M94081|TRAJ13*01|Homo	57/57 nt	100	57	CAVRDRGAAGGYQKVTF	TRA
TCGA-BH-A1EW	Primary Tumor	HWI-ST467_110093165:3:1:12131:182642	AE000660|TRAV20*01|Homo	37/37 nt	100	37	M94081|TRAJ10*01|Homo	42/42 nt	100	42	CAVGRLRVGRILTGGGNKLTF	TRA
TCGA-PE-A5DC	Primary Tumor	HWI-ST791:138827774:D21W4ACXX:8:2301:19632:73672	M12423|TRAV8-4*02|Homo	32/32 nt	100	32	M94081|TRAJ52*01|Homo	61/61 nt	100	61	CAVSGGTSYGKLTF	TRA
TCGA-PE-A5DC	Primary Tumor	HWI-ST791:138827774:D21W4ACXX:7:1306:7921:21704	M21624|TRAV14/DV4*03|Homo	19/21 nt	90.4762	19	M94081|TRAJ43*01|Homo	52/54 nt	96.2963	52	CDNNNDMRF	TRA
TCGA-A2-A0YI	Primary Tumor	HWUSI-EAS1568_108685007:4:91:7309:13385#0	AE000659|TRAV8-3*01|Homo	65/66 nt	98.4848	65	M14905|TRAJ31*01|Homo	31/31 nt	100	31	CAVGAFNNARLMF	TRA
TCGA-A2-A0YI	Primary Tumor	HWUSI-EAS1568_108685007:4:86:11139:1181#0	X04954|TRAV13-1*02|Homo	70/70 nt	100	70	X02886|TRAJ22*01|Homo	27/27 nt	100	27	CAAFSGSARQLTF	TRA
TCGA-A2-A0YI	Primary Tumor	HWUSI-EAS1568_108685007:3:96:6659:5231#0	AE000659|TRAV12-2*01|Homo	56/56 nt	100	56	M94081|TRAJ43*01|Homo	40/40 nt	100	40	CALYNDMRF	TRA
TCGA-A2-A0YI	Primary Tumor	HWUSI-EAS1568_108685007:4:42:12084:15988#0	X02850|TRAV8-6*01|Homo	44/44 nt	100	44	X02886|TRAJ22*01|Homo	43/43 nt	100	43	CAVSRSTSGSARQLTF	TRA
TCGA-A2-A0YI	Primary Tumor	HWUSI-EAS1568_108685007:4:104:11951:12179#0	AE000660|TRAV17*01|Homo	80/80 nt	100	80	M94081|TRAJ43*01|Homo	19/19 nt	100	19	CATDYNNDMRF	TRA
TCGA-A2-A0YI	Primary Tumor	HWUSI-EAS1568_108685007:4:81:4482:12042#0	AE000659|TRAV12-1*01|Homo	31/31 nt	100	31	M94081|TRAJ38*01|Homo	60/60 nt	100	60	CGYKGNAGNNRKLIW	TRA
TCGA-A2-A0YI	Primary Tumor	HWUSI-EAS1568_108685007:3:6:6714:9803#0	AE000658|TRAV1-2*01|Homo	46/46 nt	100	46	M94081|TRAJ33*01|Homo	49/49 nt	100	49	CAATDSNYQLIW	TRA
TCGA-A2-A0YI	Primary Tumor	HWUSI-EAS1568_108685007:4:94:12323:7196#0	AE000660|TRAV26-1*01|Homo	37/37 nt	100	37	X02886|TRAJ22*01|Homo	58/58 nt	100	58	CCVLLHRQSRGISSGSARQLTF	TRA
TCGA-A2-A0YI	Primary Tumor	HWUSI-EAS1568_108685007:4:70:5470:9325#0	AE000658|TRAV3*01|Homo	34/34 nt	100	34	X02886|TRAJ22*01|Homo	62/62 nt	100	62	CAVRASSGSARQLTF	TRA
TCGA-A2-A0YI	Primary Tumor	HWUSI-EAS1568_108685007:4:86:11139:1181#0	AE000659|TRAV13-1*01|Homo	45/45 nt	100	45	X02886|TRAJ22*01|Homo	52/52 nt	100	52	CAAFSGSARQLTF	TRA
TCGA-A2-A0YI	Primary Tumor	HWUSI-EAS1568_108685007:3:10:12255:1914#0	AE000659|TRAV9-2*01|Homo	19/19 nt	100	19	X05775|TRAJ15*01|Homo	56/56 nt	100	56	CSAVQAGTALIF	TRA
TCGA-A2-A0YI	Primary Tumor	HWUSI-EAS1568_108685007:3:10:12255:1914#0	AE000659|TRAV9-2*01|Homo	42/42 nt	100	42	X05775|TRAJ15*01|Homo	54/54 nt	100	54	CSAVQAGTALIF	TRA
TCGA-BH-A0AY	Primary Tumor	HWUSI-EAS1587_104373808:6:52:11844:18208	AE000659|TRAV6*01|Homo	54/54 nt	100	54	M94081|TRAJ41*01|Homo	43/43 nt	100	43	CALGANSGYALNF	TRA
TCGA-BH-A0AY	Primary Tumor	HWUSI-EAS1587_104373808:6:52:13719:16515	AE000659|TRAV6*01|Homo	54/54 nt	100	54	M94081|TRAJ41*01|Homo	43/43 nt	100	43	CALGANSGYALNF	TRA
TCGA-BH-A0AY	Primary Tumor	HWUSI-EAS1587_104373808:4:110:16637:4763	AE000660|TRAV20*01|Homo	33/33 nt	100	33	M94081|TRAJ53*01|Homo	54/54 nt	100	54	CAVQLPWGGGGSNYKLTF	TRA
TCGA-BH-A0AY	Primary Tumor	HWUSI-EAS1587_104373808:6:11:3512:14109	M17656|TRAV12-3*02|Homo	48/48 nt	100	48	M94081|TRAJ52*01|Homo	51/51 nt	100	51	CAMSPNAGGTSYGKLTF	TRA
TCGA-BH-A0AY	Primary Tumor	HWUSI-EAS1587_104373808:4:8:9262:8822	AE000658|TRAV1-1*01|Homo	34/35 nt	97.1429	34	M94081|TRAJ23*01|Homo	57/57 nt	100	57	CAVRDNQGGKLIF	TRA
TCGA-BH-A0AY	Primary Tumor	HWUSI-EAS1587_104373808:5:111:15025:13905	AE000658|TRAV3*01|Homo	35/35 nt	100	35	M94081|TRAJ10*01|Homo	54/54 nt	100	54	CCESSRGGNKLTF	TRA
TCGA-BH-A1EO	Primary Tumor	HWI-ST489_110553195:6:63:6328:146584	X63455|TRAV8-4*05|Homo	56/56 nt	100	56	M94081|TRAJ48*01|Homo	36/36 nt	100	36	CAVSGIGFGNEKLTF	TRA
TCGA-BH-A1EO	Primary Tumor	HWI-ST489_110553195:6:2:16580:110838	AE000660|TRAV21*01|Homo	66/67 nt	98.5075	66	M35622|TRAJ34*01|Homo	33/33 nt	100	33	CAVKDTDKLIF	TRA
TCGA-BH-A1EO	Primary Tumor	HWI-ST489_110553195:6:63:11233:182866	AE000660|TRAV26-1*01|Homo	55/55 nt	100	55	M94081|TRAJ29*01|Homo	45/45 nt	100	45	CIVRVNSGNTPLVF	TRA
TCGA-BH-A1EO	Primary Tumor	HWI-ST489_110553195:6:46:8979:187576	AE000659|TRAV5*01|Homo	44/44 nt	100	44	M35622|TRAJ34*01|Homo	51/51 nt	100	51	CAESIENTDKLIF	TRA
TCGA-BH-A1EO	Primary Tumor	HWI-ST489_110553195:6:41:7009:38170	AE000659|TRAV5*01|Homo	44/44 nt	100	44	M35622|TRAJ34*01|Homo	51/51 nt	100	51	CAESIENTDKLIF	TRA
TCGA-BH-A1EO	Primary Tumor	HWI-ST489_110553195:6:22:14915:141984	AE000659|TRAV8-2*01|Homo	26/26 nt	100	26	M94081|TRAJ26*01|Homo	55/55 nt	100	55	CVVSERNYGQNFVF	TRA
TCGA-BH-A1EO	Primary Tumor	HWI-ST489_110553195:6:68:16682:56235	AE000659|TRAV8-2*01|Homo	26/26 nt	100	26	M94081|TRAJ26*01|Homo	55/55 nt	100	55	CVVSERNYGQNFVF	TRA
TCGA-B6-A0RP	Primary Tumor	HWUSI-EAS687_106288591:1:116:15385:11670#0	AE000660|TRAV27*01|Homo	56/56 nt	100	56	M94081|TRAJ49*01|Homo	39/39 nt	100	39	CRTNTGNQFYF	TRA
TCGA-B6-A0RP	Primary Tumor	HWUSI-EAS687_106288591:1:114:9851:12377#0	AE000658|TRAV1-2*01|Homo	23/24 nt	95.8333	23	M35620|TRAJ40*01|Homo	56/56 nt	100	56	CAVKSGSGTYKYIF	TRA
TCGA-B6-A0RP	Primary Tumor	HWUSI-EAS687_106288591:2:81:7983:12953#0	AE000660|TRAV17*01|Homo	19/19 nt	100	19	M94081|TRAJ37*01|Homo	52/52 nt	100	52	CATDAGNTGKLIF	TRA
TCGA-A2-A0YH	Primary Tumor	HWI-EAS319_109590618:2:79:17957:2167	AE000659|TRAV8-3*01|Homo	77/77 nt	100	77	M94081|TRAJ47*01|Homo	20/20 nt	100	20	CAVGAREYGNKLVF	TRA
TCGA-A2-A0YH	Primary Tumor	HWUSI-EAS677_108637648:2:120:2567:11800	AE000659|TRAV8-3*01|Homo	77/77 nt	100	77	M94081|TRAJ47*01|Homo	20/20 nt	100	20	CAVGAREYGNKLVF	TRA
TCGA-A2-A0YH	Primary Tumor	HWUSI-EAS677_108637648:2:52:11928:17865	AE000659|TRAV8-3*01|Homo	77/77 nt	100	77	M94081|TRAJ47*01|Homo	20/20 nt	100	20	CAVGAREYGNKLVF	TRA
TCGA-A2-A0YH	Primary Tumor	HWUSI-EAS677_108637648:1:112:16989:16526	X04946|TRAV12-2*03|Homo	69/69 nt	100	69	M94081|TRAJ4*01|Homo	24/24 nt	100	24	CRESITGGYNKLIF	TRA
TCGA-A2-A0YH	Primary Tumor	HWI-EAS319_109590618:2:85:3810:14917	AE000660|TRAV29/DV5*01|Homo	72/72 nt	100	72	M35622|TRAJ34*01|Homo	22/22 nt	100	22	CTSVQQVTNNTDKLIF	TRA
TCGA-A2-A0YH	Primary Tumor	HWI-EAS319_109590618:2:66:2712:2549	X04954|TRAV13-1*02|Homo	20/20 nt	100	20	AJ007774|TRAJ37*02|Homo	51/56 nt	91.0714	51	CAAISNTGKLIF	TRA
TCGA-A2-A0YH	Primary Tumor	HWI-EAS319_109590618:2:86:8381:4615	X04954|TRAV13-1*02|Homo	41/41 nt	100	41	M94081|TRAJ9*01|Homo	54/54 nt	100	54	CAASKGTGGFKTIF	TRA
TCGA-A2-A0YH	Primary Tumor	HWUSI-EAS677_108637648:2:10:17639:6970	X04954|TRAV13-1*02|Homo	41/41 nt	100	41	M94081|TRAJ9*01|Homo	53/54 nt	98.1481	53	CAASKGTGGFKTIF	TRA
TCGA-B6-A0WZ	Primary Tumor	HWUSI-EAS683_108250387:1:118:7171:8488	AE000659|TRAV8-2*01|Homo	76/77 nt	98.7013	76	M94081|TRAJ43*01|Homo	24/24 nt	100	24	CVVRDNDMRF	TRA
TCGA-B6-A0WZ	Primary Tumor	HWUSI-EAS683_108250387:2:54:18779:9011	AE000659|TRAV16*01|Homo	19/20 nt	95	19	M94081|TRAJ43*01|Homo	50/50 nt	100	50	CQRMYYCDNNNDMRF	TRA
TCGA-B6-A0WZ	Primary Tumor	HWUSI-EAS683_108250387:2:17:14994:8151	X61070|TRAV36/DV7*02|Homo	41/41 nt	100	41	M35620|TRAJ40*01|Homo	54/55 nt	98.1818	54	CSSGTYKYIF	TRA
TCGA-B6-A0I2	Primary Tumor	HWI-ST446_106025210:1:28:8979:132263	AE000658|TRAV1-2*01|Homo	66/66 nt	100	66	M94081|TRAJ21*01|Homo	33/33 nt	100	33	CYNFNKFYF	TRA
TCGA-B6-A0I2	Primary Tumor	HWI-ST446_106025210:1:63:7493:63357	X58747|TRAV6*02|Homo	72/72 nt	100	72	M94081|TRAJ42*01|Homo	25/25 nt	100	25	CRLSYLPLCQGGSQGNLIF	TRA
TCGA-B6-A0I2	Primary Tumor	HWI-ST446_106025210:1:41:3369:186113	AE000659|TRAV6*01|Homo	67/71 nt	94.3662	67	X02884|TRAJ3*01|Homo	30/30 nt	100	30	CALTYSSASKIIF	TRA
TCGA-B6-A0I2	Primary Tumor	HWI-ST446_106025210:1:4:16940:68932	AE000659|TRAV12-1*01|Homo	68/68 nt	100	68	M94081|TRAJ10*01|Homo	30/30 nt	100	30	CVVNGGGGNKLTF	TRA
TCGA-B6-A0I2	Primary Tumor	HWI-ST446_106025210:1:46:10235:28517	X04946|TRAV12-2*03|Homo	60/61 nt	98.3607	60	M94081|TRAJ50*01|Homo	28/28 nt	100	28	CAEKPPRETSYDKVIF	TRA
TCGA-B6-A0I2	Primary Tumor	HWI-ST446_106025210:1:45:10978:173818	AE000659|TRAV8-4*01|Homo	55/55 nt	100	55	M94081|TRAJ5*01|Homo	45/47 nt	95.7447	45	CAVSGRTGRRALTF	TRA
TCGA-B6-A0I2	Primary Tumor	HWI-ST446_106025210:1:41:11734:67873	X63455|TRAV8-4*05|Homo	51/51 nt	100	51	M94081|TRAJ33*01|Homo	45/45 nt	100	45	CAVSAGSNYQLIW	TRA
TCGA-B6-A0I2	Primary Tumor	HWI-ST446_106025210:1:45:12586:193529	X63455|TRAV8-4*05|Homo	51/51 nt	100	51	M94081|TRAJ33*01|Homo	45/45 nt	100	45	CAVSAGSNYQLIW	TRA
TCGA-B6-A0I2	Primary Tumor	HWI-ST446_106025210:1:28:20054:20108	AE000659|TRAV9-2*01|Homo	69/69 nt	100	69	M94081|TRAJ7*01|Homo	30/30 nt	100	30	CSVYGNNRLAF	TRA
TCGA-B6-A0I2	Primary Tumor	HWI-ST446_106025210:1:5:4649:161904	AE000659|TRAV9-2*01|Homo	74/74 nt	100	74	AF532854|TRAJ32*02|Homo	22/22 nt	100	22	CALSDRGGATNKLIF	TRA
TCGA-B6-A0I2	Primary Tumor	HWI-ST446_106025210:1:66:13591:12977	M17656|TRAV12-3*02|Homo	54/54 nt	100	54	M35620|TRAJ40*01|Homo	39/39 nt	100	39	CAMRGLSGTYKYIF	TRA
TCGA-B6-A0I2	Primary Tumor	HWI-ST446_106025210:1:27:3198:93491	AE000659|TRAV12-3*01|Homo	49/49 nt	100	49	M35620|TRAJ40*01|Homo	47/47 nt	100	47	CAMSLPTSGTYKYIF	TRA
TCGA-B6-A0I2	Primary Tumor	HWI-ST446_106025210:1:67:2409:131940	AE000660|TRAV24*01|Homo	63/63 nt	100	63	M94081|TRAJ45*01|Homo	37/38 nt	97.3684	37	CALYSGGGADGLTF	TRA
TCGA-B6-A0I2	Primary Tumor	HWI-ST446_106025210:1:2:7233:19787	AE000661|TRAV38-2/DV8*01|Homo	74/74 nt	100	74	M94081|TRAJ32*01|Homo	23/24 nt	95.8333	23	CAYRTNYGGATNKLIF	TRA
TCGA-B6-A0I2	Primary Tumor	HWI-ST446_106025210:1:7:15174:29656	AE000660|TRAV29/DV5*01|Homo	34/35 nt	97.1429	34	M94081|TRAJ54*01|Homo	57/57 nt	100	57	CAAIGVQGAQKLVF	TRA
TCGA-B6-A0I2	Primary Tumor	HWI-ST446_106025210:1:3:5591:171294	AE000659|TRAV9-2*01|Homo	38/38 nt	100	38	M94081|TRAJ45*01|Homo	57/57 nt	100	57	CALRRGGADGLTF	TRA
TCGA-B6-A0I2	Primary Tumor	HWI-ST446_106025210:1:65:2848:57977	AE000660|TRAV21*01|Homo	40/40 nt	100	40	M94081|TRAJ43*01|Homo	50/50 nt	100	50	CAVRPGNNDMRF	TRA
TCGA-B6-A0I2	Primary Tumor	HWI-ST446_106025210:1:44:13562:129005	M21626|TRAV14/DV4*01|Homo	23/23 nt	100	23	M94081|TRAJ42*01|Homo	66/66 nt	100	66	CAMREMNYGGSQGNLIF	TRA
TCGA-B6-A0I2	Primary Tumor	HWI-ST446_106025210:1:1:4115:162135	M21626|TRAV14/DV4*01|Homo	23/23 nt	100	23	M94081|TRAJ42*01|Homo	66/66 nt	100	66	CAMREMNYGGSQGNLIF	TRA
TCGA-B6-A0I2	Primary Tumor	HWI-ST446_106025210:1:63:7493:63357	AE000659|TRAV6*01|Homo	21/21 nt	100	21	M94081|TRAJ42*01|Homo	58/58 nt	100	58	CQGGSQGNLIF	TRA
TCGA-B6-A0I2	Primary Tumor	HWI-ST446_106025210:1:27:15602:199750	AE000660|TRAV17*01|Homo	45/45 nt	100	45	AJ007774|TRAJ37*02|Homo	53/53 nt	100	53	CATDASNTGKLIF	TRA
TCGA-B6-A0I2	Primary Tumor	HWI-ST446_106025210:1:45:12636:108390	AE000658|TRAV1-2*01|Homo	25/25 nt	100	25	M35622|TRAJ34*01|Homo	58/59 nt	98.3051	58	CAVRDLYNTDKLIF	TRA
TCGA-B6-A0I2	Primary Tumor	HWI-ST446_106025210:1:5:19742:140247	AE000658|TRAV1-1*01|Homo	45/47 nt	95.7447	45	M94081|TRAJ30*01|Homo	50/50 nt	100	50	CADEGRDDKIIF	TRA
TCGA-E2-A14T	Primary Tumor	HWUSI-EAS1612_110063878:5:14:15798:5440	AE000659|TRAV6*01|Homo	59/59 nt	100	59	M94081|TRAJ7*01|Homo	37/37 nt	100	37	CALVYGNNRLAF	TRA
TCGA-E2-A14T	Primary Tumor	HWUSI-EAS1612_110063878:6:16:5031:14914#0	X04954|TRAV13-1*02|Homo	51/51 nt	100	51	M94081|TRAJ50*01|Homo	48/48 nt	100	48	CAASETSYDKVIF	TRA
TCGA-E2-A14T	Primary Tumor	HWUSI-EAS1612_110063878:6:76:3193:11136#0	AE000659|TRAV9-2*01|Homo	60/60 nt	100	60	M94081|TRAJ10*01|Homo	39/39 nt	100	39	CALVTGGGNKLTF	TRA
TCGA-E2-A14T	Primary Tumor	HWUSI-EAS1612_110063878:6:114:12830:20132#0	AE000661|TRAV39*01|Homo	27/27 nt	100	27	M94081|TRAJ50*01|Homo	52/52 nt	100	52	CAVDIDSSYDKVIF	TRA
TCGA-E2-A14T	Primary Tumor	HWUSI-EAS1612_110063878:5:58:4116:4603	AE000661|TRAV39*01|Homo	27/27 nt	100	27	M94081|TRAJ50*01|Homo	52/52 nt	100	52	CAVDIDSSYDKVIF	TRA
TCGA-E2-A14T	Primary Tumor	HWUSI-EAS1612_110063878:6:40:10877:3553#0	AE000660|TRAV26-2*01|Homo	40/40 nt	100	40	M94081|TRAJ36*01|Homo	50/50 nt	100	50	CCCVLLHPERGSGAGANNLFF	TRA
TCGA-A7-A3RF	Primary Tumor	HWI-ST648:140907090:D25FTACXX:5:1211:4950:60811	AE000660|TRAV20*01|Homo	67/67 nt	100	67	M94081|TRAJ26*01|Homo	22/22 nt	100	22	CDNNYGQNFVF	TRA
TCGA-A7-A3RF	Primary Tumor	HWI-ST648:140907090:D25FTACXX:5:1310:20157:30697	AE000658|TRAV1-2*01|Homo	30/30 nt	100	30	M94081|TRAJ33*01|Homo	57/57 nt	100	57	CAVMDSNYQLIW	TRA
TCGA-A1-A0SH	Primary Tumor	HWUSI-EAS1612_106218795:7:69:16454:12875#0	M17658|TRAV13-2*02|Homo	67/67 nt	100	67	M94081|TRAJ52*01|Homo	31/31 nt	100	31	CAERGGTSYGKLTF	TRA
TCGA-A1-A0SH	Primary Tumor	HWUSI-EAS1612_106218795:8:87:2744:15401#0	AE000659|TRAV8-6*02|Homo	51/51 nt	100	51	X05775|TRAJ15*01|Homo	36/36 nt	100	36	CWGGIGQAGTALIF	TRA
TCGA-A1-A0SH	Primary Tumor	HWUSI-EAS1612_106218795:7:22:14707:19587#0	AE000660|TRAV27*01|Homo	23/24 nt	95.8333	23	AF532854|TRAJ32*02|Homo	59/59 nt	100	59	CAGSGTPGGATNKLIF	TRA
TCGA-A1-A0SH	Primary Tumor	HWUSI-EAS1612_106218795:8:16:6543:4320#0	AE000660|TRAV26-1*01|Homo	44/44 nt	100	44	M94081|TRAJ27*01|Homo	55/55 nt	100	55	CIVRVGNTNAGKSTF	TRA
TCGA-AC-A3TN	Primary Tumor	HWI-ST480:137308828:D1W7FACXX:6:1106:11422:44843	AE000659|TRAV6*01|Homo	57/57 nt	100	57	M94081|TRAJ32*01|Homo	39/39 nt	100	39	CALETGATNKLIF	TRA
TCGA-A1-A0SM	Primary Tumor	HWUSI-EAS712_107615007:3:64:7110:18667	AE000659|TRAV8-6*02|Homo	33/33 nt	100	33	M94081|TRAJ33*01|Homo	55/55 nt	100	55	CCESDSNYQLIW	TRA
TCGA-BH-A0C7	Primary Tumor	HWUSI-EAS677_109110875:7:72:16818:18456#0	AE000658|TRAV1-2*01|Homo	50/50 nt	100	50	AF532854|TRAJ32*02|Homo	45/45 nt	100	45	CASCGATNKLIF	TRA
TCGA-BH-A0C7	Primary Tumor	HWUSI-EAS677_109110875:8:40:18831:9449#0	AE000658|TRAV3*01|Homo	53/53 nt	100	53	M94081|TRAJ45*01|Homo	42/42 nt	100	42	CAVRDYRGGGADGLTF	TRA
TCGA-BH-A0C7	Primary Tumor	HWUSI-EAS677_109110875:7:80:11438:9640#0	AE000659|TRAV5*01|Homo	66/66 nt	100	66	M35620|TRAJ40*01|Homo	30/30 nt	100	30	CAEINSGTYKYIF	TRA
TCGA-BH-A0C7	Primary Tumor	HWUSI-EAS677_109110875:7:117:10911:13563#0	AE000659|TRAV8-1*01|Homo	60/60 nt	100	60	M94081|TRAJ42*01|Homo	39/39 nt	100	39	CAVNGGSQGNLIF	TRA
TCGA-BH-A0C7	Primary Tumor	HWUSI-EAS677_109110875:7:78:13148:20501#0	X04946|TRAV12-2*03|Homo	52/52 nt	100	52	M94081|TRAJ5*01|Homo	39/39 nt	100	39	CAVLGEDTGRRALTF	TRA
TCGA-BH-A0C7	Primary Tumor	HWUSI-EAS677_109110875:7:118:16498:12766#0	AE000659|TRAV9-2*01|Homo	55/55 nt	100	55	M94081|TRAJ4*01|Homo	41/41 nt	100	41	CALSGYSGGYNKLIF	TRA
TCGA-BH-A0C7	Primary Tumor	HWUSI-EAS677_109110875:8:12:18667:12401#0	AE000659|TRAV16*01|Homo	52/52 nt	100	52	M14905|TRAJ31*01|Homo	39/39 nt	100	39	CITVLLHFNNNARLMF	TRA
TCGA-BH-A0C7	Primary Tumor	HWUSI-EAS677_109110875:8:52:7440:8637#0	AE000660|TRAV25*01|Homo	66/66 nt	100	66	M94081|TRAJ36*01|Homo	32/32 nt	100	32	CAGRTGANNLFF	TRA
TCGA-A8-A08X	Primary Tumor	HWUSI-EAS776_104322696:5:6:13294:4218	AE000658|TRAV2*01|Homo	69/69 nt	100	69	X02886|TRAJ22*01|Homo	27/27 nt	100	27	CAVELPSGSARQLTF	TRA
TCGA-A8-A08X	Primary Tumor	HWUSI-EAS776_104322696:6:7:2645:19352	AE000659|TRAV12-1*01|Homo	81/81 nt	100	81	M94081|TRAJ36*01|Homo	19/19 nt	100	19	CVVQTGANNLFF	TRA
TCGA-A8-A08X	Primary Tumor	HWUSI-EAS776_104322696:4:13:10350:17960	M17657|TRAV12-1*02|Homo	68/68 nt	100	68	M94081|TRAJ29*01|Homo	28/28 nt	100	28	CGELPNSGNTPLVF	TRA
TCGA-A8-A08X	Primary Tumor	HWUSI-EAS776_104322696:4:87:7061:11684	AE000659|TRAV13-2*01|Homo	59/59 nt	100	59	M94081|TRAJ49*01|Homo	37/37 nt	100	37	CAENRDTGNQFYF	TRA
TCGA-A8-A08X	Primary Tumor	HWUSI-EAS776_104322696:4:72:8065:7570	M17665|TRAV8-4*07|Homo	22/22 nt	100	22	M94081|TRAJ43*01|Homo	54/54 nt	100	54	CAVSSYNNNDMRF	TRA
TCGA-A8-A08X	Primary Tumor	HWUSI-EAS776_104322696:6:103:6401:17395	X04946|TRAV12-2*03|Homo	25/25 nt	100	25	M94081|TRAJ41*01|Homo	53/53 nt	100	53	CAVTGSGYALNF	TRA
TCGA-A8-A08X	Primary Tumor	HWUSI-EAS776_104322696:5:8:18451:1796	AE000659|TRAV6*01|Homo	20/20 nt	100	20	AJ007774|TRAJ37*02|Homo	51/52 nt	98.0769	51	CALPPNTGKLIF	TRA
TCGA-A8-A08X	Primary Tumor	HWUSI-EAS776_104322696:5:75:15269:12711	AE000658|TRAV2*01|Homo	41/41 nt	100	41	M94081|TRAJ23*01|Homo	48/48 nt	100	48	CCLLLCCGGSRKNYNQGGKLIF	TRA
TCGA-A8-A08X	Primary Tumor	HWUSI-EAS776_104322696:5:51:4363:4806	AE000660|TRAV17*01|Homo	21/21 nt	100	21	M94081|TRAJ7*01|Homo	51/51 nt	100	51	CATERNNRLAF	TRA
TCGA-A8-A08X	Primary Tumor	HWUSI-EAS776_104322696:6:116:4710:3418	AE000660|TRAV17*01|Homo	21/21 nt	100	21	M94081|TRAJ7*01|Homo	51/51 nt	100	51	CATERNNRLAF	TRA
TCGA-C8-A3M7	Primary Tumor	HWI-ST495:137338861:C1V14ACXX:4:1110:17496:21670	AE000659|TRAV10*01|Homo	55/55 nt	100	55	M94081|TRAJ26*01|Homo	41/41 nt	100	41	CVVSASYGQNFVF	TRA
TCGA-C8-A3M7	Primary Tumor	HWI-ST495:137338861:C1V14ACXX:4:2205:9923:54882	X04946|TRAV12-2*03|Homo	77/77 nt	100	77	M94081|TRAJ54*01|Homo	20/20 nt	100	20	CAVSEGAQKLVF	TRA
TCGA-C8-A3M7	Primary Tumor	HWI-ST495:137338861:C1V14ACXX:4:2205:9923:54882	X04946|TRAV12-2*03|Homo	72/72 nt	100	72	M94081|TRAJ54*01|Homo	25/25 nt	100	25	CAVSEGAQKLVF	TRA
TCGA-C8-A3M7	Primary Tumor	HWI-ST495:137338861:C1V14ACXX:3:2109:7031:14421	AE000660|TRAV35*01|Homo	69/69 nt	100	69	M14905|TRAJ31*01|Homo	25/25 nt	100	25	CRHLLLCWAAYHNNARLMF	TRA
TCGA-C8-A3M7	Primary Tumor	HWI-ST495:137338861:C1V14ACXX:3:2109:7031:14421	AE000660|TRAV35*01|Homo	37/37 nt	100	37	M14905|TRAJ31*01|Homo	54/54 nt	100	54	CRHLLLCWAAYHNNARLMF	TRA
TCGA-C8-A3M7	Primary Tumor	HWI-ST495:137338861:C1V14ACXX:4:2311:4049:36610	AE000660|TRAV24*01|Homo	25/25 nt	100	25	M94081|TRAJ29*01|Homo	54/54 nt	100	54	CARPPGNTPLVF	TRA
TCGA-C8-A3M7	Primary Tumor	HWI-ST495:137338861:C1V14ACXX:4:1211:2708:74043	AE000659|TRAV13-1*01|Homo	26/26 nt	100	26	M94081|TRAJ23*01|Homo	57/57 nt	100	57	CAAGDNQGGKLIF	TRA
TCGA-A8-A06R	Primary Tumor	HWI-ST791_110417687:8:46:2658:36239	AE000661|TRAV38-2/DV8*01|Homo	66/66 nt	100	66	M94081|TRAJ54*01|Homo	30/30 nt	100	30	CISVLIGAPLIQGAQKLVF	TRA
TCGA-AC-A3W5	Primary Tumor	HWI-D00170:137829434:H0MVCADXX:1:1203:16052:81131	AE000661|TRAV38-1*01|Homo	30/30 nt	100	30	M94081|TRAJ45*01|Homo	58/58 nt	100	58	CAFMKWGGGADGLTF	TRA
TCGA-A2-A1FX	Primary Tumor	HWI-ST495_114207489:1:1205:9115:159634	AE000659|TRAV5*01|Homo	77/77 nt	100	77	AF532854|TRAJ32*02|Homo	21/21 nt	100	21	CAETGGATNKLIF	TRA
TCGA-A2-A1FX	Primary Tumor	HWI-ST495_114207489:1:2103:10759:75547	AE000659|TRAV5*01|Homo	77/77 nt	100	77	AF532854|TRAJ32*02|Homo	21/21 nt	100	21	CAETGGATNKLIF	TRA
TCGA-A2-A1FX	Primary Tumor	HWI-ST495_114207489:1:2104:15480:117376	AE000659|TRAV5*01|Homo	77/77 nt	100	77	AF532854|TRAJ32*02|Homo	21/21 nt	100	21	CAETGGATNKLIF	TRA
TCGA-A2-A1FX	Primary Tumor	HWI-ST495_114207489:1:2108:4792:149758	AE000659|TRAV5*01|Homo	77/77 nt	100	77	AF532854|TRAJ32*02|Homo	20/21 nt	95.2381	20	CAETGGATKKLIF	TRA
TCGA-A2-A1FX	Primary Tumor	HWI-ST495_114207489:2:1103:8713:154712	AE000659|TRAV5*01|Homo	77/77 nt	100	77	AF532854|TRAJ32*02|Homo	21/21 nt	100	21	CAETGGATNKLIF	TRA
TCGA-A2-A1FX	Primary Tumor	HWI-ST495_114207489:3:1105:7128:26732	AE000659|TRAV5*01|Homo	77/77 nt	100	77	AF532854|TRAJ32*02|Homo	21/21 nt	100	21	CAETGGATNKLIF	TRA
TCGA-A2-A1FX	Primary Tumor	HWI-ST495_114207489:3:1107:12368:4833	AE000659|TRAV5*01|Homo	77/77 nt	100	77	AF532854|TRAJ32*02|Homo	21/21 nt	100	21	CAETGGATNKLIF	TRA
TCGA-A2-A1FX	Primary Tumor	HWI-ST495_114207489:3:2102:4092:110430	AE000659|TRAV5*01|Homo	77/77 nt	100	77	AF532854|TRAJ32*02|Homo	21/21 nt	100	21	CAETGGATNKLIF	TRA
TCGA-E2-A1B6	Primary Tumor	HWI-ST735_110635976:3:64:19900:69979	AE000659|TRAV8-1*01|Homo	59/60 nt	98.3333	59	M94081|TRAJ30*01|Homo	38/38 nt	100	38	CAVNAMNRDDKIIF	TRA
TCGA-E2-A1B6	Primary Tumor	HWI-ST735_110635976:3:8:11338:138156	AE000659|TRAV8-1*01|Homo	60/60 nt	100	60	M94081|TRAJ30*01|Homo	38/38 nt	100	38	CAVNAMNRDDKIIF	TRA
TCGA-E2-A1B6	Primary Tumor	HWI-ST735_110635976:3:45:4984:168255	AE000659|TRAV8-3*01|Homo	53/53 nt	100	53	M16747|TRAJ6*01|Homo	40/40 nt	100	40	CAVATGSGGSYIPTF	TRA
TCGA-E2-A1B6	Primary Tumor	HWI-ST735_110635976:3:67:11297:43138	AE000659|TRAV13-1*01|Homo	71/71 nt	100	71	M94081|TRAJ7*01|Homo	26/26 nt	100	26	CLLLCVYGNNRLAF	TRA
TCGA-E2-A1B6	Primary Tumor	HWI-ST735_110635976:3:4:17799:71680	M17656|TRAV12-3*02|Homo	58/58 nt	100	58	M94081|TRAJ26*01|Homo	33/33 nt	100	33	CAMPTPYGQNFVF	TRA
TCGA-E2-A1B6	Primary Tumor	HWI-ST735_110635976:3:28:18965:123780	AE000660|TRAV19*01|Homo	71/74 nt	95.9459	71	M94081|TRAJ26*01|Homo	29/29 nt	100	29	CALRGYGQNFVF	TRA
TCGA-E2-A1B6	Primary Tumor	HWI-ST735_110635976:3:3:5669:73620	AE000660|TRAV21*01|Homo	51/51 nt	100	51	M35620|TRAJ40*01|Homo	46/46 nt	100	46	CAVDSGTYKYIF	TRA
TCGA-E2-A1B6	Primary Tumor	HWI-ST735_110635976:3:27:19264:136161	AE000660|TRAV25*01|Homo	67/67 nt	100	67	M94081|TRAJ29*01|Homo	22/23 nt	95.6522	22	CAGRSGNTHLVF	TRA
TCGA-E2-A1B6	Primary Tumor	HWI-ST735_110635976:3:22:9007:186128	AE000660|TRAV26-2*01|Homo	70/70 nt	100	70	M94081|TRAJ27*01|Homo	26/26 nt	100	26	CCCVLLHPERRLTNAGKSTF	TRA
TCGA-E2-A1B6	Primary Tumor	HWI-ST735_110635976:3:42:5651:168126	AE000661|TRAV41*01|Homo	53/53 nt	100	53	M94081|TRAJ49*01|Homo	42/42 nt	100	42	CAVRSGNTGNQFYF	TRA
TCGA-E2-A1B6	Primary Tumor	HWI-ST735_110635976:3:42:3339:33327	AE000660|TRAV26-1*01|Homo	34/35 nt	97.1429	34	M94081|TRAJ57*01|Homo	53/53 nt	100	53	CTIASSVIRCPQGGSEKLVF	TRA
TCGA-E2-A1B6	Primary Tumor	HWI-ST735_110635976:3:45:12861:179543	AE000660|TRAV26-1*01|Homo	35/35 nt	100	35	M94081|TRAJ57*01|Homo	53/53 nt	100	53	CTIASSVIRCPQGGSEKLVF	TRA
TCGA-E2-A1B6	Primary Tumor	HWI-ST735_110635976:3:45:18644:113308	AE000659|TRAV16*01|Homo	35/36 nt	97.2222	35	M94081|TRAJ53*01|Homo	61/61 nt	100	61	CSKGSGGSNYKLTF	TRA
TCGA-E2-A1B6	Primary Tumor	HWI-ST735_110635976:3:62:18163:34882	X04954|TRAV13-1*02|Homo	20/20 nt	100	20	M94081|TRAJ50*01|Homo	57/57 nt	100	57	CAAMETSYDKVIF	TRA
TCGA-E2-A1B6	Primary Tumor	HWI-ST735_110635976:3:26:12805:186043	AE000661|TRAV38-1*01|Homo	45/45 nt	100	45	M94081|TRAJ48*01|Homo	52/52 nt	100	52	CDVFLCFHEATSNFGNEKLTF	TRA
TCGA-E2-A1B6	Primary Tumor	HWI-ST735_110635976:3:1:2116:121064	AE000661|TRAV38-1*01|Homo	37/38 nt	97.3684	37	M94081|TRAJ48*01|Homo	55/55 nt	100	55	CAFMRTINFGNEKLTF	TRA
TCGA-E2-A1B6	Primary Tumor	HWI-ST735_110635976:3:48:20750:42620	AE000659|TRAV10*01|Homo	48/50 nt	96	48	M94081|TRAJ48*01|Homo	44/44 nt	100	44	CGESSNFGNEKLTF	TRA
TCGA-E2-A1B6	Primary Tumor	HWI-ST735_110635976:3:47:13660:139524	AE000660|TRAV26-1*01|Homo	30/30 nt	100	30	M94081|TRAJ48*01|Homo	57/57 nt	100	57	CIAPFHFGNEKLTF	TRA
TCGA-E2-A1B6	Primary Tumor	HWI-ST735_110635976:3:21:7746:43418	X73521|TRAV40*01|Homo	37/37 nt	100	37	M94081|TRAJ42*01|Homo	57/57 nt	100	57	CTTVLPGGSQGNLIF	TRA
TCGA-E2-A1B6	Primary Tumor	HWI-ST735_110635976:3:65:8805:8624	AE000659|TRAV9-2*01|Homo	39/40 nt	97.5	39	M35620|TRAJ40*01|Homo	57/57 nt	100	57	CALMRSSGTYKYIF	TRA
TCGA-E2-A1B6	Primary Tumor	HWI-ST735_110635976:3:62:10479:91232	AE000660|TRAV17*01|Homo	29/30 nt	96.6667	29	M35620|TRAJ40*01|Homo	54/54 nt	100	54	CATHDGTGTYKYIF	TRA
TCGA-E2-A1B6	Primary Tumor	HWI-ST735_110635976:3:62:5977:49470	AE000660|TRAV35*01|Homo	23/23 nt	100	23	M35620|TRAJ40*01|Homo	52/52 nt	100	52	CWAAPGTYKYIF	TRA
TCGA-E2-A1B6	Primary Tumor	HWI-ST735_110635976:3:66:2601:105074	AE000660|TRAV35*01|Homo	23/23 nt	100	23	M35620|TRAJ40*01|Homo	52/52 nt	100	52	CWAAPGTYKYIF	TRA
TCGA-E2-A1B6	Primary Tumor	HWI-ST735_110635976:3:8:8388:101851	AE000660|TRAV29/DV5*01|Homo	39/39 nt	100	39	M94081|TRAJ36*01|Homo	55/55 nt	100	55	CSVLLCSKREGTGANNLFF	TRA
TCGA-E2-A1B6	Primary Tumor	HWI-ST735_110635976:3:43:8004:171273	AE000659|TRAV6*01|Homo	20/20 nt	100	20	M14905|TRAJ31*01|Homo	56/56 nt	100	56	CSRDGRNNNARLMF	TRA
TCGA-E2-A1B6	Primary Tumor	HWI-ST735_110635976:3:27:19264:136161	AE000660|TRAV25*01|Homo	29/29 nt	100	29	M94081|TRAJ29*01|Homo	55/55 nt	100	55	CAGRSGNTPLVF	TRA
TCGA-E2-A1B6	Primary Tumor	HWI-ST735_110635976:3:62:10776:93718	AE000658|TRAV1-2*01|Homo	45/45 nt	100	45	M94081|TRAJ28*01|Homo	53/53 nt	100	53	CAPYSGAGSYQLTF	TRA
TCGA-E2-A1B6	Primary Tumor	HWI-ST735_110635976:3:41:13000:69062	AE000660|TRAV27*01|Homo	45/46 nt	97.8261	45	M94081|TRAJ27*01|Homo	44/44 nt	100	44	CARCYNTNAGKSTF	TRA
TCGA-E2-A1B6	Primary Tumor	HWI-ST735_110635976:3:61:20237:74964	AE000660|TRAV27*01|Homo	37/37 nt	100	37	X02886|TRAJ22*01|Homo	58/59 nt	98.3051	58	CAGNSGSARQLTF	TRA
TCGA-E2-A1B6	Primary Tumor	HWI-ST735_110635976:3:3:16810:176985	AE000660|TRAV17*01|Homo	20/20 nt	100	20	X02885|TRAJ12*01|Homo	50/50 nt	100	50	CYGPNPSYKLIF	TRA
TCGA-E2-A1B6	Primary Tumor	HWI-ST735_110635976:3:61:13525:146394	AE000658|TRAV1-2*01|Homo	27/27 nt	100	27	M94081|TRAJ9*01|Homo	57/57 nt	100	57	CAVRDTGGFKTIF	TRA
TCGA-E2-A1B6	Primary Tumor	HWI-ST735_110635976:3:67:11297:43138	X04954|TRAV13-1*02|Homo	20/20 nt	100	20	M94081|TRAJ7*01|Homo	56/56 nt	100	56	CLLLCVYGNNRLAF	TRA
TCGA-E2-A1B6	Primary Tumor	HWI-ST735_110635976:3:24:15253:181270	M17657|TRAV12-1*02|Homo	29/29 nt	100	29	M94081|TRAJ5*01|Homo	57/57 nt	100	57	CVVNTGRRALTF	TRA
TCGA-E2-A14P	Primary Tumor	HWI-ST729_110146375:4:24:5594:8082	AE000658|TRAV1-2*01|Homo	75/75 nt	100	75	M94081|TRAJ18*01|Homo	20/20 nt	100	20	CLLPLCCERGGRGSTLGRLYF	TRA
TCGA-E2-A14P	Primary Tumor	HWI-ST729_110146375:4:5:19394:54532	AE000658|TRAV1-2*01|Homo	75/75 nt	100	75	M94081|TRAJ18*01|Homo	20/20 nt	100	20	CLLPLCCERGGRGSTLGRLYF	TRA
TCGA-E2-A14P	Primary Tumor	HWI-ST729_110146375:4:26:1343:162289	AE000660|TRAV26-1*01|Homo	59/59 nt	100	59	M94081|TRAJ52*01|Homo	34/35 nt	97.1429	34	CIVRVDAGGTSYGKVTF	TRA
TCGA-E2-A14P	Primary Tumor	HWI-ST729_110146375:4:66:10491:146614	AE000660|TRAV26-1*01|Homo	59/59 nt	100	59	M94081|TRAJ52*01|Homo	41/41 nt	100	41	CIVRVDAGGTSYGKLTF	TRA
TCGA-E2-A14P	Primary Tumor	HWI-ST729_110146375:4:22:9559:12725	AE000660|TRAV19*01|Homo	22/22 nt	100	22	M94081|TRAJ43*01|Homo	52/52 nt	100	52	CALWGNNNDMRF	TRA
TCGA-E2-A14P	Primary Tumor	HWI-ST729_110146375:4:41:5012:58321	AE000659|TRAV12-2*01|Homo	47/50 nt	94	47	M94081|TRAJ42*01|Homo	47/47 nt	100	47	CAFYGGSQGNLIF	TRA
TCGA-E2-A14P	Primary Tumor	HWI-ST729_110146375:4:48:8151:197962	AE000659|TRAV16*01|Homo	24/24 nt	100	24	M14905|TRAJ31*01|Homo	52/52 nt	100	52	CALSPRGNNARLMF	TRA
TCGA-E2-A14P	Primary Tumor	HWI-ST729_110146375:4:27:12648:23408	AE000660|TRAV26-2*01|Homo	32/32 nt	100	32	M94081|TRAJ26*01|Homo	54/54 nt	100	54	CILRDYGQNFVF	TRA
TCGA-E2-A14P	Primary Tumor	HWI-ST729_110146375:4:6:3633:28010	AE000660|TRAV8-7*01|Homo	22/22 nt	100	22	M94081|TRAJ23*01|Homo	52/52 nt	100	52	CAVGENQGGKLIF	TRA
TCGA-E2-A14P	Primary Tumor	HWI-ST729_110146375:4:3:15245:109717	AE000659|TRAV8-3*01|Homo	43/43 nt	100	43	X02886|TRAJ22*01|Homo	53/53 nt	100	53	CAVGPPSGSARQLTF	TRA
TCGA-E2-A14P	Primary Tumor	HWI-ST729_110146375:4:4:4926:123718	AE000659|TRAV13-2*01|Homo	28/28 nt	100	28	M94081|TRAJ10*01|Homo	56/56 nt	100	56	CAENMGGGGNKLTF	TRA
TCGA-EW-A3E8	Primary Tumor	HWI-ST485:137341042:D1WPGACXX:7:2311:7033:10223	AE000659|TRAV9-2*01|Homo	47/47 nt	100	47	M94081|TRAJ20*01|Homo	47/47 nt	100	47	CALSSYSNDYKLSF	TRA
TCGA-BH-A0BL	Primary Tumor	HWI-ST466_110055566:6:66:21320:78427	AE000659|TRAV8-1*01|Homo	60/60 nt	100	60	M14905|TRAJ31*01|Homo	35/36 nt	97.2222	35	CAVNAPNARLMF	TRA
TCGA-BH-A0BL	Primary Tumor	HWI-ST466_110055566:6:26:14713:148881	AE000659|TRAV12-2*01|Homo	66/66 nt	100	66	M94081|TRAJ43*01|Homo	31/31 nt	100	31	CAAHNNNDMRF	TRA
TCGA-BH-A0BL	Primary Tumor	HWI-ST466_110055566:6:7:16229:181866	AE000659|TRAV12-2*01|Homo	68/68 nt	100	68	M16747|TRAJ6*01|Homo	29/29 nt	100	29	CAVNVGGSYIPTF	TRA
TCGA-BH-A0BL	Primary Tumor	HWI-ST466_110055566:6:41:16371:60533	X04946|TRAV12-2*03|Homo	54/54 nt	100	54	M94081|TRAJ52*01|Homo	37/37 nt	100	37	CAVLQGGGTSYGKLTF	TRA
TCGA-BH-A0BL	Primary Tumor	HWI-ST466_110055566:6:1:16335:120650	AE000659|TRAV9-2*01|Homo	73/73 nt	100	73	M94081|TRAJ10*01|Homo	28/28 nt	100	28	CALTGGGNKLTF	TRA
TCGA-BH-A0BL	Primary Tumor	HWI-ST466_110055566:6:65:1283:76635	AE000659|TRAV9-2*01|Homo	50/50 nt	100	50	M94081|TRAJ52*01|Homo	42/43 nt	97.6744	42	CALSVHAGGTSYGKVTF	TRA
TCGA-BH-A0BL	Primary Tumor	HWI-ST466_110055566:6:61:20391:179024	AE000660|TRAV21*01|Homo	63/64 nt	98.4375	63	M94081|TRAJ42*01|Homo	42/42 nt	100	42	CCGGSQGNLIF	TRA
TCGA-BH-A0BL	Primary Tumor	HWI-ST466_110055566:6:45:5207:101086	M17660|TRAV23/DV6*02|Homo	59/59 nt	100	59	M94081|TRAJ21*01|Homo	29/29 nt	100	29	CAGVRADNFNKFYF	TRA
TCGA-BH-A0BL	Primary Tumor	HWI-ST466_110055566:6:22:19705:195156	M27371|TRAV26-1*02|Homo	54/54 nt	100	54	M94081|TRAJ26*01|Homo	41/41 nt	100	41	CIVRPYYGQNFVF	TRA
TCGA-BH-A0BL	Primary Tumor	HWI-ST466_110055566:6:48:19824:102145	AE000660|TRAV26-1*01|Homo	55/55 nt	100	55	M94081|TRAJ26*01|Homo	41/41 nt	100	41	CIVRPYYGQNFVF	TRA
TCGA-BH-A0BL	Primary Tumor	HWI-ST466_110055566:6:1:8909:94351	AE000660|TRAV27*01|Homo	67/67 nt	100	67	M94081|TRAJ36*01|Homo	33/33 nt	100	33	CAGAGANNLFF	TRA
TCGA-BH-A0BL	Primary Tumor	HWI-ST466_110055566:6:64:13038:146253	AE000660|TRAV30*01|Homo	54/54 nt	100	54	M35620|TRAJ40*01|Homo	43/43 nt	100	43	CGTYTSGTYKYIF	TRA
TCGA-BH-A0BL	Primary Tumor	HWI-ST466_110055566:6:45:10623:189354	AE000660|TRAV35*01|Homo	38/38 nt	100	38	M35619|TRAJ44*01|Homo	55/55 nt	100	55	CAGQLNPGTASKLTF	TRA
TCGA-BH-A0BL	Primary Tumor	HWI-ST466_110055566:6:2:15003:67297	AE000660|TRAV35*01|Homo	37/38 nt	97.3684	37	M35619|TRAJ44*01|Homo	55/55 nt	100	55	CAGQLNPGTASKLTF	TRA
TCGA-BH-A0BL	Primary Tumor	HWI-ST466_110055566:6:7:14896:164565	AE000660|TRAV29/DV5*01|Homo	27/27 nt	100	27	M35620|TRAJ40*01|Homo	53/53 nt	100	53	CAASARGTYKYIF	TRA
TCGA-BH-A0BL	Primary Tumor	HWI-ST466_110055566:6:61:15384:86633	AE000659|TRAV8-1*01|Homo	44/45 nt	97.7778	44	M94081|TRAJ38*01|Homo	51/51 nt	100	51	CSGVTQRRDNRKLIW	TRA
TCGA-BH-A0BL	Primary Tumor	HWI-ST466_110055566:6:2:9619:109123	AE000659|TRAV8-1*01|Homo	44/45 nt	97.7778	44	M94081|TRAJ38*01|Homo	51/51 nt	100	51	CSGVTQRRDNRKLIW	TRA
TCGA-BH-A0BL	Primary Tumor	HWI-ST466_110055566:6:28:15116:80119	AE000659|TRAV8-1*01|Homo	41/42 nt	97.619	41	M94081|TRAJ38*01|Homo	51/51 nt	100	51	CSGVTQRRDNRKLIW	TRA
TCGA-BH-A0BL	Primary Tumor	HWI-ST466_110055566:6:21:9654:84646	AE000659|TRAV8-1*01|Homo	44/45 nt	97.7778	44	M94081|TRAJ38*01|Homo	51/51 nt	100	51	CSGVTQRRDNRKLIW	TRA
TCGA-BH-A0BL	Primary Tumor	HWI-ST466_110055566:6:44:5422:78852	AE000660|TRAV17*01|Homo	27/28 nt	96.4286	27	M94081|TRAJ36*01|Homo	58/58 nt	100	58	CAAQTGANNLFF	TRA
TCGA-BH-A0BL	Primary Tumor	HWI-ST466_110055566:6:43:17041:39543	AE000658|TRAV1-2*01|Homo	25/25 nt	100	25	M94081|TRAJ20*01|Homo	50/50 nt	100	50	CAVRDSDYKLSF	TRA
TCGA-AO-A0J4	Primary Tumor	HWUSI-EAS631_106053656:5:67:11705:10102	AE000658|TRAV4*01|Homo	66/66 nt	100	66	M94081|TRAJ20*01|Homo	26/26 nt	100	26	CCVLLPRPSNYKLSF	TRA
TCGA-AO-A0J4	Primary Tumor	HWUSI-EAS631_106053656:5:25:18125:3206	AE000658|TRAV4*01|Homo	54/54 nt	100	54	M94081|TRAJ20*01|Homo	38/38 nt	100	38	CCVLLPRPSNYKLSF	TRA
TCGA-AO-A0J4	Primary Tumor	HWUSI-EAS631_106053656:5:62:15076:15813	AE000659|TRAV12-1*01|Homo	49/49 nt	100	49	X05775|TRAJ15*01|Homo	47/50 nt	94	47	CVVIQPPAGTALIF	TRA
TCGA-AO-A0J4	Primary Tumor	HWUSI-EAS631_106053656:5:7:2883:17131	AE000659|TRAV13-2*01|Homo	56/56 nt	100	56	M94081|TRAJ24*02|Homo	41/42 nt	97.619	41	CAENNQADSWGKLQF	TRA
TCGA-AO-A0J4	Primary Tumor	HWUSI-EAS631_106053656:6:7:17515:20398	AE000659|TRAV13-2*01|Homo	56/56 nt	100	56	M94081|TRAJ24*02|Homo	41/42 nt	97.619	41	CAENNQADSWGKLQF	TRA
TCGA-AO-A0J4	Primary Tumor	HWUSI-EAS631_106053656:6:72:12041:18220	AE000659|TRAV14/DV4*02|Homo	73/73 nt	100	73	M94081|TRAJ33*01|Homo	22/22 nt	100	22	CAMREGENSNYQLIW	TRA
TCGA-AO-A0J4	Primary Tumor	HWUSI-EAS631_106053656:6:114:2119:14282	AE000659|TRAV14/DV4*02|Homo	70/70 nt	100	70	M94081|TRAJ33*01|Homo	25/25 nt	100	25	CAMREGENSNYQLIW	TRA
TCGA-AO-A0J4	Primary Tumor	HWUSI-EAS631_106053656:5:73:7518:7911	AE000659|TRAV14/DV4*02|Homo	57/57 nt	100	57	M94081|TRAJ33*01|Homo	38/38 nt	100	38	CAMREGENSNYQLIW	TRA
TCGA-AO-A0J4	Primary Tumor	HWUSI-EAS631_106053656:5:3:11169:7256	AE000659|TRAV9-2*01|Homo	69/69 nt	100	69	M94081|TRAJ36*01|Homo	23/23 nt	100	23	CALFRDGANNLFF	TRA
TCGA-AO-A0J4	Primary Tumor	HWUSI-EAS631_106053656:5:33:1280:11493	AE000659|TRAV9-2*01|Homo	60/60 nt	100	60	M94081|TRAJ48*01|Homo	38/38 nt	100	38	CALKNFGNEKLTF	TRA
TCGA-AO-A0J4	Primary Tumor	HWUSI-EAS631_106053656:6:107:13253:16937	M17656|TRAV12-3*02|Homo	66/66 nt	100	66	M94081|TRAJ41*01|Homo	28/28 nt	100	28	CAMKPDSGYALNF	TRA
TCGA-AO-A0J4	Primary Tumor	HWUSI-EAS631_106053656:5:5:11609:5959	AE000659|TRAV12-3*01|Homo	63/63 nt	100	63	M94081|TRAJ41*01|Homo	31/31 nt	100	31	CAMKPDSGYALNF	TRA
TCGA-AO-A0J4	Primary Tumor	HWUSI-EAS631_106053656:6:101:6882:18409	X02850|TRAV8-6*01|Homo	74/74 nt	100	74	M94081|TRAJ39*01|Homo	27/27 nt	100	27	CCDNNAGNMLTF	TRA
TCGA-AO-A0J4	Primary Tumor	HWUSI-EAS631_106053656:6:72:1380:987	AE000659|TRAV8-6*02|Homo	50/50 nt	100	50	X02886|TRAJ22*01|Homo	43/44 nt	97.7273	43	CCDPRSGSARQLTF	TRA
TCGA-AO-A0J4	Primary Tumor	HWUSI-EAS631_106053656:6:59:15423:14138	AE000660|TRAV19*01|Homo	58/62 nt	93.5484	58	M94081|TRAJ57*01|Homo	31/31 nt	100	31	CSEWGPTQGGSEKLVF	TRA
TCGA-AO-A0J4	Primary Tumor	HWUSI-EAS631_106053656:5:112:3200:7574	AE000660|TRAV22*01|Homo	64/64 nt	100	64	M35620|TRAJ40*01|Homo	30/30 nt	100	30	CAVKGTSGTYKYIF	TRA
TCGA-AO-A0J4	Primary Tumor	HWUSI-EAS631_106053656:6:79:12743:8117	AE000660|TRAV27*01|Homo	60/60 nt	100	60	M94081|TRAJ36*01|Homo	40/40 nt	100	40	CRSQTGANNLFF	TRA
TCGA-AO-A0J4	Primary Tumor	HWUSI-EAS631_106053656:5:31:17466:14772	AE000660|TRAV35*01|Homo	53/54 nt	98.1481	53	M94081|TRAJ49*01|Homo	43/43 nt	100	43	CAGQQNQFYF	TRA
TCGA-AO-A0J4	Primary Tumor	HWUSI-EAS631_106053656:6:18:3879:8200	AE000661|TRAV41*01|Homo	67/67 nt	100	67	M94081|TRAJ45*01|Homo	21/21 nt	100	21	CAVRSRVGSGGGADGLTF	TRA
TCGA-AO-A0J4	Primary Tumor	HWUSI-EAS631_106053656:5:27:7852:14310	AE000661|TRAV41*01|Homo	65/65 nt	100	65	M94081|TRAJ45*01|Homo	23/23 nt	100	23	CAVRSRVGSGGGADGLTF	TRA
TCGA-AO-A0J4	Primary Tumor	HWUSI-EAS631_106053656:6:10:2057:17600	AE000661|TRAV41*01|Homo	60/60 nt	100	60	M94081|TRAJ45*01|Homo	26/27 nt	96.2963	26	CAVRSRVRSGGGADGLTF	TRA
TCGA-AO-A0J4	Primary Tumor	HWUSI-EAS631_106053656:5:96:7261:10341	AE000659|TRAV12-2*01|Homo	30/30 nt	100	30	M94081|TRAJ52*01|Homo	67/67 nt	100	67	CREHLNAGGTSYGKLTF	TRA
TCGA-AO-A0J4	Primary Tumor	HWUSI-EAS631_106053656:6:104:3284:12217	M97704|TRAV23/DV6*03|Homo	24/24 nt	100	24	M94081|TRAJ43*01|Homo	54/54 nt	100	54	CAAIRYNNNDMRF	TRA
TCGA-AO-A0J4	Primary Tumor	HWUSI-EAS631_106053656:6:35:13133:19835	AE000660|TRAV17*01|Homo	44/44 nt	100	44	M94081|TRAJ43*01|Homo	47/47 nt	100	47	CATVVNDMRF	TRA
TCGA-AO-A0J4	Primary Tumor	HWUSI-EAS631_106053656:6:6:1591:12114	AE000659|TRAV14/DV4*02|Homo	22/23 nt	95.6522	22	M94081|TRAJ42*01|Homo	59/59 nt	100	59	CCAMREGRGGGSQGNLIF	TRA
TCGA-AO-A0J4	Primary Tumor	HWUSI-EAS631_106053656:5:114:4900:4961	AE000659|TRAV12-3*01|Homo	24/25 nt	96	24	M94081|TRAJ41*01|Homo	54/54 nt	100	54	CAMKPDSGYALNF	TRA
TCGA-AO-A0J4	Primary Tumor	HWUSI-EAS631_106053656:5:45:3338:10409	M17656|TRAV12-3*02|Homo	33/34 nt	97.0588	33	M94081|TRAJ41*01|Homo	54/54 nt	100	54	CAMKPDSGYALNF	TRA
TCGA-AO-A0J4	Primary Tumor	HWUSI-EAS631_106053656:5:78:14245:9396	M17656|TRAV12-3*02|Homo	31/32 nt	96.875	31	M94081|TRAJ41*01|Homo	54/54 nt	100	54	CAMKPDSGYALNF	TRA
TCGA-AO-A0J4	Primary Tumor	HWUSI-EAS631_106053656:6:79:11874:18300	M17656|TRAV12-3*02|Homo	46/46 nt	100	46	M94081|TRAJ41*01|Homo	48/48 nt	100	48	CAMKPDSGYALNF	TRA
TCGA-AO-A0J4	Primary Tumor	HWUSI-EAS631_106053656:6:72:10041:5588	AE000659|TRAV12-3*01|Homo	20/21 nt	95.2381	20	M94081|TRAJ41*01|Homo	54/54 nt	100	54	CAMKPDSGYALNF	TRA
TCGA-AO-A0J4	Primary Tumor	HWUSI-EAS631_106053656:5:114:11639:6202	AE000659|TRAV14/DV4*02|Homo	24/24 nt	100	24	M94081|TRAJ33*01|Homo	54/54 nt	100	54	CAMREGENSNYQLIW	TRA
TCGA-AO-A0J4	Primary Tumor	HWUSI-EAS631_106053656:6:97:5063:6023	AE000659|TRAV14/DV4*02|Homo	28/28 nt	100	28	M94081|TRAJ33*01|Homo	54/54 nt	100	54	CAMREGENSNYQLIW	TRA
TCGA-AO-A0J4	Primary Tumor	HWUSI-EAS631_106053656:5:52:5677:6658	AE000659|TRAV14/DV4*02|Homo	39/39 nt	100	39	M94081|TRAJ33*01|Homo	54/54 nt	100	54	CAMREGENSNYQLIW	TRA
TCGA-AO-A0J4	Primary Tumor	HWUSI-EAS631_106053656:5:96:13542:6590	AE000659|TRAV14/DV4*02|Homo	27/27 nt	100	27	M94081|TRAJ33*01|Homo	54/54 nt	100	54	CAMREGENSNYQLIW	TRA
TCGA-AO-A0J4	Primary Tumor	HWUSI-EAS631_106053656:6:113:1785:3351	AE000659|TRAV14/DV4*02|Homo	41/41 nt	100	41	M94081|TRAJ33*01|Homo	54/54 nt	100	54	CAMREGENSNYQLIW	TRA
TCGA-AO-A0J4	Primary Tumor	HWUSI-EAS631_106053656:5:77:5747:8080	AE000659|TRAV14/DV4*02|Homo	23/23 nt	100	23	M94081|TRAJ33*01|Homo	54/54 nt	100	54	CAMREGENSNYQLIW	TRA
TCGA-AO-A0J4	Primary Tumor	HWUSI-EAS631_106053656:5:111:10352:11462	AE000659|TRAV12-1*01|Homo	44/44 nt	100	44	M94081|TRAJ29*01|Homo	52/52 nt	100	52	CGALNSGNTPLVF	TRA
TCGA-AO-A0J4	Primary Tumor	HWUSI-EAS631_106053656:6:85:16389:10812	AE000658|TRAV4*01|Homo	43/43 nt	100	43	M94081|TRAJ20*01|Homo	46/46 nt	100	46	CCVLLPRPSNYKLSF	TRA
TCGA-AO-A0J4	Primary Tumor	HWUSI-EAS631_106053656:5:89:9954:13644	AE000658|TRAV4*01|Homo	43/43 nt	100	43	M94081|TRAJ20*01|Homo	46/46 nt	100	46	CCVLLPRPSNYKLSF	TRA
TCGA-LL-A440	Primary Tumor	HWI-ST446:137378071:C1T0PACXX:1:1116:5918:29825	AE000659|TRAV8-6*02|Homo	69/69 nt	100	69	AC023226|TRAJ13*02|Homo	25/27 nt	92.5926	25	CCDFFSGGYQKVTF	TRA
TCGA-LL-A440	Primary Tumor	HWI-ST446:137378071:C1T0PACXX:2:2207:20051:52088	AE000660|TRAV17*01|Homo	27/27 nt	100	27	M94081|TRAJ37*01|Homo	61/61 nt	100	61	CATDPGGSGNTGKLIF	TRA
TCGA-E2-A15I	Primary Tumor	HWI-ST467_110117868:6:64:12073:194938	AE000659|TRAV5*01|Homo	52/52 nt	100	52	M35620|TRAJ40*01|Homo	42/42 nt	100	42	CAESISASGTYKYIF	TRA
TCGA-E2-A15I	Primary Tumor	HWI-ST467_110117868:6:23:21158:96562	AE000660|TRAV36/DV7*01|Homo	41/41 nt	100	41	M94081|TRAJ18*01|Homo	39/39 nt	100	39	CAVEPTRGSTLGRLYF	TRA
TCGA-E2-A15I	Primary Tumor	HWI-ST467_110117868:6:46:11042:94014	AE000659|TRAV8-6*02|Homo	35/35 nt	100	35	M94081|TRAJ43*01|Homo	49/49 nt	100	49	CAVSENNDMRF	TRA
TCGA-E2-A15I	Primary Tumor	HWI-ST467_110117868:6:43:4427:135680	X04954|TRAV13-1*02|Homo	22/22 nt	100	22	M35620|TRAJ40*01|Homo	52/52 nt	100	52	CAASSGTYKYIF	TRA
TCGA-E2-A15I	Primary Tumor	HWI-ST467_110117868:6:4:16175:3148	AE000660|TRAV35*01|Homo	23/23 nt	100	23	M94081|TRAJ37*01|Homo	59/59 nt	100	59	CAGQVVSGNTGKLIF	TRA
TCGA-E2-A15I	Primary Tumor	HWI-ST467_110117868:6:47:20330:118243	AE000659|TRAV14/DV4*02|Homo	49/49 nt	100	49	M94081|TRAJ37*01|Homo	47/47 nt	100	47	CAMRELTGNTGKLIF	TRA
TCGA-E2-A15I	Primary Tumor	HWI-ST467_110117868:6:47:8481:32546	M17650|TRAV8-2*02|Homo	31/31 nt	100	31	M94081|TRAJ30*01|Homo	52/52 nt	100	52	CVPRDDKIIF	TRA
TCGA-E2-A15I	Primary Tumor	HWI-ST467_110117868:6:22:5143:134142	L06886|TRAV26-1*03|Homo	42/42 nt	100	42	M94081|TRAJ26*01|Homo	49/49 nt	100	49	CTIAPTKDNYGQNFVF	TRA
TCGA-E2-A15I	Primary Tumor	HWI-ST467_110117868:6:45:20725:28814	L06886|TRAV26-1*03|Homo	42/42 nt	100	42	M94081|TRAJ26*01|Homo	49/49 nt	100	49	CTIAPTKDNYGQNFVF	TRA
TCGA-E2-A15I	Primary Tumor	HWI-ST467_110117868:6:42:15503:103087	AE000660|TRAV30*01|Homo	47/47 nt	100	47	X05775|TRAJ15*01|Homo	51/51 nt	100	51	CGTPNQAGTALIF	TRA
TCGA-E2-A15I	Primary Tumor	HWI-ST467_110117868:6:24:18973:2986	M17665|TRAV8-4*07|Homo	29/30 nt	96.6667	29	M94081|TRAJ11*01|Homo	58/58 nt	100	58	CAVTFNSGYSTLTF	TRA
TCGA-E2-A15I	Primary Tumor	HWI-ST467_110117868:6:24:18973:2986	X63455|TRAV8-4*05|Homo	24/24 nt	100	24	M94081|TRAJ11*01|Homo	58/58 nt	100	58	CAVTFNSGYSTLTF	TRA
TCGA-E2-A1BC	Primary Tumor	HWI-ST151_110467403:7:46:10391:130248	AE000659|TRAV8-3*01|Homo	66/66 nt	100	66	M35619|TRAJ44*01|Homo	32/32 nt	100	32	CAVGSTGTASKLTF	TRA
TCGA-E2-A1BC	Primary Tumor	HWI-ST151_110467403:7:65:7533:170418	AE000659|TRAV12-2*01|Homo	63/63 nt	100	63	M94081|TRAJ53*01|Homo	41/42 nt	97.619	41	CAVNSGGSNYKLTF	TRA
TCGA-E2-A1BC	Primary Tumor	HWI-ST151_110467403:7:44:15729:153217	AE000660|TRAV29/DV5*01|Homo	50/50 nt	100	50	M35622|TRAJ34*01|Homo	42/42 nt	100	42	CAALGDTDKLIF	TRA
TCGA-E2-A1BC	Primary Tumor	HWI-ST151_110467403:7:1:17412:72249	AE000659|TRAV5*01|Homo	33/34 nt	97.0588	33	M94081|TRAJ39*01|Homo	54/54 nt	100	54	CAESYPRDAGNMLTF	TRA
TCGA-B6-A0RE	Primary Tumor	HWUSI-EAS635_105799830:2:62:9862:5805#0	AE000660|TRAV26-1*01|Homo	55/55 nt	100	55	AF532854|TRAJ32*02|Homo	41/41 nt	100	41	CTIASSESRGGATNKLIF	TRA
TCGA-B6-A0RE	Primary Tumor	HWUSI-EAS635_105799830:1:48:15541:14604#0	AE000660|TRAV27*01|Homo	39/39 nt	100	39	M94081|TRAJ47*01|Homo	54/54 nt	100	54	CAGKYGNKLVF	TRA
TCGA-B6-A0RE	Primary Tumor	HWUSI-EAS635_105799830:1:48:6318:3567#0	AE000658|TRAV1-2*01|Homo	34/35 nt	97.1429	34	M94081|TRAJ26*01|Homo	57/57 nt	100	57	CAVLNNYGQNFVF	TRA
TCGA-A2-A0EM	Primary Tumor	HWI-ST474_105915023:6:8:19681:44396	AE000660|TRAV30*01|Homo	37/37 nt	100	37	M94081|TRAJ8*01|Homo	55/55 nt	100	55	CGTERETGFQKLVF	TRA
TCGA-A2-A04U	Primary Tumor	HWUSI-EAS709_109506617:6:108:7067:1597	AE000658|TRAV1-2*01|Homo	64/65 nt	98.4615	64	M94081|TRAJ33*01|Homo	27/27 nt	100	27	CAVPRMDSNYQLIW	TRA
TCGA-A2-A0YG	Primary Tumor	HWUSI-EAS710_108250660:4:68:5721:5765	Y10410|TRAV6*05|Homo	51/51 nt	100	51	X02885|TRAJ12*01|Homo	43/43 nt	100	43	CAPSMDSSYKLIF	TRA
TCGA-A2-A0YG	Primary Tumor	HWUSI-EAS710_108250660:3:114:1815:968	AE000659|TRAV8-1*01|Homo	31/31 nt	100	31	M94081|TRAJ38*01|Homo	58/58 nt	100	58	CRDPVPHAGNNRKLIW	TRA
TCGA-GM-A2D9	Primary Tumor	HWI-ST442_119206978:7:2107:7568:61771	AE000661|TRAV41*01|Homo	54/55 nt	98.1818	54	M94081|TRAJ43*01|Homo	38/38 nt	100	38	CAAGLNNDMRF	TRA
TCGA-GM-A2D9	Primary Tumor	HWI-ST442_119206978:7:2303:1269:103519	AE000660|TRAV20*01|Homo	33/33 nt	100	33	M94081|TRAJ39*01|Homo	57/57 nt	100	57	CAVQALDNAGNMLTF	TRA
TCGA-GM-A2D9	Primary Tumor	HWI-ST442_119206978:7:1208:17409:128744	AE000660|TRAV20*01|Homo	26/27 nt	96.2963	26	M94081|TRAJ39*01|Homo	56/57 nt	98.2456	56	CAVQALDNAGNMLPF	TRA
TCGA-GM-A2D9	Primary Tumor	HWI-ST442_119206978:7:2207:8223:109964	AE000660|TRAV20*01|Homo	33/33 nt	100	33	M94081|TRAJ39*01|Homo	57/57 nt	100	57	CAVQALDNAGNMLTF	TRA
TCGA-GM-A2D9	Primary Tumor	HWI-ST442_119206978:7:2107:7568:61771	AE000661|TRAV41*01|Homo	54/55 nt	98.1818	54	M94081|TRAJ43*01|Homo	38/38 nt	100	38	CAAGLNNDMRF	TRA
TCGA-GM-A2D9	Primary Tumor	HWI-ST442_119206978:7:2207:8223:109964	AE000660|TRAV20*01|Homo	33/33 nt	100	33	M94081|TRAJ39*01|Homo	57/57 nt	100	57	CAVQALDNAGNMLTF	TRA
TCGA-GM-A2D9	Primary Tumor	HWI-ST442_119206978:7:2303:1269:103519	AE000660|TRAV20*01|Homo	33/33 nt	100	33	M94081|TRAJ39*01|Homo	57/57 nt	100	57	CAVQALDNAGNMLTF	TRA
TCGA-GM-A2D9	Primary Tumor	HWI-ST442_119206978:7:1208:17409:128744	AE000660|TRAV20*01|Homo	26/27 nt	96.2963	26	M94081|TRAJ39*01|Homo	56/57 nt	98.2456	56	CAVQALDNAGNMLPF	TRA
TCGA-EW-A1PA	Primary Tumor	HWI-ST474_116588994:5:1102:16540:98112	AE000659|TRAV6*01|Homo	49/49 nt	100	49	M94081|TRAJ49*01|Homo	50/50 nt	100	50	CALANTGNQFYF	TRA
TCGA-GM-A2DD	Primary Tumor	HWI-ST489_118346118:5:1208:1607:9822	AE000658|TRAV4*01|Homo	72/72 nt	100	72	M94081|TRAJ45*01|Homo	23/23 nt	100	23	CTTASWVTDPGGGADGLTF	TRA
TCGA-GM-A2DD	Primary Tumor	HWI-ST489_118346118:5:1103:11162:104004	AE000659|TRAV6*01|Homo	55/55 nt	100	55	M94081|TRAJ26*01|Homo	42/42 nt	100	42	CRLSYLPLCSYDNYGQNFVF	TRA
TCGA-GM-A2DD	Primary Tumor	HWI-ST489_118346118:5:1202:8290:34847	AE000659|TRAV12-1*01|Homo	57/57 nt	100	57	M94081|TRAJ42*01|Homo	42/43 nt	97.6744	42	CVVYGGSQGNLIF	TRA
TCGA-GM-A2DD	Primary Tumor	HWI-ST489_118346118:5:1203:17753:21668	M17657|TRAV12-1*02|Homo	57/57 nt	100	57	M94081|TRAJ42*01|Homo	43/43 nt	100	43	CVVYGGSQGNLIF	TRA
TCGA-GM-A2DD	Primary Tumor	HWI-ST489_118346118:5:2105:14099:150379	AE000660|TRAV19*01|Homo	76/76 nt	100	76	M94081|TRAJ28*01|Homo	19/19 nt	100	19	CALSEPSAGSYQLTF	TRA
TCGA-GM-A2DD	Primary Tumor	HWI-ST489_118346118:5:1202:18364:21815	AE000660|TRAV19*01|Homo	76/76 nt	100	76	M94081|TRAJ28*01|Homo	19/19 nt	100	19	CALSEPSAGSYQLTF	TRA
TCGA-GM-A2DD	Primary Tumor	HWI-ST489_118346118:5:1308:6471:106147	AE000660|TRAV27*01|Homo	58/59 nt	98.3051	58	M35622|TRAJ34*01|Homo	33/33 nt	100	33	CAGGLDTDKLIF	TRA
TCGA-GM-A2DD	Primary Tumor	HWI-ST489_118346118:5:1201:7198:89498	AE000660|TRAV29/DV5*01|Homo	57/57 nt	100	57	X02886|TRAJ22*01|Homo	38/38 nt	100	38	CAATPSGSARQLTF	TRA
TCGA-GM-A2DD	Primary Tumor	HWI-ST489_118346118:5:1203:5743:89185	AE000659|TRAV9-2*01|Homo	33/33 nt	100	33	M94081|TRAJ52*01|Homo	58/58 nt	100	58	CALSDAGTSYGKLTF	TRA
TCGA-GM-A2DD	Primary Tumor	HWI-ST489_118346118:5:1302:14608:95116	AE000660|TRAV21*01|Homo	36/36 nt	100	36	M94081|TRAJ48*01|Homo	60/60 nt	100	60	CAVFISNFGNEKLTF	TRA
TCGA-GM-A2DD	Primary Tumor	HWI-ST489_118346118:5:1204:12824:134584	AE000660|TRAV21*01|Homo	36/36 nt	100	36	M94081|TRAJ48*01|Homo	60/60 nt	100	60	CAVFISNFGNEKLTF	TRA
TCGA-GM-A2DD	Primary Tumor	HWI-ST489_118346118:5:1204:12824:134584	AE000660|TRAV21*01|Homo	38/38 nt	100	38	M94081|TRAJ48*01|Homo	58/58 nt	100	58	CAVFISNFGNEKLTF	TRA
TCGA-GM-A2DD	Primary Tumor	HWI-ST489_118346118:5:1302:14608:95116	AE000660|TRAV21*01|Homo	38/38 nt	100	38	M94081|TRAJ48*01|Homo	58/58 nt	100	58	CAVFISNFGNEKLTF	TRA
TCGA-GM-A2DD	Primary Tumor	HWI-ST489_118346118:5:2208:19812:43470	M17657|TRAV12-1*02|Homo	53/57 nt	92.9825	53	M94081|TRAJ42*01|Homo	42/43 nt	97.6744	42	CVVYGGSQGKLIF	TRA
TCGA-GM-A2DD	Primary Tumor	HWI-ST489_118346118:5:2101:21108:73736	X04946|TRAV12-2*03|Homo	28/28 nt	100	28	M94081|TRAJ38*01|Homo	53/53 nt	100	53	CAVANNRKLIW	TRA
TCGA-GM-A2DD	Primary Tumor	HWI-ST489_118346118:5:1201:14951:57597	X04946|TRAV12-2*03|Homo	28/28 nt	100	28	M94081|TRAJ38*01|Homo	53/53 nt	100	53	CAVANNRKLIW	TRA
TCGA-GM-A2DD	Primary Tumor	HWI-ST489_118346118:5:1208:8719:26209	X04946|TRAV12-2*03|Homo	28/28 nt	100	28	M94081|TRAJ38*01|Homo	53/53 nt	100	53	CAVANNRKLIW	TRA
TCGA-GM-A2DD	Primary Tumor	HWI-ST489_118346118:5:1302:18062:196154	X04946|TRAV12-2*03|Homo	28/28 nt	100	28	M94081|TRAJ38*01|Homo	53/53 nt	100	53	CAVANNRKLIW	TRA
TCGA-GM-A2DD	Primary Tumor	HWI-ST489_118346118:5:1301:12095:98160	AE000659|TRAV8-3*01|Homo	29/29 nt	100	29	AJ007774|TRAJ37*02|Homo	59/59 nt	100	59	CAVGPSSNTGKLIF	TRA
TCGA-GM-A2DD	Primary Tumor	HWI-ST489_118346118:5:1306:7571:24407	AE000659|TRAV8-3*01|Homo	29/29 nt	100	29	AJ007774|TRAJ37*02|Homo	59/59 nt	100	59	CAVGPSSNTGKLIF	TRA
TCGA-GM-A2DD	Primary Tumor	HWI-ST489_118346118:5:2107:8490:145389	AE000659|TRAV8-3*01|Homo	29/29 nt	100	29	AJ007774|TRAJ37*02|Homo	59/59 nt	100	59	CAVGPSSNTGKLIF	TRA
TCGA-GM-A2DD	Primary Tumor	HWI-ST489_118346118:5:2206:20546:150909	AE000659|TRAV8-3*01|Homo	29/29 nt	100	29	AJ007774|TRAJ37*02|Homo	59/59 nt	100	59	CAVGPSSNTGKLIF	TRA
TCGA-GM-A2DD	Primary Tumor	HWI-ST489_118346118:5:2304:5956:142655	AE000659|TRAV14/DV4*02|Homo	38/38 nt	100	38	M94081|TRAJ27*01|Homo	56/56 nt	100	56	CAMREATNAGKSTF	TRA
TCGA-BH-A0EE	Primary Tumor	HWUSI-EAS1567_105611432:1:109:11656:14788	AE000660|TRAV29/DV5*01|Homo	71/71 nt	100	71	M94081|TRAJ48*01|Homo	27/27 nt	100	27	CTSVQQASFGNEKLTF	TRA
TCGA-BH-A0EE	Primary Tumor	HWUSI-EAS1567_105611432:1:16:6619:12336	AE000660|TRAV26-2*01|Homo	71/71 nt	100	71	M94081|TRAJ27*01|Homo	26/26 nt	100	26	CILRDETNAGKSTF	TRA
TCGA-BH-A0EE	Primary Tumor	HWUSI-EAS1567_105611432:1:112:11896:16637	AE000660|TRAV26-2*01|Homo	31/31 nt	100	31	M94081|TRAJ56*01|Homo	58/58 nt	100	58	CCCVLLHPTGANSKLTF	TRA
TCGA-BH-A0EE	Primary Tumor	HWUSI-EAS1567_105611432:2:43:10389:4355	AE000661|TRAV38-2/DV8*01|Homo	28/28 nt	100	28	M94081|TRAJ54*01|Homo	59/59 nt	100	59	CASTIQGAQKLVF	TRA
TCGA-BH-A0EE	Primary Tumor	HWUSI-EAS1567_105611432:1:81:9300:7696	AE000660|TRAV27*01|Homo	33/33 nt	100	33	M94081|TRAJ45*01|Homo	59/59 nt	100	59	CAGARRYSGGGADGLTF	TRA
TCGA-BH-A0EE	Primary Tumor	HWUSI-EAS1567_105611432:2:100:4420:13226	AE000660|TRAV27*01|Homo	33/33 nt	100	33	M94081|TRAJ45*01|Homo	58/59 nt	98.3051	58	CAGARRYSGGGADGLTF	TRA
TCGA-BH-A0EE	Primary Tumor	HWUSI-EAS1567_105611432:1:65:14602:20097	AE000659|TRAV8-6*02|Homo	42/42 nt	100	42	M94081|TRAJ45*01|Homo	51/51 nt	100	51	CAVSGLSGGGADGLTF	TRA
TCGA-BH-A0EE	Primary Tumor	HWUSI-EAS1567_105611432:2:18:19618:4870	X04946|TRAV12-2*03|Homo	37/37 nt	100	37	M35619|TRAJ44*01|Homo	57/57 nt	100	57	CAVIRINTGTASKLTF	TRA
TCGA-BH-A0EE	Primary Tumor	HWUSI-EAS1567_105611432:1:94:16138:10510	AE000659|TRAV14/DV4*02|Homo	38/38 nt	100	38	M94081|TRAJ43*01|Homo	44/44 nt	100	44	CNERCGDMRF	TRA
TCGA-BH-A0EE	Primary Tumor	HWUSI-EAS1567_105611432:2:89:14831:15241	X04954|TRAV13-1*02|Homo	32/32 nt	100	32	M14905|TRAJ31*01|Homo	55/56 nt	98.2143	55	CAPRGKNNARLMF	TRA
TCGA-BH-A0EE	Primary Tumor	HWUSI-EAS1567_105611432:2:18:16641:3963	X04946|TRAV12-2*03|Homo	31/32 nt	96.875	31	M94081|TRAJ28*01|Homo	58/58 nt	100	58	CAAGAGSYQLTF	TRA
TCGA-BH-A0EE	Primary Tumor	HWUSI-EAS1567_105611432:1:93:10253:2216	AE000659|TRAV5*01|Homo	21/23 nt	91.3043	21	X05773|TRAJ17*01|Homo	56/56 nt	100	56	CATRAAGNKLTF	TRA
TCGA-BH-A0DL	Primary Tumor	HWI-ST434_109457553:8:24:2527:9839	AE000658|TRAV1-2*01|Homo	60/60 nt	100	60	M94081|TRAJ26*01|Homo	34/34 nt	100	34	CLLPLCCERSGNYGQNFVF	TRA
TCGA-BH-A0DL	Primary Tumor	HWI-ST434_109457553:8:24:2527:9839	AE000658|TRAV1-2*01|Homo	58/58 nt	100	58	M94081|TRAJ26*01|Homo	36/36 nt	100	36	CLLPLCCERSGNYGQNFVF	TRA
TCGA-BH-A0DL	Primary Tumor	HWI-ST434_109457553:8:1:6302:140772	AE000659|TRAV6*01|Homo	73/73 nt	100	73	M35622|TRAJ34*01|Homo	24/24 nt	100	24	CALDDNTDKLIF	TRA
TCGA-BH-A0DL	Primary Tumor	HWI-ST434_109457553:8:45:18161:97695	AE000660|TRAV19*01|Homo	57/57 nt	100	57	X02886|TRAJ22*01|Homo	41/41 nt	100	41	CALSEGGSARQLTF	TRA
TCGA-BH-A0DL	Primary Tumor	HWI-ST434_109457553:8:63:19609:29800	AE000660|TRAV23/DV6*01|Homo	65/66 nt	98.4848	65	M94081|TRAJ39*01|Homo	27/27 nt	100	27	CAARRNNAGNMLTF	TRA
TCGA-BH-A0DL	Primary Tumor	HWI-ST434_109457553:8:41:21011:127146	AE000660|TRAV26-1*01|Homo	65/65 nt	100	65	M94081|TRAJ53*01|Homo	28/28 nt	100	28	CIDTSNSGGSNYKLTF	TRA
TCGA-BH-A0DL	Primary Tumor	HWI-ST434_109457553:8:64:20287:156966	AE000661|TRAV38-2/DV8*01|Homo	55/56 nt	98.2143	55	M94081|TRAJ50*01|Homo	42/42 nt	100	42	CISVLMGMKTSYDKVIF	TRA
TCGA-BH-A0DL	Primary Tumor	HWI-ST434_109457553:8:45:7414:195126	AE000661|TRAV39*01|Homo	76/76 nt	100	76	M94081|TRAJ30*01|Homo	23/23 nt	100	23	CAANRDDKIIF	TRA
TCGA-BH-A0DL	Primary Tumor	HWI-ST434_109457553:8:22:6898:130035	AE000660|TRAV22*01|Homo	21/21 nt	100	21	M94081|TRAJ57*01|Homo	59/59 nt	100	59	CAGQGGSEKLVF	TRA
TCGA-BH-A0DL	Primary Tumor	HWI-ST434_109457553:8:43:10194:138436	M12423|TRAV8-4*02|Homo	34/34 nt	100	34	M94081|TRAJ54*01|Homo	59/59 nt	100	59	CAVSAEIQGAQKLVF	TRA
TCGA-BH-A0DL	Primary Tumor	HWI-ST434_109457553:8:41:21011:127146	M27371|TRAV26-1*02|Homo	22/22 nt	100	22	M94081|TRAJ53*01|Homo	65/65 nt	100	65	CIDTSNSGGSNYKLTF	TRA
TCGA-BH-A0DL	Primary Tumor	HWI-ST434_109457553:8:23:10587:72306	M27371|TRAV26-1*02|Homo	27/28 nt	96.4286	27	M94081|TRAJ43*01|Homo	44/44 nt	100	44	CIVRVGDMRF	TRA
TCGA-BH-A0DL	Primary Tumor	HWI-ST434_109457553:8:5:6353:94261	AE000660|TRAV27*01|Homo	23/23 nt	100	23	AJ007774|TRAJ37*02|Homo	60/60 nt	100	60	CAGARSSSNTGKLIF	TRA
TCGA-BH-A0DL	Primary Tumor	HWI-ST434_109457553:8:24:14663:105053	AE000659|TRAV12-1*01|Homo	32/32 nt	100	32	M94081|TRAJ36*01|Homo	52/52 nt	100	52	CGEQEAGANNLFF	TRA
TCGA-BH-A0DL	Primary Tumor	HWI-ST434_109457553:8:24:14663:105053	M17657|TRAV12-1*02|Homo	32/32 nt	100	32	M94081|TRAJ36*01|Homo	52/52 nt	100	52	CGEQEAGANNLFF	TRA
TCGA-BH-A0DL	Primary Tumor	HWI-ST434_109457553:8:6:12318:190887	X04946|TRAV12-2*03|Homo	38/38 nt	100	38	M94081|TRAJ30*01|Homo	56/57 nt	98.2456	56	CAVKRDDKIIF	TRA
TCGA-BH-A0DL	Primary Tumor	HWI-ST434_109457553:8:4:11711:111198	M17656|TRAV12-3*02|Homo	22/22 nt	100	22	M94081|TRAJ20*01|Homo	54/54 nt	100	54	CAMRANDYKLSF	TRA
TCGA-A2-A1FW	Primary Tumor	HWI-ST735_114204827:2:2207:12142:12518	AE000659|TRAV6*01|Homo	62/62 nt	100	62	M94081|TRAJ37*01|Homo	34/35 nt	97.1429	34	CALRLGNTGKLIF	TRA
TCGA-A2-A1FW	Primary Tumor	HWI-ST482_114177105:5:1106:12084:94981	AE000659|TRAV6*01|Homo	62/62 nt	100	62	M94081|TRAJ37*01|Homo	34/35 nt	97.1429	34	CALRLGNTGKLIF	TRA
TCGA-A2-A1FW	Primary Tumor	HWI-ST735_114204827:2:2205:7717:106909	AE000659|TRAV6*01|Homo	62/62 nt	100	62	M94081|TRAJ37*01|Homo	34/35 nt	97.1429	34	CALRLGNTGKLIF	TRA
TCGA-E9-A6HE	Primary Tumor	HWI-ST485:143085963:C2CDLACXX:8:2302:3582:25948	AE000660|TRAV35*01|Homo	57/57 nt	100	57	M94081|TRAJ58*01|Homo	42/42 nt	100	42	CAGPETSGSRLTF	TRA
TCGA-E9-A6HE	Primary Tumor	HWI-ST485:143085963:C2CDLACXX:8:2209:13191:3051	AE000660|TRAV22*01|Homo	31/31 nt	100	31	M94081|TRAJ48*01|Homo	57/57 nt	100	57	CCPHFGNEKLTF	TRA
TCGA-D8-A145	Primary Tumor	HWUSI-EAS575_108808500:1:62:11269:7986#0	AE000660|TRAV19*01|Homo	48/48 nt	100	48	AJ007774|TRAJ37*02|Homo	40/40 nt	100	40	CALSEAGSIDSSNTGKLIF	TRA
TCGA-D8-A145	Primary Tumor	HWUSI-EAS575_108808500:2:68:11495:1865#0	AE000660|TRAV26-2*01|Homo	42/43 nt	97.6744	42	M94081|TRAJ42*01|Homo	52/52 nt	100	52	CILRDRSNYGGSQGNLIF	TRA
TCGA-D8-A145	Primary Tumor	HWUSI-EAS575_108808500:1:20:10568:935#0	AE000658|TRAV3*01|Homo	43/44 nt	97.7273	43	M94081|TRAJ28*01|Homo	49/50 nt	98	49	CYERPDSGAGSYQLTF	TRA
TCGA-D8-A27M	Primary Tumor	HWI-ST718_114371741:7:1107:15130:186962	AE000659|TRAV8-6*02|Homo	68/70 nt	97.1429	68	M94081|TRAJ8*01|Homo	27/28 nt	96.4286	27	CAVRLNPGFQKLVF	TRA
TCGA-D8-A27M	Primary Tumor	HWI-ST718_114371741:7:2201:5156:152799	AE000659|TRAV8-6*02|Homo	70/70 nt	100	70	M94081|TRAJ8*01|Homo	28/28 nt	100	28	CAVRLNTGFQKLVF	TRA
TCGA-D8-A27M	Primary Tumor	HWI-ST718_114371741:7:1306:3677:58006	AE000660|TRAV35*01|Homo	93/94 nt	98.9362	93	X58763|TRAJ23*02|Homo	19/21 nt	90.4762	19	CSVWYNQEGQLIF	TRA
TCGA-D8-A27M	Primary Tumor	HWI-ST718_114371741:7:1103:7230:51360	AE000658|TRAV1-2*01|Homo	34/34 nt	100	34	X05775|TRAJ15*01|Homo	58/58 nt	100	58	CAVRARWNQAGTALIF	TRA
TCGA-D8-A27M	Primary Tumor	HWI-ST718_114371741:7:2207:6961:182934	M17658|TRAV13-2*02|Homo	32/32 nt	100	32	M94081|TRAJ8*01|Homo	56/56 nt	100	56	CAETPLVTGFQKLVF	TRA
TCGA-B6-A401	Primary Tumor	HWI-ST495:137338861:C1V14ACXX:2:2215:3851:17652	AE000658|TRAV1-2*01|Homo	66/66 nt	100	66	M14905|TRAJ31*01|Homo	32/32 nt	100	32	CAVRGNNNARLMF	TRA
TCGA-B6-A401	Primary Tumor	HWI-ST495:137338861:C1V14ACXX:1:2102:5914:59073	AE000660|TRAV17*01|Homo	74/74 nt	100	74	X05775|TRAJ15*01|Homo	20/20 nt	100	20	CFLLLCYGYQNQAGTALIF	TRA
TCGA-B6-A401	Primary Tumor	HWI-ST495:137338861:C1V14ACXX:2:2212:10628:86125	AE000658|TRAV4*01|Homo	30/30 nt	100	30	M94081|TRAJ45*01|Homo	60/60 nt	100	60	CTTASWAPGGGADGLTF	TRA
TCGA-B6-A401	Primary Tumor	HWI-ST495:137338861:C1V14ACXX:2:2114:20868:71772	AE000660|TRAV19*01|Homo	27/27 nt	100	27	M94081|TRAJ39*01|Homo	57/57 nt	100	57	CALLDNAGNMLTF	TRA
TCGA-B6-A401	Primary Tumor	HWI-ST495:137338861:C1V14ACXX:1:2102:5914:59073	AE000660|TRAV17*01|Homo	28/28 nt	100	28	X05775|TRAJ15*01|Homo	58/58 nt	100	58	CFLLLCYGYQNQAGTALIF	TRA
TCGA-A8-A07R	Primary Tumor	HWI-ST791_110417687:6:41:13661:164630	AE000658|TRAV1-2*01|Homo	30/30 nt	100	30	X05775|TRAJ15*01|Homo	55/55 nt	100	55	CAVISRQAGTALIF	TRA
TCGA-BH-A0HF	Primary Tumor	HWUSI-EAS1568_105896089:1:46:3743:12325	AE000659|TRAV13-1*01|Homo	64/64 nt	100	64	X02886|TRAJ22*01|Homo	34/34 nt	100	34	CLLLCSMSGSARQLTF	TRA
TCGA-BH-A0HF	Primary Tumor	HWUSI-EAS1568_105896089:3:14:14782:4684	AE000659|TRAV13-1*01|Homo	64/64 nt	100	64	X02886|TRAJ22*01|Homo	34/34 nt	100	34	CLLLCSMSGSARQLTF	TRA
TCGA-BH-A0HF	Primary Tumor	HWUSI-EAS1568_105896089:1:59:3105:4727	AE000659|TRAV12-2*01|Homo	58/58 nt	100	58	X02885|TRAJ12*01|Homo	41/41 nt	100	41	CAVGMDSSYKLIF	TRA
TCGA-BH-A0HF	Primary Tumor	HWUSI-EAS1568_105896089:1:80:11774:8914	AE000659|TRAV12-2*01|Homo	58/58 nt	100	58	X02885|TRAJ12*01|Homo	41/41 nt	100	41	CAVGMDSSYKLIF	TRA
TCGA-BH-A0HF	Primary Tumor	HWUSI-EAS1568_105896089:2:53:9583:18673	M21626|TRAV14/DV4*01|Homo	49/49 nt	100	49	M94081|TRAJ45*01|Homo	49/49 nt	100	49	CAMREGPGGGADGLTF	TRA
TCGA-BH-A0HF	Primary Tumor	HWUSI-EAS713_105717081:2:4:2822:20775	M21626|TRAV14/DV4*01|Homo	49/49 nt	100	49	M94081|TRAJ45*01|Homo	49/49 nt	100	49	CAMREGPGGGADGLTF	TRA
TCGA-AN-A0FN	Primary Tumor	HWUSI-EAS635_105478298:6:108:1098:14399	AE000658|TRAV4*01|Homo	70/71 nt	98.5915	70	X02884|TRAJ3*01|Homo	25/25 nt	100	25	CTTASWVTRSSASKIIF	TRA
TCGA-AN-A0FN	Primary Tumor	HWUSI-EAS635_105478298:5:81:11583:19619	X04946|TRAV12-2*03|Homo	64/64 nt	100	64	M94081|TRAJ9*01|Homo	35/35 nt	100	35	CAVNTGGFKTIF	TRA
TCGA-AN-A0FN	Primary Tumor	HWUSI-EAS635_105478298:5:3:8640:9096	M17656|TRAV12-3*02|Homo	74/74 nt	100	74	X05775|TRAJ15*01|Homo	22/22 nt	100	22	CAILNQAGTALIF	TRA
TCGA-AN-A0FN	Primary Tumor	HWUSI-EAS635_105478298:6:103:5776:2556	AE000660|TRAV19*01|Homo	69/69 nt	100	69	M94081|TRAJ43*01|Homo	26/26 nt	100	26	CALSEAKYNNNDMRF	TRA
TCGA-AN-A0FN	Primary Tumor	HWUSI-EAS635_105478298:6:61:14385:13519	AE000660|TRAV20*01|Homo	70/71 nt	98.5915	70	AC023226|TRAJ13*02|Homo	29/29 nt	100	29	CAVRGGYQKVTF	TRA
TCGA-AN-A0FN	Primary Tumor	HWUSI-EAS635_105478298:5:91:7840:2352	AE000660|TRAV29/DV5*01|Homo	65/65 nt	100	65	M94081|TRAJ29*01|Homo	31/31 nt	100	31	CAAPSGNTPLVF	TRA
TCGA-AN-A0FN	Primary Tumor	HWUSI-EAS635_105478298:5:45:18534:14696	AE000660|TRAV27*01|Homo	48/48 nt	100	48	M94081|TRAJ53*01|Homo	50/50 nt	100	50	CAGDGSNYKLTF	TRA
TCGA-AN-A0FN	Primary Tumor	HWUSI-EAS635_105478298:6:107:13093:8108	AE000659|TRAV8-1*01|Homo	21/22 nt	95.4545	21	M35620|TRAJ40*01|Homo	55/55 nt	100	55	CAVKFSGTYKYIF	TRA
TCGA-AN-A0FN	Primary Tumor	HWUSI-EAS635_105478298:6:81:11075:9455	AE000660|TRAV21*01|Homo	21/21 nt	100	21	AJ007774|TRAJ37*02|Homo	61/61 nt	100	61	CAVILSGSSNTGKLIF	TRA
TCGA-AN-A0FN	Primary Tumor	HWUSI-EAS635_105478298:6:110:6745:14350	AE000660|TRAV22*01|Homo	39/39 nt	100	39	M94081|TRAJ27*01|Homo	50/50 nt	100	50	CAPTPDTNAGKSTF	TRA
TCGA-AN-A0FN	Primary Tumor	HWUSI-EAS635_105478298:5:40:4805:18542	AE000658|TRAV3*01|Homo	27/27 nt	100	27	M94081|TRAJ27*01|Homo	55/55 nt	100	55	CAVRDETNAGKSTF	TRA
TCGA-E9-A248	Primary Tumor	HWI-ST144_115992511:4:2105:8020:6680	AE000659|TRAV8-2*01|Homo	65/65 nt	100	65	M94081|TRAJ45*01|Homo	33/33 nt	100	33	CVVSVSGGGADGLTF	TRA
TCGA-E9-A248	Primary Tumor	HWI-ST144_115992511:4:2104:8519:185484	AE000659|TRAV9-2*01|Homo	56/56 nt	100	56	M94081|TRAJ33*01|Homo	32/32 nt	100	32	CALDFIRDSNYQLIW	TRA
TCGA-E9-A248	Primary Tumor	HWI-ST144_115992511:4:2105:15306:116478	AE000659|TRAV16*01|Homo	58/58 nt	100	58	M94081|TRAJ23*01|Homo	40/40 nt	100	40	CAPNQGGKLIF	TRA
TCGA-E9-A248	Primary Tumor	HWI-ST144_115992511:4:2304:4061:76805	M17658|TRAV13-2*02|Homo	44/44 nt	100	44	M94081|TRAJ58*01|Homo	53/53 nt	100	53	CAEIKETSGSRLTF	TRA
TCGA-E9-A248	Primary Tumor	HWI-ST144_115992511:4:1203:18084:150494	AE000659|TRAV13-2*01|Homo	45/47 nt	95.7447	45	M94081|TRAJ58*01|Homo	54/56 nt	96.4286	54	CAEIKEPSGSRLTF	TRA
TCGA-E9-A248	Primary Tumor	HWI-ST144_115992511:4:2104:10137:96569	AE000658|TRAV3*01|Homo	36/36 nt	100	36	M94081|TRAJ27*01|Homo	56/56 nt	100	56	CCERPPTNAGKSTF	TRA
TCGA-E9-A248	Primary Tumor	HWI-ST144_115992511:4:2208:7560:152986	AE000658|TRAV3*01|Homo	36/36 nt	100	36	M94081|TRAJ27*01|Homo	56/56 nt	100	56	CCERPPTNAGKSTF	TRA
TCGA-E9-A248	Primary Tumor	HWI-ST144_115992511:4:1303:19782:60528	AE000659|TRAV5*01|Homo	45/45 nt	100	45	M94081|TRAJ10*01|Homo	50/50 nt	100	50	CAETPILTGGGNKLTF	TRA
TCGA-D8-A27E	Primary Tumor	HWI-ST444_116124287:6:2207:10103:158602	AE000660|TRAV17*01|Homo	54/55 nt	98.1818	54	M94081|TRAJ56*01|Homo	39/40 nt	97.5	39	CATGPTGANSKLTF	TRA
TCGA-D8-A27E	Primary Tumor	HWI-ST444_116124287:6:1203:15086:93833	AE000660|TRAV21*01|Homo	36/36 nt	100	36	M94081|TRAJ38*01|Homo	49/50 nt	98	49	CAVNPPRGNAGNNRKLIW	TRA
TCGA-D8-A27E	Primary Tumor	HWI-ST444_116124287:6:2204:16564:96181	AE000660|TRAV21*01|Homo	36/36 nt	100	36	M94081|TRAJ38*01|Homo	50/50 nt	100	50	CAVNPPRGNAGNNRKLIW	TRA
TCGA-D8-A27E	Primary Tumor	HWI-ST444_116124287:6:1307:8353:38044	AE000658|TRAV3*01|Homo	37/37 nt	100	37	M94081|TRAJ23*01|Homo	54/54 nt	100	54	CCESLLPYNQGGKLIF	TRA
TCGA-D8-A27E	Primary Tumor	HWI-ST444_116124287:6:1305:21251:10949	X04946|TRAV12-2*03|Homo	34/34 nt	100	34	X05773|TRAJ17*01|Homo	55/55 nt	100	55	CAVSQRAAGNKLTF	TRA
TCGA-D8-A27E	Primary Tumor	HWI-ST444_116124287:6:1102:4881:138454	X04946|TRAV12-2*03|Homo	34/34 nt	100	34	X05773|TRAJ17*01|Homo	55/55 nt	100	55	CAVSQRAAGNKLTF	TRA
TCGA-D8-A27E	Primary Tumor	HWI-ST444_116124287:6:2204:17691:16060	X04946|TRAV12-2*03|Homo	34/34 nt	100	34	X05773|TRAJ17*01|Homo	55/55 nt	100	55	CAVSQRAAGNKLTF	TRA
TCGA-BH-A0DQ	Primary Tumor	HWUSI-EAS1612_107353572:1:93:14844:3547	AE000659|TRAV5*01|Homo	80/80 nt	100	80	M94081|TRAJ9*01|Homo	19/19 nt	100	19	CREYNTGGFKTIF	TRA
TCGA-BH-A0DQ	Primary Tumor	HWUSI-EAS1612_107353572:1:102:19682:10374	AE000661|TRAV38-2/DV8*01|Homo	70/70 nt	100	70	M35620|TRAJ40*01|Homo	21/22 nt	95.4545	21	CAYSAFTSGTSKYIF	TRA
TCGA-E2-A14N	Primary Tumor	HWI-ST467_110117868:4:48:5516:145332	AE000659|TRAV8-1*01|Homo	61/61 nt	100	61	X02884|TRAJ3*01|Homo	30/30 nt	100	30	CAVNSAVSASKIIF	TRA
TCGA-E2-A14N	Primary Tumor	HWI-ST467_110117868:4:62:1687:155550	AE000659|TRAV12-1*01|Homo	58/58 nt	100	58	M94081|TRAJ10*01|Homo	36/36 nt	100	36	CVVSALTGGGNKLTF	TRA
TCGA-E2-A14N	Primary Tumor	HWI-ST467_110117868:4:6:14632:197228	AE000659|TRAV8-3*01|Homo	73/74 nt	98.6486	73	X02885|TRAJ12*01|Homo	23/23 nt	100	23	CAVVRRDSSYKLIF	TRA
TCGA-E2-A14N	Primary Tumor	HWI-ST467_110117868:4:48:20851:105462	AE000659|TRAV13-2*01|Homo	75/75 nt	100	75	M94081|TRAJ50*01|Homo	22/22 nt	100	22	CLLLCRESPSYDKVIF	TRA
TCGA-E2-A14N	Primary Tumor	HWI-ST467_110117868:4:6:13523:168549	AE000660|TRAV19*01|Homo	75/75 nt	100	75	M94081|TRAJ5*01|Homo	23/23 nt	100	23	CALSWDTGRRALTF	TRA
TCGA-E2-A14N	Primary Tumor	HWI-ST467_110117868:4:46:12874:168064	AE000660|TRAV19*01|Homo	70/70 nt	100	70	M94081|TRAJ39*01|Homo	26/27 nt	96.2963	26	CSPINAGNMLTF	TRA
TCGA-E2-A14N	Primary Tumor	HWI-ST467_110117868:4:45:1700:115832	AE000660|TRAV19*01|Homo	73/73 nt	100	73	M94081|TRAJ5*01|Homo	24/25 nt	96	24	CALSWDTGRRALTF	TRA
TCGA-E2-A14N	Primary Tumor	HWI-ST467_110117868:4:66:15942:42626	AE000660|TRAV19*01|Homo	71/71 nt	100	71	M94081|TRAJ5*01|Homo	27/27 nt	100	27	CALSWDTGRRALTF	TRA
TCGA-E2-A14N	Primary Tumor	HWI-ST467_110117868:4:43:14807:189980	AE000660|TRAV20*01|Homo	50/50 nt	100	50	M94081|TRAJ32*01|Homo	43/43 nt	100	43	CRSKGATNKLIF	TRA
TCGA-E2-A14N	Primary Tumor	HWI-ST467_110117868:4:44:16316:132626	AE000660|TRAV27*01|Homo	67/68 nt	98.5294	67	M94081|TRAJ37*01|Homo	27/27 nt	100	27	CRREAGNTGKLIF	TRA
TCGA-E2-A14N	Primary Tumor	HWI-ST467_110117868:4:46:5278:97635	AE000660|TRAV27*01|Homo	65/68 nt	95.5882	65	M94081|TRAJ37*01|Homo	27/27 nt	100	27	CRREAGNTGKLIF	TRA
TCGA-E2-A14N	Primary Tumor	HWI-ST467_110117868:4:28:1741:75620	AE000660|TRAV29/DV5*01|Homo	65/65 nt	100	65	M94081|TRAJ42*01|Homo	25/25 nt	100	25	CAASAFGRGSQGNLIF	TRA
TCGA-E2-A14N	Primary Tumor	HWI-ST467_110117868:4:7:11831:119111	AE000660|TRAV26-2*01|Homo	71/71 nt	100	71	M94081|TRAJ50*01|Homo	21/21 nt	100	21	CIPQGTSYDKVIF	TRA
TCGA-E2-A14N	Primary Tumor	HWI-ST467_110117868:4:7:17620:22378	AE000660|TRAV35*01|Homo	76/76 nt	100	76	M94081|TRAJ26*01|Homo	21/21 nt	100	21	CAGQRGQNFVF	TRA
TCGA-E2-A14N	Primary Tumor	HWI-ST467_110117868:4:21:12719:18557	AE000660|TRAV35*01|Homo	59/59 nt	100	59	M94081|TRAJ20*01|Homo	36/36 nt	100	36	CAGRDDYKLSF	TRA
TCGA-E2-A14N	Primary Tumor	HWI-ST467_110117868:4:21:12183:77975	AE000661|TRAV39*01|Homo	65/65 nt	100	65	M94081|TRAJ58*01|Homo	27/27 nt	100	27	CAVDTIWETSGSRLTF	TRA
TCGA-E2-A14N	Primary Tumor	HWI-ST467_110117868:4:67:12375:178630	AE000659|TRAV8-2*01|Homo	30/30 nt	100	30	M94081|TRAJ36*01|Homo	58/58 nt	100	58	CVVRLQTGANNLFF	TRA
TCGA-E2-A14N	Primary Tumor	HWI-ST467_110117868:4:26:13893:111751	AE000659|TRAV8-1*01|Homo	33/33 nt	100	33	M94081|TRAJ36*01|Homo	54/54 nt	100	54	CAVSPSRAGANNLFF	TRA
TCGA-E2-A14N	Primary Tumor	HWI-ST467_110117868:4:44:3195:139946	AE000659|TRAV8-1*01|Homo	32/33 nt	96.9697	32	M94081|TRAJ36*01|Homo	53/54 nt	98.1481	53	CAVSPSRAGANNLFF	TRA
TCGA-E2-A14N	Primary Tumor	HWI-ST467_110117868:4:41:13978:67116	AE000660|TRAV21*01|Homo	22/22 nt	100	22	M35622|TRAJ34*01|Homo	51/51 nt	100	51	CCSLPHTGDTDKLIF	TRA
TCGA-E2-A14N	Primary Tumor	HWI-ST467_110117868:4:41:13978:67116	AE000660|TRAV21*01|Homo	34/34 nt	100	34	M35622|TRAJ34*01|Homo	47/47 nt	100	47	CCSLPHTGDTDKLIF	TRA
TCGA-E2-A14N	Primary Tumor	HWI-ST467_110117868:4:62:13619:132809	AE000658|TRAV1-2*01|Homo	20/20 nt	100	20	M94081|TRAJ33*01|Homo	57/57 nt	100	57	CAVMDSNYQLIW	TRA
TCGA-E2-A14N	Primary Tumor	HWI-ST467_110117868:4:7:9426:110482	AE000659|TRAV5*01|Homo	51/53 nt	96.2264	51	M94081|TRAJ29*01|Homo	48/48 nt	100	48	CAGAGNTPLVF	TRA
TCGA-E2-A14N	Primary Tumor	HWI-ST467_110117868:4:64:14506:153691	AE000660|TRAV29/DV5*01|Homo	39/39 nt	100	39	M94081|TRAJ26*01|Homo	51/51 nt	100	51	CAASAFRGYGQNFVF	TRA
TCGA-E2-A14N	Primary Tumor	HWI-ST467_110117868:4:67:9932:26780	AE000660|TRAV29/DV5*01|Homo	39/39 nt	100	39	M94081|TRAJ26*01|Homo	51/51 nt	100	51	CAASAFRGYGQNFVF	TRA
TCGA-E2-A14N	Primary Tumor	HWI-ST467_110117868:4:24:15359:92690	AE000659|TRAV16*01|Homo	19/19 nt	100	19	M94081|TRAJ23*01|Homo	55/55 nt	100	55	CALSGRNQGGKLIF	TRA
TCGA-E2-A14N	Primary Tumor	HWI-ST467_110117868:4:22:1957:113502	AE000659|TRAV12-1*01|Homo	30/30 nt	100	30	M94081|TRAJ21*01|Homo	54/54 nt	100	54	CVVRARDNFNKFYF	TRA
TCGA-E2-A14N	Primary Tumor	HWI-ST467_110117868:4:25:8157:61869	M17657|TRAV12-1*02|Homo	38/38 nt	100	38	M94081|TRAJ8*01|Homo	60/63 nt	95.2381	60	CVVNSRGFQKLVF	TRA
TCGA-E2-A14N	Primary Tumor	HWI-ST467_110117868:4:26:6347:140515	M35617|TRAV8-3*02|Homo	26/26 nt	100	26	M94081|TRAJ5*01|Homo	56/56 nt	100	56	CAVVLTGRRALTF	TRA
TCGA-E2-A14N	Primary Tumor	HWI-ST467_110117868:4:48:16722:77933	M35617|TRAV8-3*02|Homo	26/26 nt	100	26	M94081|TRAJ5*01|Homo	56/56 nt	100	56	CAVVLTGRRALTF	TRA
TCGA-A8-A099	Primary Tumor	HWUSI-EAS667_104454668:8:100:4664:18633	M27371|TRAV26-1*02|Homo	20/20 nt	100	20	M94081|TRAJ54*01|Homo	60/60 nt	100	60	CIVTLNLIQGAQKLVF	TRA
TCGA-A8-A099	Primary Tumor	HWUSI-EAS667_104454668:7:120:12806:12161	M27371|TRAV26-1*02|Homo	20/20 nt	100	20	M94081|TRAJ54*01|Homo	60/60 nt	100	60	CIVTLNLIQGAQKLVF	TRA
TCGA-GM-A2DN	Primary Tumor	HWI-ST718_118408391:3:1107:10237:46498	AE000658|TRAV1-2*01|Homo	60/61 nt	98.3607	60	M35620|TRAJ40*01|Homo	36/36 nt	100	36	CAGHSSGTYKYIF	TRA
TCGA-GM-A2DN	Primary Tumor	HWI-ST718_118408391:3:1301:18677:141923	M17659|TRAV2*02|Homo	58/58 nt	100	58	M35620|TRAJ40*01|Homo	37/37 nt	100	37	CAVPPSGTYKYIF	TRA
TCGA-GM-A2DN	Primary Tumor	HWI-ST718_118408391:3:2106:13453:48586	AE000660|TRAV35*01|Homo	45/45 nt	100	45	M35620|TRAJ40*01|Homo	53/53 nt	100	53	CAGQFTSGTYKYIF	TRA
TCGA-GM-A2DN	Primary Tumor	HWI-ST718_118408391:3:1106:19658:44918	AE000660|TRAV35*01|Homo	44/45 nt	97.7778	44	M35620|TRAJ40*01|Homo	53/53 nt	100	53	CAGQFTSGTYKYIF	TRA
TCGA-GM-A2DN	Primary Tumor	HWI-ST718_118408391:3:1208:8689:12508	AE000660|TRAV35*01|Homo	45/45 nt	100	45	M35620|TRAJ40*01|Homo	53/53 nt	100	53	CAGQFTSGTYKYIF	TRA
TCGA-GM-A2DN	Primary Tumor	HWI-ST718_118408391:3:1307:4765:119192	AE000660|TRAV26-1*01|Homo	44/44 nt	100	44	M94081|TRAJ38*01|Homo	57/57 nt	100	57	CCVLLHRQNAGNNRKLIW	TRA
TCGA-GM-A2DN	Primary Tumor	HWI-ST718_118408391:3:2304:17089:179892	AE000660|TRAV22*01|Homo	33/33 nt	100	33	AJ007774|TRAJ37*02|Homo	55/55 nt	100	55	CFAVGGSSNTGKLIF	TRA
TCGA-GM-A2DN	Primary Tumor	HWI-ST718_118408391:3:2201:16667:171531	AE000659|TRAV12-1*01|Homo	36/36 nt	100	36	X02886|TRAJ22*01|Homo	57/57 nt	100	57	CVVNGPPGSARQLTF	TRA
TCGA-GM-A2DN	Primary Tumor	HWI-ST718_118408391:3:1107:15278:20994	M17656|TRAV12-3*02|Homo	34/34 nt	100	34	M16747|TRAJ6*01|Homo	54/54 nt	100	54	CAMSRGSYIPTF	TRA
TCGA-GM-A2DN	Primary Tumor	HWI-ST718_118408391:3:1205:4355:193190	M17656|TRAV12-3*02|Homo	34/34 nt	100	34	M16747|TRAJ6*01|Homo	54/54 nt	100	54	CAMSRGSYIPTF	TRA
TCGA-GM-A2DN	Primary Tumor	HWI-ST718_118408391:3:1305:2741:95916	M17656|TRAV12-3*02|Homo	34/34 nt	100	34	M16747|TRAJ6*01|Homo	54/54 nt	100	54	CAMSRGSYIPTF	TRA
TCGA-GM-A2DN	Primary Tumor	HWI-ST718_118408391:3:2108:17283:29359	M17656|TRAV12-3*02|Homo	46/46 nt	100	46	M94081|TRAJ4*01|Homo	50/50 nt	100	50	CAFISGGYNKLIF	TRA
TCGA-BH-A201	Primary Tumor	HWI-ST514_115489139:2:2105:4271:151191	K02777|TRAV8-4*06|Homo	44/44 nt	100	44	M94081|TRAJ8*01|Homo	53/54 nt	98.1481	53	CAVSEMNTGFRKLVF	TRA
TCGA-BH-A201	Primary Tumor	HWI-ST514_115489139:1:1108:16537:15214	AE000659|TRAV8-3*01|Homo	44/44 nt	100	44	M94081|TRAJ43*01|Homo	54/54 nt	100	54	CAVDNNNDMRF	TRA
TCGA-BH-A201	Primary Tumor	HWI-ST514_115489139:2:1106:7070:18532	S81645|TRAV29/DV5*02|Homo	35/35 nt	100	35	X02886|TRAJ22*01|Homo	57/57 nt	100	57	CAATTGSARQLTF	TRA
TCGA-B6-A1KI	Primary Tumor	HWI-ST514_115489139:2:2208:9168:187077	Y10409|TRAV6*04|Homo	22/24 nt	91.6667	22	M14905|TRAJ31*01|Homo	53/56 nt	94.6429	53	CCGNNNARLIF	TRA
TCGA-B6-A1KI	Primary Tumor	HWI-ST514_115489139:2:2103:5808:162913	AE000660|TRAV8-7*01|Homo	20/21 nt	95.2381	20	M94081|TRAJ30*01|Homo	54/54 nt	100	54	CAVGDRDDKIIF	TRA
TCGA-C8-A26W	Primary Tumor	HWI-ST735_115885644:1:2307:9173:37591	X04954|TRAV13-1*02|Homo	64/64 nt	100	64	M94081|TRAJ26*01|Homo	38/38 nt	100	38	CAASNYGQNFVF	TRA
TCGA-C8-A26W	Primary Tumor	HWI-ST735_115885644:1:1308:11670:55030	M81774|TRAV12-2*02|Homo	63/63 nt	100	63	M35620|TRAJ40*01|Homo	37/37 nt	100	37	CAVTSGTYKYIF	TRA
TCGA-C8-A26W	Primary Tumor	HWI-ST735_115885644:1:2105:18570:133422	AE000660|TRAV27*01|Homo	54/54 nt	100	54	M94081|TRAJ41*01|Homo	44/44 nt	100	44	CAGANSNSGYALNF	TRA
TCGA-C8-A26W	Primary Tumor	HWI-ST735_115885644:1:2308:10480:10793	AE000661|TRAV38-2/DV8*01|Homo	68/68 nt	100	68	M94081|TRAJ54*01|Homo	28/28 nt	100	28	CISVLVIIQGAQKLVF	TRA
TCGA-C8-A26W	Primary Tumor	HWI-ST735_115885644:1:1306:11047:113627	M81774|TRAV12-2*02|Homo	25/25 nt	100	25	M94081|TRAJ45*01|Homo	61/61 nt	100	61	CAGQSGGGADGLTF	TRA
TCGA-C8-A26W	Primary Tumor	HWI-ST735_115885644:1:2208:7265:196231	M81774|TRAV12-2*02|Homo	25/25 nt	100	25	M94081|TRAJ45*01|Homo	61/61 nt	100	61	CAGQSGGGADGLTF	TRA
TCGA-C8-A26W	Primary Tumor	HWI-ST735_115885644:1:2305:13200:93271	AE000660|TRAV19*01|Homo	29/31 nt	93.5484	29	M16747|TRAJ6*01|Homo	52/53 nt	98.1132	52	CAETPAEGGSYIPTF	TRA
TCGA-BH-A1FC	Primary Tumor	HWI-ST735_114204793:2:2107:13179:64895	M97704|TRAV23/DV6*03|Homo	76/76 nt	100	76	M94081|TRAJ26*01|Homo	20/20 nt	100	20	CSKLLDNYGQNFVF	TRA
TCGA-BH-A1FC	Primary Tumor	HWI-ST735_114204793:1:2208:1599:151223	M35617|TRAV8-3*02|Homo	19/19 nt	100	19	M94081|TRAJ48*01|Homo	60/60 nt	100	60	CCGNANFGNEKLTF	TRA
TCGA-BH-A1FC	Primary Tumor	HWI-ST735_114204793:2:1108:1916:59307	AE000661|TRAV39*01|Homo	28/29 nt	96.5517	28	M35620|TRAJ40*01|Homo	51/51 nt	100	51	CAVERTYKYIF	TRA
TCGA-BH-A1FC	Primary Tumor	HWI-ST735_114204793:1:1208:15316:38862	AE000658|TRAV1-2*01|Homo	36/37 nt	97.2973	36	M94081|TRAJ30*01|Homo	52/52 nt	100	52	CAVDGIDRDDKIIF	TRA
TCGA-BH-A1FC	Primary Tumor	HWI-ST482_114177105:1:1204:11532:175127	AE000658|TRAV3*01|Homo	27/27 nt	100	27	AC023226|TRAJ13*02|Homo	58/58 nt	100	58	CTSGGYQKVTF	TRA
TCGA-AO-A0JI	Primary Tumor	HWI-ST434_105923907:6:45:17094:33889#0	AE000659|TRAV13-1*01|Homo	74/74 nt	100	74	M94081|TRAJ45*01|Homo	21/23 nt	91.3043	21	CLLLCSKLYSGGGAGGLTF	TRA
TCGA-AO-A0JI	Primary Tumor	HWI-ST434_105923907:6:47:16544:21355#0	X04954|TRAV13-1*02|Homo	73/74 nt	98.6486	73	M94081|TRAJ45*01|Homo	24/24 nt	100	24	CLLLCSQLYSGGGADGLTF	TRA
TCGA-AO-A0JI	Primary Tumor	HWI-ST434_105923907:6:7:11931:87828#0	AE000659|TRAV13-1*01|Homo	74/74 nt	100	74	M94081|TRAJ45*01|Homo	24/24 nt	100	24	CLLLCSKLYSGGGADGLTF	TRA
TCGA-AO-A0JI	Primary Tumor	HWI-ST434_105923907:6:7:5743:170400#0	AE000659|TRAV9-2*01|Homo	63/64 nt	98.4375	63	M94081|TRAJ28*01|Homo	29/29 nt	100	29	CTSVLWKLSGAGSYQLTF	TRA
TCGA-AO-A0JI	Primary Tumor	HWI-ST434_105923907:6:44:20646:108521#0	AE000659|TRAV9-2*01|Homo	64/64 nt	100	64	M94081|TRAJ28*01|Homo	29/29 nt	100	29	CTSVLWKLSGAGSYQLTF	TRA
TCGA-AO-A0JI	Primary Tumor	HWI-ST434_105923907:6:28:5390:99862#0	AE000659|TRAV12-1*01|Homo	46/46 nt	100	46	M94081|TRAJ43*01|Homo	52/52 nt	100	52	CVVHNNNDMRF	TRA
TCGA-C8-A12N	Primary Tumor	HWUSI-EAS1567_109122414:3:27:17711:3568#0	AE000660|TRAV19*01|Homo	47/47 nt	100	47	M94081|TRAJ37*01|Homo	49/50 nt	98	49	CALSELGNTGKLIF	TRA
TCGA-C8-A1HN	Primary Tumor	HWUSI-EAS776_110419252:6:39:6737:14801	AE000658|TRAV4*01|Homo	78/78 nt	100	78	M94081|TRAJ42*01|Homo	21/21 nt	100	21	CLVGGNYGGSQGNLIF	TRA
TCGA-C8-A1HN	Primary Tumor	HWUSI-EAS776_110419252:6:71:18389:11361	AE000659|TRAV12-2*01|Homo	62/62 nt	100	62	M94081|TRAJ45*01|Homo	32/32 nt	100	32	CAVRPNSGGGADGLTF	TRA
TCGA-A2-A25B	Primary Tumor	HWI-ST444_116124287:8:1306:7288:105937	X61070|TRAV36/DV7*02|Homo	20/20 nt	100	20	M94081|TRAJ48*01|Homo	60/60 nt	100	60	CTNFGNEKLTF	TRA
TCGA-BH-A203	Primary Tumor	HWI-ST444_116124218:6:1208:3723:141382	AE000659|TRAV12-2*01|Homo	27/27 nt	100	27	M94081|TRAJ42*01|Homo	55/55 nt	100	55	CAVNTGSQGNLIF	TRA
TCGA-AN-A0AL	Primary Tumor	HWUSI-EAS688_104356876:8:11:7475:14273	AE000659|TRAV8-3*01|Homo	68/68 nt	100	68	M94081|TRAJ10*01|Homo	28/28 nt	100	28	CAVGRTGGGNKLTF	TRA
TCGA-AN-A0AL	Primary Tumor	HWUSI-EAS1543_104366236:5:85:4873:19896	M17656|TRAV12-3*02|Homo	53/53 nt	100	53	M94081|TRAJ38*01|Homo	44/44 nt	100	44	CAMLNAGNNRKLIW	TRA
TCGA-AN-A0AL	Primary Tumor	HWUSI-EAS776_104635394:2:59:2697:15709	AE000660|TRAV24*01|Homo	45/45 nt	100	45	M94081|TRAJ38*01|Homo	54/54 nt	100	54	CAFNAGNNRKLIW	TRA
TCGA-AR-A2LQ	Primary Tumor	HWI-ST664_119845270:3:1102:11878:190645	AE000658|TRAV1-2*01|Homo	71/71 nt	100	71	M94081|TRAJ20*01|Homo	27/27 nt	100	27	CAVRDDDYKLSF	TRA
TCGA-AR-A2LQ	Primary Tumor	HWI-ST664_119845270:3:1104:3505:79680	AE000658|TRAV1-2*01|Homo	71/71 nt	100	71	M94081|TRAJ20*01|Homo	27/27 nt	100	27	CAVRDDDYKLSF	TRA
TCGA-AR-A2LQ	Primary Tumor	HWI-ST664_119845270:3:1206:7690:187456	AE000658|TRAV1-2*01|Homo	71/71 nt	100	71	M94081|TRAJ20*01|Homo	27/27 nt	100	27	CAVRDDDYKLSF	TRA
TCGA-AR-A2LQ	Primary Tumor	HWI-ST664_119845270:3:1207:13713:6840	AE000658|TRAV1-2*01|Homo	71/71 nt	100	71	M94081|TRAJ20*01|Homo	27/27 nt	100	27	CAVRDDDYKLSF	TRA
TCGA-AR-A2LQ	Primary Tumor	HWI-ST664_119845270:3:2103:3911:137061	AE000658|TRAV1-2*01|Homo	71/71 nt	100	71	M94081|TRAJ20*01|Homo	27/27 nt	100	27	CAVRDDDYKLSF	TRA
TCGA-AR-A2LQ	Primary Tumor	HWI-ST664_119845270:3:2205:6992:15107	AE000660|TRAV26-1*01|Homo	58/58 nt	100	58	M94081|TRAJ27*01|Homo	40/40 nt	100	40	CTIASSESSNAGKSTF	TRA
TCGA-AR-A2LQ	Primary Tumor	HWI-ST664_119845270:3:2105:15953:57197	AE000660|TRAV26-1*01|Homo	57/58 nt	98.2759	57	M94081|TRAJ27*01|Homo	40/40 nt	100	40	CTIASSESSNAGKSTF	TRA
TCGA-AR-A2LQ	Primary Tumor	HWI-ST664_119845270:3:2308:15381:170558	AE000660|TRAV26-1*01|Homo	58/58 nt	100	58	M94081|TRAJ27*01|Homo	38/41 nt	92.6829	38	CCVLLHRQSPPRQANHT	TRA
TCGA-AR-A2LQ	Primary Tumor	HWI-ST664_119845270:3:1205:15337:15295	AE000660|TRAV26-1*01|Homo	58/58 nt	100	58	M94081|TRAJ27*01|Homo	40/40 nt	100	40	CTIASSESSNAGKSTF	TRA
TCGA-AR-A2LQ	Primary Tumor	HWI-ST664_119845270:3:1208:9808:166362	AE000660|TRAV26-1*01|Homo	58/58 nt	100	58	M94081|TRAJ27*01|Homo	40/40 nt	100	40	CTIASSESSNAGKSTF	TRA
TCGA-A2-A04N	Primary Tumor	HWI-EAS319_109290436:1:17:4591:11474	AE000660|TRAV27*01|Homo	34/34 nt	100	34	M94081|TRAJ46*01|Homo	58/59 nt	98.3051	58	CAGKSSGDRLTF	TRA
TCGA-A8-A0A6	Primary Tumor	HWI-EAS109_105478020:1:4:9434:12029#0	AE000659|TRAV13-1*01|Homo	51/51 nt	100	51	M94081|TRAJ23*01|Homo	48/48 nt	100	48	CAASSNQGGKLIF	TRA
TCGA-A8-A0A6	Primary Tumor	HWI-EAS109_105478020:2:102:13342:1117#0	AE000661|TRAV38-2/DV8*01|Homo	58/58 nt	100	58	M94081|TRAJ49*01|Homo	39/39 nt	100	39	CAYRSASGNQFYF	TRA
TCGA-A8-A0A6	Primary Tumor	HWI-EAS109_105478020:3:70:1846:11927#0	AE000661|TRAV38-2/DV8*01|Homo	58/58 nt	100	58	M94081|TRAJ49*01|Homo	39/39 nt	100	39	CAYRSASGNQFYF	TRA
TCGA-A8-A0A6	Primary Tumor	HWI-EAS109_105478020:2:89:15901:4041#0	AE000661|TRAV41*01|Homo	67/67 nt	100	67	M94081|TRAJ41*01|Homo	29/29 nt	100	29	CRLHLCCLGSNSGYALNF	TRA
TCGA-A8-A0A6	Primary Tumor	HWI-EAS109_105478020:2:32:9463:9907#0	AE000660|TRAV26-2*01|Homo	43/44 nt	97.7273	43	M94081|TRAJ52*01|Homo	55/55 nt	100	55	CILRSAGGTSYGKLTF	TRA
TCGA-A8-A0A6	Primary Tumor	HWI-EAS109_105478020:1:55:1424:9179#0	AE000659|TRAV6*01|Homo	29/29 nt	100	29	M35619|TRAJ44*01|Homo	57/57 nt	100	57	CSRRSGTASKLTF	TRA
TCGA-A8-A0A6	Primary Tumor	HWI-EAS109_105478020:3:80:17534:13530#0	AE000661|TRAV41*01|Homo	20/20 nt	100	20	M94081|TRAJ41*01|Homo	58/59 nt	98.3051	58	CCLGSNSGYALNF	TRA
TCGA-E2-A158	Primary Tumor	HWI-ST664_110089864:2:6:10617:139913	AE000658|TRAV1-2*01|Homo	68/68 nt	100	68	AF532854|TRAJ32*02|Homo	27/27 nt	100	27	CAVTRGGATNKLIF	TRA
TCGA-E2-A158	Primary Tumor	HWI-ST664_110089864:2:26:20997:147978	AE000661|TRAV38-1*01|Homo	75/80 nt	93.75	75	M94081|TRAJ43*01|Homo	19/19 nt	100	19	CDVFLRLMRF	TRA
TCGA-E2-A158	Primary Tumor	HWI-ST664_110089864:2:3:9648:76653	AE000659|TRAV12-1*01|Homo	37/37 nt	100	37	M94081|TRAJ52*01|Homo	55/55 nt	100	55	CGEHHRDAGGTSYGKLTF	TRA
TCGA-E2-A158	Primary Tumor	HWI-ST664_110089864:2:23:16361:73161	AE000660|TRAV21*01|Homo	34/34 nt	100	34	M94081|TRAJ18*01|Homo	61/61 nt	100	61	CCFDRGSTLGRLYF	TRA
TCGA-LL-A5YL	Primary Tumor	HWI-ST444:142009261:C2DBEACXX:2:2103:8641:86208	AE000658|TRAV3*01|Homo	29/30 nt	96.6667	29	X02885|TRAJ12*01|Homo	60/60 nt	100	60	CAVRMDSSYKLIF	TRA
TCGA-A8-A09M	Primary Tumor	HWI-EAS110_105969435:4:79:9596:20088	M27371|TRAV26-1*02|Homo	77/77 nt	100	77	M94081|TRAJ27*01|Homo	21/21 nt	100	21	CIVSNTNAGKSTF	TRA
TCGA-A8-A09M	Primary Tumor	HWI-EAS110_105969435:4:23:6938:15623	AE000659|TRAV9-2*01|Homo	20/20 nt	100	20	M94081|TRAJ42*01|Homo	65/65 nt	100	65	CSEGSNYGGSQGNLIF	TRA
TCGA-A8-A09M	Primary Tumor	HWI-EAS110_105969435:4:112:9274:20858	X02850|TRAV8-6*01|Homo	47/47 nt	100	47	M35620|TRAJ40*01|Homo	49/49 nt	100	49	CAVSSPGTYKYIF	TRA
TCGA-A8-A09M	Primary Tumor	HWI-EAS110_105969435:4:24:11388:15708	AE000659|TRAV8-1*01|Homo	27/27 nt	100	27	M94081|TRAJ27*01|Homo	56/56 nt	100	56	CAVNAGTNAGKSTF	TRA
TCGA-C8-A8HP	Primary Tumor	HWI-ST482:144573012:C3K71ACXX:2:1210:6939:52235	AE000658|TRAV1-2*01|Homo	65/65 nt	100	65	M94081|TRAJ39*01|Homo	30/30 nt	100	30	CLLPLCCERWKNNNAGNMLTF	TRA
TCGA-C8-A8HP	Primary Tumor	HWI-ST482:144573012:C3K71ACXX:1:2108:4478:41111	AE000659|TRAV6*01|Homo	45/45 nt	100	45	M94081|TRAJ20*01|Homo	43/43 nt	100	43	CALLRGSDYKLSF	TRA
TCGA-C8-A8HP	Primary Tumor	HWI-ST482:144573012:C3K71ACXX:2:1114:17895:8253	X04954|TRAV13-1*02|Homo	50/50 nt	100	50	X02886|TRAJ22*01|Homo	47/47 nt	100	47	CAASITGSARQLTF	TRA
TCGA-C8-A8HP	Primary Tumor	HWI-ST482:144573012:C3K71ACXX:1:1311:1684:56178	X04954|TRAV13-1*02|Homo	50/50 nt	100	50	X02886|TRAJ22*01|Homo	47/47 nt	100	47	CAASITGSARQLTF	TRA
TCGA-C8-A8HP	Primary Tumor	HWI-ST482:144573012:C3K71ACXX:2:2114:4000:63543	M12959|TRAV8-4*04|Homo	77/78 nt	98.7179	77	M94081|TRAJ15*02|Homo	21/21 nt	100	21	CAVSNQAGTALIF	TRA
TCGA-C8-A8HP	Primary Tumor	HWI-ST482:144573012:C3K71ACXX:1:1111:6692:22383	AE000659|TRAV8-4*01|Homo	58/58 nt	100	58	M94081|TRAJ37*01|Homo	36/36 nt	100	36	CAVTVRSGNTGKLIF	TRA
TCGA-C8-A8HP	Primary Tumor	HWI-ST482:144573012:C3K71ACXX:1:2112:18857:57482	M97704|TRAV23/DV6*03|Homo	68/69 nt	98.5507	68	M94081|TRAJ36*01|Homo	29/29 nt	100	29	CAACKQTGANNLFF	TRA
TCGA-C8-A8HP	Primary Tumor	HWI-ST482:144573012:C3K71ACXX:1:2216:8964:57231	AE000660|TRAV29/DV5*01|Homo	52/52 nt	100	52	M94081|TRAJ52*01|Homo	43/43 nt	100	43	CAASEQNAGGTSYGKLTF	TRA
TCGA-C8-A8HP	Primary Tumor	HWI-ST482:144573012:C3K71ACXX:2:1303:3131:89920	AE000660|TRAV35*01|Homo	76/77 nt	98.7013	76	M14905|TRAJ31*01|Homo	24/24 nt	100	24	CAGQNNNARLMF	TRA
TCGA-C8-A8HP	Primary Tumor	HWI-ST482:144573012:C3K71ACXX:2:1204:21072:87592	AE000659|TRAV8-4*01|Homo	32/32 nt	100	32	M94081|TRAJ53*01|Homo	59/60 nt	98.3333	59	CFPPSRGSNYKLTF	TRA
TCGA-C8-A8HP	Primary Tumor	HWI-ST482:144573012:C3K71ACXX:2:1214:13584:92459	AE000659|TRAV14/DV4*02|Homo	29/29 nt	100	29	AF532854|TRAJ32*02|Homo	60/60 nt	100	60	CAMREGREYGGATNKLIF	TRA
TCGA-C8-A8HP	Primary Tumor	HWI-ST482:144573012:C3K71ACXX:1:1209:3761:56429	AE000659|TRAV6*01|Homo	43/45 nt	95.5556	43	M94081|TRAJ20*01|Homo	43/43 nt	100	43	CALLRGSDYKLSF	TRA
TCGA-AR-A2LH	Primary Tumor	HWI-ST434_119852412:5:1108:20300:187712	AE000659|TRAV8-3*01|Homo	60/60 nt	100	60	M94081|TRAJ11*01|Homo	36/36 nt	100	36	CAVGGRGYSTLTF	TRA
TCGA-AR-A2LH	Primary Tumor	HWI-ST434_119852412:5:1301:9147:32638	AE000659|TRAV8-3*01|Homo	60/60 nt	100	60	M94081|TRAJ11*01|Homo	36/36 nt	100	36	CAVGGRGYSTLTF	TRA
TCGA-AR-A2LH	Primary Tumor	HWI-ST434_119852412:5:1308:16738:179981	AE000659|TRAV8-3*01|Homo	60/60 nt	100	60	M94081|TRAJ11*01|Homo	36/36 nt	100	36	CAVGGRGYSTLTF	TRA
TCGA-AR-A2LH	Primary Tumor	HWI-ST434_119852412:5:2204:2788:69925	AE000659|TRAV8-3*01|Homo	60/60 nt	100	60	M94081|TRAJ11*01|Homo	36/36 nt	100	36	CAVGGRGYSTLTF	TRA
TCGA-AR-A2LH	Primary Tumor	HWI-ST434_119852412:5:1301:16033:116800	AE000659|TRAV13-1*01|Homo	58/61 nt	95.082	58	M94081|TRAJ48*01|Homo	27/29 nt	93.1034	27	CAACEGVCFGNEELAF	TRA
TCGA-AR-A2LH	Primary Tumor	HWI-ST434_119852412:5:2308:16392:62246	X04954|TRAV13-1*02|Homo	60/60 nt	100	60	M94081|TRAJ48*01|Homo	29/29 nt	100	29	CAASEGVSFGNEKLTF	TRA
TCGA-AR-A2LH	Primary Tumor	HWI-ST434_119852412:5:1303:5853:29391	AE000660|TRAV20*01|Homo	70/70 nt	100	70	AJ007774|TRAJ37*02|Homo	22/22 nt	100	22	CCAGSSNTGKLIF	TRA
TCGA-AR-A2LH	Primary Tumor	HWI-ST434_119852412:5:2303:18732:186313	AE000661|TRAV38-1*01|Homo	61/61 nt	100	61	M94081|TRAJ26*01|Homo	30/30 nt	100	30	CAFMKHNIGNYGQNFVF	TRA
TCGA-AR-A2LH	Primary Tumor	HWI-ST434_119852412:5:1107:7086:8650	AE000661|TRAV41*01|Homo	34/34 nt	100	34	M94081|TRAJ45*01|Homo	58/58 nt	100	58	CAVTPTGGGADGLTF	TRA
TCGA-AR-A2LH	Primary Tumor	HWI-ST434_119852412:5:2106:5061:180698	AE000661|TRAV38-1*01|Homo	25/26 nt	96.1538	25	M35619|TRAJ44*01|Homo	58/58 nt	100	58	CAFMKPTGTASKLTF	TRA
TCGA-AR-A2LH	Primary Tumor	HWI-ST434_119852412:5:2206:6409:188319	X04954|TRAV13-1*02|Homo	45/45 nt	100	45	AJ007774|TRAJ37*02|Homo	51/51 nt	100	51	CLLLCSKSHGSSNTGKLIF	TRA
TCGA-AR-A2LH	Primary Tumor	HWI-ST434_119852412:5:2207:11360:140285	X04954|TRAV13-1*02|Homo	45/45 nt	100	45	AJ007774|TRAJ37*02|Homo	51/51 nt	100	51	CLLLCSKSHGSSNTGKLIF	TRA
TCGA-AR-A2LH	Primary Tumor	HWI-ST434_119852412:5:1104:15708:129104	X04954|TRAV13-1*02|Homo	45/45 nt	100	45	AJ007774|TRAJ37*02|Homo	51/51 nt	100	51	CLLLCSKSHGSSNTGKLIF	TRA
TCGA-AR-A2LH	Primary Tumor	HWI-ST434_119852412:5:2107:15361:53180	X04954|TRAV13-1*02|Homo	24/24 nt	100	24	M94081|TRAJ36*01|Homo	56/56 nt	100	56	CAATGANNLFF	TRA
TCGA-AR-A2LH	Primary Tumor	HWI-ST434_119852412:5:2307:12635:169585	X04954|TRAV13-1*02|Homo	24/24 nt	100	24	M94081|TRAJ36*01|Homo	56/56 nt	100	56	CAATGANNLFF	TRA
TCGA-A8-A07B	Primary Tumor	HWI-EAS97_104428029:5:8:18863:4116	AE000659|TRAV8-1*01|Homo	67/67 nt	100	67	M94081|TRAJ9*01|Homo	33/33 nt	100	33	CAVNANTGGFKTIF	TRA
TCGA-A8-A07B	Primary Tumor	HWI-EAS97_104428029:6:37:1806:14392	S81645|TRAV29/DV5*02|Homo	45/45 nt	100	45	M94081|TRAJ42*01|Homo	40/40 nt	100	40	CAADARLRGGSQGNLIF	TRA
TCGA-BH-A0H3	Primary Tumor	HWI-ST118_110594033:5:27:3172:166907	AE000659|TRAV16*01|Homo	79/79 nt	100	79	M94081|TRAJ10*01|Homo	20/20 nt	100	20	CALSEGGGNKLTF	TRA
TCGA-BH-A0H3	Primary Tumor	HWI-ST118_110594033:5:68:17883:196847	AE000659|TRAV16*01|Homo	79/79 nt	100	79	M94081|TRAJ10*01|Homo	19/20 nt	95	19	CALSEGGGNNLTF	TRA
TCGA-BH-A0H3	Primary Tumor	HWI-ST118_110594033:5:24:14477:136413	AE000660|TRAV21*01|Homo	63/63 nt	100	63	M35622|TRAJ34*01|Homo	31/31 nt	100	31	CAVPLYNTDKLIF	TRA
TCGA-BH-A0H3	Primary Tumor	HWI-ST118_110594033:5:68:15761:167403	AE000660|TRAV21*01|Homo	63/63 nt	100	63	M35622|TRAJ34*01|Homo	31/31 nt	100	31	CAVPLYNTDKLIF	TRA
TCGA-BH-A0H3	Primary Tumor	HWI-ST118_110594033:5:67:15871:162262	AE000661|TRAV38-2/DV8*01|Homo	75/75 nt	100	75	M35619|TRAJ44*01|Homo	22/22 nt	100	22	CAYSYGTASKLTF	TRA
TCGA-BH-A0H3	Primary Tumor	HWI-ST118_110594033:5:28:4570:176023	AE000661|TRAV38-2/DV8*01|Homo	75/75 nt	100	75	M94081|TRAJ43*01|Homo	21/21 nt	100	21	CAYRIFNDMRF	TRA
TCGA-BH-A0H3	Primary Tumor	HWI-ST118_110594033:5:66:13071:131628	AE000659|TRAV16*01|Homo	42/42 nt	100	42	M94081|TRAJ56*01|Homo	56/56 nt	100	56	CALSGPGANSKLTF	TRA
TCGA-BH-A0H3	Primary Tumor	HWI-ST118_110594033:5:26:5669:30167	AE000660|TRAV19*01|Homo	29/30 nt	96.6667	29	AF033825|TRAJ47*02|Homo	53/53 nt	100	53	CALSEAIYGNKLVF	TRA
TCGA-BH-A0H3	Primary Tumor	HWI-ST118_110594033:5:27:9950:51024	AE000660|TRAV19*01|Homo	30/30 nt	100	30	AF033825|TRAJ47*02|Homo	53/53 nt	100	53	CALSEAIYGNKLVF	TRA
TCGA-BH-A0H3	Primary Tumor	HWI-ST118_110594033:5:43:17670:112560	AE000659|TRAV8-3*01|Homo	20/20 nt	100	20	M94081|TRAJ36*01|Homo	52/52 nt	100	52	CAVAILGAGANNLFF	TRA
TCGA-BH-A0H3	Primary Tumor	HWI-ST118_110594033:5:48:3049:130770	AE000658|TRAV1-2*01|Homo	46/46 nt	100	46	M94081|TRAJ33*01|Homo	52/53 nt	98.1132	52	CAVTDSNYQLIW	TRA
TCGA-BH-A0H3	Primary Tumor	HWI-ST118_110594033:5:24:2560:117419	AE000658|TRAV1-2*01|Homo	46/46 nt	100	46	M94081|TRAJ33*01|Homo	53/53 nt	100	53	CAVTDSNYQLIW	TRA
TCGA-C8-A26Z	Primary Tumor	HWI-ST664_114750549:7:1101:10287:17206	M17658|TRAV13-2*02|Homo	57/58 nt	98.2759	57	M94081|TRAJ11*01|Homo	35/35 nt	100	35	CAASENSGYSTLTF	TRA
TCGA-C8-A12U	Primary Tumor	HWI-ST434_109457553:5:43:16712:155442	AE000659|TRAV13-1*01|Homo	60/60 nt	100	60	M94081|TRAJ30*01|Homo	29/29 nt	100	29	CLLLCSKYPPGVNRDDKIIF	TRA
TCGA-C8-A12U	Primary Tumor	HWI-ST434_109457553:5:47:11660:171418	AE000660|TRAV19*01|Homo	71/71 nt	100	71	X02886|TRAJ22*01|Homo	27/27 nt	100	27	CALRSGSARQLTF	TRA
TCGA-C8-A12U	Primary Tumor	HWI-ST434_109457553:5:1:17705:94778	AE000660|TRAV25*01|Homo	59/59 nt	100	59	M35620|TRAJ40*01|Homo	40/40 nt	100	40	CADSGTYKYIF	TRA
TCGA-C8-A12U	Primary Tumor	HWI-ST434_109457553:5:45:2988:70220	AE000661|TRAV38-2/DV8*01|Homo	75/77 nt	97.4026	75	M94081|TRAJ39*01|Homo	26/26 nt	100	26	CISVLYNAGNMLTF	TRA
TCGA-C8-A12U	Primary Tumor	HWI-ST434_109457553:5:23:19596:23901	AE000660|TRAV36/DV7*01|Homo	26/28 nt	92.8571	26	M94081|TRAJ53*01|Homo	54/54 nt	100	54	CADSHPVNSGGSNYKLTF	TRA
TCGA-C8-A12U	Primary Tumor	HWI-ST434_109457553:5:64:14866:72873	M81774|TRAV12-2*02|Homo	35/35 nt	100	35	M35620|TRAJ40*01|Homo	60/60 nt	100	60	CARSTSGTYKYIF	TRA
TCGA-C8-A12U	Primary Tumor	HWI-ST434_109457553:5:7:11217:54050	AE000659|TRAV8-6*02|Homo	32/32 nt	100	32	X05773|TRAJ17*01|Homo	56/56 nt	100	56	CAVIGGAAGNKLTF	TRA
TCGA-C8-A12U	Primary Tumor	HWI-ST434_109457553:5:2:20652:153191	AE000658|TRAV3*01|Homo	27/27 nt	100	27	M16747|TRAJ6*01|Homo	56/57 nt	98.2456	56	CAVRGRSKTGGSYIPTF	TRA
TCGA-BH-A0W5	Primary Tumor	HWUSI-EAS677_108637648:4:105:4108:16051	M12959|TRAV8-4*04|Homo	66/67 nt	98.5075	66	M35620|TRAJ40*01|Homo	32/32 nt	100	32	CCEGTGTYKYIF	TRA
TCGA-BH-A0W5	Primary Tumor	HWUSI-EAS677_108637648:3:88:18777:1576	AE000660|TRAV35*01|Homo	64/64 nt	100	64	M94081|TRAJ52*01|Homo	35/35 nt	100	35	CAGQYAGGTSYGKLTF	TRA
TCGA-BH-A0W5	Primary Tumor	HWUSI-EAS677_108637648:3:67:16184:3845	AE000659|TRAV13-1*01|Homo	36/36 nt	100	36	M94081|TRAJ53*01|Homo	61/61 nt	100	61	CAASGGSNYKLTF	TRA
TCGA-BH-A0W5	Primary Tumor	HWUSI-EAS677_108637648:3:3:13610:11712	AE000660|TRAV26-2*01|Homo	25/25 nt	100	25	M94081|TRAJ43*01|Homo	52/52 nt	100	52	CILGPGNNNDMRF	TRA
TCGA-BH-A0W5	Primary Tumor	HWUSI-EAS677_108637648:3:79:11485:5693	AE000660|TRAV25*01|Homo	23/23 nt	100	23	M94081|TRAJ37*01|Homo	52/52 nt	100	52	CAGNTGKLIF	TRA
TCGA-BH-A0W5	Primary Tumor	HWUSI-EAS677_108637648:3:105:4593:16181	AE000660|TRAV17*01|Homo	24/25 nt	96	24	M94081|TRAJ10*01|Homo	59/59 nt	100	59	CYGRSSTTGGGNKLTF	TRA
TCGA-BH-A0W5	Primary Tumor	HWUSI-EAS677_108637648:3:32:5852:15420	AE000659|TRAV13-2*01|Homo	35/35 nt	100	35	M94081|TRAJ4*01|Homo	55/55 nt	100	55	CAARLGGYNKLIF	TRA
TCGA-BH-A0DE	Primary Tumor	HWUSI-EAS688_109450983:8:37:11164:14992	AE000658|TRAV1-2*01|Homo	73/75 nt	97.3333	73	M94081|TRAJ33*01|Homo	27/27 nt	100	27	CAVKDSNYQLIW	TRA
TCGA-BH-A0DE	Primary Tumor	HWUSI-EAS688_109450983:7:2:3329:9930	AE000659|TRAV8-3*01|Homo	45/46 nt	97.8261	45	M94081|TRAJ33*01|Homo	56/56 nt	100	56	CAGDSNYQLIW	TRA
TCGA-BH-A0DE	Primary Tumor	HWUSI-EAS688_109450983:8:21:15999:8513	AE000660|TRAV21*01|Homo	47/47 nt	100	47	AF532854|TRAJ32*02|Homo	48/48 nt	100	48	CAFYGGATNKLIF	TRA
TCGA-BH-A0DE	Primary Tumor	HWUSI-EAS688_109450983:8:21:15999:8513	AE000660|TRAV24*01|Homo	23/24 nt	95.8333	23	AF532854|TRAJ32*02|Homo	60/60 nt	100	60	CAFYGGATNKLIF	TRA
TCGA-D8-A1XO	Primary Tumor	HWI-ST482_114177089:3:1208:11800:37105	X04954|TRAV13-1*02|Homo	58/58 nt	100	58	M94081|TRAJ24*02|Homo	37/37 nt	100	37	CAARGADSWGKLQF	TRA
TCGA-D8-A1XO	Primary Tumor	HWI-ST434_114203772:6:1104:3603:100809	AE000659|TRAV13-1*01|Homo	52/52 nt	100	52	M94081|TRAJ48*01|Homo	45/45 nt	100	45	CAASGGNEKLTF	TRA
TCGA-D8-A1XO	Primary Tumor	HWI-ST434_114203772:5:2103:8361:73650	AE000660|TRAV25*01|Homo	48/48 nt	100	48	M16747|TRAJ6*01|Homo	47/47 nt	100	47	CAGREGSYIPTF	TRA
TCGA-A8-A097	Primary Tumor	HWUSI-EAS776_105842736:5:1:12196:17210	AE000658|TRAV3*01|Homo	71/71 nt	100	71	M94081|TRAJ33*01|Homo	21/21 nt	100	21	CAVRDITGSNYQLIW	TRA
TCGA-A8-A097	Primary Tumor	HWUSI-EAS776_105842736:6:108:2948:1932	AE000658|TRAV3*01|Homo	64/65 nt	98.4615	64	M94081|TRAJ33*01|Homo	27/27 nt	100	27	CAVRDITGSNYQLIW	TRA
TCGA-A8-A097	Primary Tumor	HWUSI-EAS776_105842736:5:109:8418:7852	AE000659|TRAV13-2*01|Homo	78/78 nt	100	78	M94081|TRAJ53*01|Homo	28/28 nt	100	28	CAENSGGSNYKLTF	TRA
TCGA-A8-A097	Primary Tumor	HWUSI-EAS776_105842736:6:118:7108:4818	AE000659|TRAV13-2*01|Homo	77/78 nt	98.7179	77	M94081|TRAJ53*01|Homo	28/28 nt	100	28	CAENSGGSNYKLTF	TRA
TCGA-A8-A097	Primary Tumor	HWUSI-EAS776_105842736:6:32:3824:7865	AE000659|TRAV9-2*01|Homo	71/72 nt	98.6111	71	M94081|TRAJ28*01|Homo	27/27 nt	100	27	CALISGAGSYQLTF	TRA
TCGA-A8-A097	Primary Tumor	HWUSI-EAS776_105842736:5:93:19284:10486	X02850|TRAV8-6*01|Homo	68/68 nt	100	68	M35620|TRAJ40*01|Homo	29/29 nt	100	29	CAVSEGTSGTYKYIF	TRA
TCGA-A8-A097	Primary Tumor	HWUSI-EAS776_105842736:5:97:12817:17279	X02850|TRAV8-6*01|Homo	64/64 nt	100	64	M94081|TRAJ5*01|Homo	33/33 nt	100	33	CAVSAYTGRRALTF	TRA
TCGA-E2-A10A	Primary Tumor	HWUSI-EAS1567_109122414:5:10:18213:10927	AE000658|TRAV1-2*01|Homo	71/71 nt	100	71	M94081|TRAJ33*01|Homo	28/28 nt	100	28	CAVTDSNYQLIW	TRA
TCGA-E2-A10A	Primary Tumor	HWUSI-EAS1567_109122414:5:5:4850:13909	AE000659|TRAV12-2*01|Homo	84/84 nt	100	84	M94081|TRAJ49*01|Homo	21/21 nt	100	21	CAVNTGNQFYF	TRA
TCGA-E2-A10A	Primary Tumor	HWUSI-EAS1567_109122414:6:10:11714:20165	AE000660|TRAV25*01|Homo	82/82 nt	100	82	M94081|TRAJ26*01|Homo	20/21 nt	95.2381	20	CAGNNYGQNFVF	TRA
TCGA-E2-A10A	Primary Tumor	HWUSI-EAS1567_109122414:6:65:4085:1973	AE000660|TRAV25*01|Homo	82/82 nt	100	82	M94081|TRAJ26*01|Homo	20/21 nt	95.2381	20	CAGNNYGQNFVF	TRA
TCGA-E2-A10A	Primary Tumor	HWUSI-EAS1567_109122414:6:65:4085:1973	AE000660|TRAV25*01|Homo	23/23 nt	100	23	M94081|TRAJ26*01|Homo	60/61 nt	98.3607	60	CAGNNYGQNFVF	TRA
TCGA-E2-A10A	Primary Tumor	HWUSI-EAS1567_109122414:6:10:11714:20165	AE000660|TRAV25*01|Homo	23/23 nt	100	23	M94081|TRAJ26*01|Homo	60/61 nt	98.3607	60	CAGNNYGQNFVF	TRA
TCGA-S3-AA11	Primary Tumor	HWI-ST720:146417965:C5A0HACXX:3:2208:11626:40505	M95394|TRAV38-1*03|Homo	73/73 nt	100	73	M94081|TRAJ43*01|Homo	22/22 nt	100	22	CALCYNNNDMRF	TRA
TCGA-S3-AA11	Primary Tumor	HWI-ST485:146066425:C4U19ACXX:5:1311:18651:91374	AE000660|TRAV35*01|Homo	28/28 nt	100	28	M94081|TRAJ57*01|Homo	58/58 nt	100	58	CAGHQGGSEKLVF	TRA
TCGA-S3-AA11	Primary Tumor	HWI-ST720:146417965:C5A0HACXX:3:2212:20694:73356	AE000661|TRAV38-2/DV8*01|Homo	38/38 nt	100	38	M94081|TRAJ30*01|Homo	53/53 nt	100	53	CAYRSAGSRDDKIIF	TRA
TCGA-BH-A0GZ	Primary Tumor	ILLUMINA-63A70C_105583654:5:80:18984:5989#0	AE000660|TRAV36/DV7*01|Homo	40/41 nt	97.561	40	M94081|TRAJ18*01|Homo	52/52 nt	100	52	CAVEGLGRGSTLGRLYF	TRA
TCGA-A7-A26F	Primary Tumor	HWI-ST489_114338455:1:1202:8790:98628	AE000659|TRAV6*01|Homo	65/66 nt	98.4848	65	M94081|TRAJ45*01|Homo	35/35 nt	100	35	CALYSGGGADGLTF	TRA
TCGA-A7-A26F	Primary Tumor	HWI-ST489_114338455:1:1207:15652:68638	Y10410|TRAV6*05|Homo	63/63 nt	100	63	M94081|TRAJ45*01|Homo	32/34 nt	94.1176	32	CAQYSGGGADGLPF	TRA
TCGA-A7-A26F	Primary Tumor	HWI-ST489_114338455:2:2206:1545:148480	Z49060|TRAV6*03|Homo	63/63 nt	100	63	M94081|TRAJ45*01|Homo	34/35 nt	97.1429	34	CALYSGGGAGGLTF	TRA
TCGA-A7-A26F	Primary Tumor	HWI-ST489_114338455:3:2105:20747:29183	AE000659|TRAV6*01|Homo	65/66 nt	98.4848	65	M94081|TRAJ45*01|Homo	35/35 nt	100	35	CALYSGGGADGLTF	TRA
TCGA-A7-A26F	Primary Tumor	HWI-ST489_114338455:3:2107:16789:58914	AE000659|TRAV6*01|Homo	65/66 nt	98.4848	65	M94081|TRAJ45*01|Homo	35/35 nt	100	35	CALYSGGGADGLTF	TRA
TCGA-A7-A26F	Primary Tumor	HWI-ST489_114338455:1:1205:7795:74797	AE000659|TRAV8-4*01|Homo	71/71 nt	100	71	M94081|TRAJ42*01|Homo	25/25 nt	100	25	CCECRGSQGNLIF	TRA
TCGA-D8-A1XZ	Primary Tumor	HWI-ST474_115187306:8:2202:19821:184665	AE000659|TRAV12-1*01|Homo	38/39 nt	97.4359	38	M94081|TRAJ39*01|Homo	56/56 nt	100	56	CVVISNNAGNMLTF	TRA
TCGA-D8-A1XZ	Primary Tumor	HWI-ST474_115187306:8:1307:4564:186115	AE000660|TRAV21*01|Homo	42/42 nt	100	42	M94081|TRAJ21*01|Homo	49/49 nt	100	49	CAVRPGRYNFNKFYF	TRA
TCGA-D8-A1XZ	Primary Tumor	HWI-ST474_115187306:8:2104:2722:11967	AE000660|TRAV21*01|Homo	42/42 nt	100	42	M94081|TRAJ21*01|Homo	49/49 nt	100	49	CAVRPGRYNFNKFYF	TRA
TCGA-AO-A0JE	Primary Tumor	HWUSI-EAS576_105477868:2:10:15934:2841#0	X04954|TRAV13-1*02|Homo	52/52 nt	100	52	M94081|TRAJ11*01|Homo	45/46 nt	97.8261	45	CLLLCSGGYSTLTF	TRA
TCGA-AO-A0JE	Primary Tumor	HWUSI-EAS576_105477868:3:117:6149:18611#0	AE000659|TRAV13-1*01|Homo	52/52 nt	100	52	M94081|TRAJ11*01|Homo	42/44 nt	95.4545	42	CLLLCSGGYSTLTF	TRA
TCGA-AO-A0JE	Primary Tumor	HWUSI-EAS576_105477868:2:97:14574:4271#0	AE000660|TRAV25*01|Homo	48/48 nt	100	48	M94081|TRAJ20*01|Homo	47/47 nt	100	47	CAGERSNDYKLSF	TRA
TCGA-AO-A0JE	Primary Tumor	HWUSI-EAS576_105477868:1:74:9430:6655#0	AE000659|TRAV9-2*01|Homo	24/24 nt	100	24	M35619|TRAJ44*01|Homo	57/57 nt	100	57	CALTVTSGTASKLTF	TRA
TCGA-AO-A0JE	Primary Tumor	HWUSI-EAS576_105477868:3:90:16440:2926#0	M95394|TRAV38-1*03|Homo	44/45 nt	97.7778	44	M35620|TRAJ40*01|Homo	48/48 nt	100	48	CALAGTYKYIF	TRA
TCGA-AO-A0JE	Primary Tumor	HWUSI-EAS576_105477868:1:61:4847:11454#0	AE000659|TRAV5*01|Homo	24/24 nt	100	24	M94081|TRAJ36*01|Homo	57/57 nt	100	57	CAESMKTGANNLFF	TRA
TCGA-AO-A0JE	Primary Tumor	HWUSI-EAS576_105477868:2:88:16290:2604#0	AE000660|TRAV25*01|Homo	47/48 nt	97.9167	47	M94081|TRAJ20*01|Homo	47/47 nt	100	47	CAGERSNDYKLSF	TRA
TCGA-AO-A0JE	Primary Tumor	HWUSI-EAS576_105477868:2:78:18766:15230#0	AE000660|TRAV17*01|Homo	27/27 nt	100	27	M94081|TRAJ11*01|Homo	53/53 nt	100	53	CATDARGGYSTLTF	TRA
TCGA-AO-A0JE	Primary Tumor	HWUSI-EAS576_105477868:2:16:12570:19717#0	AE000660|TRAV27*01|Homo	46/48 nt	95.8333	46	M16747|TRAJ6*01|Homo	53/55 nt	96.3636	53	CAGAQRKLHTYI	TRA
TCGA-D8-A27R	Primary Tumor	HWI-ST444_116124287:7:1101:4324:70474	AE000658|TRAV1-2*01|Homo	70/70 nt	100	70	M16747|TRAJ6*01|Homo	31/31 nt	100	31	CAVRASGGSYIPTF	TRA
TCGA-D8-A27R	Primary Tumor	HWI-ST444_116124287:7:1202:5256:9512	AE000659|TRAV10*01|Homo	70/70 nt	100	70	AC023226|TRAJ13*02|Homo	25/25 nt	100	25	CGEPRGGYQKVTF	TRA
TCGA-D8-A27R	Primary Tumor	HWI-ST444_116124287:7:2208:2415:4381	AE000659|TRAV10*01|Homo	70/70 nt	100	70	AC023226|TRAJ13*02|Homo	25/25 nt	100	25	CGEPRGGYQKVTF	TRA
TCGA-D8-A27R	Primary Tumor	HWI-ST444_116124287:7:2106:15577:77948	AE000659|TRAV9-2*01|Homo	62/62 nt	100	62	M94081|TRAJ53*01|Homo	32/32 nt	100	32	CALGGSGGSNYKLTF	TRA
TCGA-D8-A27R	Primary Tumor	HWI-ST444_116124287:7:2106:16606:61438	AE000660|TRAV19*01|Homo	50/50 nt	100	50	M94081|TRAJ58*01|Homo	49/49 nt	100	49	CALSEAETSGSRLTF	TRA
TCGA-D8-A27R	Primary Tumor	HWI-ST444_116124287:7:1206:11331:108346	AE000660|TRAV26-2*01|Homo	72/72 nt	100	72	M94081|TRAJ57*01|Homo	26/26 nt	100	26	CILGQGGSEKLVF	TRA
TCGA-D8-A27R	Primary Tumor	HWI-ST444_116124287:7:1306:20723:165607	AE000660|TRAV26-2*01|Homo	72/72 nt	100	72	M94081|TRAJ57*01|Homo	26/26 nt	100	26	CILGQGGSEKLVF	TRA
TCGA-D8-A27R	Primary Tumor	HWI-ST444_116124287:7:2301:14243:116791	AE000661|TRAV38-1*01|Homo	73/73 nt	100	73	M94081|TRAJ42*01|Homo	23/23 nt	100	23	CAFIQYGGSQGNLIF	TRA
TCGA-D8-A27R	Primary Tumor	HWI-ST444_116124287:7:1103:20912:152478	AE000659|TRAV9-2*01|Homo	25/25 nt	100	25	M94081|TRAJ53*01|Homo	60/60 nt	100	60	CSEQGGGSNYKLTF	TRA
TCGA-D8-A27R	Primary Tumor	HWI-ST444_116124287:7:1103:6574:109363	AE000659|TRAV8-3*01|Homo	32/32 nt	100	32	M94081|TRAJ29*01|Homo	53/53 nt	100	53	CAVGLQGGNTPLVF	TRA
TCGA-EW-A1J2	Primary Tumor	HWI-ST735_114204793:7:2104:19542:24245	AE000659|TRAV13-2*01|Homo	72/72 nt	100	72	M94081|TRAJ11*01|Homo	22/22 nt	100	22	CAEKGENSGYSTLTF	TRA
TCGA-EW-A1J2	Primary Tumor	HWI-ST735_114204793:8:2106:20746:46706	AE000660|TRAV19*01|Homo	55/55 nt	100	55	M94081|TRAJ45*01|Homo	38/38 nt	100	38	CSPHMYSGGGADGLTF	TRA
TCGA-EW-A1J2	Primary Tumor	HWI-ST735_114204793:7:1204:5732:100978	AE000660|TRAV21*01|Homo	77/77 nt	100	77	M94081|TRAJ53*01|Homo	22/22 nt	100	22	CAVYSGGSNYKLTF	TRA
TCGA-EW-A1J2	Primary Tumor	HWI-ST482_114177105:4:1108:13676:90522	AE000660|TRAV21*01|Homo	77/77 nt	100	77	M94081|TRAJ53*01|Homo	22/22 nt	100	22	CAVYSGGSNYKLTF	TRA
TCGA-EW-A1J2	Primary Tumor	HWI-ST735_114204793:7:1203:21353:99209	AE000660|TRAV21*01|Homo	77/77 nt	100	77	M94081|TRAJ53*01|Homo	22/22 nt	100	22	CAVYSGGSNYKLTF	TRA
TCGA-EW-A1J2	Primary Tumor	HWI-ST735_114204793:7:1202:20953:165784	AE000660|TRAV26-1*01|Homo	69/69 nt	100	69	M94081|TRAJ33*01|Homo	27/27 nt	100	27	CIVRVTDSNYQLIW	TRA
TCGA-EW-A1J2	Primary Tumor	HWI-ST735_114204793:7:1107:3018:129301	AE000660|TRAV26-1*01|Homo	68/68 nt	100	68	M94081|TRAJ33*01|Homo	29/29 nt	100	29	CIVRVTDSNYQLIW	TRA
TCGA-EW-A1J2	Primary Tumor	HWI-ST735_114204793:8:1208:9173:47380	AE000660|TRAV26-1*01|Homo	68/68 nt	100	68	M94081|TRAJ33*01|Homo	29/29 nt	100	29	CIVRVTDSNYQLIW	TRA
TCGA-EW-A1J2	Primary Tumor	HWI-ST735_114204793:8:2208:21326:47124	AE000660|TRAV26-1*01|Homo	64/64 nt	100	64	M94081|TRAJ33*01|Homo	28/29 nt	96.5517	28	CIVRVTDSNYQLIW	TRA
TCGA-EW-A1J2	Primary Tumor	HWI-ST735_114204793:8:2207:4770:158533	AE000660|TRAV29/DV5*01|Homo	56/56 nt	100	56	M35619|TRAJ44*01|Homo	33/33 nt	100	33	CTSVQGEGDGTASKLTF	TRA
TCGA-EW-A1J2	Primary Tumor	HWI-ST735_114204793:8:2104:7520:127518	X04954|TRAV13-1*02|Homo	36/36 nt	100	36	M94081|TRAJ30*01|Homo	56/56 nt	100	56	CAGANRDDKIIF	TRA
TCGA-S3-AA17	Primary Tumor	HWI-ST118:146274257:C4UKUACXX:4:1315:15648:11921	M21626|TRAV14/DV4*01|Homo	24/24 nt	100	24	M94081|TRAJ57*01|Homo	21/23 nt	91.3043	21	CVPTKGFWGLCLTAQLFF	TRA
TCGA-S3-AA17	Primary Tumor	HWI-ST118:146274257:C4UKUACXX:4:1310:2356:86662	AE000660|TRAV29/DV5*01|Homo	27/27 nt	100	27	M94081|TRAJ52*01|Homo	65/65 nt	100	65	CAAGGDAGGTSYGKLTF	TRA
TCGA-S3-AA17	Primary Tumor	HWI-ST118:146274257:C4UKUACXX:4:1310:2356:86662	AE000660|TRAV29/DV5*01|Homo	27/27 nt	100	27	M94081|TRAJ52*01|Homo	63/64 nt	98.4375	63	CAAGGDAGGTSYGKLTF	TRA
TCGA-S3-AA17	Primary Tumor	HWI-ST489:146478129:C5A8LACXX:5:1112:13217:46860	AE000661|TRAV38-2/DV8*01|Homo	43/43 nt	100	43	M94081|TRAJ49*01|Homo	49/50 nt	98	49	CAYRSAGVDQFYF	TRA
TCGA-S3-AA17	Primary Tumor	HWI-ST118:146274257:C4UKUACXX:2:2210:4940:78033	M17659|TRAV2*02|Homo	45/47 nt	95.7447	45	M94081|TRAJ36*01|Homo	54/54 nt	100	54	CAVPGANNLFF	TRA
TCGA-S3-AA17	Primary Tumor	HWI-ST118:146274257:C4UKUACXX:2:1215:11804:90291	AE000659|TRAV9-2*01|Homo	22/22 nt	100	22	M35622|TRAJ34*01|Homo	50/50 nt	100	50	CALRGRGTDKLIF	TRA
TCGA-S3-AA17	Primary Tumor	HWI-ST118:146274257:C4UKUACXX:4:1212:9092:72190	AE000659|TRAV12-1*01|Homo	27/27 nt	100	27	X05775|TRAJ15*01|Homo	57/57 nt	100	57	CVVHQAGTALIF	TRA
TCGA-S3-AA17	Primary Tumor	HWI-ST118:146274257:C4UKUACXX:4:2207:4761:55786	AE000659|TRAV12-1*01|Homo	27/27 nt	100	27	X05775|TRAJ15*01|Homo	57/57 nt	100	57	CVVHQAGTALIF	TRA
TCGA-B6-A0IM	Primary Tumor	HWUSI-EAS631_106053656:4:80:7217:11424	AE000660|TRAV23/DV6*01|Homo	64/64 nt	100	64	M94081|TRAJ43*01|Homo	29/29 nt	100	29	CAASLNDMRF	TRA
TCGA-B6-A0IM	Primary Tumor	HWUSI-EAS631_106053656:4:19:10351:14196	AE000660|TRAV29/DV5*01|Homo	71/71 nt	100	71	M94081|TRAJ36*01|Homo	23/23 nt	100	23	CAASAFSGANNLFF	TRA
TCGA-B6-A0IM	Primary Tumor	HWUSI-EAS631_106053656:4:1:15979:2993	AE000660|TRAV24*01|Homo	42/42 nt	100	42	M35619|TRAJ44*01|Homo	51/51 nt	100	51	CAWWGGTASKLTF	TRA
TCGA-B6-A0IM	Primary Tumor	HWUSI-EAS631_106053656:4:19:10351:14196	AE000660|TRAV29/DV5*01|Homo	30/30 nt	100	30	M94081|TRAJ36*01|Homo	54/54 nt	100	54	CAASAFSGANNLFF	TRA
TCGA-B6-A0IM	Primary Tumor	HWUSI-EAS631_106053656:3:88:10987:15620	AE000659|TRAV13-1*01|Homo	46/46 nt	100	46	M94081|TRAJ30*01|Homo	49/49 nt	100	49	CLLLCSNDLNRDDKIIF	TRA
TCGA-A2-A25D	Primary Tumor	HWI-ST718_114371741:7:1104:13938:8694	AE000658|TRAV1-2*01|Homo	58/58 nt	100	58	M35622|TRAJ34*01|Homo	40/40 nt	100	40	CAVRDYKLIF	TRA
TCGA-A2-A25D	Primary Tumor	HWI-ST718_114371741:7:2207:7111:165702	AE000658|TRAV3*01|Homo	70/70 nt	100	70	M94081|TRAJ8*01|Homo	27/27 nt	100	27	CAVSATGFQKLVF	TRA
TCGA-A2-A25D	Primary Tumor	HWI-ST718_114371741:7:2101:13787:188524	AE000659|TRAV5*01|Homo	31/31 nt	100	31	M94081|TRAJ42*01|Homo	63/63 nt	100	63	CAERDYGGSQGNLIF	TRA
TCGA-A2-A25D	Primary Tumor	HWI-ST718_114371741:7:2307:6518:5648	AE000659|TRAV5*01|Homo	31/31 nt	100	31	M94081|TRAJ42*01|Homo	63/63 nt	100	63	CAERDYGGSQGNLIF	TRA
TCGA-A2-A25D	Primary Tumor	HWI-ST718_114371741:7:1308:9453:152578	AE000660|TRAV26-2*01|Homo	33/33 nt	100	33	M94081|TRAJ38*01|Homo	56/56 nt	100	56	CTTASRGNYNAGNNRKLIW	TRA
TCGA-A2-A25D	Primary Tumor	HWI-ST718_114371741:7:1207:8024:95102	AE000658|TRAV1-2*01|Homo	40/40 nt	100	40	M94081|TRAJ29*01|Homo	54/54 nt	100	54	CAVRVPPGNTPLVF	TRA
TCGA-A2-A25D	Primary Tumor	HWI-ST718_114371741:7:2107:4597:196036	AE000660|TRAV20*01|Homo	27/27 nt	100	27	M94081|TRAJ11*01|Homo	50/50 nt	100	50	CAVYVYSTLTF	TRA
TCGA-A2-A25D	Primary Tumor	HWI-ST718_114371741:7:2202:20280:36101	AE000660|TRAV20*01|Homo	27/27 nt	100	27	M94081|TRAJ11*01|Homo	50/50 nt	100	50	CAVYVYSTLTF	TRA
TCGA-A2-A25D	Primary Tumor	HWI-ST718_114371741:7:2206:10877:72396	M35617|TRAV8-3*02|Homo	48/48 nt	100	48	M94081|TRAJ7*01|Homo	51/51 nt	100	51	CIGVMLLSTSVLWRNNRLAF	TRA
TCGA-BH-A0BP	Primary Tumor	HWI-EAS319_109290436:3:106:18016:20359	AE000658|TRAV3*01|Homo	76/76 nt	100	76	M94081|TRAJ15*02|Homo	20/20 nt	100	20	CCERLYNQAGTALIF	TRA
TCGA-BH-A0BP	Primary Tumor	HWI-EAS319_109290436:4:34:2437:9407	AE000660|TRAV29/DV5*01|Homo	73/73 nt	100	73	M94081|TRAJ49*01|Homo	25/25 nt	100	25	CAASPTGNQFYF	TRA
TCGA-BH-A0BP	Primary Tumor	HWI-EAS319_109290436:4:34:2437:9407	AE000660|TRAV29/DV5*01|Homo	59/59 nt	100	59	M94081|TRAJ49*01|Homo	39/39 nt	100	39	CAASPTGNQFYF	TRA
TCGA-BH-A0BP	Primary Tumor	HWI-EAS319_109290436:3:24:5293:3897	AE000661|TRAV38-2/DV8*01|Homo	69/69 nt	100	69	M94081|TRAJ49*01|Homo	30/30 nt	100	30	CAYRSANTGNQFYF	TRA
TCGA-A8-A091	Primary Tumor	HWUSI-EAS626_104454674:8:69:14403:4991	AE000661|TRAV38-2/DV8*01|Homo	38/39 nt	97.4359	38	M94081|TRAJ47*01|Homo	49/49 nt	100	49	CAYRRRGNKLVF	TRA
TCGA-A8-A091	Primary Tumor	HWUSI-EAS626_104454674:6:6:7860:15211	X04954|TRAV13-1*02|Homo	30/30 nt	100	30	M94081|TRAJ43*01|Homo	43/43 nt	100	43	CLLLCSKGGREDMRF	TRA
TCGA-A8-A08F	Primary Tumor	HWUSI-EAS710_104353086:1:3:13455:9188	AE000659|TRAV9-2*01|Homo	74/75 nt	98.6667	74	M94081|TRAJ26*01|Homo	27/27 nt	100	27	CALSDNYGQNFVF	TRA
TCGA-A8-A08F	Primary Tumor	HWUSI-EAS776_104635394:6:104:10437:6824	AE000659|TRAV9-2*01|Homo	67/67 nt	100	67	M94081|TRAJ26*01|Homo	35/35 nt	100	35	CALSDNYGQNFVF	TRA
TCGA-A8-A08F	Primary Tumor	HWUSI-EAS776_104635394:6:17:7228:16322	AE000659|TRAV9-2*01|Homo	67/67 nt	100	67	M94081|TRAJ26*01|Homo	35/35 nt	100	35	CALSDNYGQNFVF	TRA
TCGA-A8-A08F	Primary Tumor	HWUSI-EAS776_104635394:6:14:9970:6132	AE000660|TRAV29/DV5*01|Homo	65/65 nt	100	65	M94081|TRAJ26*01|Homo	29/29 nt	100	29	CAARVGYGQNFVF	TRA
TCGA-A8-A08F	Primary Tumor	HWUSI-EAS776_104635394:6:26:1786:19274	AE000659|TRAV14/DV4*02|Homo	26/26 nt	100	26	M94081|TRAJ54*01|Homo	59/60 nt	98.3333	59	CNERAQGIIQGAQKLAF	TRA
TCGA-A8-A08F	Primary Tumor	HWUSI-EAS710_104353086:1:3:16541:12237	AE000661|TRAV38-1*01|Homo	26/27 nt	96.2963	26	M94081|TRAJ54*01|Homo	58/58 nt	100	58	CAFMKVLIQGAQKLVF	TRA
TCGA-A8-A08F	Primary Tumor	HWUSI-EAS776_104635394:6:89:16260:18055	AE000659|TRAV13-2*01|Homo	43/43 nt	100	43	M94081|TRAJ39*01|Homo	58/58 nt	100	58	CAENNAGNMLTF	TRA
TCGA-A8-A08F	Primary Tumor	HWUSI-EAS709_104296605:8:64:18465:3261	AE000659|TRAV14/DV4*02|Homo	39/39 nt	100	39	M94081|TRAJ38*01|Homo	55/55 nt	100	55	CNERGPIAGNNRKLIW	TRA
TCGA-A8-A08F	Primary Tumor	HWUSI-EAS709_104296605:8:88:19505:7648	AE000659|TRAV9-2*01|Homo	44/44 nt	100	44	M94081|TRAJ26*01|Homo	58/58 nt	100	58	CALSDNYGQNFVF	TRA
TCGA-A8-A08F	Primary Tumor	HWUSI-EAS710_104353086:1:63:1135:16610	AE000660|TRAV17*01|Homo	27/27 nt	100	27	X05773|TRAJ17*01|Homo	53/53 nt	100	53	CATALPDAGNKLTF	TRA
TCGA-Z7-A8R6	Primary Tumor	HWI-ST514:146274248:C4VEDACXX:2:1314:13299:56629	AE000659|TRAV12-1*01|Homo	53/53 nt	100	53	M16747|TRAJ6*01|Homo	39/39 nt	100	39	CVVNIRPGGSYIPTF	TRA
TCGA-Z7-A8R6	Primary Tumor	HWI-ST514:146274248:C4VEDACXX:2:2203:20912:81234	AE000659|TRAV12-1*01|Homo	53/53 nt	100	53	M16747|TRAJ6*01|Homo	39/39 nt	100	39	CVVNIRPGGSYIPTF	TRA
TCGA-Z7-A8R6	Primary Tumor	HWI-ST434:147224318:C5KB7ACXX:3:1116:9701:96656	AE000660|TRAV27*01|Homo	36/36 nt	100	36	M94081|TRAJ49*01|Homo	53/53 nt	100	53	CAGTITGNQFYF	TRA
TCGA-AR-A252	Primary Tumor	HWI-ST444_116124218:6:1201:8087:189227	AE000658|TRAV3*01|Homo	71/71 nt	100	71	M35620|TRAJ40*01|Homo	21/21 nt	100	21	CASLVSGTYKYIF	TRA
TCGA-AR-A252	Primary Tumor	HWI-ST444_116124218:6:1204:13484:47705	AE000659|TRAV8-2*01|Homo	63/63 nt	100	63	AJ007774|TRAJ37*02|Homo	35/35 nt	100	35	CVFGSSNTGKLIF	TRA
TCGA-AR-A252	Primary Tumor	HWI-ST444_116124218:6:1301:14877:149287	AE000659|TRAV8-3*01|Homo	55/55 nt	100	55	M14905|TRAJ31*01|Homo	42/42 nt	100	42	CAVGAGNARLMF	TRA
TCGA-AR-A252	Primary Tumor	HWI-ST444_116124218:6:1106:2056:39374	X04954|TRAV13-1*02|Homo	75/75 nt	100	75	M94081|TRAJ45*01|Homo	20/22 nt	90.9091	20	CAAPFIGGGADGLTF	TRA
TCGA-AR-A252	Primary Tumor	HWI-ST444_116124218:6:2305:17894:126899	X04954|TRAV13-1*02|Homo	75/75 nt	100	75	M94081|TRAJ45*01|Homo	20/22 nt	90.9091	20	CAAPFIGGGADGLTF	TRA
TCGA-AR-A252	Primary Tumor	HWI-ST444_116124218:6:1106:16666:71988	AE000660|TRAV26-2*01|Homo	56/56 nt	100	56	M35619|TRAJ44*01|Homo	39/39 nt	100	39	CCCVLLHPERRTNTGTASKLTF	TRA
TCGA-AR-A252	Primary Tumor	HWI-ST444_116124218:6:2306:10371:133510	X04946|TRAV12-2*03|Homo	29/29 nt	100	29	M94081|TRAJ54*01|Homo	56/56 nt	100	56	CAYQGAQKLVF	TRA
TCGA-AR-A252	Primary Tumor	HWI-ST444_116124218:6:2106:15392:153468	M21624|TRAV14/DV4*03|Homo	25/25 nt	100	25	M94081|TRAJ52*01|Homo	64/64 nt	100	64	CAIPIWAGGTSYGKLTF	TRA
TCGA-AR-A252	Primary Tumor	HWI-ST444_116124218:6:2201:10114:177142	M97704|TRAV23/DV6*03|Homo	34/34 nt	100	34	AF532854|TRAJ32*02|Homo	58/58 nt	100	58	CAAGGGATNKLIF	TRA
TCGA-AR-A252	Primary Tumor	HWI-ST444_116124218:6:1206:5105:140841	AE000659|TRAV8-1*01|Homo	23/23 nt	100	23	M94081|TRAJ30*01|Homo	49/49 nt	100	49	CAVNEGWDDKIIF	TRA
TCGA-AR-A252	Primary Tumor	HWI-ST444_116124218:6:1206:5105:140841	AE000659|TRAV8-1*01|Homo	32/32 nt	100	32	M94081|TRAJ30*01|Homo	49/49 nt	100	49	CAVNEGWDDKIIF	TRA
TCGA-AR-A252	Primary Tumor	HWI-ST444_116124218:6:2207:7861:87308	AE000660|TRAV30*01|Homo	39/40 nt	97.5	39	X02886|TRAJ22*01|Homo	51/51 nt	100	51	CGTPVYSGSARQLTF	TRA
TCGA-AR-A252	Primary Tumor	HWI-ST444_116124218:6:1106:20210:116826	AE000659|TRAV14/DV4*02|Homo	29/29 nt	100	29	X02886|TRAJ22*01|Homo	56/56 nt	100	56	CAMREVSLDGSARQLTF	TRA
TCGA-AR-A252	Primary Tumor	HWI-ST444_116124218:6:2301:4385:195150	AE000659|TRAV14/DV4*02|Homo	29/29 nt	100	29	X02886|TRAJ22*01|Homo	56/56 nt	100	56	CAMREVSLDGSARQLTF	TRA
TCGA-AR-A252	Primary Tumor	HWI-ST444_116124218:6:1105:9152:40016	AE000660|TRAV26-2*01|Homo	30/31 nt	96.7742	30	X02886|TRAJ22*01|Homo	54/55 nt	98.1818	54	CCCVLLHPDGPPGSARQLTF	TRA
TCGA-AR-A252	Primary Tumor	HWI-ST444_116124218:6:1204:4088:6567	AE000660|TRAV26-2*01|Homo	31/31 nt	100	31	X02886|TRAJ22*01|Homo	55/55 nt	100	55	CCCVLLHPDGPPGSARQLTF	TRA
TCGA-AR-A252	Primary Tumor	HWI-ST444_116124218:6:1307:21170:190251	AE000660|TRAV26-2*01|Homo	30/31 nt	96.7742	30	X02886|TRAJ22*01|Homo	55/55 nt	100	55	CCCVLLHPDGPPGSARQLTF	TRA
TCGA-AR-A252	Primary Tumor	HWI-ST444_116124218:6:2206:17985:48664	AE000660|TRAV26-2*01|Homo	31/31 nt	100	31	X02886|TRAJ22*01|Homo	55/55 nt	100	55	CCCVLLHPDGPPGSARQLTF	TRA
TCGA-AC-A3TM	Primary Tumor	HWI-ST446:137378071:C1T0PACXX:5:1203:18877:41691	AE000659|TRAV5*01|Homo	66/66 nt	100	66	AJ007774|TRAJ37*02|Homo	31/31 nt	100	31	CAESYGSSNTGKLIF	TRA
TCGA-AC-A3TM	Primary Tumor	HWI-ST446:137378071:C1T0PACXX:5:2106:11892:15304	AE000659|TRAV5*01|Homo	66/66 nt	100	66	AJ007774|TRAJ37*02|Homo	31/31 nt	100	31	CAESYGSSNTGKLIF	TRA
TCGA-AC-A3TM	Primary Tumor	HWI-ST446:137378071:C1T0PACXX:5:2307:5317:73973	AE000659|TRAV5*01|Homo	66/66 nt	100	66	AJ007774|TRAJ37*02|Homo	31/31 nt	100	31	CAESYGSSNTGKLIF	TRA
TCGA-AC-A3TM	Primary Tumor	HWI-ST446:137378071:C1T0PACXX:6:1203:20317:89981	AE000659|TRAV5*01|Homo	66/66 nt	100	66	AJ007774|TRAJ37*02|Homo	31/31 nt	100	31	CAESYGSSNTGKLIF	TRA
TCGA-AC-A3TM	Primary Tumor	HWI-ST446:137378071:C1T0PACXX:5:1308:12137:39113	AE000659|TRAV8-6*02|Homo	63/65 nt	96.9231	63	M94081|TRAJ30*01|Homo	31/31 nt	100	31	CAVSXGDDKIIF	TRA
TCGA-AC-A3TM	Primary Tumor	HWI-ST446:137378071:C1T0PACXX:6:2303:1776:16194	AE000660|TRAV17*01|Homo	33/33 nt	100	33	AF532854|TRAJ32*02|Homo	60/60 nt	100	60	CATVPYGGATNKLIF	TRA
TCGA-AC-A3TM	Primary Tumor	HWI-ST446:137378071:C1T0PACXX:6:1310:20003:8285	AE000659|TRAV12-2*01|Homo	33/33 nt	100	33	M94081|TRAJ30*01|Homo	54/55 nt	98.1818	54	CAVNNRDGKIIF	TRA
TCGA-BH-A0BA	Primary Tumor	HWUSI-EAS404_105730715:7:101:15371:15871#0	M17656|TRAV12-3*02|Homo	60/60 nt	100	60	M94081|TRAJ53*01|Homo	40/40 nt	100	40	CAMKNSGGSNYKLTF	TRA
TCGA-BH-A0BA	Primary Tumor	HWUSI-EAS404_105730715:7:50:12839:19612#0	M17657|TRAV12-1*02|Homo	32/32 nt	100	32	M94081|TRAJ42*01|Homo	61/61 nt	100	61	CVVNRRYGGSQGNLIF	TRA
TCGA-BH-A0BA	Primary Tumor	HWUSI-EAS404_105730715:7:18:5273:13622#0	AE000658|TRAV2*01|Homo	30/30 nt	100	30	M94081|TRAJ8*01|Homo	60/60 nt	100	60	CAPLNTGFQKLVF	TRA
TCGA-A7-A2KD	Primary Tumor	HWI-ST495:137338861:C1V14ACXX:8:1110:11688:51853	AE000659|TRAV5*01|Homo	56/56 nt	100	56	AJ007774|TRAJ37*02|Homo	38/38 nt	100	38	CAETPSSSNTGKLIF	TRA
TCGA-A7-A2KD	Primary Tumor	HWI-ST495:137338861:C1V14ACXX:7:1305:6616:56447	AE000659|TRAV9-2*01|Homo	64/64 nt	100	64	M94081|TRAJ18*01|Homo	34/34 nt	100	34	CALRGGSTLGRLYF	TRA
TCGA-A7-A2KD	Primary Tumor	HWI-ST495:137338861:C1V14ACXX:7:2213:12924:76032	AE000658|TRAV1-2*01|Homo	24/24 nt	100	24	M94081|TRAJ33*01|Homo	57/57 nt	100	57	CAVMDSNYQLIW	TRA
TCGA-A7-A2KD	Primary Tumor	HWI-ST495:137338861:C1V14ACXX:8:1201:2005:3002	AE000659|TRAV12-1*01|Homo	21/21 nt	100	21	M94081|TRAJ7*01|Homo	54/54 nt	100	54	CGELHGNNRLAF	TRA
TCGA-B6-A0IK	Primary Tumor	HWUSI-EAS688_105514165:3:31:13959:11599#0	AE000658|TRAV3*01|Homo	64/64 nt	100	64	M94081|TRAJ38*01|Homo	24/24 nt	100	24	CCERQGVFTNAGNNRKLIW	TRA
TCGA-B6-A0IK	Primary Tumor	HWUSI-EAS688_105514165:3:109:10650:1653#0	AE000659|TRAV13-1*01|Homo	63/63 nt	100	63	M94081|TRAJ27*01|Homo	31/31 nt	100	31	CAASEGTNAGKSTF	TRA
TCGA-B6-A0IK	Primary Tumor	HWUSI-EAS688_105514165:3:33:19474:7802#0	M21626|TRAV14/DV4*01|Homo	64/64 nt	100	64	X58763|TRAJ23*02|Homo	33/33 nt	100	33	CNERCQGGKLIF	TRA
TCGA-B6-A0IK	Primary Tumor	HWUSI-EAS688_105514165:2:72:17609:4073#0	M21626|TRAV14/DV4*01|Homo	64/64 nt	100	64	X58763|TRAJ23*02|Homo	33/33 nt	100	33	CNERCQGGKLIF	TRA
TCGA-B6-A0IK	Primary Tumor	HWUSI-EAS688_105514165:1:7:14465:4936#0	X61070|TRAV36/DV7*02|Homo	55/55 nt	100	55	M35620|TRAJ40*01|Homo	35/35 nt	100	35	CAAVYLTSGTYKYIF	TRA
TCGA-B6-A0IK	Primary Tumor	HWUSI-EAS688_105514165:2:88:15256:17401#0	AE000661|TRAV38-2/DV8*01|Homo	64/64 nt	100	64	M94081|TRAJ57*01|Homo	28/28 nt	100	28	CAYYTGGGSEKLVF	TRA
TCGA-B6-A0IK	Primary Tumor	HWUSI-EAS688_105514165:3:14:18149:20218#0	X04946|TRAV12-2*03|Homo	25/25 nt	100	25	M94081|TRAJ52*01|Homo	62/62 nt	100	62	CAVNDGGTSYGKLTF	TRA
TCGA-B6-A0IK	Primary Tumor	HWUSI-EAS688_105514165:2:59:15381:7107#0	X04954|TRAV13-1*02|Homo	24/24 nt	100	24	M35620|TRAJ40*01|Homo	55/55 nt	100	55	CLLLCSRSGTYKYIF	TRA
TCGA-B6-A0IK	Primary Tumor	HWUSI-EAS688_105514165:3:32:5908:8185#0	AE000659|TRAV10*01|Homo	42/42 nt	100	42	X05775|TRAJ15*01|Homo	52/53 nt	98.1132	52	CVVSAGQAGTALIF	TRA
TCGA-E9-A1NC	Primary Tumor	HWI-ST144_118429546:1:1208:6448:147933	AE000658|TRAV2*01|Homo	67/67 nt	100	67	AJ007774|TRAJ37*02|Homo	26/26 nt	100	26	CAVGESNTGKLIF	TRA
TCGA-E9-A1NC	Primary Tumor	HWI-ST474_116588997:1:1106:16285:199067	AE000658|TRAV2*01|Homo	67/67 nt	100	67	AJ007774|TRAJ37*02|Homo	26/26 nt	100	26	CAVGESNTGKLIF	TRA
TCGA-E9-A1NC	Primary Tumor	HWI-ST474_116588997:1:2208:12029:52163	AE000658|TRAV2*01|Homo	67/67 nt	100	67	AJ007774|TRAJ37*02|Homo	26/26 nt	100	26	CAVGESNTGKLIF	TRA
TCGA-E9-A1NC	Primary Tumor	HWI-ST144_118429546:1:1202:16005:72015	AE000659|TRAV8-3*01|Homo	73/73 nt	100	73	M94081|TRAJ30*01|Homo	23/23 nt	100	23	CAVGAGRDDKIIF	TRA
TCGA-E9-A1NC	Primary Tumor	HWI-ST144_118429546:1:1306:7849:57111	AE000659|TRAV8-3*01|Homo	73/73 nt	100	73	M94081|TRAJ30*01|Homo	23/23 nt	100	23	CAVGAGRDDKIIF	TRA
TCGA-E9-A1NC	Primary Tumor	HWI-ST474_116588997:1:2205:12543:168356	AE000659|TRAV8-3*01|Homo	73/73 nt	100	73	M94081|TRAJ30*01|Homo	23/23 nt	100	23	CAVGAGRDDKIIF	TRA
TCGA-E9-A1NC	Primary Tumor	HWI-ST144_118429546:1:1106:10563:173573	AE000659|TRAV8-3*01|Homo	60/60 nt	100	60	M94081|TRAJ9*01|Homo	37/37 nt	100	37	CAVLTGGFKTIF	TRA
TCGA-E9-A1NC	Primary Tumor	HWI-ST144_118429546:1:1303:16965:31779	AE000659|TRAV8-3*01|Homo	60/60 nt	100	60	M94081|TRAJ9*01|Homo	37/37 nt	100	37	CAVLTGGFKTIF	TRA
TCGA-E9-A1NC	Primary Tumor	HWI-ST474_116588997:1:1108:11245:194937	AE000659|TRAV8-3*01|Homo	60/60 nt	100	60	M94081|TRAJ9*01|Homo	37/37 nt	100	37	CAVLTGGFKTIF	TRA
TCGA-E9-A1NC	Primary Tumor	HWI-ST474_116588997:1:1208:3468:193041	AE000659|TRAV8-3*01|Homo	60/60 nt	100	60	M94081|TRAJ9*01|Homo	37/37 nt	100	37	CAVLTGGFKTIF	TRA
TCGA-E9-A1NC	Primary Tumor	HWI-ST474_116588997:1:2301:15628:130731	AE000659|TRAV8-3*01|Homo	60/60 nt	100	60	M94081|TRAJ9*01|Homo	37/37 nt	100	37	CAVLTGGFKTIF	TRA
TCGA-E9-A1NC	Primary Tumor	HWI-ST474_116588997:1:1303:12375:194106	AE000659|TRAV14/DV4*02|Homo	61/62 nt	98.3871	61	X02886|TRAJ22*01|Homo	33/33 nt	100	33	CNERLISSGSARQLTF	TRA
TCGA-E9-A1NC	Primary Tumor	HWI-ST144_118429546:1:2205:4375:123427	M17658|TRAV13-2*02|Homo	30/30 nt	100	30	M94081|TRAJ39*01|Homo	54/54 nt	100	54	CAESFARDAGNMLTF	TRA
TCGA-E9-A1NC	Primary Tumor	HWI-ST144_118429546:1:1104:17644:93748	M17658|TRAV13-2*02|Homo	30/30 nt	100	30	M94081|TRAJ39*01|Homo	54/54 nt	100	54	CAESFARDAGNMLTF	TRA
TCGA-E9-A1NC	Primary Tumor	HWI-ST144_118429546:1:1306:7849:57111	AE000659|TRAV8-3*01|Homo	39/39 nt	100	39	M94081|TRAJ30*01|Homo	52/52 nt	100	52	CAVGAGRDDKIIF	TRA
TCGA-E9-A1NC	Primary Tumor	HWI-ST474_116588997:1:2205:12543:168356	AE000659|TRAV8-3*01|Homo	39/39 nt	100	39	M94081|TRAJ30*01|Homo	52/52 nt	100	52	CAVGAGRDDKIIF	TRA
TCGA-E9-A1NC	Primary Tumor	HWI-ST144_118429546:1:1202:16005:72015	AE000659|TRAV8-3*01|Homo	39/39 nt	100	39	M94081|TRAJ30*01|Homo	52/52 nt	100	52	CAVGAGRDDKIIF	TRA
TCGA-D8-A27P	Primary Tumor	HWI-ST144_115992511:8:1203:20226:130224	AE000660|TRAV20*01|Homo	29/29 nt	100	29	M94081|TRAJ26*01|Homo	59/59 nt	100	59	CAVQALDNYGQNFVF	TRA
TCGA-D8-A27P	Primary Tumor	HWI-ST144_115992511:8:1301:19301:116076	AE000660|TRAV20*01|Homo	29/29 nt	100	29	M94081|TRAJ26*01|Homo	59/59 nt	100	59	CAVQALDNYGQNFVF	TRA
TCGA-D8-A27P	Primary Tumor	HWI-ST144_115992511:8:1203:20226:130224	AE000660|TRAV20*01|Homo	24/24 nt	100	24	M94081|TRAJ26*01|Homo	59/59 nt	100	59	CAVQALDNYGQNFVF	TRA
TCGA-D8-A27P	Primary Tumor	HWI-ST144_115992511:8:1301:19301:116076	AE000660|TRAV20*01|Homo	24/24 nt	100	24	M94081|TRAJ26*01|Homo	59/59 nt	100	59	CAVQALDNYGQNFVF	TRA
TCGA-E2-A153	Primary Tumor	HWI-ST664_110089929:5:21:12075:56389	AE000659|TRAV13-1*01|Homo	44/44 nt	100	44	M94081|TRAJ9*01|Homo	55/55 nt	100	55	CAASDTGGFKTIF	TRA
TCGA-AN-A0FD	Primary Tumor	ILLUMINA-63A70C_105350422:2:16:16263:6709	X61070|TRAV36/DV7*02|Homo	64/65 nt	98.4615	64	M94081|TRAJ57*01|Homo	32/32 nt	100	32	CAVYQGGSEKLVF	TRA
TCGA-AN-A0FD	Primary Tumor	ILLUMINA-63A70C_105350422:1:25:16748:2569	M17657|TRAV12-1*02|Homo	43/43 nt	100	43	X02885|TRAJ12*01|Homo	51/51 nt	100	51	CVVNDNMDSSYKLIF	TRA
TCGA-BH-A0BZ	Primary Tumor	HWI-ST695_111215935:2:68:18422:177471	AE000659|TRAV6*01|Homo	59/59 nt	100	59	M94081|TRAJ43*01|Homo	29/29 nt	100	29	CALGEVGNDMRF	TRA
TCGA-BH-A0BZ	Primary Tumor	HWI-ST695_111215935:2:8:13040:22248	AE000659|TRAV12-1*01|Homo	59/59 nt	100	59	X02885|TRAJ12*01|Homo	37/37 nt	100	37	CVVSGDSSYKLIF	TRA
TCGA-BH-A0BZ	Primary Tumor	HWI-ST695_111215935:2:65:5761:9443	AE000659|TRAV8-2*01|Homo	65/65 nt	100	65	M94081|TRAJ29*01|Homo	34/34 nt	100	34	CVVSDNSGNTPLVF	TRA
TCGA-BH-A0BZ	Primary Tumor	HWI-ST695_111215935:2:6:16725:83243	AE000659|TRAV13-1*01|Homo	39/39 nt	100	39	M94081|TRAJ26*01|Homo	46/49 nt	93.8776	46	CAASIGGQNFFF	TRA
TCGA-BH-A0BZ	Primary Tumor	HWI-ST695_111215935:2:21:9685:49685	X63455|TRAV8-4*05|Homo	54/54 nt	100	54	M94081|TRAJ41*01|Homo	39/39 nt	100	39	CAVSERGSNSGYALNF	TRA
TCGA-BH-A0BZ	Primary Tumor	HWI-ST695_111215935:2:45:2966:182118	M17658|TRAV13-2*02|Homo	55/55 nt	100	55	X05775|TRAJ15*01|Homo	40/40 nt	100	40	CAAPNQAGTALIF	TRA
TCGA-BH-A0BZ	Primary Tumor	HWI-ST695_111215935:2:5:18457:98980	AE000660|TRAV17*01|Homo	77/77 nt	100	77	M94081|TRAJ10*01|Homo	20/20 nt	100	20	CATGITGGGNKLTF	TRA
TCGA-BH-A0BZ	Primary Tumor	HWI-ST695_111215935:2:4:5100:102353	AE000660|TRAV17*01|Homo	55/55 nt	100	55	M94081|TRAJ43*01|Homo	36/36 nt	100	36	CALHTNNNDMRF	TRA
TCGA-BH-A0BZ	Primary Tumor	HWI-ST695_111215935:2:8:17614:106088	AE000660|TRAV17*01|Homo	54/54 nt	100	54	M94081|TRAJ49*01|Homo	42/42 nt	100	42	CAIGGNQFYF	TRA
TCGA-BH-A0BZ	Primary Tumor	HWI-ST695_111215935:2:68:10279:141924	AE000660|TRAV21*01|Homo	73/73 nt	100	73	M94081|TRAJ36*01|Homo	23/23 nt	100	23	CAVYPGANNLFF	TRA
TCGA-BH-A0BZ	Primary Tumor	HWI-ST695_111215935:2:21:8956:188126	AE000660|TRAV21*01|Homo	56/56 nt	100	56	M94081|TRAJ47*01|Homo	41/41 nt	100	41	CCEREYGNKLVF	TRA
TCGA-BH-A0BZ	Primary Tumor	HWI-ST695_111215935:2:26:17431:56467	AE000661|TRAV41*01|Homo	55/55 nt	100	55	M94081|TRAJ52*01|Homo	45/45 nt	100	45	CAVNAGGTSYGKLTF	TRA
TCGA-BH-A0BZ	Primary Tumor	HWI-ST695_111215935:2:67:15090:27757	AE000661|TRAV41*01|Homo	55/55 nt	100	55	M94081|TRAJ52*01|Homo	44/44 nt	100	44	CAVNAGGTSYGKLTF	TRA
TCGA-BH-A0BZ	Primary Tumor	HWI-ST695_111215935:2:1:6033:168337	AE000661|TRAV41*01|Homo	55/55 nt	100	55	M94081|TRAJ52*01|Homo	45/45 nt	100	45	CAVNAGGTSYGKLTF	TRA
TCGA-BH-A0BZ	Primary Tumor	HWI-ST695_111215935:2:1:11687:66204	AE000661|TRAV41*01|Homo	52/52 nt	100	52	M94081|TRAJ47*01|Homo	46/47 nt	97.8723	46	CAVRLAYGNKLVF	TRA
TCGA-BH-A0BZ	Primary Tumor	HWI-ST695_111215935:2:68:7627:117136	AE000661|TRAV41*01|Homo	52/52 nt	100	52	M94081|TRAJ47*01|Homo	46/47 nt	97.8723	46	CAVRLAYGNKLVF	TRA
TCGA-BH-A0BZ	Primary Tumor	HWI-ST695_111215935:2:3:6234:45385	AE000660|TRAV17*01|Homo	47/47 nt	100	47	M94081|TRAJ43*01|Homo	52/52 nt	100	52	CATDGNNNDMRF	TRA
TCGA-BH-A0BZ	Primary Tumor	HWI-ST695_111215935:2:63:11091:162644	AE000660|TRAV17*01|Homo	39/39 nt	100	39	M35620|TRAJ40*01|Homo	56/56 nt	100	56	CATDRFSGTYKYIF	TRA
TCGA-BH-A0BZ	Primary Tumor	HWI-ST695_111215935:2:67:6078:97663	AE000660|TRAV35*01|Homo	45/45 nt	100	45	M35620|TRAJ40*01|Homo	52/52 nt	100	52	CRHLLLCWAGGTYKYIF	TRA
TCGA-BH-A0BZ	Primary Tumor	HWI-ST695_111215935:2:24:5749:97012	AE000659|TRAV6*01|Homo	34/34 nt	100	34	AJ007774|TRAJ37*02|Homo	59/59 nt	100	59	CSSLSGSSNTGKLIF	TRA
TCGA-BH-A0BZ	Primary Tumor	HWI-ST695_111215935:2:3:8107:71879	AE000658|TRAV2*01|Homo	32/32 nt	100	32	AF532854|TRAJ32*02|Homo	60/60 nt	100	60	CAVEDRSYGGATNKLIF	TRA
TCGA-BH-A0BZ	Primary Tumor	HWI-ST695_111215935:2:66:19363:84319	AE000658|TRAV2*01|Homo	32/32 nt	100	32	M94081|TRAJ32*01|Homo	61/64 nt	95.3125	61	CAVEDRSYGGATNKLIF	TRA
TCGA-BH-A0BZ	Primary Tumor	HWI-ST695_111215935:2:47:11784:92670	AE000660|TRAV17*01|Homo	28/28 nt	100	28	M94081|TRAJ28*01|Homo	62/62 nt	100	62	CARPSGAGSYQLTF	TRA
TCGA-BH-A0BZ	Primary Tumor	HWI-ST695_111215935:2:65:4890:62110	AE000659|TRAV9-2*01|Homo	32/34 nt	94.1176	32	M94081|TRAJ26*01|Homo	52/52 nt	100	52	CSLVAPRGYGQNFVF	TRA
TCGA-BH-A0BZ	Primary Tumor	HWI-ST695_111215935:2:47:7321:99350	AE000659|TRAV13-1*01|Homo	22/22 nt	100	22	X02886|TRAJ22*01|Homo	54/54 nt	100	54	CAAGGSSARQLTF	TRA
TCGA-BH-A0BZ	Primary Tumor	HWI-ST695_111215935:2:1:20249:5084	AE000659|TRAV16*01|Homo	23/23 nt	100	23	M94081|TRAJ21*01|Homo	54/54 nt	100	54	CALTPNNFNKFYF	TRA
TCGA-BH-A0BZ	Primary Tumor	HWI-ST695_111215935:2:45:2966:182118	AE000659|TRAV13-2*01|Homo	35/35 nt	100	35	X05775|TRAJ15*01|Homo	58/58 nt	100	58	CAAPNQAGTALIF	TRA
TCGA-BH-A0BZ	Primary Tumor	HWI-ST695_111215935:2:48:14439:40932	AE000659|TRAV10*01|Homo	36/36 nt	100	36	X05775|TRAJ15*01|Homo	56/56 nt	100	56	CVVSASQAGTALIF	TRA
TCGA-BH-A0BZ	Primary Tumor	HWI-ST695_111215935:2:22:4779:2905	AE000659|TRAV8-6*02|Homo	39/39 nt	100	39	M94081|TRAJ11*01|Homo	52/52 nt	100	52	CCELIFSGYSTLTF	TRA
TCGA-BH-A0BZ	Primary Tumor	HWI-ST695_111215935:2:25:12995:124390	AE000659|TRAV14/DV4*02|Homo	33/33 nt	100	33	M94081|TRAJ10*01|Homo	57/57 nt	100	57	CAMSPGGGNKLTF	TRA
TCGA-BH-A0BZ	Primary Tumor	HWI-ST695_111215935:2:48:18843:49343	AE000659|TRAV14/DV4*02|Homo	33/33 nt	100	33	M94081|TRAJ10*01|Homo	57/57 nt	100	57	CAMSPGGGNKLTF	TRA
TCGA-BH-A0BZ	Primary Tumor	HWI-ST695_111215935:2:8:20590:145235	M21626|TRAV14/DV4*01|Homo	33/33 nt	100	33	M94081|TRAJ10*01|Homo	55/57 nt	96.4912	55	CAMSPGGGNTLTF	TRA
TCGA-A8-A07J	Primary Tumor	HWUSI-EAS712_104341173:8:98:14853:7392	AE000658|TRAV1-1*01|Homo	71/72 nt	98.6111	71	M94081|TRAJ26*01|Homo	21/21 nt	100	21	CAADRGQNFVF	TRA
TCGA-A8-A07J	Primary Tumor	HWUSI-EAS635_104296613:5:114:3636:16691	AE000658|TRAV1-1*01|Homo	56/56 nt	100	56	M94081|TRAJ26*01|Homo	38/38 nt	100	38	CAADHGQNFVF	TRA
TCGA-A8-A07J	Primary Tumor	HWUSI-EAS712_104341173:8:98:14853:7392	AE000658|TRAV1-1*01|Homo	56/56 nt	100	56	M94081|TRAJ26*01|Homo	38/38 nt	100	38	CAADHGQNFVF	TRA
TCGA-A8-A07J	Primary Tumor	HWUSI-EAS712_104341173:8:40:19537:11024	AE000659|TRAV8-6*02|Homo	49/49 nt	100	49	M94081|TRAJ28*01|Homo	25/26 nt	96.1538	25	CAVPLGAGSYQLSF	TRA
TCGA-A8-A07J	Primary Tumor	HWUSI-EAS635_104296613:5:55:15949:5120	AE000660|TRAV35*01|Homo	29/29 nt	100	29	M94081|TRAJ48*01|Homo	56/56 nt	100	56	CAGRLFGNEKLTF	TRA
TCGA-A7-A3J1	Primary Tumor	HWI-ST720:137778353:C20VYACXX:2:2110:17466:83541	X04954|TRAV13-1*02|Homo	69/69 nt	100	69	M94081|TRAJ30*01|Homo	28/28 nt	100	28	CAGGDDKIIF	TRA
TCGA-A7-A3J1	Primary Tumor	HWI-ST720:137778353:C20VYACXX:2:1215:20107:50477	AE000661|TRAV38-1*01|Homo	61/61 nt	100	61	M94081|TRAJ57*01|Homo	37/37 nt	100	37	CAFMKHSGSEKLVF	TRA
TCGA-OL-A66I	Primary Tumor	HWI-ST474:138826102:D28YFACXX:7:1308:9416:98081	AE000658|TRAV3*01|Homo	73/73 nt	100	73	M94081|TRAJ37*01|Homo	20/20 nt	100	20	CAVREESGNTGKLIF	TRA
TCGA-OL-A66I	Primary Tumor	HWI-ST474:138826102:D28YFACXX:7:2114:5041:14832	AE000659|TRAV6*01|Homo	71/71 nt	100	71	AF532854|TRAJ32*02|Homo	23/23 nt	100	23	CALVEYGGATNKLIF	TRA
TCGA-OL-A66I	Primary Tumor	HWI-ST474:138826102:D28YFACXX:8:2108:15100:43547	AE000659|TRAV12-2*01|Homo	73/74 nt	98.6486	73	M94081|TRAJ37*01|Homo	26/26 nt	100	26	CAVTPGNTGKLIF	TRA
TCGA-OL-A66I	Primary Tumor	HWI-ST474:138826102:D28YFACXX:8:2204:5038:22067	AE000659|TRAV12-2*01|Homo	73/74 nt	98.6486	73	M94081|TRAJ37*01|Homo	26/26 nt	100	26	CAVTPGNTGKLIF	TRA
TCGA-OL-A66I	Primary Tumor	HWI-ST474:138826102:D28YFACXX:8:2108:4915:72485	AE000659|TRAV14/DV4*02|Homo	62/62 nt	100	62	M94081|TRAJ37*01|Homo	38/38 nt	100	38	CAMREAGNTGKLIF	TRA
TCGA-OL-A66I	Primary Tumor	HWI-ST474:138826102:D28YFACXX:7:2104:9920:88653	AE000659|TRAV14/DV4*02|Homo	62/62 nt	100	62	M94081|TRAJ37*01|Homo	38/38 nt	100	38	CAMREAGNTGKLIF	TRA
TCGA-OL-A66I	Primary Tumor	HWI-ST474:138826102:D28YFACXX:8:1201:2292:93768	AE000660|TRAV17*01|Homo	79/79 nt	100	79	X05775|TRAJ15*01|Homo	23/23 nt	100	23	CATDQAGTALIF	TRA
TCGA-OL-A66I	Primary Tumor	HWI-ST474:138826102:D28YFACXX:7:1116:11770:100328	AE000660|TRAV19*01|Homo	67/67 nt	100	67	M94081|TRAJ30*01|Homo	28/28 nt	100	28	CALSGKRDDKIIF	TRA
TCGA-OL-A66I	Primary Tumor	HWI-ST474:138826102:D28YFACXX:8:2215:19320:31236	AE000660|TRAV20*01|Homo	61/61 nt	100	61	M94081|TRAJ45*01|Homo	35/35 nt	100	35	CAVHPYSGGGADGLTF	TRA
TCGA-OL-A66I	Primary Tumor	HWI-ST474:138826102:D28YFACXX:8:2211:6203:70279	AE000660|TRAV36/DV7*01|Homo	63/63 nt	100	63	M94081|TRAJ47*01|Homo	33/33 nt	100	33	CAVEGGEYGNKLVF	TRA
TCGA-OL-A66I	Primary Tumor	HWI-ST474:138826102:D28YFACXX:7:1309:18828:89319	AE000660|TRAV20*01|Homo	42/42 nt	100	42	M94081|TRAJ49*01|Homo	53/53 nt	100	53	CCAGRDTGNQFYF	TRA
TCGA-OL-A66I	Primary Tumor	HWI-ST474:138826102:D28YFACXX:7:2113:3483:85873	AE000660|TRAV27*01|Homo	21/21 nt	100	21	M94081|TRAJ49*01|Homo	52/52 nt	100	52	CAGEQTGNQFYF	TRA
TCGA-OL-A66I	Primary Tumor	HWI-ST474:138826102:D28YFACXX:8:2215:19320:31236	AE000660|TRAV20*01|Homo	32/32 nt	100	32	M94081|TRAJ45*01|Homo	64/64 nt	100	64	CAVHPYSGGGADGLTF	TRA
TCGA-OL-A66I	Primary Tumor	HWI-ST474:138826102:D28YFACXX:7:1204:11718:20000	AE000660|TRAV26-1*01|Homo	23/24 nt	95.8333	23	M94081|TRAJ43*01|Homo	47/47 nt	100	47	CIVRLSNDMRF	TRA
TCGA-OL-A66I	Primary Tumor	HWI-ST474:138826102:D28YFACXX:7:1304:15509:77836	AE000660|TRAV26-1*01|Homo	23/24 nt	95.8333	23	M94081|TRAJ43*01|Homo	47/47 nt	100	47	CIVRLSNDMRF	TRA
TCGA-OL-A66I	Primary Tumor	HWI-ST474:138826102:D28YFACXX:7:2116:17188:38992	AE000660|TRAV27*01|Homo	19/19 nt	100	19	M94081|TRAJ37*01|Homo	57/57 nt	100	57	CAGARFTGNTGKLIF	TRA
TCGA-OL-A66I	Primary Tumor	HWI-ST474:138826102:D28YFACXX:8:1210:8192:64008	AE000659|TRAV12-2*01|Homo	24/26 nt	92.3077	24	M94081|TRAJ36*01|Homo	54/55 nt	98.1818	54	CAVTGANNLFF	TRA
TCGA-OL-A66I	Primary Tumor	HWI-ST474:138826102:D28YFACXX:8:2204:7157:27121	AE000660|TRAV30*01|Homo	41/41 nt	100	41	M35622|TRAJ34*01|Homo	50/50 nt	100	50	CGTEQGTDKLIF	TRA
TCGA-OL-A66I	Primary Tumor	HWI-ST474:138826102:D28YFACXX:7:2101:16120:45626	AE000660|TRAV24*01|Homo	26/26 nt	100	26	M94081|TRAJ26*01|Homo	60/60 nt	100	60	CARDNYGQNFVF	TRA
TCGA-E9-A1RG	Primary Tumor	HWI-ST729_114206772:2:1108:6575:13227	M17656|TRAV12-3*02|Homo	49/49 nt	100	49	M94081|TRAJ27*01|Homo	38/38 nt	100	38	CAGQRGTNAGKSTF	TRA
TCGA-E9-A1RG	Primary Tumor	HWI-ST729_114206772:3:1104:5884:18535	AE000659|TRAV12-3*01|Homo	48/49 nt	97.9592	48	M94081|TRAJ27*01|Homo	38/38 nt	100	38	CAGQRGTNAGKSTF	TRA
TCGA-E9-A1RG	Primary Tumor	HWI-ST729_114206772:3:2201:3829:60827	AE000660|TRAV35*01|Homo	38/38 nt	100	38	M94081|TRAJ45*01|Homo	62/62 nt	100	62	CAGLYSGGGADGLTF	TRA
TCGA-E9-A1RG	Primary Tumor	HWI-ST729_114206772:1:1102:14431:35284	AE000658|TRAV1-2*01|Homo	19/19 nt	100	19	M94081|TRAJ29*01|Homo	52/52 nt	100	52	CAVRDGVGNTPLVF	TRA
TCGA-S3-A6ZG	Primary Tumor	HWI-ST485:143300654:C2MNAACXX:6:1316:10688:30175	AE000659|TRAV16*01|Homo	70/70 nt	100	70	M94081|TRAJ7*01|Homo	28/28 nt	100	28	CALSAYGNNRLAF	TRA
TCGA-S3-A6ZG	Primary Tumor	HWI-ST485:143300654:C2MNAACXX:5:1214:12729:29580	AE000660|TRAV19*01|Homo	25/25 nt	100	25	M94081|TRAJ58*01|Homo	59/59 nt	100	59	CALSEARGETSGSRLTF	TRA
TCGA-S3-A6ZG	Primary Tumor	HWI-ST485:143300654:C2MNAACXX:6:2104:16996:24759	AE000660|TRAV19*01|Homo	25/25 nt	100	25	M94081|TRAJ58*01|Homo	59/59 nt	100	59	CALSEARGETSGSRLTF	TRA
TCGA-S3-A6ZG	Primary Tumor	HWI-ST485:143300654:C2MNAACXX:6:1208:7106:49605	AE000659|TRAV8-1*01|Homo	44/44 nt	100	44	M94081|TRAJ4*01|Homo	51/52 nt	98.0769	51	CAVRTFSGGYNKLIF	TRA
TCGA-EW-A1P8	Primary Tumor	HWI-ST514_114051246:6:2103:4789:142336	Y10410|TRAV6*05|Homo	76/76 nt	100	76	M94081|TRAJ29*01|Homo	23/23 nt	100	23	CAAGNTPLVF	TRA
TCGA-EW-A1P8	Primary Tumor	HWI-ST514_114051246:6:2207:16792:4643	Y10410|TRAV6*05|Homo	76/76 nt	100	76	M94081|TRAJ29*01|Homo	23/23 nt	100	23	CAAGNTPLVF	TRA
TCGA-EW-A1P8	Primary Tumor	HWI-ST514_114051246:8:1201:21332:37114	Y10410|TRAV6*05|Homo	76/76 nt	100	76	M94081|TRAJ29*01|Homo	23/23 nt	100	23	CAAGNTPLVF	TRA
TCGA-EW-A1P8	Primary Tumor	HWI-ST514_114051246:8:2108:13577:10882	Y10410|TRAV6*05|Homo	76/76 nt	100	76	M94081|TRAJ29*01|Homo	23/23 nt	100	23	CAAGNTPLVF	TRA
TCGA-EW-A1P8	Primary Tumor	HWI-ST514_114051246:7:1107:14371:97863	AE000659|TRAV14/DV4*02|Homo	66/66 nt	100	66	X02885|TRAJ12*01|Homo	24/24 nt	100	24	CNERVPGKDSSYKLIF	TRA
TCGA-EW-A1P8	Primary Tumor	HWI-ST514_114051246:8:2201:17542:150033	AE000659|TRAV14/DV4*02|Homo	66/66 nt	100	66	X02885|TRAJ12*01|Homo	24/24 nt	100	24	CNERVPGKDSSYKLIF	TRA
TCGA-EW-A1P8	Primary Tumor	HWI-ST514_114051246:8:2204:1250:118550	AE000659|TRAV14/DV4*02|Homo	66/66 nt	100	66	X02885|TRAJ12*01|Homo	24/24 nt	100	24	CNERVPGKDSSYKLIF	TRA
TCGA-EW-A1P8	Primary Tumor	HWI-ST434_117786517:4:1208:9777:26034	AE000660|TRAV17*01|Homo	68/69 nt	98.5507	68	M94081|TRAJ11*01|Homo	28/28 nt	100	28	CATVGDSGYSTLTF	TRA
TCGA-EW-A1P8	Primary Tumor	HWI-ST434_117786517:4:2302:15304:20777	AE000660|TRAV17*01|Homo	68/69 nt	98.5507	68	M94081|TRAJ11*01|Homo	28/28 nt	100	28	CATVGDSGYSTLTF	TRA
TCGA-EW-A1P8	Primary Tumor	HWI-ST434_117786517:4:2207:21168:175184	AE000661|TRAV38-2/DV8*01|Homo	74/74 nt	100	74	M94081|TRAJ23*01|Homo	23/23 nt	100	23	CAYRSRYNQGGKLIF	TRA
TCGA-EW-A1P8	Primary Tumor	HWI-ST434_117786517:4:1106:19340:194093	AE000659|TRAV13-1*01|Homo	42/43 nt	97.6744	42	M94081|TRAJ53*01|Homo	54/54 nt	100	54	CAAIRGSNYKLTF	TRA
TCGA-EW-A1P8	Primary Tumor	HWI-ST434_117786517:4:1106:19340:194093	AE000659|TRAV13-1*01|Homo	42/43 nt	97.6744	42	M94081|TRAJ53*01|Homo	54/54 nt	100	54	CAAIRGSNYKLTF	TRA
TCGA-EW-A1P8	Primary Tumor	HWI-ST434_117786517:4:2202:18798:134855	AE000659|TRAV10*01|Homo	41/41 nt	100	41	M94081|TRAJ45*01|Homo	55/55 nt	100	55	CVVSGGADGLTF	TRA
TCGA-A2-A0YE	Primary Tumor	HWI-ST466_110412888:2:48:9251:19678	AE000658|TRAV3*01|Homo	57/57 nt	100	57	M94081|TRAJ26*01|Homo	34/34 nt	100	34	CCERPRARDNYGQNFVF	TRA
TCGA-A2-A0YE	Primary Tumor	HWI-ST466_110412888:2:63:18541:51690	AE000659|TRAV9-2*01|Homo	66/66 nt	100	66	X02885|TRAJ12*01|Homo	24/24 nt	100	24	CALTPRGDSSYKLIF	TRA
TCGA-AC-A3OD	Primary Tumor	HWI-ST495_129147890:8:1107:3032:94223	AE000658|TRAV4*01|Homo	39/39 nt	100	39	M35620|TRAJ40*01|Homo	58/58 nt	100	58	CPTSGTYKYIF	TRA
TCGA-B6-A0I6	Primary Tumor	HWI-ST791_110417777:1:3:5757:13686	AE000660|TRAV19*01|Homo	75/75 nt	100	75	M94081|TRAJ42*01|Homo	25/25 nt	100	25	CALSEAYGGSQGNLIF	TRA
TCGA-B6-A0I6	Primary Tumor	HWI-ST791_110417777:1:61:14574:13169	AE000660|TRAV26-1*01|Homo	43/43 nt	100	43	M35620|TRAJ40*01|Homo	52/52 nt	100	52	CCVLLHRQSRVAGTYKYIF	TRA
TCGA-LD-A66U	Primary Tumor	HWI-ST467:143152466:D2GWEACXX:1:2215:9729:4770	M17657|TRAV12-1*02|Homo	68/68 nt	100	68	AC023226|TRAJ13*02|Homo	28/28 nt	100	28	CVVAPGGYQKVTF	TRA
TCGA-LD-A66U	Primary Tumor	HWI-ST467:143152466:D2GWEACXX:2:2208:5569:19419	AE000660|TRAV26-2*01|Homo	20/20 nt	100	20	M94081|TRAJ59*01|Homo	51/51 nt	100	51	CIPCGQEGNRKFTF	TRA
TCGA-5L-AAT1	Primary Tumor	HWI-ST489:146478129:C5A8LACXX:7:2207:13037:68927	AE000659|TRAV9-2*01|Homo	71/71 nt	100	71	M94081|TRAJ54*01|Homo	24/24 nt	100	24	CSGVIQGAQKLVF	TRA
TCGA-5L-AAT1	Primary Tumor	HWI-ST118:146274257:C4UKUACXX:3:1313:6266:76326	M17656|TRAV12-3*02|Homo	79/79 nt	100	79	M94081|TRAJ18*01|Homo	19/19 nt	100	19	CAFDRGSTLGRLYF	TRA
TCGA-5L-AAT1	Primary Tumor	HWI-ST118:146274257:C4UKUACXX:3:2101:20907:40191	M17656|TRAV12-3*02|Homo	79/79 nt	100	79	M94081|TRAJ18*01|Homo	19/19 nt	100	19	CAFDRGSTLGRLYF	TRA
TCGA-5L-AAT1	Primary Tumor	HWI-ST489:146478129:C5A8LACXX:7:1313:7715:70274	AE000661|TRAV38-2/DV8*01|Homo	49/49 nt	100	49	M94081|TRAJ48*01|Homo	43/43 nt	100	43	CAYRSGGDFGNEKLTF	TRA
TCGA-5L-AAT1	Primary Tumor	HWI-ST118:146274257:C4UKUACXX:6:1103:17504:99381	AE000659|TRAV14/DV4*02|Homo	19/19 nt	100	19	M94081|TRAJ57*01|Homo	59/59 nt	100	59	CAMRGIQGGSEKLVF	TRA
TCGA-5L-AAT1	Primary Tumor	HWI-ST489:146478129:C5A8LACXX:4:2113:7535:8234	AE000658|TRAV3*01|Homo	33/33 nt	100	33	AJ007774|TRAJ37*02|Homo	61/61 nt	100	61	CCERGHGSSNTGKLIF	TRA
TCGA-5L-AAT1	Primary Tumor	HWI-ST118:146274257:C4UKUACXX:3:2201:13910:18803	AE000658|TRAV4*01|Homo	49/49 nt	100	49	M94081|TRAJ29*01|Homo	51/51 nt	100	51	CLVGDSGNTPLVF	TRA
TCGA-5L-AAT1	Primary Tumor	HWI-ST118:146274257:C4UKUACXX:6:2315:3040:2817	M17656|TRAV12-3*02|Homo	20/20 nt	100	20	M94081|TRAJ24*02|Homo	60/60 nt	100	60	CNATDSWGKLQF	TRA
TCGA-5L-AAT1	Primary Tumor	HWI-ST118:146274257:C4UKUACXX:6:2301:4058:72147	M97704|TRAV23/DV6*03|Homo	29/29 nt	100	29	M94081|TRAJ20*01|Homo	50/50 nt	100	50	CAASMLTDYKLSF	TRA
TCGA-E2-A15P	Primary Tumor	HWUSI-EAS1567_108914686:4:83:7117:11972#0	AE000658|TRAV1-2*01|Homo	64/64 nt	100	64	AF532854|TRAJ32*02|Homo	32/32 nt	100	32	CLLPLCCERWSGATNKLIF	TRA
TCGA-E2-A15P	Primary Tumor	HWUSI-EAS1567_108914686:4:96:9214:17498#0	AE000660|TRAV19*01|Homo	49/49 nt	100	49	M94081|TRAJ30*01|Homo	43/43 nt	100	43	CSECPTMNRDDKIIF	TRA
TCGA-E2-A15P	Primary Tumor	HWUSI-EAS1567_108914686:3:115:18421:17485#0	K02777|TRAV8-4*06|Homo	25/25 nt	100	25	M94081|TRAJ57*01|Homo	56/56 nt	100	56	CAVSGPGGSEKLVF	TRA
TCGA-E2-A15P	Primary Tumor	HWUSI-EAS1567_108914686:4:119:11312:7028#0	K02777|TRAV8-4*06|Homo	25/25 nt	100	25	M94081|TRAJ57*01|Homo	56/56 nt	100	56	CAVSGPGGSEKLVF	TRA
TCGA-E2-A15P	Primary Tumor	HWUSI-EAS1567_108914686:4:25:15861:7227#0	AE000659|TRAV6*01|Homo	34/35 nt	97.1429	34	M94081|TRAJ49*01|Homo	50/50 nt	100	50	CRLSYLPLCARPGGGNQFYF	TRA
TCGA-E2-A15P	Primary Tumor	HWUSI-EAS1567_108914686:4:61:9615:18354#0	M27371|TRAV26-1*02|Homo	35/35 nt	100	35	M94081|TRAJ43*01|Homo	54/54 nt	100	54	CIVRASYNNNDMRF	TRA
TCGA-E2-A15P	Primary Tumor	HWUSI-EAS1567_108914686:4:63:19422:16884#0	AE000660|TRAV27*01|Homo	33/33 nt	100	33	M94081|TRAJ41*01|Homo	51/51 nt	100	51	CRRPGYALNF	TRA
TCGA-E2-A15P	Primary Tumor	HWUSI-EAS1567_108914686:4:106:14672:9431#0	AE000659|TRAV10*01|Homo	45/45 nt	100	45	M94081|TRAJ33*01|Homo	48/48 nt	100	48	CGYHMDSNYQLIW	TRA
TCGA-E9-A5FL	Primary Tumor	HWI-ST474:138826102:D28YFACXX:2:1303:12445:49779	X04946|TRAV12-2*03|Homo	63/63 nt	100	63	M94081|TRAJ36*01|Homo	29/29 nt	100	29	CAVGRAGANNLFF	TRA
TCGA-E9-A5FL	Primary Tumor	HWI-ST474:138826102:D28YFACXX:2:2307:15569:70464	AE000660|TRAV19*01|Homo	52/52 nt	100	52	M94081|TRAJ39*01|Homo	42/42 nt	100	42	CALSEAYVNNAGNMLTF	TRA
TCGA-E9-A5FL	Primary Tumor	HWI-ST474:138826102:D28YFACXX:2:1212:12185:61702	AE000661|TRAV38-2/DV8*01|Homo	33/33 nt	100	33	M94081|TRAJ42*01|Homo	53/53 nt	100	53	CISVLIGVTVREGGSQGNLIF	TRA
TCGA-E9-A5FL	Primary Tumor	HWI-ST474:138826102:D28YFACXX:2:1216:2472:59430	M21626|TRAV14/DV4*01|Homo	19/20 nt	95	19	M94081|TRAJ18*01|Homo	61/61 nt	100	61	CTSVQCDSKGVRGSTLGRLYF	TRA
TCGA-B6-A40C	Primary Tumor	HWI-ST495:137338861:C1V14ACXX:2:1301:9319:65092	AE000660|TRAV20*01|Homo	62/62 nt	100	62	M94081|TRAJ37*01|Homo	28/28 nt	100	28	CAVLFDGNTGKLIF	TRA
TCGA-B6-A40C	Primary Tumor	HWI-ST495:137338861:C1V14ACXX:2:2308:4230:44611	AE000660|TRAV21*01|Homo	52/52 nt	100	52	M94081|TRAJ36*01|Homo	43/43 nt	100	43	CAVWGTGANNLFF	TRA
TCGA-AN-A046	Primary Tumor	HWI-ST151_105913521:1:64:11366:192829	AE000658|TRAV1-2*01|Homo	69/69 nt	100	69	M94081|TRAJ32*01|Homo	27/28 nt	96.4286	27	CAVNMNYGGATNKLIF	TRA
TCGA-AN-A046	Primary Tumor	HWI-ST151_105913521:1:66:6107:154848	AE000658|TRAV3*01|Homo	73/73 nt	100	73	X02886|TRAJ22*01|Homo	22/22 nt	100	22	CAVRDLISSGSARQLTF	TRA
TCGA-AN-A046	Primary Tumor	HWI-ST151_105913521:1:61:15759:151378	AE000658|TRAV4*01|Homo	50/50 nt	100	50	M94081|TRAJ42*01|Homo	43/43 nt	100	43	CTTASWVTSAYGGSQGNLIF	TRA
TCGA-AN-A046	Primary Tumor	HWI-ST151_105913521:1:3:7015:159127	AE000659|TRAV8-1*01|Homo	78/78 nt	100	78	M94081|TRAJ49*01|Homo	20/20 nt	100	20	CAVNWNTGNQFYF	TRA
TCGA-AN-A046	Primary Tumor	HWI-ST151_105913521:1:7:16120:124566	AE000659|TRAV8-1*01|Homo	78/78 nt	100	78	M94081|TRAJ49*01|Homo	20/20 nt	100	20	CAVNWNTGNQFYF	TRA
TCGA-AN-A046	Primary Tumor	HWI-ST151_105913521:1:45:2314:96791	AE000659|TRAV8-3*01|Homo	70/70 nt	100	70	M94081|TRAJ38*01|Homo	26/26 nt	100	26	CAVGASNAGNNRKLIW	TRA
TCGA-AN-A046	Primary Tumor	HWI-ST151_105913521:1:61:12275:95121	X04954|TRAV13-1*02|Homo	50/50 nt	100	50	M94081|TRAJ26*01|Homo	44/44 nt	100	44	CAATPDNYGQNFVF	TRA
TCGA-AN-A046	Primary Tumor	HWI-ST151_105913521:1:23:5005:193770	AE000659|TRAV14/DV4*02|Homo	73/73 nt	100	73	AJ007774|TRAJ37*02|Homo	22/23 nt	95.6522	22	CAMREVVSSNTGQLIF	TRA
TCGA-AN-A046	Primary Tumor	HWI-ST151_105913521:1:8:17498:170768	AE000660|TRAV36/DV7*01|Homo	53/53 nt	100	53	M94081|TRAJ43*01|Homo	44/44 nt	100	44	CAGHNNNDMRF	TRA
TCGA-AN-A046	Primary Tumor	HWI-ST151_105913521:1:26:17123:158899	AE000660|TRAV26-2*01|Homo	19/19 nt	100	19	M94081|TRAJ57*01|Homo	59/59 nt	100	59	CILSGQGGSEKLVF	TRA
TCGA-AN-A046	Primary Tumor	HWI-ST151_105913521:1:66:16809:193808	AE000659|TRAV8-3*01|Homo	34/34 nt	100	34	M94081|TRAJ48*01|Homo	59/59 nt	100	59	CAVGHNFGNEKLTF	TRA
TCGA-AN-A046	Primary Tumor	HWI-ST151_105913521:1:28:14466:170144	AE000660|TRAV35*01|Homo	30/30 nt	100	30	M35620|TRAJ40*01|Homo	52/52 nt	100	52	CRHLLLCWPGTYKYIF	TRA
TCGA-AN-A046	Primary Tumor	HWI-ST151_105913521:1:44:2200:178193	AE000660|TRAV29/DV5*01|Homo	25/26 nt	96.1538	25	AJ007774|TRAJ37*02|Homo	61/61 nt	100	61	CAAKGTGSSNTGKLIF	TRA
TCGA-AN-A046	Primary Tumor	HWI-ST151_105913521:1:8:12128:162260	X04946|TRAV12-2*03|Homo	22/22 nt	100	22	X02886|TRAJ22*01|Homo	55/55 nt	100	55	CAVTRGSARQLTF	TRA
TCGA-AN-A046	Primary Tumor	HWI-ST151_105913521:1:5:3260:108790	AE000659|TRAV14/DV4*02|Homo	46/46 nt	100	46	X02886|TRAJ22*01|Homo	49/49 nt	100	49	CAMREGQSSARQLTF	TRA
TCGA-AN-A046	Primary Tumor	HWI-ST151_105913521:1:4:19104:61965	AE000660|TRAV23/DV6*01|Homo	45/45 nt	100	45	M94081|TRAJ10*01|Homo	50/50 nt	100	50	CSKPSILTGGGNKLTF	TRA
TCGA-AN-A046	Primary Tumor	HWI-ST151_105913521:1:65:6733:72130	AE000660|TRAV27*01|Homo	48/48 nt	100	48	M94081|TRAJ10*01|Homo	50/50 nt	100	50	CAGGLTGGGNKLTF	TRA
TCGA-AN-A046	Primary Tumor	HWI-ST151_105913521:1:28:8511:68158	AE000660|TRAV27*01|Homo	48/48 nt	100	48	M94081|TRAJ10*01|Homo	50/50 nt	100	50	CAGGLTGGGNKLTF	TRA
TCGA-E9-A5FK	Primary Tumor	HWI-ST791:138827774:D21W4ACXX:7:1309:17841:67822	AE000660|TRAV27*01|Homo	54/54 nt	100	54	M94081|TRAJ20*01|Homo	40/40 nt	100	40	CAGEQYDYKLSF	TRA
TCGA-E9-A5FK	Primary Tumor	HWI-ST791:138827774:D21W4ACXX:8:1112:18706:28203	AE000660|TRAV29/DV5*01|Homo	74/74 nt	100	74	M35619|TRAJ44*01|Homo	20/20 nt	100	20	CSVLLCSKGATGTASKLTF	TRA
TCGA-E9-A5FK	Primary Tumor	HWI-ST791:138827774:D21W4ACXX:8:1107:8030:72425	AE000661|TRAV38-2/DV8*01|Homo	58/58 nt	100	58	M94081|TRAJ57*01|Homo	38/38 nt	100	38	CAYKWGGSEKLVF	TRA
TCGA-E9-A5FK	Primary Tumor	HWI-ST791:138827774:D21W4ACXX:8:1107:5789:69339	AE000660|TRAV21*01|Homo	23/23 nt	100	23	M94081|TRAJ41*01|Homo	54/54 nt	100	54	CAVRQDSGYALNF	TRA
TCGA-E9-A5FK	Primary Tumor	HWI-ST791:138827774:D21W4ACXX:7:2210:15499:81862	AE000660|TRAV26-2*01|Homo	35/35 nt	100	35	M94081|TRAJ36*01|Homo	59/59 nt	100	59	CIDQTGANNLFF	TRA
TCGA-E9-A5FK	Primary Tumor	HWI-ST791:138827774:D21W4ACXX:7:2302:8830:37145	AE000660|TRAV26-2*01|Homo	35/35 nt	100	35	M94081|TRAJ36*01|Homo	59/59 nt	100	59	CIDQTGANNLFF	TRA
TCGA-E9-A5FK	Primary Tumor	HWI-ST791:138827774:D21W4ACXX:8:2205:17496:46335	AE000659|TRAV9-2*01|Homo	20/20 nt	100	20	M14905|TRAJ31*01|Homo	52/52 nt	100	52	CALGVKNNARLMF	TRA
TCGA-E9-A5FK	Primary Tumor	HWI-ST791:138827774:D21W4ACXX:7:2210:2008:93013	M17657|TRAV12-1*02|Homo	25/25 nt	100	25	M94081|TRAJ20*01|Homo	57/57 nt	100	57	CVVIRSNDYKLSF	TRA
TCGA-E9-A5FK	Primary Tumor	HWI-ST791:138827774:D21W4ACXX:7:1205:1278:13006	AE000660|TRAV21*01|Homo	37/37 nt	100	37	X05773|TRAJ17*01|Homo	59/59 nt	100	59	CAVRMIKAAGNKLTF	TRA
TCGA-E9-A5FK	Primary Tumor	HWI-ST791:138827774:D21W4ACXX:7:1104:20743:20690	AE000661|TRAV38-2/DV8*01|Homo	39/39 nt	100	39	M94081|TRAJ13*01|Homo	61/62 nt	98.3871	61	CAYRKSGGYQKVTF	TRA
TCGA-E9-A227	Primary Tumor	HWI-ST467_114519188:5:1203:17767:45844	M17657|TRAV12-1*02|Homo	76/77 nt	98.7013	76	M94081|TRAJ20*01|Homo	22/22 nt	100	22	CVVNSDYKLSF	TRA
TCGA-E9-A227	Primary Tumor	HWI-ST467_114519188:6:2202:17446:184640	X04946|TRAV12-2*03|Homo	82/82 nt	100	82	M94081|TRAJ4*01|Homo	19/20 nt	95	19	CISGGYNKLIF	TRA
TCGA-E9-A227	Primary Tumor	HWI-ST467_114519188:6:2108:3803:70115	X04946|TRAV12-2*03|Homo	82/82 nt	100	82	M94081|TRAJ4*01|Homo	19/20 nt	95	19	CISGGYNKLIF	TRA
TCGA-E9-A227	Primary Tumor	HWI-ST467_114519188:5:2207:6963:33422	AE000659|TRAV9-2*01|Homo	52/52 nt	100	52	M94081|TRAJ48*01|Homo	43/43 nt	100	43	CALSHFGNEKLTF	TRA
TCGA-E9-A227	Primary Tumor	HWI-ST467_114519188:6:1105:12056:128434	X02850|TRAV8-6*01|Homo	59/59 nt	100	59	M35622|TRAJ34*01|Homo	39/39 nt	100	39	CAVSEDTDKLIF	TRA
TCGA-E9-A227	Primary Tumor	HWI-ST467_114519188:4:2201:3918:61797	X04954|TRAV13-1*02|Homo	27/27 nt	100	27	M94081|TRAJ39*01|Homo	59/59 nt	100	59	CVNNAGNMLTF	TRA
TCGA-E9-A227	Primary Tumor	HWI-ST467_114519188:4:1106:17347:18734	AE000660|TRAV26-1*01|Homo	38/38 nt	100	38	M94081|TRAJ20*01|Homo	55/55 nt	100	55	CCVLLHRQSRSNDYKLSF	TRA
TCGA-E9-A227	Primary Tumor	HWI-ST467_114519188:4:1102:6945:33206	AE000660|TRAV21*01|Homo	51/51 nt	100	51	AC023226|TRAJ13*02|Homo	52/52 nt	100	52	CAVNSGGYQKVTF	TRA
TCGA-BH-A0B7	Primary Tumor	HWUSI-EAS677_109110875:1:62:4938:13432#0	AE000658|TRAV3*01|Homo	49/49 nt	100	49	AC023226|TRAJ13*02|Homo	42/42 nt	100	42	CAVRDLSRGGYQKVTF	TRA
TCGA-BH-A0B7	Primary Tumor	HWUSI-EAS677_109110875:1:5:2865:16238#0	AE000658|TRAV4*01|Homo	77/77 nt	100	77	M94081|TRAJ21*01|Homo	26/26 nt	100	26	CLVGDNFNKFYF	TRA
TCGA-BH-A0B7	Primary Tumor	HWUSI-EAS677_109110875:1:39:10955:11786#0	AE000659|TRAV9-2*01|Homo	66/67 nt	98.5075	66	M94081|TRAJ49*01|Homo	28/28 nt	100	28	CALSLSNTGNQFYF	TRA
TCGA-BH-A0B7	Primary Tumor	HWUSI-EAS677_109110875:1:49:2710:17741#0	AE000659|TRAV9-2*01|Homo	65/65 nt	100	65	M94081|TRAJ42*01|Homo	33/33 nt	100	33	CSDLNYGGSQGNLIF	TRA
TCGA-BH-A0B7	Primary Tumor	HWUSI-EAS677_109110875:2:17:10160:21143#0	AE000659|TRAV9-2*01|Homo	67/67 nt	100	67	M94081|TRAJ49*01|Homo	19/19 nt	100	19	CALSXXXXGNQFYF	TRA
TCGA-BH-A0B7	Primary Tumor	HWUSI-EAS677_109110875:2:116:17696:10910#0	AE000659|TRAV16*01|Homo	74/74 nt	100	74	M94081|TRAJ57*01|Homo	23/23 nt	100	23	CALSSTQGGSEKLVF	TRA
TCGA-BH-A0B7	Primary Tumor	HWUSI-EAS677_109110875:1:20:12833:19037#0	AE000660|TRAV22*01|Homo	55/55 nt	100	55	M94081|TRAJ50*01|Homo	39/39 nt	100	39	CAVDPKTSYDKVIF	TRA
TCGA-BH-A0B7	Primary Tumor	HWUSI-EAS677_109110875:2:12:9863:17656#0	AE000660|TRAV24*01|Homo	67/67 nt	100	67	M94081|TRAJ45*01|Homo	30/30 nt	100	30	CAFWGGADGLTF	TRA
TCGA-BH-A0B7	Primary Tumor	HWUSI-EAS677_109110875:2:109:3658:6023#0	AE000660|TRAV29/DV5*01|Homo	50/50 nt	100	50	X02886|TRAJ22*01|Homo	45/45 nt	100	45	CAASGLSGSARQLTF	TRA
TCGA-BH-A0B7	Primary Tumor	HWUSI-EAS677_109110875:2:77:16864:17224#0	AE000660|TRAV36/DV7*01|Homo	74/74 nt	100	74	M94081|TRAJ50*01|Homo	28/28 nt	100	28	CAVKTSYDKVIF	TRA
TCGA-BH-A0B7	Primary Tumor	HWUSI-EAS677_109110875:2:22:12687:6173#0	AE000660|TRAV26-1*01|Homo	29/29 nt	100	29	M94081|TRAJ50*01|Homo	60/60 nt	100	60	CTIASSELKTSYDKVIF	TRA
TCGA-BH-A0B7	Primary Tumor	HWUSI-EAS677_109110875:2:27:2416:13974#0	X04946|TRAV12-2*03|Homo	28/28 nt	100	28	M94081|TRAJ47*01|Homo	49/49 nt	100	49	CAVNGGNKLVF	TRA
TCGA-BH-A0B7	Primary Tumor	HWUSI-EAS677_109110875:2:117:4144:14867#0	AE000660|TRAV35*01|Homo	38/38 nt	100	38	M94081|TRAJ33*01|Homo	53/53 nt	100	53	CRHLLLCWADQYMDSNYQLIW	TRA
TCGA-BH-A0B7	Primary Tumor	HWUSI-EAS677_109110875:2:60:19497:4849#0	AE000659|TRAV14/DV4*02|Homo	23/23 nt	100	23	M94081|TRAJ33*01|Homo	55/55 nt	100	55	CAMRYDSNYQLIW	TRA
TCGA-BH-A0B7	Primary Tumor	HWUSI-EAS677_109110875:2:117:1803:19116#0	AE000659|TRAV8-1*01|Homo	35/35 nt	100	35	M94081|TRAJ32*01|Homo	47/47 nt	100	47	CAVNSPGNKLIF	TRA
TCGA-BH-A0B7	Primary Tumor	HWUSI-EAS677_109110875:2:93:11138:16290#0	X04946|TRAV12-2*03|Homo	44/44 nt	100	44	M14905|TRAJ31*01|Homo	46/46 nt	100	46	CAVRGARLMF	TRA
TCGA-BH-A0B7	Primary Tumor	HWUSI-EAS677_109110875:1:46:18768:16678#0	AE000659|TRAV14/DV4*02|Homo	49/50 nt	98	49	M94081|TRAJ29*01|Homo	42/42 nt	100	42	CAMRGDREAGNTPLVF	TRA
TCGA-BH-A0B7	Primary Tumor	HWUSI-EAS677_109110875:2:114:11299:13994#0	AE000659|TRAV8-6*02|Homo	43/45 nt	95.5556	43	M94081|TRAJ23*01|Homo	57/58 nt	98.2759	57	CTSVLWYTREESLS	TRA
TCGA-BH-A0B7	Primary Tumor	HWUSI-EAS677_109110875:1:67:4986:15110#0	X04946|TRAV12-2*03|Homo	46/46 nt	100	46	M94081|TRAJ11*01|Homo	49/49 nt	100	49	CAVSPNSGYSTLTF	TRA
TCGA-BH-A0B7	Primary Tumor	HWUSI-EAS677_109110875:1:116:10743:14658#0	X04954|TRAV13-1*02|Homo	29/29 nt	100	29	M94081|TRAJ10*01|Homo	57/57 nt	100	57	CAPAGGGNKLTF	TRA
TCGA-BH-A0B7	Primary Tumor	HWUSI-EAS677_109110875:1:42:4379:11078#0	AE000659|TRAV8-2*01|Homo	19/19 nt	100	19	M94081|TRAJ8*01|Homo	58/58 nt	100	58	CVVRGVENTGFQKLVF	TRA
TCGA-A8-A06O	Primary Tumor	HWUSI-EAS685_104609568:6:11:16161:3687	AE000659|TRAV12-2*01|Homo	58/58 nt	100	58	AJ007774|TRAJ37*02|Homo	35/35 nt	100	35	CREFGPSNTGKLIF	TRA
TCGA-A8-A06O	Primary Tumor	HWUSI-EAS685_104609568:4:96:5138:14616	AE000660|TRAV25*01|Homo	57/57 nt	100	57	M94081|TRAJ48*01|Homo	38/38 nt	100	38	CAGRESNFGNEKLTF	TRA
TCGA-A8-A06O	Primary Tumor	HWUSI-EAS685_104609568:5:59:3152:9973	AE000661|TRAV41*01|Homo	58/58 nt	100	58	M94081|TRAJ42*01|Homo	37/37 nt	100	37	CAVSLNYGGSQGNLIF	TRA
TCGA-A8-A06O	Primary Tumor	HWUSI-EAS685_104609568:5:103:2376:5407	AE000658|TRAV2*01|Homo	20/20 nt	100	20	M94081|TRAJ38*01|Homo	62/62 nt	100	62	CCGGVNAGNNRKLIW	TRA
TCGA-C8-A12X	Primary Tumor	HWI-ST144_110867773:6:62:12031:117031	M21626|TRAV14/DV4*01|Homo	60/61 nt	98.3607	60	M94081|TRAJ30*01|Homo	34/34 nt	100	34	CAMREGDDKIIF	TRA
TCGA-C8-A12X	Primary Tumor	HWI-ST144_110867773:6:7:1866:65892	M17656|TRAV12-3*02|Homo	41/41 nt	100	41	M94081|TRAJ30*01|Homo	52/53 nt	98.1132	52	CAMSPGEDDKIIF	TRA
TCGA-C8-A12X	Primary Tumor	HWI-ST144_110867773:6:1:1224:192150	AE000658|TRAV4*01|Homo	37/37 nt	100	37	M94081|TRAJ27*01|Homo	56/56 nt	100	56	CCVLLPRPTNAGKSTF	TRA
TCGA-LD-A9QF	Primary Tumor	HWI-ST118:146274257:C4UKUACXX:6:1209:17010:85030	M17659|TRAV2*02|Homo	68/68 nt	100	68	M14905|TRAJ31*01|Homo	32/32 nt	100	32	CAVANNARLMF	TRA
TCGA-LD-A9QF	Primary Tumor	HWI-ST118:146274257:C4UKUACXX:3:1104:1808:36502	AE000659|TRAV12-1*01|Homo	62/62 nt	100	62	M94081|TRAJ9*01|Homo	29/29 nt	100	29	CVVNRGGTGGFKTIF	TRA
TCGA-LD-A9QF	Primary Tumor	HWI-ST118:146274257:C4UKUACXX:3:1203:8504:21314	AE000659|TRAV12-1*01|Homo	62/62 nt	100	62	M94081|TRAJ9*01|Homo	29/29 nt	100	29	CVVNRGGTGGFKTIF	TRA
TCGA-LD-A9QF	Primary Tumor	HWI-ST118:146274257:C4UKUACXX:3:2114:12593:83374	AE000659|TRAV12-2*01|Homo	75/76 nt	98.6842	75	M94081|TRAJ49*01|Homo	20/20 nt	100	20	CAFYTGNQFYF	TRA
TCGA-LD-A9QF	Primary Tumor	HWI-ST489:146478129:C5A8LACXX:7:2316:13183:90850	AE000659|TRAV9-2*01|Homo	68/68 nt	100	68	M94081|TRAJ37*01|Homo	29/29 nt	100	29	CALEGSGNTGKLIF	TRA
TCGA-LD-A9QF	Primary Tumor	HWI-ST489:146478129:C5A8LACXX:4:1107:17811:97417	AE000660|TRAV17*01|Homo	56/56 nt	100	56	M94081|TRAJ45*01|Homo	41/41 nt	100	41	CATDRGGGADGLTF	TRA
TCGA-LD-A9QF	Primary Tumor	HWI-ST118:146274257:C4UKUACXX:6:2109:19559:93200	AE000659|TRAV8-6*02|Homo	33/33 nt	100	33	M94081|TRAJ53*01|Homo	59/59 nt	100	59	CAVRRGGGGSNYKLTF	TRA
TCGA-LD-A9QF	Primary Tumor	HWI-ST118:146274257:C4UKUACXX:6:2202:12210:8685	AE000661|TRAV41*01|Homo	39/39 nt	100	39	M94081|TRAJ45*01|Homo	57/57 nt	100	57	CAVRPGGGADGLTF	TRA
TCGA-LD-A9QF	Primary Tumor	HWI-ST489:146478129:C5A8LACXX:7:1201:6967:31064	AE000661|TRAV41*01|Homo	39/39 nt	100	39	M94081|TRAJ45*01|Homo	57/57 nt	100	57	CAVRPGGGADGLTF	TRA
TCGA-LD-A9QF	Primary Tumor	HWI-ST489:146478129:C5A8LACXX:7:2106:10942:97547	AE000658|TRAV2*01|Homo	22/22 nt	100	22	M35620|TRAJ40*01|Homo	59/59 nt	100	59	CCGGRTSGTYKYIF	TRA
TCGA-LD-A9QF	Primary Tumor	HWI-ST118:146274257:C4UKUACXX:3:2301:1407:60478	AE000659|TRAV10*01|Homo	20/20 nt	100	20	M94081|TRAJ20*01|Homo	50/50 nt	100	50	CGEREPDYKLSF	TRA
TCGA-LD-A9QF	Primary Tumor	HWI-ST489:146478129:C5A8LACXX:7:2214:11453:51465	AE000659|TRAV6*01|Homo	31/31 nt	100	31	M94081|TRAJ18*01|Homo	58/58 nt	100	58	CALDGGSTLGRLYF	TRA
TCGA-LD-A9QF	Primary Tumor	HWI-ST489:146478129:C5A8LACXX:4:2312:1263:95988	AE000660|TRAV22*01|Homo	41/41 nt	100	41	X05775|TRAJ15*01|Homo	56/56 nt	100	56	CAVSQAGTALIF	TRA
TCGA-LD-A9QF	Primary Tumor	HWI-ST489:146478129:C5A8LACXX:4:1211:14068:17862	AE000661|TRAV38-2/DV8*01|Homo	33/33 nt	100	33	M94081|TRAJ5*01|Homo	60/60 nt	100	60	CASMDTGRRALTF	TRA
TCGA-AR-A2LO	Primary Tumor	HWI-ST442_119206978:6:1301:1967:48296	AE000661|TRAV39*01|Homo	32/32 nt	100	32	M94081|TRAJ30*01|Homo	46/46 nt	100	46	CAVDMVSFTPMNRDDKIIF	TRA
TCGA-AR-A2LO	Primary Tumor	HWI-ST442_119206978:6:2205:13004:188199	AE000661|TRAV39*01|Homo	36/36 nt	100	36	M94081|TRAJ30*01|Homo	46/46 nt	100	46	CAVDMDSFTPMNRDDKIIF	TRA
TCGA-A8-A08H	Primary Tumor	HWUSI-EAS227_104354553:2:76:15936:1048	AE000658|TRAV1-2*01|Homo	75/75 nt	100	75	M94081|TRAJ33*01|Homo	25/25 nt	100	25	CAVMDSNYQLIW	TRA
TCGA-A8-A08H	Primary Tumor	HWUSI-EAS227_104354553:2:103:2624:1724	X04946|TRAV12-2*03|Homo	79/79 nt	100	79	M94081|TRAJ26*01|Homo	19/19 nt	100	19	CAADNYGQNFVF	TRA
TCGA-A8-A08H	Primary Tumor	HWUSI-EAS227_104354553:2:42:9681:18288	X04946|TRAV12-2*03|Homo	65/65 nt	100	65	M94081|TRAJ27*01|Homo	32/32 nt	100	32	CAVTPNAGKSTF	TRA
TCGA-A8-A08H	Primary Tumor	HWUSI-EAS227_104354553:1:15:10682:17182	M17656|TRAV12-3*02|Homo	59/59 nt	100	59	M94081|TRAJ15*02|Homo	37/37 nt	100	37	CAMSDGQAGTALIF	TRA
TCGA-A8-A08H	Primary Tumor	HWUSI-EAS227_104354553:3:84:13804:8485	AE000660|TRAV21*01|Homo	72/72 nt	100	72	M94081|TRAJ30*01|Homo	24/24 nt	100	24	CAVDHDKIIF	TRA
TCGA-A8-A08H	Primary Tumor	HWUSI-EAS227_104354553:2:85:1798:12574	M27371|TRAV26-1*02|Homo	51/51 nt	100	51	M94081|TRAJ23*01|Homo	48/48 nt	100	48	CIVSYNQGGKLIF	TRA
TCGA-A8-A08H	Primary Tumor	HWUSI-EAS227_104354553:1:77:2359:6756	X04946|TRAV12-2*03|Homo	26/27 nt	96.2963	26	M94081|TRAJ53*01|Homo	57/57 nt	100	57	CASHYLGYSGGSNYKLTF	TRA
TCGA-A8-A08H	Primary Tumor	HWUSI-EAS227_104354553:3:8:1945:4957	X04946|TRAV12-2*03|Homo	26/27 nt	96.2963	26	M94081|TRAJ53*01|Homo	57/57 nt	100	57	CASHYLGYSGGSNYKLTF	TRA
TCGA-A8-A08H	Primary Tumor	HWUSI-EAS227_104354553:3:29:9851:16204	AE000659|TRAV8-3*01|Homo	43/43 nt	100	43	M94081|TRAJ49*01|Homo	50/50 nt	100	50	CAVGAPVGNQFYF	TRA
TCGA-A8-A08H	Primary Tumor	HWUSI-EAS227_104354553:3:70:13269:2308	AE000660|TRAV20*01|Homo	34/35 nt	97.1429	34	M35620|TRAJ40*01|Homo	57/57 nt	100	57	CCPASSGTYKYIF	TRA
TCGA-A8-A08H	Primary Tumor	HWUSI-EAS227_104354553:2:113:13033:11623	AE000660|TRAV27*01|Homo	39/39 nt	100	39	M35620|TRAJ40*01|Homo	55/55 nt	100	55	CAGRSGTYKYIF	TRA
TCGA-A8-A08H	Primary Tumor	HWUSI-EAS227_104354553:2:115:9652:10351	AE000660|TRAV27*01|Homo	39/39 nt	100	39	M35620|TRAJ40*01|Homo	55/55 nt	100	55	CAGRSGTYKYIF	TRA
TCGA-A8-A08H	Primary Tumor	HWUSI-EAS227_104354553:3:77:2708:10166	AE000660|TRAV26-2*01|Homo	38/38 nt	100	38	M94081|TRAJ27*01|Homo	52/52 nt	100	52	CCCVLLHPETRLYNTNAGKSTF	TRA
TCGA-BH-A0BW	Primary Tumor	HWUSI-EAS227_109445579:1:109:12336:5084	M17657|TRAV12-1*02|Homo	50/50 nt	100	50	M94081|TRAJ38*01|Homo	36/36 nt	100	36	CVALQTGAGNNRKLIW	TRA
TCGA-BH-A0BW	Primary Tumor	HWUSI-EAS227_109445579:2:43:15693:14595	X04954|TRAV13-1*02|Homo	52/52 nt	100	52	M94081|TRAJ10*01|Homo	47/50 nt	94	47	CAATGGGNKLTF	TRA
TCGA-BH-A0BW	Primary Tumor	HWUSI-EAS227_109445579:2:82:13453:21118	AE000659|TRAV9-2*01|Homo	61/61 nt	100	61	M94081|TRAJ42*01|Homo	29/29 nt	100	29	CSESSSGNYGGSQGNLIF	TRA
TCGA-BH-A0BW	Primary Tumor	HWUSI-EAS227_109445579:2:26:4657:12665	AE000659|TRAV9-2*01|Homo	55/55 nt	100	55	M35620|TRAJ40*01|Homo	42/42 nt	100	42	CALITSGTYKYIF	TRA
TCGA-BH-A0BW	Primary Tumor	HWUSI-EAS227_109445579:1:60:6753:1731	AE000659|TRAV9-2*01|Homo	55/55 nt	100	55	M94081|TRAJ38*01|Homo	35/35 nt	100	35	CALSDLPHAGNNRKLIW	TRA
TCGA-BH-A0BW	Primary Tumor	HWUSI-EAS227_109445579:1:117:15102:3637	AE000659|TRAV9-2*01|Homo	55/55 nt	100	55	M94081|TRAJ38*01|Homo	35/35 nt	100	35	CALSDLPHAGNNRKLIW	TRA
TCGA-BH-A0BW	Primary Tumor	HWUSI-EAS227_109445579:2:49:16334:18110	AE000660|TRAV17*01|Homo	53/53 nt	100	53	M94081|TRAJ53*01|Homo	45/48 nt	93.75	45	CATNSGGSNYKLKF	TRA
TCGA-BH-A0BW	Primary Tumor	HWUSI-EAS227_109445579:1:29:10530:2804	AE000660|TRAV19*01|Homo	60/60 nt	100	60	M94081|TRAJ26*01|Homo	38/38 nt	100	38	CALSDHNYGQNFVF	TRA
TCGA-BH-A0BW	Primary Tumor	HWUSI-EAS227_109445579:1:55:7289:1814	AE000660|TRAV24*01|Homo	67/67 nt	100	67	M94081|TRAJ26*01|Homo	35/35 nt	100	35	CAFNYGQNFVF	TRA
TCGA-BH-A0BW	Primary Tumor	HWUSI-EAS227_109445579:2:102:18833:18627	AE000660|TRAV36/DV7*01|Homo	52/52 nt	100	52	M94081|TRAJ26*01|Homo	42/43 nt	97.6744	42	CARDYGQNFVF	TRA
TCGA-BH-A0BW	Primary Tumor	HWUSI-EAS227_109445579:1:53:17978:18956	AE000660|TRAV26-2*01|Homo	23/23 nt	100	23	M94081|TRAJ48*01|Homo	58/58 nt	100	58	CVLLHPEINFGNEKLTF	TRA
TCGA-BH-A0BW	Primary Tumor	HWUSI-EAS227_109445579:2:49:12838:6256	S81645|TRAV29/DV5*02|Homo	33/33 nt	100	33	M94081|TRAJ42*01|Homo	58/59 nt	98.3051	58	CAAREEGSQGNLIF	TRA
TCGA-BH-A0BW	Primary Tumor	HWUSI-EAS227_109445579:2:34:6412:13329	AE000659|TRAV14/DV4*02|Homo	43/45 nt	95.5556	43	M94081|TRAJ27*01|Homo	49/49 nt	100	49	CAMREWGETNAGKSTF	TRA
TCGA-BH-A0BW	Primary Tumor	HWUSI-EAS227_109445579:1:29:10530:2804	AE000660|TRAV19*01|Homo	25/25 nt	100	25	M94081|TRAJ26*01|Homo	57/57 nt	100	57	CALSDHNYGQNFVF	TRA
TCGA-BH-A0BW	Primary Tumor	HWUSI-EAS227_109445579:2:113:16697:1977	AE000659|TRAV14/DV4*02|Homo	48/49 nt	97.9592	48	AC023226|TRAJ13*02|Homo	48/48 nt	100	48	CAMRSSGGYQKVTF	TRA
TCGA-BH-A18T	Primary Tumor	HWI-ST664_110089929:2:68:15842:162955	AE000659|TRAV5*01|Homo	66/66 nt	100	66	M94081|TRAJ42*01|Homo	25/25 nt	100	25	CAEIFPLNYGGSQGNLIF	TRA
TCGA-BH-A18T	Primary Tumor	HWI-ST664_110089929:2:44:2847:185383	AE000660|TRAV19*01|Homo	67/67 nt	100	67	M35620|TRAJ40*01|Homo	27/27 nt	100	27	CALCLTSGTYKYIF	TRA
TCGA-BH-A18T	Primary Tumor	HWI-ST664_110089929:2:65:8140:40549	AE000660|TRAV22*01|Homo	69/69 nt	100	69	M35620|TRAJ40*01|Homo	26/26 nt	100	26	CAAFSGTYKYIF	TRA
TCGA-BH-A18T	Primary Tumor	HWI-ST664_110089929:2:64:7959:133316	AE000661|TRAV38-2/DV8*01|Homo	30/30 nt	100	30	M94081|TRAJ57*01|Homo	59/59 nt	100	59	CAYRRYQGGSEKLVF	TRA
TCGA-BH-A18T	Primary Tumor	HWI-ST664_110089929:2:46:5767:18182	AE000658|TRAV2*01|Homo	20/21 nt	95.2381	20	M94081|TRAJ45*01|Homo	58/58 nt	100	58	CAVGGGADGLTF	TRA
TCGA-BH-A18T	Primary Tumor	HWI-ST664_110089929:2:47:15914:111863	AE000660|TRAV20*01|Homo	40/40 nt	100	40	M94081|TRAJ29*01|Homo	55/55 nt	100	55	CAFSGNTPLVF	TRA
TCGA-BH-A18T	Primary Tumor	HWI-ST664_110089929:2:5:18026:12190	AE000659|TRAV5*01|Homo	26/26 nt	100	26	X02886|TRAJ22*01|Homo	56/57 nt	98.2456	56	CAESVPGSARQLTF	TRA
TCGA-BH-A18T	Primary Tumor	HWI-ST664_110089929:2:67:10203:91003	AE000659|TRAV9-2*01|Homo	23/23 nt	100	23	X05775|TRAJ15*01|Homo	58/58 nt	100	58	CALRGNQAGTALIF	TRA
TCGA-AC-A8OS	Primary Tumor	HWI-ST720:146417965:C5A0HACXX:3:1116:2717:85856	AE000661|TRAV39*01|Homo	65/67 nt	97.0149	65	M94081|TRAJ29*01|Homo	33/33 nt	100	33	CAVGTSGNTPLVF	TRA
TCGA-OL-A5RX	Primary Tumor	HWI-ST467:139314245:C24PVACXX:6:2109:7656:53423	AE000660|TRAV35*01|Homo	75/75 nt	100	75	M35620|TRAJ40*01|Homo	19/19 nt	100	19	CAGRYTSGTYKYIF	TRA
TCGA-C8-A1HF	Primary Tumor	HWI-ST467_110093165:7:27:18354:104292	M17657|TRAV12-1*02|Homo	49/49 nt	100	49	M94081|TRAJ24*02|Homo	44/47 nt	93.617	44	CVVSMTTDSWGKFQF	TRA
TCGA-C8-A1HF	Primary Tumor	HWI-ST467_110093165:7:23:3999:45891	X63455|TRAV8-4*05|Homo	66/66 nt	100	66	M94081|TRAJ42*01|Homo	32/32 nt	100	32	CAVSDRGSQGNLIF	TRA
TCGA-C8-A1HF	Primary Tumor	HWI-ST467_110093165:7:65:1709:109238	AE000660|TRAV17*01|Homo	61/61 nt	100	61	X02886|TRAJ22*01|Homo	30/30 nt	100	30	CAAPYSGSARQLTF	TRA
TCGA-C8-A1HF	Primary Tumor	HWI-ST467_110093165:7:63:7200:198343	AE000660|TRAV19*01|Homo	51/51 nt	100	51	M35620|TRAJ40*01|Homo	43/43 nt	100	43	CALSEPETTSGTYKYIF	TRA
TCGA-C8-A1HF	Primary Tumor	HWI-ST467_110093165:7:46:14815:171482	AE000660|TRAV19*01|Homo	48/48 nt	100	48	M94081|TRAJ43*01|Homo	46/46 nt	100	46	CALSEGRDNDMRF	TRA
TCGA-C8-A1HF	Primary Tumor	HWI-ST467_110093165:7:45:12731:130135	AE000660|TRAV22*01|Homo	70/70 nt	100	70	M94081|TRAJ43*01|Homo	30/30 nt	100	30	CAVNNDMRF	TRA
TCGA-C8-A1HF	Primary Tumor	HWI-ST467_110093165:7:3:19976:78280	AE000660|TRAV29/DV5*01|Homo	79/79 nt	100	79	M94081|TRAJ53*01|Homo	19/19 nt	100	19	CAAKSGGSNYKLTF	TRA
TCGA-C8-A1HF	Primary Tumor	HWI-ST467_110093165:7:63:20646:77453	AE000660|TRAV29/DV5*01|Homo	59/59 nt	100	59	M94081|TRAJ4*01|Homo	32/32 nt	100	32	CAASSSFSGGYNKLIF	TRA
TCGA-C8-A1HF	Primary Tumor	HWI-ST467_110093165:7:21:18728:197200	AE000660|TRAV29/DV5*01|Homo	59/59 nt	100	59	M94081|TRAJ4*01|Homo	31/33 nt	93.9394	31	CAASSSFSGGYNKLMF	TRA
TCGA-C8-A1HF	Primary Tumor	HWI-ST467_110093165:7:3:7188:145454	AE000661|TRAV38-2/DV8*01|Homo	51/51 nt	100	51	M94081|TRAJ41*01|Homo	48/48 nt	100	48	CAYRSANSNSGYALNF	TRA
TCGA-C8-A1HF	Primary Tumor	HWI-ST467_110093165:7:25:15619:195081	AE000661|TRAV39*01|Homo	67/67 nt	100	67	AF033825|TRAJ47*02|Homo	29/29 nt	100	29	CMTSLPPTSVPWTGGNKLVF	TRA
TCGA-C8-A1HF	Primary Tumor	HWI-ST467_110093165:7:3:17205:89996	AE000661|TRAV39*01|Homo	66/66 nt	100	66	AF033825|TRAJ47*02|Homo	29/29 nt	100	29	CMTSLPPTSVPWTGGNKLVF	TRA
TCGA-C8-A1HF	Primary Tumor	HWI-ST467_110093165:7:67:7195:66070	AE000660|TRAV19*01|Homo	20/20 nt	100	20	M94081|TRAJ45*01|Homo	65/65 nt	100	65	CALSDPYSGGGADGLTF	TRA
TCGA-C8-A1HF	Primary Tumor	HWI-ST467_110093165:7:23:3999:45891	M12423|TRAV8-4*02|Homo	34/34 nt	100	34	M94081|TRAJ42*01|Homo	57/57 nt	100	57	CAVSDRGSQGNLIF	TRA
TCGA-C8-A1HF	Primary Tumor	HWI-ST467_110093165:7:22:15535:156173	AE000660|TRAV19*01|Homo	19/19 nt	100	19	M35620|TRAJ40*01|Homo	61/61 nt	100	61	CALSEPETTSGTYKYIF	TRA
TCGA-C8-A1HF	Primary Tumor	HWI-ST467_110093165:7:46:4994:43466	AE000660|TRAV19*01|Homo	19/19 nt	100	19	M35620|TRAJ40*01|Homo	61/61 nt	100	61	CALSEPETTSGTYKYIF	TRA
TCGA-C8-A1HF	Primary Tumor	HWI-ST467_110093165:7:67:12860:55713	AE000660|TRAV19*01|Homo	20/21 nt	95.2381	20	M35620|TRAJ40*01|Homo	61/61 nt	100	61	CALSGPETTSGTYKYIF	TRA
TCGA-C8-A1HF	Primary Tumor	HWI-ST467_110093165:7:68:17601:45919	AE000660|TRAV19*01|Homo	19/19 nt	100	19	M35620|TRAJ40*01|Homo	61/61 nt	100	61	CALSEPETTSGTYKYIF	TRA
TCGA-C8-A1HF	Primary Tumor	HWI-ST467_110093165:7:7:19582:171914	AE000660|TRAV19*01|Homo	42/42 nt	100	42	M35620|TRAJ40*01|Homo	52/52 nt	100	52	CALSEPETTSGTYKYIF	TRA
TCGA-C8-A1HF	Primary Tumor	HWI-ST467_110093165:7:48:16108:132309	AE000659|TRAV5*01|Homo	32/32 nt	100	32	M94081|TRAJ30*01|Homo	53/53 nt	100	53	CAEIPSRDDKIIF	TRA
TCGA-AR-A24S	Primary Tumor	HWI-ST444_116124287:2:1205:1939:154410	AE000661|TRAV38-2/DV8*01|Homo	57/57 nt	100	57	M94081|TRAJ42*01|Homo	37/37 nt	100	37	CAYDPGGSQGNLIF	TRA
TCGA-AR-A24S	Primary Tumor	HWI-ST444_116124287:2:1206:1853:107598	AE000661|TRAV38-2/DV8*01|Homo	57/57 nt	100	57	M94081|TRAJ42*01|Homo	37/37 nt	100	37	CAYDPGGSQGNLIF	TRA
TCGA-B6-A0RT	Primary Tumor	HWUSI-EAS577_107046841:7:22:16906:1743	AE000658|TRAV1-2*01|Homo	82/83 nt	98.7952	82	M94081|TRAJ30*01|Homo	20/20 nt	100	20	CAVRRDDKIIF	TRA
TCGA-B6-A0RT	Primary Tumor	HWUSI-EAS577_107046841:8:40:19544:4477	AE000658|TRAV1-2*01|Homo	45/45 nt	100	45	X02884|TRAJ3*01|Homo	45/45 nt	100	45	CAVRALPPGYSSASKIIF	TRA
TCGA-B6-A0RT	Primary Tumor	HWUSI-EAS577_107046841:8:117:14477:5713	AE000658|TRAV3*01|Homo	49/49 nt	100	49	AF532854|TRAJ32*02|Homo	42/42 nt	100	42	CAGGFYGGATNKLIF	TRA
TCGA-B6-A0RT	Primary Tumor	HWUSI-EAS577_107046841:8:21:9497:2527	X04946|TRAV12-2*03|Homo	68/68 nt	100	68	M94081|TRAJ20*01|Homo	24/24 nt	100	24	CAVIREDYKLSF	TRA
TCGA-B6-A0RT	Primary Tumor	HWUSI-EAS577_107046841:8:73:13362:10772	X04946|TRAV12-2*03|Homo	67/68 nt	98.5294	67	M94081|TRAJ20*01|Homo	24/24 nt	100	24	CAVIREDYKLSF	TRA
TCGA-B6-A0RT	Primary Tumor	HWUSI-EAS577_107046841:7:72:6057:16413	AE000659|TRAV8-4*01|Homo	71/71 nt	100	71	M35620|TRAJ40*01|Homo	22/22 nt	100	22	CAVQFSGTYKYIF	TRA
TCGA-B6-A0RT	Primary Tumor	HWUSI-EAS577_107046841:8:32:13160:13208	AE000659|TRAV8-4*01|Homo	71/71 nt	100	71	M35620|TRAJ40*01|Homo	22/22 nt	100	22	CAVQFSGTYKYIF	TRA
TCGA-B6-A0RT	Primary Tumor	HWUSI-EAS577_107046841:8:57:17973:20811	M21626|TRAV14/DV4*01|Homo	72/72 nt	100	72	X05773|TRAJ17*01|Homo	29/29 nt	100	29	CNERGIKAAGNKLTF	TRA
TCGA-B6-A0RT	Primary Tumor	HWUSI-EAS577_107046841:7:74:12067:10661	AE000659|TRAV9-2*01|Homo	50/50 nt	100	50	M94081|TRAJ56*01|Homo	50/51 nt	98.0392	50	CALSDTGANSKLTF	TRA
TCGA-B6-A0RT	Primary Tumor	HWUSI-EAS577_107046841:8:76:14516:3185	AE000659|TRAV9-2*01|Homo	50/50 nt	100	50	M94081|TRAJ56*01|Homo	50/51 nt	98.0392	50	CALSDTGANSKLTF	TRA
TCGA-B6-A0RT	Primary Tumor	HWUSI-EAS577_107046841:8:48:6554:17514	AE000660|TRAV21*01|Homo	70/70 nt	100	70	M94081|TRAJ42*01|Homo	26/26 nt	100	26	CGYGGSQGNLIF	TRA
TCGA-B6-A0RT	Primary Tumor	HWUSI-EAS577_107046841:8:118:16278:3534	AE000660|TRAV25*01|Homo	47/47 nt	100	47	X02886|TRAJ22*01|Homo	29/29 nt	100	29	CAGGGSARGVRF	TRA
TCGA-B6-A0RT	Primary Tumor	HWUSI-EAS577_107046841:8:26:12464:6452	AE000660|TRAV26-1*01|Homo	71/71 nt	100	71	M94081|TRAJ45*01|Homo	20/20 nt	100	20	CCVLLHRQTPPDSGGGADGLTF	TRA
TCGA-B6-A0RT	Primary Tumor	HWUSI-EAS577_107046841:8:76:1642:8784	AE000660|TRAV26-1*01|Homo	71/71 nt	100	71	M94081|TRAJ45*01|Homo	20/20 nt	100	20	CCVLLHRQTPPDSGGGADGLTF	TRA
TCGA-B6-A0RT	Primary Tumor	HWUSI-EAS577_107046841:7:52:2391:15479	AE000660|TRAV29/DV5*01|Homo	70/70 nt	100	70	M94081|TRAJ57*01|Homo	25/26 nt	96.1538	25	CAASVRGGSEKLGF	TRA
TCGA-B6-A0RT	Primary Tumor	HWUSI-EAS577_107046841:7:105:2724:7631	AE000660|TRAV29/DV5*01|Homo	49/49 nt	100	49	M35620|TRAJ40*01|Homo	47/47 nt	100	47	CAASANSGTYKYIF	TRA
TCGA-B6-A0RT	Primary Tumor	HWUSI-EAS577_107046841:7:112:14694:3433	AE000660|TRAV29/DV5*01|Homo	49/49 nt	100	49	M35620|TRAJ40*01|Homo	47/47 nt	100	47	CAASANSGTYKYIF	TRA
TCGA-B6-A0RT	Primary Tumor	HWUSI-EAS577_107046841:7:25:5768:11997	AE000660|TRAV29/DV5*01|Homo	49/49 nt	100	49	M35620|TRAJ40*01|Homo	47/47 nt	100	47	CAASANSGTYKYIF	TRA
TCGA-B6-A0RT	Primary Tumor	HWUSI-EAS577_107046841:8:50:10928:1581	AE000660|TRAV34*01|Homo	64/64 nt	100	64	M94081|TRAJ38*01|Homo	31/31 nt	100	31	CGAKDAGNNRKLIW	TRA
TCGA-B6-A0RT	Primary Tumor	HWUSI-EAS577_107046841:8:75:8821:11075	AE000661|TRAV38-2/DV8*01|Homo	71/71 nt	100	71	M94081|TRAJ43*01|Homo	22/22 nt	100	22	CAYRSAGFDMRF	TRA
TCGA-B6-A0RT	Primary Tumor	HWUSI-EAS577_107046841:8:75:8821:11075	AE000661|TRAV38-2/DV8*01|Homo	69/69 nt	100	69	M94081|TRAJ43*01|Homo	24/24 nt	100	24	CAYRSAGFDMRF	TRA
TCGA-B6-A0RT	Primary Tumor	HWUSI-EAS577_107046841:8:9:15754:1995	AE000661|TRAV38-2/DV8*01|Homo	66/67 nt	98.5075	66	M94081|TRAJ45*01|Homo	34/34 nt	100	34	CAYREYSGGGADGLTF	TRA
TCGA-B6-A0RT	Primary Tumor	HWUSI-EAS577_107046841:8:117:13598:20437	AE000661|TRAV41*01|Homo	75/75 nt	100	75	X02886|TRAJ22*01|Homo	24/24 nt	100	24	CATSGSARQLTF	TRA
TCGA-B6-A0RT	Primary Tumor	HWUSI-EAS577_107046841:8:57:10429:12276	M17656|TRAV12-3*02|Homo	42/42 nt	100	42	M94081|TRAJ54*01|Homo	48/48 nt	100	48	CNDLSMIQGAQKLVF	TRA
TCGA-B6-A0RT	Primary Tumor	HWUSI-EAS577_107046841:7:88:17670:18884	AE000660|TRAV17*01|Homo	29/29 nt	100	29	M94081|TRAJ52*01|Homo	68/68 nt	100	68	CATDATNAGGTSYGKLTF	TRA
TCGA-B6-A0RT	Primary Tumor	HWUSI-EAS577_107046841:7:30:3089:15442	AE000660|TRAV17*01|Homo	23/23 nt	100	23	M94081|TRAJ45*01|Homo	61/61 nt	100	61	CATSGGGADGLTF	TRA
TCGA-B6-A0RT	Primary Tumor	HWUSI-EAS577_107046841:7:49:7905:10658	AE000660|TRAV29/DV5*01|Homo	36/36 nt	100	36	M94081|TRAJ45*01|Homo	60/60 nt	100	60	CAASEAGGGADGLTF	TRA
TCGA-B6-A0RT	Primary Tumor	HWUSI-EAS577_107046841:7:92:15027:1892	AE000658|TRAV2*01|Homo	29/29 nt	100	29	M94081|TRAJ33*01|Homo	56/57 nt	98.2456	56	CAVESNYQLIW	TRA
TCGA-B6-A0RT	Primary Tumor	HWUSI-EAS577_107046841:7:64:11927:9878	AE000660|TRAV29/DV5*01|Homo	20/20 nt	100	20	M94081|TRAJ33*01|Homo	51/51 nt	100	51	CSKRGNYQLIW	TRA
TCGA-B6-A0RT	Primary Tumor	HWUSI-EAS577_107046841:8:99:6668:13237	AE000658|TRAV1-2*01|Homo	42/42 nt	100	42	AF532854|TRAJ32*02|Homo	51/51 nt	100	51	CAVPLGGATNKLIF	TRA
TCGA-B6-A0RT	Primary Tumor	HWUSI-EAS577_107046841:7:37:10848:14223	AE000658|TRAV1-2*01|Homo	37/37 nt	100	37	AF532854|TRAJ32*02|Homo	56/56 nt	100	56	CAVPLGGATNKLIF	TRA
TCGA-B6-A0RT	Primary Tumor	HWUSI-EAS577_107046841:7:34:13427:9912	AE000658|TRAV1-2*01|Homo	37/37 nt	100	37	AF532854|TRAJ32*02|Homo	56/56 nt	100	56	CAVPLGGATNKLIF	TRA
TCGA-B6-A0RT	Primary Tumor	HWUSI-EAS577_107046841:8:91:13311:11788	AE000658|TRAV1-2*01|Homo	37/37 nt	100	37	AF532854|TRAJ32*02|Homo	56/56 nt	100	56	CAVPLGGATNKLIF	TRA
TCGA-B6-A0RT	Primary Tumor	HWUSI-EAS577_107046841:7:103:13567:19869	AE000658|TRAV1-2*01|Homo	21/21 nt	100	21	M94081|TRAJ26*01|Homo	53/53 nt	100	53	CAVSPYGQNFVF	TRA
TCGA-B6-A0RT	Primary Tumor	HWUSI-EAS577_107046841:8:8:12904:20404	AE000661|TRAV41*01|Homo	20/20 nt	100	20	X02886|TRAJ22*01|Homo	60/60 nt	100	60	CATSGSARQLTF	TRA
TCGA-B6-A0RT	Primary Tumor	HWUSI-EAS577_107046841:7:64:11338:2871	AE000660|TRAV25*01|Homo	47/47 nt	100	47	X02886|TRAJ22*01|Homo	51/51 nt	100	51	CAGGGSARQLTF	TRA
TCGA-B6-A0RT	Primary Tumor	HWUSI-EAS577_107046841:8:21:9497:2527	AE000659|TRAV12-2*01|Homo	38/38 nt	100	38	M94081|TRAJ20*01|Homo	49/49 nt	100	49	CAVIREDYKLSF	TRA
TCGA-B6-A0RT	Primary Tumor	HWUSI-EAS577_107046841:8:73:13362:10772	X04946|TRAV12-2*03|Homo	37/39 nt	94.8718	37	M94081|TRAJ20*01|Homo	49/49 nt	100	49	CAVIREDYKLSF	TRA
TCGA-B6-A0RT	Primary Tumor	HWUSI-EAS577_107046841:7:87:16845:16381	AE000660|TRAV19*01|Homo	40/40 nt	100	40	X05773|TRAJ17*01|Homo	58/58 nt	100	58	CALRKAAGNKLTF	TRA
TCGA-B6-A0RT	Primary Tumor	HWUSI-EAS577_107046841:7:23:10995:20386	AE000659|TRAV6*01|Homo	42/42 nt	100	42	M16747|TRAJ6*01|Homo	52/52 nt	100	52	CALVGPGGSYIPTF	TRA
TCGA-B6-A0RT	Primary Tumor	HWUSI-EAS577_107046841:7:65:16612:14000	AE000659|TRAV6*01|Homo	42/42 nt	100	42	M16747|TRAJ6*01|Homo	52/52 nt	100	52	CALVGPGGSYIPTF	TRA
TCGA-B6-A0RT	Primary Tumor	HWUSI-EAS577_107046841:7:19:9038:19241	AE000658|TRAV4*01|Homo	22/22 nt	100	22	X02884|TRAJ3*01|Homo	56/56 nt	100	56	CLVGESSSASKIIF	TRA
TCGA-A1-A0SI	Primary Tumor	HWI-ST514_115489139:4:2204:12114:9051	AE000660|TRAV30*01|Homo	60/60 nt	100	60	M94081|TRAJ42*01|Homo	31/31 nt	100	31	CGTEIRAYGGSQGNLIF	TRA
TCGA-A1-A0SI	Primary Tumor	HWI-ST514_115489139:5:1201:8266:86712	AE000660|TRAV30*01|Homo	60/60 nt	100	60	M94081|TRAJ42*01|Homo	31/31 nt	100	31	CGTEIRAYGGSQGNLIF	TRA
TCGA-A1-A0SI	Primary Tumor	HWI-ST720_116501225:8:1307:17365:118184	AE000660|TRAV30*01|Homo	60/60 nt	100	60	M94081|TRAJ42*01|Homo	31/31 nt	100	31	CGTEIRAYGGSQGNLIF	TRA
TCGA-A1-A0SI	Primary Tumor	HWI-ST514_115489139:4:1207:8637:48916	AE000661|TRAV38-2/DV8*01|Homo	53/54 nt	98.1481	53	M94081|TRAJ39*01|Homo	43/43 nt	100	43	CAYGEAGNMLTF	TRA
TCGA-S3-AA10	Primary Tumor	HWI-ST720:146417965:C5A0HACXX:1:1101:17346:25646	AE000659|TRAV12-1*01|Homo	54/54 nt	100	54	AF033825|TRAJ47*02|Homo	41/41 nt	100	41	CGELNGNKLVF	TRA
TCGA-S3-AA10	Primary Tumor	HWI-ST720:146417965:C5A0HACXX:1:1108:14529:49038	AE000659|TRAV12-1*01|Homo	54/54 nt	100	54	AF033825|TRAJ47*02|Homo	41/41 nt	100	41	CGELNGNKLVF	TRA
TCGA-S3-AA10	Primary Tumor	HWI-ST720:146417965:C5A0HACXX:1:2307:2889:54338	AE000660|TRAV19*01|Homo	67/68 nt	98.5294	67	M94081|TRAJ24*02|Homo	22/22 nt	100	22	CSDFGASWGKLQF	TRA
TCGA-S3-AA10	Primary Tumor	HWI-ST720:146417965:C5A0HACXX:2:1312:14407:63621	X61070|TRAV36/DV7*02|Homo	69/70 nt	98.5714	69	M94081|TRAJ29*01|Homo	27/27 nt	100	27	CALSGNTPLVF	TRA
TCGA-S3-AA10	Primary Tumor	HWI-ST720:146417965:C5A0HACXX:1:2111:11050:28603	AE000660|TRAV36/DV7*01|Homo	20/21 nt	95.2381	20	M94081|TRAJ43*01|Homo	50/50 nt	100	50	CAVGGNNDMRF	TRA
TCGA-JL-A3YW	Primary Tumor	HWI-D00170:137498001:H0NR2ADXX:2:2107:4912:86100	AE000660|TRAV34*01|Homo	33/33 nt	100	33	M94081|TRAJ38*01|Homo	60/60 nt	100	60	CRHLPLWSRPYAGNNRKLIW	TRA
TCGA-A8-A09K	Primary Tumor	HWI-EAS110_105969435:3:30:9455:9970	AE000658|TRAV3*01|Homo	71/73 nt	97.2603	71	M94081|TRAJ8*01|Homo	30/30 nt	100	30	CERLRFVLLCCEGTGFQKLVF	TRA
TCGA-A8-A09K	Primary Tumor	HWUSI-EAS576_104437272:3:5:10575:2363	AE000658|TRAV4*01|Homo	65/67 nt	97.0149	65	M94081|TRAJ39*01|Homo	19/19 nt	100	19	CCVLLPRGRGALGAGNMLTF	TRA
TCGA-A8-A09K	Primary Tumor	HWUSI-EAS740_104447908:7:3:15107:10825	AE000659|TRAV5*01|Homo	70/70 nt	100	70	M94081|TRAJ42*01|Homo	22/22 nt	100	22	CRGGGGSQGNLIF	TRA
TCGA-A8-A09K	Primary Tumor	HWUSI-EAS576_104437272:3:74:12284:3677	X04946|TRAV12-2*03|Homo	27/29 nt	93.1034	27	M94081|TRAJ43*01|Homo	49/49 nt	100	49	CGVMNNDMRF	TRA
TCGA-A8-A09K	Primary Tumor	HWUSI-EAS576_104437272:3:29:6605:10181	S81645|TRAV29/DV5*02|Homo	36/36 nt	100	36	M94081|TRAJ38*01|Homo	58/58 nt	100	58	CTSVQQKRAGNNRKLIW	TRA
TCGA-A8-A09K	Primary Tumor	HWI-EAS110_105969435:3:34:12925:12613	AE000659|TRAV12-1*01|Homo	36/36 nt	100	36	M35622|TRAJ34*01|Homo	54/54 nt	100	54	CVVTGDNTDKLIF	TRA
TCGA-A8-A09K	Primary Tumor	HWUSI-EAS740_104447908:8:89:13009:18846	AE000659|TRAV10*01|Homo	22/22 nt	100	22	M35622|TRAJ34*01|Homo	52/52 nt	100	52	CVVSAGNTDKLIF	TRA
TCGA-A8-A09K	Primary Tumor	HWUSI-EAS576_104437272:3:1:9015:10380	AE000659|TRAV8-1*01|Homo	19/19 nt	100	19	M94081|TRAJ30*01|Homo	55/55 nt	100	55	CAVKGNRDDKIIF	TRA
TCGA-A8-A09K	Primary Tumor	HWUSI-EAS740_104447908:7:107:13957:11401	AE000660|TRAV27*01|Homo	51/52 nt	98.0769	51	M94081|TRAJ20*01|Homo	44/44 nt	100	44	CAGEGDYKLSF	TRA
TCGA-A8-A09D	Primary Tumor	HWUSI-EAS712_104458272:1:83:11994:5964	X04946|TRAV12-2*03|Homo	57/57 nt	100	57	M35620|TRAJ40*01|Homo	37/37 nt	100	37	CSSETPSPVIQPPTSVPW	TRA
TCGA-A8-A09D	Primary Tumor	HWUSI-EAS712_104458272:2:81:5958:10872	X04954|TRAV13-1*02|Homo	31/31 nt	100	31	M35620|TRAJ40*01|Homo	52/52 nt	100	52	CAASKGTYKYIF	TRA
TCGA-A8-A09D	Primary Tumor	HWUSI-EAS712_104458272:1:51:16443:20254	AE000659|TRAV13-1*01|Homo	41/42 nt	97.619	41	M35620|TRAJ40*01|Homo	52/52 nt	100	52	CAASKGTYKYIF	TRA
TCGA-A8-A09D	Primary Tumor	HWUSI-EAS712_104458272:2:64:11885:7660	AE000659|TRAV13-1*01|Homo	42/42 nt	100	42	M35620|TRAJ40*01|Homo	52/52 nt	100	52	CAASKGTYKYIF	TRA
TCGA-GM-A3NY	Primary Tumor	HWI-ST446:137378071:C1T0PACXX:5:2106:12122:98411	AE000661|TRAV38-1*01|Homo	46/46 nt	100	46	M35620|TRAJ40*01|Homo	51/51 nt	100	51	CDVFLCFHAAGTYKYIF	TRA
TCGA-A8-A09X	Primary Tumor	HWI-EAS404_104420206:3:64:15175:15513	AE000658|TRAV3*01|Homo	62/63 nt	98.4127	62	X02886|TRAJ22*01|Homo	23/23 nt	100	23	CAVRDISPWGSGSARQLTF	TRA
TCGA-A8-A09X	Primary Tumor	HWI-EAS404_104420206:1:38:7945:13986	AE000658|TRAV3*01|Homo	63/63 nt	100	63	X02886|TRAJ22*01|Homo	23/23 nt	100	23	CAVRDISPLGSGSARQLTF	TRA
TCGA-A8-A09X	Primary Tumor	HWI-EAS404_104420206:1:69:3263:7537	AE000658|TRAV3*01|Homo	58/59 nt	98.3051	58	X02886|TRAJ22*01|Homo	23/23 nt	100	23	CAVRDISPWGSGSARQLTF	TRA
TCGA-A8-A09X	Primary Tumor	HWI-EAS404_104420206:2:69:17485:16077	AE000659|TRAV6*01|Homo	59/59 nt	100	59	M94081|TRAJ50*01|Homo	32/32 nt	100	32	CALAVLMKTSYDKVIF	TRA
TCGA-A8-A09X	Primary Tumor	HWI-EAS404_104420206:3:82:16016:17528	AE000659|TRAV8-1*01|Homo	69/69 nt	100	69	M94081|TRAJ37*01|Homo	21/21 nt	100	21	CAVCVTGNTGKLIF	TRA
TCGA-A8-A09X	Primary Tumor	HWI-EAS404_104420206:2:94:9318:17483	AE000659|TRAV8-2*01|Homo	80/80 nt	100	80	M94081|TRAJ49*01|Homo	20/20 nt	100	20	CVVSTGNQFYF	TRA
TCGA-A8-A09X	Primary Tumor	HWI-EAS404_104420206:2:89:3939:15064	AE000659|TRAV8-2*01|Homo	77/77 nt	100	77	M94081|TRAJ45*01|Homo	21/21 nt	100	21	CVVSEPGGGADGLTF	TRA
TCGA-A8-A09X	Primary Tumor	HWI-EAS404_104420206:2:54:7029:1755	AE000659|TRAV13-1*01|Homo	53/53 nt	100	53	M35620|TRAJ40*01|Homo	43/43 nt	100	43	CAASRGSGTYKYIF	TRA
TCGA-A8-A09X	Primary Tumor	HWI-EAS404_104420206:1:102:8362:6687	X02850|TRAV8-6*01|Homo	74/74 nt	100	74	M14905|TRAJ31*01|Homo	20/20 nt	100	20	CAVSVGYNARLMF	TRA
TCGA-A8-A09X	Primary Tumor	HWI-EAS404_104420206:2:24:9254:18756	AE000660|TRAV24*01|Homo	50/50 nt	100	50	M35622|TRAJ34*01|Homo	46/46 nt	100	46	CARHTDKLIF	TRA
TCGA-A8-A09X	Primary Tumor	HWI-EAS404_104420206:1:44:15289:18387	AE000661|TRAV38-2/DV8*01|Homo	59/59 nt	100	59	M94081|TRAJ30*01|Homo	32/32 nt	100	32	CAIKGNRDDKIIF	TRA
TCGA-A8-A09X	Primary Tumor	HWI-EAS404_104420206:1:4:2335:15588	M17656|TRAV12-3*02|Homo	36/36 nt	100	36	M94081|TRAJ54*01|Homo	57/57 nt	100	57	CAMSSVQGAQKLVF	TRA
TCGA-A8-A09X	Primary Tumor	HWI-EAS404_104420206:3:36:9436:1551	M21626|TRAV14/DV4*01|Homo	47/48 nt	97.9167	47	M94081|TRAJ54*01|Homo	49/49 nt	100	49	CNEREVQGAQKLVF	TRA
TCGA-A8-A09X	Primary Tumor	HWI-EAS404_104420206:1:65:10318:7637	AE000659|TRAV6*01|Homo	29/29 nt	100	29	M94081|TRAJ50*01|Homo	60/60 nt	100	60	CALAVLMKTSYDKVIF	TRA
TCGA-A8-A09X	Primary Tumor	HWI-EAS404_104420206:1:21:15690:19666	AE000660|TRAV19*01|Homo	21/21 nt	100	21	M94081|TRAJ47*01|Homo	51/51 nt	100	51	CALSEAHGNKLVF	TRA
TCGA-A8-A09X	Primary Tumor	HWI-EAS404_104420206:1:54:16812:8245	AE000660|TRAV27*01|Homo	38/39 nt	97.4359	38	M94081|TRAJ45*01|Homo	55/55 nt	100	55	CRSGAGGGADGLTF	TRA
TCGA-A8-A09X	Primary Tumor	HWI-EAS404_104420206:3:31:18488:14365	AE000658|TRAV2*01|Homo	40/40 nt	100	40	M94081|TRAJ42*01|Homo	56/56 nt	100	56	CAVEDRGGSQGNLIF	TRA
TCGA-A8-A09X	Primary Tumor	HWI-EAS404_104420206:3:49:19065:20899	AE000658|TRAV3*01|Homo	48/48 nt	100	48	M16747|TRAJ6*01|Homo	50/50 nt	100	50	CAVRDTSGGSYIPTF	TRA
TCGA-BH-A0BJ	Primary Tumor	HWUSI-EAS577_105764015:8:63:17312:17467#0	AE000658|TRAV3*01|Homo	72/72 nt	100	72	M94081|TRAJ26*01|Homo	26/26 nt	100	26	CAVRDRNYGQNFVF	TRA
TCGA-BH-A0BJ	Primary Tumor	HWUSI-EAS574_105716864:7:60:7510:10462#0	AE000659|TRAV5*01|Homo	72/72 nt	100	72	M94081|TRAJ8*01|Homo	21/21 nt	100	21	CAESIGRNTGFQKLVF	TRA
TCGA-BH-A0BJ	Primary Tumor	HWUSI-EAS574_105716864:7:101:12346:10842#0	AE000660|TRAV29/DV5*01|Homo	41/41 nt	100	41	M94081|TRAJ26*01|Homo	57/57 nt	100	57	CSVLLCSKRWDNYGQNFVF	TRA
TCGA-EW-A423	Primary Tumor	HWI-ST485:137341042:D1WPGACXX:7:2307:21277:77798	AE000658|TRAV1-1*01|Homo	40/40 nt	100	40	X05775|TRAJ15*01|Homo	54/54 nt	100	54	CAVRDTSNQAGTALIF	TRA
TCGA-EW-A423	Primary Tumor	HWI-ST485:137341042:D1WPGACXX:8:2201:6766:40485	AE000659|TRAV14/DV4*02|Homo	40/40 nt	100	40	M94081|TRAJ11*01|Homo	60/60 nt	100	60	CAMREVNSGYSTLTF	TRA
TCGA-OL-A6VQ	Primary Tumor	HWI-ST434:147224318:C5KB7ACXX:3:1110:7210:91362	M35617|TRAV8-3*02|Homo	79/79 nt	100	79	M94081|TRAJ11*01|Homo	20/20 nt	100	20	CAVGNSGYSTLTF	TRA
TCGA-OL-A6VQ	Primary Tumor	HWI-ST514:146274248:C4VEDACXX:2:1210:20195:30859	AE000659|TRAV9-2*01|Homo	65/65 nt	100	65	X05773|TRAJ17*01|Homo	31/31 nt	100	31	CALRGAAGNKLTF	TRA
TCGA-A8-A076	Primary Tumor	HWI-EAS90_104458291:2:5:19005:14521	AE000660|TRAV21*01|Homo	78/78 nt	100	78	M94081|TRAJ11*01|Homo	21/22 nt	95.4545	21	CCNSGYSTLTF	TRA
TCGA-A8-A076	Primary Tumor	HWI-EAS90_104458291:1:118:11708:11306	AE000660|TRAV21*01|Homo	22/22 nt	100	22	M94081|TRAJ38*01|Homo	61/61 nt	100	61	CAVNAGNNRKLIW	TRA
TCGA-D8-A1X9	Primary Tumor	HWI-ST467_114519188:7:2104:2592:81516	AE000658|TRAV1-2*01|Homo	72/73 nt	98.6301	72	M94081|TRAJ33*01|Homo	29/29 nt	100	29	CAVKDSNYQLIW	TRA
TCGA-D8-A1X9	Primary Tumor	HWI-ST467_114519188:8:2208:3233:11569	AE000658|TRAV1-2*01|Homo	72/73 nt	98.6301	72	M94081|TRAJ33*01|Homo	29/29 nt	100	29	CAVKDSNYQLIW	TRA
TCGA-D8-A1X9	Primary Tumor	HWI-ST467_114519188:8:1108:3999:139117	AE000660|TRAV26-2*01|Homo	31/31 nt	100	31	M94081|TRAJ45*01|Homo	58/58 nt	100	58	CILRDARLTSGGGADGLTF	TRA
TCGA-D8-A1X9	Primary Tumor	HWI-ST467_114519188:7:2105:1904:37207	AE000658|TRAV1-2*01|Homo	33/33 nt	100	33	M94081|TRAJ33*01|Homo	57/57 nt	100	57	CAVMDSNYQLIW	TRA
TCGA-D8-A1X9	Primary Tumor	HWI-ST467_114519188:8:2204:20024:127728	AE000658|TRAV1-2*01|Homo	33/33 nt	100	33	M94081|TRAJ33*01|Homo	57/57 nt	100	57	CAVMDSNYQLIW	TRA
TCGA-D8-A1X9	Primary Tumor	HWI-ST467_114519188:7:1202:8727:180548	AE000659|TRAV16*01|Homo	44/44 nt	100	44	M14905|TRAJ31*01|Homo	50/51 nt	98.0392	50	CALPGSNNARLMF	TRA
TCGA-A2-A0T6	Primary Tumor	HWUSI-EAS575_107048311:5:60:16847:7482	AE000658|TRAV3*01|Homo	73/73 nt	100	73	M94081|TRAJ45*01|Homo	20/20 nt	100	20	CCERASYSGGGADGLTF	TRA
TCGA-A2-A0T6	Primary Tumor	HWUSI-EAS575_107048311:6:97:7120:17746	M17656|TRAV12-3*02|Homo	56/56 nt	100	56	M94081|TRAJ49*01|Homo	39/39 nt	100	39	CAMTKGNQFYF	TRA
TCGA-A2-A0T6	Primary Tumor	HWUSI-EAS575_107048311:6:58:4118:1292	AE000660|TRAV29/DV5*01|Homo	49/49 nt	100	49	M94081|TRAJ52*01|Homo	49/49 nt	100	49	CAASGAGGTSYGKLTF	TRA
TCGA-A2-A0T6	Primary Tumor	HWUSI-EAS575_107048311:5:60:1768:5688	AE000661|TRAV38-2/DV8*01|Homo	55/55 nt	100	55	M94081|TRAJ57*01|Homo	41/41 nt	100	41	CAYRSAGGGSEKLVF	TRA
TCGA-A2-A0T6	Primary Tumor	HWUSI-EAS575_107048311:5:68:2407:9457	AE000660|TRAV29/DV5*01|Homo	48/48 nt	100	48	M94081|TRAJ53*01|Homo	49/49 nt	100	49	CYGGSNYKLTF	TRA
TCGA-A2-A0T6	Primary Tumor	HWUSI-EAS575_107048311:6:100:1413:13280	AE000660|TRAV29/DV5*01|Homo	49/49 nt	100	49	M94081|TRAJ52*01|Homo	49/49 nt	100	49	CAASGAGGTSYGKLTF	TRA
TCGA-A2-A0T6	Primary Tumor	HWUSI-EAS575_107048311:6:105:16609:10640	AE000661|TRAV39*01|Homo	37/37 nt	100	37	M94081|TRAJ45*01|Homo	51/51 nt	100	51	CAVFSVGGGADGLTF	TRA
TCGA-A2-A0T6	Primary Tumor	HWUSI-EAS575_107048311:6:15:17799:2876	AE000659|TRAV16*01|Homo	25/25 nt	100	25	M94081|TRAJ26*01|Homo	49/49 nt	100	49	CSKALWGQNFVF	TRA
TCGA-A2-A4S3	Primary Tumor	HWI-ST466:137456800:C20VRACXX:3:2307:2644:9272	M35617|TRAV8-3*02|Homo	66/66 nt	100	66	X05775|TRAJ15*01|Homo	20/20 nt	100	20	CAVGRPRFNQAGTALIF	TRA
TCGA-A2-A4S3	Primary Tumor	HWI-ST466:137456800:C20VRACXX:4:1103:20757:64399	AE000659|TRAV12-3*01|Homo	54/54 nt	100	54	M94081|TRAJ8*01|Homo	47/49 nt	95.9184	47	CAMITGFQKLVF	TRA
TCGA-A2-A4S3	Primary Tumor	HWI-ST466:137456800:C20VRACXX:4:1302:15774:17610	AE000660|TRAV21*01|Homo	44/44 nt	100	44	M94081|TRAJ37*01|Homo	42/42 nt	100	42	CAVVRGRDNTGKLIF	TRA
TCGA-A2-A4S3	Primary Tumor	HWI-ST466:137456800:C20VRACXX:3:2307:21086:51308	AE000661|TRAV38-2/DV8*01|Homo	44/45 nt	97.7778	44	M94081|TRAJ24*02|Homo	52/52 nt	100	52	CALGTDSWGKLQF	TRA
TCGA-BH-A18Q	Primary Tumor	HWI-ST718_110121888:4:2:3663:108404	M17658|TRAV13-2*02|Homo	64/64 nt	100	64	M94081|TRAJ43*01|Homo	28/28 nt	100	28	CADDYHNNNDMRF	TRA
TCGA-BH-A18Q	Primary Tumor	HWI-ST718_110121888:4:42:11194:56159	M27371|TRAV26-1*02|Homo	49/49 nt	100	49	M35622|TRAJ34*01|Homo	47/47 nt	100	47	CCVLRDKLIF	TRA
TCGA-BH-A18Q	Primary Tumor	HWI-ST718_110121888:4:42:14161:194076	AE000660|TRAV27*01|Homo	49/50 nt	98	49	M94081|TRAJ52*01|Homo	43/43 nt	100	43	CGTSYGKLTF	TRA
TCGA-BH-A18Q	Primary Tumor	HWI-ST718_110121888:4:1:3519:22133	AE000658|TRAV1-1*01|Homo	19/19 nt	100	19	M94081|TRAJ33*01|Homo	53/53 nt	100	53	CAVISNYQLIW	TRA
TCGA-BH-A18Q	Primary Tumor	HWI-ST718_110121888:4:22:15287:128055	X04954|TRAV13-1*02|Homo	35/36 nt	97.2222	35	M94081|TRAJ29*01|Homo	54/54 nt	100	54	CAAPRPNSGNTPLVF	TRA
TCGA-B6-A0IJ	Primary Tumor	HWUSI-EAS683_106021046:7:89:14598:13050	AE000659|TRAV9-2*01|Homo	74/74 nt	100	74	M94081|TRAJ57*01|Homo	20/20 nt	100	20	CALSDRSQGGSEKLVF	TRA
TCGA-B6-A0IJ	Primary Tumor	HWUSI-EAS683_106021046:8:82:13947:13281	AE000660|TRAV26-2*01|Homo	75/75 nt	100	75	M94081|TRAJ26*01|Homo	23/23 nt	100	23	CCCVLLHPGDNYGQNFVF	TRA
TCGA-B6-A0IJ	Primary Tumor	HWUSI-EAS683_106021046:7:82:11022:15639	AE000661|TRAV39*01|Homo	48/48 nt	100	48	M94081|TRAJ43*01|Homo	46/46 nt	100	46	CHLLLCRDLYNNNDMRF	TRA
TCGA-B6-A0IJ	Primary Tumor	HWUSI-EAS683_106021046:7:89:14598:13050	AE000660|TRAV19*01|Homo	20/20 nt	100	20	M94081|TRAJ57*01|Homo	59/59 nt	100	59	CALSDRSQGGSEKLVF	TRA
TCGA-B6-A0IJ	Primary Tumor	HWUSI-EAS683_106021046:7:112:3139:5185	AE000660|TRAV25*01|Homo	39/39 nt	100	39	M94081|TRAJ43*01|Homo	47/47 nt	100	47	CACNDMRF	TRA
TCGA-B6-A0IJ	Primary Tumor	HWUSI-EAS683_106021046:7:56:9286:20061	AE000660|TRAV25*01|Homo	39/39 nt	100	39	M94081|TRAJ43*01|Homo	47/47 nt	100	47	CACNDMRF	TRA
TCGA-B6-A0IJ	Primary Tumor	HWUSI-EAS683_106021046:7:53:7219:9548	M97704|TRAV23/DV6*03|Homo	38/38 nt	100	38	M94081|TRAJ42*01|Homo	52/52 nt	100	52	CSKTGRDGGSQGNLIF	TRA
TCGA-B6-A0IJ	Primary Tumor	HWUSI-EAS683_106021046:8:29:14768:4345	AE000659|TRAV8-3*01|Homo	36/36 nt	100	36	M35620|TRAJ40*01|Homo	57/57 nt	100	57	CAVASGTYKYIF	TRA
TCGA-B6-A0IJ	Primary Tumor	HWUSI-EAS683_106021046:7:52:15110:3776	AE000661|TRAV41*01|Homo	27/28 nt	96.4286	27	M94081|TRAJ33*01|Homo	56/56 nt	100	56	CAGPTDSNYQLIW	TRA
TCGA-B6-A0IJ	Primary Tumor	HWUSI-EAS683_106021046:8:38:7972:14678	AE000658|TRAV3*01|Homo	33/33 nt	100	33	M94081|TRAJ30*01|Homo	52/53 nt	98.1132	52	CCEAPRDDKIIF	TRA
TCGA-B6-A0IJ	Primary Tumor	HWUSI-EAS683_106021046:7:107:14258:13805	AE000659|TRAV10*01|Homo	41/41 nt	100	41	M94081|TRAJ26*01|Homo	49/49 nt	100	49	CVVSARGQNFVF	TRA
TCGA-B6-A0IJ	Primary Tumor	HWUSI-EAS683_106021046:7:58:13256:5978	AE000660|TRAV21*01|Homo	29/29 nt	100	29	M94081|TRAJ7*01|Homo	56/56 nt	100	56	CCAYGNNRLAF	TRA
TCGA-GM-A2DH	Primary Tumor	HWI-ST718_118408391:3:1303:10571:196313	M17659|TRAV2*02|Homo	51/52 nt	98.0769	51	M94081|TRAJ30*01|Homo	41/41 nt	100	41	CGRQMLLFTTVQYPCRDDKIIF	TRA
TCGA-GM-A2DH	Primary Tumor	HWI-ST718_118408391:3:2105:3574:119173	M17659|TRAV2*02|Homo	51/52 nt	98.0769	51	M94081|TRAJ30*01|Homo	41/41 nt	100	41	CGRQMLLFTTVQYPCRDDKIIF	TRA
TCGA-GM-A2DH	Primary Tumor	HWI-ST718_118408391:3:2204:8952:82516	M17659|TRAV2*02|Homo	51/52 nt	98.0769	51	M94081|TRAJ30*01|Homo	41/41 nt	100	41	CGRQMLLFTTVQYPCRDDKIIF	TRA
TCGA-GM-A2DH	Primary Tumor	HWI-ST718_118408391:3:2104:8496:159271	M17658|TRAV13-2*02|Homo	52/52 nt	100	52	M16747|TRAJ6*01|Homo	38/38 nt	100	38	CLLLCSPRRGGSYIPTF	TRA
TCGA-GM-A2DH	Primary Tumor	HWI-ST718_118408391:3:1104:6092:200430	M21626|TRAV14/DV4*01|Homo	66/68 nt	97.0588	66	M94081|TRAJ33*01|Homo	26/26 nt	100	26	CAMRAVMDSNYQLIW	TRA
TCGA-GM-A2DH	Primary Tumor	HWI-ST718_118408391:3:1102:9376:121054	AE000660|TRAV25*01|Homo	57/57 nt	100	57	M94081|TRAJ4*01|Homo	39/39 nt	100	39	CRNLLLCRPLSGGYNKLIF	TRA
TCGA-GM-A2DH	Primary Tumor	HWI-ST718_118408391:3:1208:3502:187518	AE000660|TRAV26-2*01|Homo	67/67 nt	100	67	AJ007774|TRAJ37*02|Homo	23/23 nt	100	23	CTTASGDDTSNTGKLIF	TRA
TCGA-GM-A2DH	Primary Tumor	HWI-ST718_118408391:3:1208:3502:187518	AE000660|TRAV26-2*01|Homo	31/34 nt	91.1765	31	AJ007774|TRAJ37*02|Homo	57/57 nt	100	57	CTTASGDDTSNTGKLIF	TRA
TCGA-GM-A2DH	Primary Tumor	HWI-ST718_118408391:3:1101:5288:137308	AE000661|TRAV38-2/DV8*01|Homo	21/21 nt	100	21	M35622|TRAJ34*01|Homo	49/49 nt	100	49	CAYSLTDKLIF	TRA
TCGA-GM-A2DH	Primary Tumor	HWI-ST718_118408391:3:1207:18689:117307	AE000661|TRAV38-2/DV8*01|Homo	47/47 nt	100	47	M35622|TRAJ34*01|Homo	49/49 nt	100	49	CAYSLTDKLIF	TRA
TCGA-GM-A2DH	Primary Tumor	HWI-ST718_118408391:3:1305:15735:46822	AE000661|TRAV38-2/DV8*01|Homo	47/47 nt	100	47	M35622|TRAJ34*01|Homo	49/49 nt	100	49	CAYSLTDKLIF	TRA
TCGA-GM-A2DH	Primary Tumor	HWI-ST718_118408391:3:2307:12226:26005	M17657|TRAV12-1*02|Homo	33/33 nt	100	33	M94081|TRAJ33*01|Homo	57/57 nt	100	57	CCSMDSNYQLIW	TRA
TCGA-A8-A0A7	Primary Tumor	HWUSI-EAS688_104463536:3:64:14126:20163	AE000659|TRAV8-1*01|Homo	55/55 nt	100	55	X02886|TRAJ22*01|Homo	41/41 nt	100	41	CAVVISSGSARQLTF	TRA
TCGA-A8-A0A7	Primary Tumor	HWUSI-EAS1559_104864694:2:49:10404:15719	AE000659|TRAV10*01|Homo	59/59 nt	100	59	M94081|TRAJ52*01|Homo	33/33 nt	100	33	CGARSAGGTSYGKLTF	TRA
TCGA-A8-A0A7	Primary Tumor	HWUSI-EAS1559_104864694:2:63:17845:6496	X04954|TRAV13-1*02|Homo	67/67 nt	100	67	M94081|TRAJ48*01|Homo	29/29 nt	100	29	CAARGNEKLTF	TRA
TCGA-A8-A0A7	Primary Tumor	HWUSI-EAS688_104463536:2:90:4641:14309	X04954|TRAV13-1*02|Homo	69/69 nt	100	69	M94081|TRAJ47*01|Homo	20/20 nt	100	20	CGNKLVF	TRA
TCGA-A8-A0A7	Primary Tumor	HWUSI-EAS688_104463536:3:104:19179:11059	X04954|TRAV13-1*02|Homo	68/69 nt	98.5507	68	M94081|TRAJ47*01|Homo	20/20 nt	100	20	CGNKLVF	TRA
TCGA-A8-A0A7	Primary Tumor	HWUSI-EAS688_104463536:1:97:4955:4612	AE000659|TRAV12-2*01|Homo	62/62 nt	100	62	M35619|TRAJ44*01|Homo	37/37 nt	100	37	CAVNIGTASKLTF	TRA
TCGA-A8-A0A7	Primary Tumor	HWUSI-EAS688_104463536:2:24:7789:9526	AE000659|TRAV12-2*01|Homo	62/62 nt	100	62	M35619|TRAJ44*01|Homo	37/37 nt	100	37	CAVNIGTASKLTF	TRA
TCGA-A8-A0A7	Primary Tumor	HWUSI-EAS688_104463536:3:24:6590:11612	AE000659|TRAV8-4*01|Homo	64/64 nt	100	64	M94081|TRAJ5*01|Homo	32/32 nt	100	32	CCDQDTGRRALTF	TRA
TCGA-A8-A0A7	Primary Tumor	HWUSI-EAS688_104463536:3:18:16666:4839	AE000659|TRAV13-2*01|Homo	63/63 nt	100	63	M94081|TRAJ27*01|Homo	35/35 nt	100	35	CLLLCRYTNAGKSTF	TRA
TCGA-A8-A0A7	Primary Tumor	HWUSI-EAS1559_104864694:2:29:6973:14803	M21626|TRAV14/DV4*01|Homo	70/70 nt	100	70	M94081|TRAJ45*01|Homo	21/21 nt	100	21	CAMREVPYMYSGGGADGLTF	TRA
TCGA-A8-A0A7	Primary Tumor	HWUSI-EAS1559_104864694:2:35:2879:11933	M21626|TRAV14/DV4*01|Homo	61/61 nt	100	61	M94081|TRAJ43*01|Homo	33/33 nt	100	33	CAMREGLSNNDMRF	TRA
TCGA-A8-A0A7	Primary Tumor	HWUSI-EAS688_104463536:3:36:6500:5726	AE000659|TRAV9-2*01|Homo	59/59 nt	100	59	M94081|TRAJ10*01|Homo	35/35 nt	100	35	CALVYTGGGNKLTF	TRA
TCGA-A8-A0A7	Primary Tumor	HWUSI-EAS1559_104864694:1:42:15162:18959	AE000659|TRAV16*01|Homo	78/78 nt	100	78	M94081|TRAJ33*01|Homo	19/20 nt	95	19	CSNRNSNYQLIW	TRA
TCGA-A8-A0A7	Primary Tumor	HWUSI-EAS688_104463536:3:119:12122:11397	AE000660|TRAV21*01|Homo	75/75 nt	100	75	M94081|TRAJ57*01|Homo	21/21 nt	100	21	CCPITQGGSEKLVF	TRA
TCGA-A8-A0A7	Primary Tumor	HWUSI-EAS688_104463536:1:76:2962:4511	AE000660|TRAV29/DV5*01|Homo	55/60 nt	91.6667	55	M94081|TRAJ57*01|Homo	33/33 nt	100	33	CSVLLCSRQWGGSEKLVF	TRA
TCGA-A8-A0A7	Primary Tumor	HWUSI-EAS688_104463536:2:107:16127:17657	AE000660|TRAV29/DV5*01|Homo	56/61 nt	91.8033	56	M94081|TRAJ57*01|Homo	33/33 nt	100	33	CSVLLCSRQWGGSEKLVF	TRA
TCGA-A8-A0A7	Primary Tumor	HWUSI-EAS688_104463536:2:43:14524:11193	M17661|TRAV24*02|Homo	24/25 nt	96	24	M94081|TRAJ53*01|Homo	62/62 nt	100	62	CASFSGGSNYKLTF	TRA
TCGA-A8-A0A7	Primary Tumor	HWUSI-EAS1559_104864694:2:118:9859:16964	AE000660|TRAV27*01|Homo	26/26 nt	100	26	M94081|TRAJ52*01|Homo	64/64 nt	100	64	CAGAAAGGTSYGKLTF	TRA
TCGA-A8-A0A7	Primary Tumor	HWUSI-EAS688_104463536:3:44:7531:19838	AE000660|TRAV22*01|Homo	39/39 nt	100	39	M94081|TRAJ52*01|Homo	53/53 nt	100	53	CAVTSSGGTSYGKLTF	TRA
TCGA-A8-A0A7	Primary Tumor	HWUSI-EAS688_104463536:3:44:12948:5460	AE000659|TRAV8-1*01|Homo	30/31 nt	96.7742	30	M94081|TRAJ43*01|Homo	51/51 nt	100	51	CRECDNNDMRF	TRA
TCGA-A8-A0A7	Primary Tumor	HWUSI-EAS1559_104864694:1:7:17970:16016	AE000658|TRAV1-2*01|Homo	41/41 nt	100	41	M94081|TRAJ42*01|Homo	55/55 nt	100	55	CAVRDKYGGSQGNLIF	TRA
TCGA-A8-A0A7	Primary Tumor	HWUSI-EAS688_104463536:1:65:13161:9490	AE000659|TRAV12-1*01|Homo	30/31 nt	96.7742	30	M94081|TRAJ39*01|Homo	57/58 nt	98.2759	57	CVVNNAGNMLAF	TRA
TCGA-A8-A0A7	Primary Tumor	HWUSI-EAS1559_104864694:2:73:2199:5756	AE000660|TRAV26-1*01|Homo	42/42 nt	100	42	M94081|TRAJ39*01|Homo	51/51 nt	100	51	CIVRVGGGNAGNMLTF	TRA
TCGA-A8-A0A7	Primary Tumor	HWUSI-EAS688_104463536:3:107:13725:12386	M21626|TRAV14/DV4*01|Homo	27/27 nt	100	27	M94081|TRAJ33*01|Homo	57/57 nt	100	57	CAMRENNKVDSNYQLIW	TRA
TCGA-A8-A0A7	Primary Tumor	HWUSI-EAS688_104463536:2:41:12238:12850	AE000661|TRAV38-2/DV8*01|Homo	20/20 nt	100	20	M94081|TRAJ30*01|Homo	54/54 nt	100	54	CAQRDRDDKIIF	TRA
TCGA-A8-A0A7	Primary Tumor	HWUSI-EAS1559_104864694:2:99:16330:11656	AE000660|TRAV19*01|Homo	25/26 nt	96.1538	25	M94081|TRAJ26*01|Homo	58/58 nt	100	58	CALSGADNYGQNFVF	TRA
TCGA-A8-A0A7	Primary Tumor	HWUSI-EAS688_104463536:2:12:19239:13693	AE000659|TRAV8-6*02|Homo	48/49 nt	97.9592	48	M94081|TRAJ23*01|Homo	47/47 nt	100	47	CAVRTGNQGGKLIF	TRA
TCGA-A8-A0A7	Primary Tumor	HWUSI-EAS1559_104864694:2:101:6667:11865	X63455|TRAV8-4*05|Homo	47/47 nt	100	47	M94081|TRAJ20*01|Homo	48/48 nt	100	48	CAVSALSNDYKLSF	TRA
TCGA-A8-A0A7	Primary Tumor	HWUSI-EAS688_104463536:1:22:10269:10436	AE000658|TRAV2*01|Homo	39/39 nt	100	39	M94081|TRAJ20*01|Homo	46/46 nt	100	46	CAVEDLRGYKLSF	TRA
TCGA-A8-A0A7	Primary Tumor	HWUSI-EAS688_104463536:2:50:10189:12361	X04946|TRAV12-2*03|Homo	36/37 nt	97.2973	36	M94081|TRAJ11*01|Homo	53/53 nt	100	53	CAVGGYSTLTF	TRA
TCGA-A8-A0A7	Primary Tumor	HWUSI-EAS688_104463536:2:79:8131:6491	AE000658|TRAV4*01|Homo	28/28 nt	100	28	M94081|TRAJ9*01|Homo	53/53 nt	100	53	CLVGNWGGGFKTIF	TRA
TCGA-GM-A2DL	Primary Tumor	HWI-ST489_119844743:4:2108:4419:73502	AE000659|TRAV6*01|Homo	65/65 nt	100	65	M94081|TRAJ13*01|Homo	33/33 nt	100	33	CALDDSGGYQKVTF	TRA
TCGA-GM-A2DL	Primary Tumor	HWI-ST489_119844743:4:1102:5150:6315	AE000659|TRAV6*01|Homo	65/65 nt	100	65	M94081|TRAJ13*01|Homo	33/33 nt	100	33	CALDDSGGYQKVTF	TRA
TCGA-GM-A2DL	Primary Tumor	HWI-ST489_119844743:4:2107:14596:106060	AE000659|TRAV6*01|Homo	65/65 nt	100	65	M94081|TRAJ13*01|Homo	33/33 nt	100	33	CALDDSGGYQKVTF	TRA
TCGA-GM-A2DL	Primary Tumor	HWI-ST489_119844743:4:1307:14168:127495	AE000659|TRAV8-1*01|Homo	51/51 nt	100	51	M35620|TRAJ40*01|Homo	44/44 nt	100	44	CAVRKTSGTYKYIF	TRA
TCGA-GM-A2DL	Primary Tumor	HWI-ST489_119844743:4:2101:8823:81147	AE000659|TRAV12-1*01|Homo	38/38 nt	100	38	M94081|TRAJ5*01|Homo	49/50 nt	98	49	CVPEARDTGRRALTF	TRA
TCGA-GM-A2DL	Primary Tumor	HWI-ST489_119844743:4:2107:3536:21420	AE000659|TRAV12-1*01|Homo	38/38 nt	100	38	M94081|TRAJ5*01|Homo	50/50 nt	100	50	CVPEARDTGRRALTF	TRA
TCGA-GM-A2DL	Primary Tumor	HWI-ST489_119844743:4:2101:5658:93901	AE000659|TRAV12-1*01|Homo	38/38 nt	100	38	M94081|TRAJ5*01|Homo	50/50 nt	100	50	CVPEARDTGRRALTF	TRA
TCGA-E2-A14V	Primary Tumor	HWI-ST698_110248407:7:7:13485:184213	X04946|TRAV12-2*03|Homo	42/42 nt	100	42	M94081|TRAJ24*02|Homo	42/42 nt	100	42	CAVNPRRPDSWGKLQF	TRA
TCGA-E2-A14V	Primary Tumor	HWI-ST698_110248407:7:67:10182:22705	AE000659|TRAV9-2*01|Homo	70/71 nt	98.5915	70	M94081|TRAJ7*01|Homo	20/20 nt	100	20	CSLPLYGNNRLAF	TRA
TCGA-E2-A14V	Primary Tumor	HWI-ST698_110248407:7:44:2150:190123	AE000660|TRAV19*01|Homo	80/83 nt	96.3855	80	M94081|TRAJ52*01|Homo	21/21 nt	100	21	CALRSAGGTSYGKLTF	TRA
TCGA-E2-A14V	Primary Tumor	HWI-ST698_110248407:7:6:16031:125451	AE000660|TRAV26-1*01|Homo	47/47 nt	100	47	X02886|TRAJ22*01|Homo	43/43 nt	100	43	CTIASPYLPGSARQLTF	TRA
TCGA-E2-A14V	Primary Tumor	HWI-ST698_110248407:7:43:5409:129923	AE000660|TRAV34*01|Homo	59/59 nt	100	59	AC023226|TRAJ13*02|Homo	40/40 nt	100	40	CGADYSGGYQKVTF	TRA
TCGA-E2-A14V	Primary Tumor	HWI-ST698_110248407:7:3:4627:109111	AE000660|TRAV29/DV5*01|Homo	23/23 nt	100	23	M94081|TRAJ39*01|Homo	56/56 nt	100	56	CSKRGNAGNMLTF	TRA
TCGA-E2-A14V	Primary Tumor	HWI-ST698_110248407:7:22:20434:55293	AE000659|TRAV12-1*01|Homo	27/27 nt	100	27	X02885|TRAJ12*01|Homo	60/60 nt	100	60	CVVYGMDSSYKLIF	TRA
TCGA-E2-A14V	Primary Tumor	HWI-ST698_110248407:7:68:4977:19945	AE000659|TRAV12-1*01|Homo	27/27 nt	100	27	X02885|TRAJ12*01|Homo	60/60 nt	100	60	CVVYGMDSSYKLIF	TRA
TCGA-BH-A1EY	Primary Tumor	HWI-ST467_114519247:6:1108:12993:172723	AE000658|TRAV2*01|Homo	69/69 nt	100	69	M94081|TRAJ32*01|Homo	24/24 nt	100	24	CAVEDLGGATNKLIF	TRA
TCGA-BH-A1EY	Primary Tumor	HWI-ST514_114051223:1:1106:11327:176232	AE000658|TRAV2*01|Homo	69/69 nt	100	69	M94081|TRAJ32*01|Homo	24/24 nt	100	24	CAVEDLGGATNKLIF	TRA
TCGA-BH-A1EY	Primary Tumor	HWI-ST467_114519247:7:1107:6603:67398	AE000659|TRAV14/DV4*02|Homo	72/73 nt	98.6301	72	M94081|TRAJ4*01|Homo	22/23 nt	95.6522	22	CNERGFFSCGYNKLIF	TRA
TCGA-BH-A1EY	Primary Tumor	HWI-ST467_114519247:6:1201:18850:17259	AE000659|TRAV9-2*01|Homo	75/75 nt	100	75	M35619|TRAJ44*01|Homo	23/23 nt	100	23	CALHTGTASKLTF	TRA
TCGA-BH-A1EY	Primary Tumor	HWI-ST467_114519247:6:2202:20189:140552	AE000659|TRAV8-6*02|Homo	66/66 nt	100	66	M35620|TRAJ40*01|Homo	28/28 nt	100	28	CAVTPSSGTYKYIF	TRA
TCGA-BH-A1EY	Primary Tumor	HWI-ST718_114371741:1:2206:18157:31590	AE000660|TRAV27*01|Homo	56/56 nt	100	56	M94081|TRAJ42*01|Homo	44/46 nt	95.6522	44	CAGGSQGNLIF	TRA
TCGA-BH-A1EY	Primary Tumor	HWI-ST718_114371741:1:2307:9274:87954	AE000660|TRAV27*01|Homo	56/56 nt	100	56	M94081|TRAJ42*01|Homo	48/48 nt	100	48	CAGGSQGNLIF	TRA
TCGA-BH-A1EY	Primary Tumor	HWI-ST718_114371741:1:2205:9686:164254	AE000660|TRAV29/DV5*01|Homo	69/70 nt	98.5714	69	AF033825|TRAJ47*02|Homo	23/23 nt	100	23	CAASERVYGNKLVF	TRA
TCGA-BH-A1EY	Primary Tumor	HWI-ST467_114519247:6:2201:17132:166651	AE000660|TRAV30*01|Homo	49/49 nt	100	49	X02886|TRAJ22*01|Homo	45/45 nt	100	45	CGLASSGSARQLTF	TRA
TCGA-BH-A1EY	Primary Tumor	HWI-ST514_114051223:1:1106:3836:49674	AE000661|TRAV39*01|Homo	56/58 nt	96.5517	56	M94081|TRAJ49*01|Homo	38/38 nt	100	38	CAVGTTGNQFYF	TRA
TCGA-BH-A1EY	Primary Tumor	HWI-ST467_114519247:6:1201:18850:17259	AE000659|TRAV9-2*01|Homo	24/24 nt	100	24	M35619|TRAJ44*01|Homo	60/60 nt	100	60	CALHTGTASKLTF	TRA
TCGA-BH-A1EY	Primary Tumor	HWI-ST718_114371741:1:1104:15698:80663	AE000661|TRAV39*01|Homo	35/35 nt	100	35	M35620|TRAJ40*01|Homo	45/45 nt	100	45	CRGNFKSLMVSGTYKYIF	TRA
TCGA-BH-A1EY	Primary Tumor	HWI-ST718_114371741:1:1305:2303:181851	AE000660|TRAV23/DV6*01|Homo	27/27 nt	100	27	M94081|TRAJ36*01|Homo	57/57 nt	100	57	CAARGETGANNLFF	TRA
TCGA-BH-A1EY	Primary Tumor	HWI-ST718_114371741:1:1105:4861:172522	AE000658|TRAV2*01|Homo	26/26 nt	100	26	M94081|TRAJ33*01|Homo	55/56 nt	98.2143	55	CAVEESNYQLIW	TRA
TCGA-BH-A1EY	Primary Tumor	HWI-ST718_114371741:1:1107:16520:5001	AE000659|TRAV8-3*01|Homo	26/26 nt	100	26	M94081|TRAJ26*01|Homo	56/56 nt	100	56	CAVGANYGQNFVF	TRA
TCGA-BH-A1EY	Primary Tumor	HWI-ST718_114371741:1:2108:5431:37482	AE000661|TRAV39*01|Homo	57/63 nt	90.4762	57	M94081|TRAJ24*02|Homo	34/35 nt	97.1429	34	CHLLLSTDSWEKLQF	TRA
TCGA-BH-A1EY	Primary Tumor	HWI-ST514_114051223:1:2101:20684:197611	AE000660|TRAV29/DV5*01|Homo	32/32 nt	100	32	M94081|TRAJ13*01|Homo	57/57 nt	100	57	CGSRTGGYQKVTF	TRA
TCGA-BH-A1EY	Primary Tumor	HWI-ST718_114371741:1:1302:11475:6034	AE000659|TRAV13-2*01|Homo	46/46 nt	100	46	M94081|TRAJ4*01|Homo	49/49 nt	100	49	CAENGSGYNKLIF	TRA
TCGA-AN-A0FF	Primary Tumor	HWUSI-EAS688_105311153:2:109:14325:16619	AE000658|TRAV1-2*01|Homo	56/56 nt	100	56	M94081|TRAJ13*01|Homo	38/38 nt	100	38	CLLPLCCERWGSGGYQKVTF	TRA
TCGA-AN-A0FF	Primary Tumor	HWUSI-EAS688_105311153:1:39:3198:11433	M12959|TRAV8-4*04|Homo	65/65 nt	100	65	M94081|TRAJ45*01|Homo	30/30 nt	100	30	CAVSDLHSGGGADGLTF	TRA
TCGA-AN-A0FF	Primary Tumor	HWUSI-EAS688_105311153:2:15:1393:14700	AE000659|TRAV13-2*01|Homo	62/62 nt	100	62	X05775|TRAJ15*01|Homo	32/32 nt	100	32	CLLLCRDPRAGTALIF	TRA
TCGA-AN-A0FF	Primary Tumor	HWUSI-EAS688_105311153:1:93:15733:15160	AE000659|TRAV8-6*02|Homo	61/61 nt	100	61	M94081|TRAJ27*01|Homo	33/33 nt	100	33	CAVSDQDNAGKSTF	TRA
TCGA-AN-A0FF	Primary Tumor	HWUSI-EAS688_105311153:1:81:6224:18787	AE000660|TRAV25*01|Homo	68/68 nt	100	68	M94081|TRAJ38*01|Homo	22/22 nt	100	22	CAALSAGNNRKLIW	TRA
TCGA-AN-A0FF	Primary Tumor	HWUSI-EAS688_105311153:2:9:6473:7694	AE000659|TRAV8-2*01|Homo	36/36 nt	100	36	M94081|TRAJ48*01|Homo	59/59 nt	100	59	CVVRATNFGNEKLTF	TRA
TCGA-AN-A0FF	Primary Tumor	HWUSI-EAS688_105311153:2:84:12154:14502	AE000660|TRAV25*01|Homo	22/22 nt	100	22	M94081|TRAJ38*01|Homo	58/58 nt	100	58	CAALSAGNNRKLIW	TRA
TCGA-AN-A0FF	Primary Tumor	HWUSI-EAS688_105311153:2:1:16502:16615	AE000660|TRAV25*01|Homo	33/33 nt	100	33	M94081|TRAJ38*01|Homo	57/57 nt	100	57	CAALSAGNNRKLIW	TRA
TCGA-AN-A0FF	Primary Tumor	HWUSI-EAS688_105311153:1:107:8799:16300	AE000659|TRAV8-6*02|Homo	41/41 nt	100	41	M94081|TRAJ27*01|Homo	53/53 nt	100	53	CAVSDQDNAGKSTF	TRA
TCGA-AN-A0FF	Primary Tumor	HWUSI-EAS688_105311153:2:15:1393:14700	AE000659|TRAV13-2*01|Homo	20/20 nt	100	20	X05775|TRAJ15*01|Homo	53/53 nt	100	53	CLLLCRDPRAGTALIF	TRA
TCGA-AN-A0FF	Primary Tumor	HWUSI-EAS688_105311153:1:89:7974:6588	AE000659|TRAV5*01|Homo	36/36 nt	100	36	M16747|TRAJ6*01|Homo	61/61 nt	100	61	CAEKASGGSYIPTF	TRA
TCGA-GM-A2DF	Primary Tumor	HWI-ST489_118346118:4:2304:16188:60750	AE000659|TRAV8-1*01|Homo	58/58 nt	100	58	AC023226|TRAJ13*02|Homo	40/40 nt	100	40	CAVINSGGYQKVTF	TRA
TCGA-GM-A2DF	Primary Tumor	HWI-ST489_118346118:4:1206:16670:157039	AE000659|TRAV16*01|Homo	56/56 nt	100	56	M94081|TRAJ26*01|Homo	41/41 nt	100	41	CALSGRNYGQNFVF	TRA
TCGA-GM-A2DF	Primary Tumor	HWI-ST489_118346118:4:2104:6993:119089	AE000659|TRAV16*01|Homo	56/56 nt	100	56	M94081|TRAJ26*01|Homo	41/41 nt	100	41	CALSGRNYGQNFVF	TRA
TCGA-GM-A2DF	Primary Tumor	HWI-ST489_118346118:4:1301:18902:117424	AE000660|TRAV29/DV5*01|Homo	65/65 nt	100	65	M94081|TRAJ49*01|Homo	28/28 nt	100	28	CSVLLCSKRVLNTGNQFYF	TRA
TCGA-GM-A2DF	Primary Tumor	HWI-ST489_118346118:4:1203:4575:20714	AE000660|TRAV29/DV5*01|Homo	59/59 nt	100	59	M94081|TRAJ43*01|Homo	30/30 nt	100	30	CTSVQQARHPYNNNDMRF	TRA
TCGA-GM-A2DF	Primary Tumor	HWI-ST489_118346118:4:1304:19243:54818	AE000660|TRAV35*01|Homo	69/69 nt	100	69	M94081|TRAJ36*01|Homo	24/24 nt	100	24	CAGHTIQTGANNLFF	TRA
TCGA-GM-A2DF	Primary Tumor	HWI-ST489_118346118:4:1203:4575:20714	AE000660|TRAV29/DV5*01|Homo	22/22 nt	100	22	M94081|TRAJ43*01|Homo	54/54 nt	100	54	CTSVQQARHPYNNNDMRF	TRA
TCGA-A8-A06X	Primary Tumor	HWI-EAS109_104421614:1:18:18134:16262	AE000659|TRAV13-1*01|Homo	67/68 nt	98.5294	67	M94081|TRAJ8*01|Homo	29/29 nt	100	29	CLLLCSKYENTGFQKLVF	TRA
TCGA-A8-A06X	Primary Tumor	HWI-EAS109_104421614:3:97:15628:12352	AE000661|TRAV38-1*01|Homo	70/70 nt	100	70	M94081|TRAJ49*01|Homo	22/22 nt	100	22	CAFMNPLDQFYF	TRA
TCGA-A8-A06X	Primary Tumor	HWI-EAS292_106003111:3:69:8838:2220	AE000661|TRAV38-1*01|Homo	52/52 nt	100	52	M94081|TRAJ49*01|Homo	40/40 nt	100	40	CAFMNPLDQFYF	TRA
TCGA-A8-A06X	Primary Tumor	HWI-EAS109_104421614:2:36:14992:9745	AE000661|TRAV38-1*01|Homo	48/48 nt	100	48	M94081|TRAJ49*01|Homo	44/44 nt	100	44	CAFMNPLDQFYF	TRA
TCGA-A8-A06X	Primary Tumor	HWI-EAS109_104421614:3:19:3293:16510	AE000659|TRAV13-1*01|Homo	42/42 nt	100	42	M94081|TRAJ52*01|Homo	44/44 nt	100	44	CLLLCSIREHGGGTSYGKLTF	TRA
TCGA-A8-A06X	Primary Tumor	HWI-EAS109_104421614:2:41:17954:18034	AE000659|TRAV13-1*01|Homo	47/47 nt	100	47	M94081|TRAJ42*01|Homo	52/52 nt	100	52	CLLLCSKNGGSQGNLIF	TRA
TCGA-D8-A142	Primary Tumor	HWUSI-EAS404_110115889:8:32:19265:14385	AE000658|TRAV4*01|Homo	70/70 nt	100	70	M94081|TRAJ10*01|Homo	25/26 nt	96.1538	25	CLVGWSGGGNKLTF	TRA
TCGA-D8-A142	Primary Tumor	HWUSI-EAS404_110115889:8:8:17132:4993	AE000658|TRAV4*01|Homo	70/70 nt	100	70	M94081|TRAJ10*01|Homo	26/26 nt	100	26	CLVGWSGGGNKLTF	TRA
TCGA-D8-A142	Primary Tumor	HWUSI-EAS404_110115889:7:22:18156:19810	AE000659|TRAV8-1*01|Homo	70/71 nt	98.5915	70	M35619|TRAJ44*01|Homo	22/22 nt	100	22	CAVTPATGTASKLTF	TRA
TCGA-D8-A142	Primary Tumor	HWUSI-EAS404_110115889:8:106:2225:10811	AE000659|TRAV8-3*01|Homo	74/74 nt	100	74	M94081|TRAJ39*01|Homo	22/22 nt	100	22	CAVALNNAGNMLTF	TRA
TCGA-D8-A142	Primary Tumor	HWUSI-EAS404_110115889:7:6:18239:4664	AE000659|TRAV8-3*01|Homo	49/49 nt	100	49	M94081|TRAJ43*01|Homo	47/47 nt	100	47	CAVATNNDMRF	TRA
TCGA-D8-A142	Primary Tumor	HWUSI-EAS404_110115889:8:60:5104:20738	X04954|TRAV13-1*02|Homo	69/69 nt	100	69	M94081|TRAJ39*01|Homo	27/27 nt	100	27	CLLLCSKWGNAGNMLTF	TRA
TCGA-D8-A142	Primary Tumor	HWUSI-EAS404_110115889:7:112:1887:20948	AE000660|TRAV25*01|Homo	78/78 nt	100	78	M16747|TRAJ6*01|Homo	20/20 nt	100	20	CAGGGGSYIPTF	TRA
TCGA-D8-A142	Primary Tumor	HWUSI-EAS404_110115889:7:63:18486:4115	AE000660|TRAV26-2*01|Homo	66/66 nt	100	66	X02886|TRAJ22*01|Homo	30/30 nt	100	30	CILRVPSSGSARQLTF	TRA
TCGA-D8-A142	Primary Tumor	HWUSI-EAS404_110115889:7:78:12844:6783	AE000660|TRAV26-2*01|Homo	66/66 nt	100	66	X02886|TRAJ22*01|Homo	30/30 nt	100	30	CILRVPSSGSARQLTF	TRA
TCGA-D8-A142	Primary Tumor	HWUSI-EAS404_110115889:8:114:1091:5018	AE000661|TRAV38-2/DV8*01|Homo	42/42 nt	100	42	M94081|TRAJ56*01|Homo	50/50 nt	100	50	CAYRRTFTGANSKLTF	TRA
TCGA-D8-A142	Primary Tumor	HWUSI-EAS404_110115889:7:12:12801:17698	AE000660|TRAV29/DV5*01|Homo	22/22 nt	100	22	M94081|TRAJ39*01|Homo	58/58 nt	100	58	CAAEGNNAGNMLTF	TRA
TCGA-D8-A142	Primary Tumor	HWUSI-EAS404_110115889:7:12:12801:17698	AE000660|TRAV29/DV5*01|Homo	20/21 nt	95.2381	20	M94081|TRAJ39*01|Homo	58/58 nt	100	58	CAAEGNNAGNMLTF	TRA
TCGA-D8-A142	Primary Tumor	HWUSI-EAS404_110115889:8:60:5104:20738	X04954|TRAV13-1*02|Homo	19/19 nt	100	19	M94081|TRAJ39*01|Homo	56/56 nt	100	56	CSKWGNAGNMLTF	TRA
TCGA-D8-A142	Primary Tumor	HWUSI-EAS404_110115889:7:88:9523:6207	AE000661|TRAV38-1*01|Homo	43/43 nt	100	43	M94081|TRAJ38*01|Homo	54/54 nt	100	54	CDHAGNNRKLIW	TRA
TCGA-D8-A142	Primary Tumor	HWUSI-EAS404_110115889:7:25:5815:3255	AE000659|TRAV9-2*01|Homo	47/47 nt	100	47	AF532854|TRAJ32*02|Homo	48/48 nt	100	48	CALSEGYGGATNKLIF	TRA
TCGA-D8-A142	Primary Tumor	HWUSI-EAS404_110115889:7:84:12932:13329	AE000661|TRAV38-2/DV8*01|Homo	48/49 nt	97.9592	48	M94081|TRAJ30*01|Homo	48/48 nt	100	48	CISVLMGPNRDDKIIF	TRA
TCGA-D8-A142	Primary Tumor	HWUSI-EAS404_110115889:8:36:8001:13384	AE000659|TRAV12-1*01|Homo	26/26 nt	100	26	M94081|TRAJ21*01|Homo	50/50 nt	100	50	CVVNSFNKFYF	TRA
TCGA-D8-A142	Primary Tumor	HWUSI-EAS404_110115889:7:19:5054:2623	AE000660|TRAV22*01|Homo	43/43 nt	100	43	M94081|TRAJ10*01|Homo	49/49 nt	100	49	CALRGLTGGGNKLTF	TRA
TCGA-D8-A142	Primary Tumor	HWUSI-EAS404_110115889:8:32:19265:14385	AE000658|TRAV4*01|Homo	19/19 nt	100	19	M94081|TRAJ10*01|Homo	57/57 nt	100	57	CLVGWSGGGNKLTF	TRA
TCGA-D8-A142	Primary Tumor	HWUSI-EAS404_110115889:8:8:17132:4993	AE000658|TRAV4*01|Homo	19/19 nt	100	19	M94081|TRAJ10*01|Homo	57/57 nt	100	57	CLVGWSGGGNKLTF	TRA
TCGA-AO-A03V	Primary Tumor	HWI-ST466_110055622:8:42:13749:80540	AE000658|TRAV1-2*01|Homo	56/56 nt	100	56	M94081|TRAJ33*01|Homo	46/46 nt	100	46	CAVRDSNYQLIW	TRA
TCGA-AO-A03V	Primary Tumor	HWI-ST466_110055622:8:68:20737:151272	M17656|TRAV12-3*02|Homo	66/66 nt	100	66	M94081|TRAJ49*01|Homo	31/31 nt	100	31	CAMSVAGNQFYF	TRA
TCGA-AO-A03V	Primary Tumor	HWI-ST466_110055622:8:21:12780:42232	AE000660|TRAV35*01|Homo	22/22 nt	100	22	M94081|TRAJ54*01|Homo	55/55 nt	100	55	CAGHLGQGAQKLVF	TRA
TCGA-AO-A03V	Primary Tumor	HWI-ST466_110055622:8:5:20793:29037	AE000660|TRAV24*01|Homo	27/27 nt	100	27	M94081|TRAJ41*01|Homo	61/61 nt	100	61	CALNSNSGYALNF	TRA
TCGA-WT-AB41	Primary Tumor	HWI-ST514:146274248:C4VEDACXX:5:2116:8476:53912	AE000659|TRAV10*01|Homo	76/76 nt	100	76	M94081|TRAJ48*01|Homo	19/19 nt	100	19	CGELRFGNEKLTF	TRA
TCGA-WT-AB41	Primary Tumor	HWI-ST514:146274248:C4VEDACXX:5:1108:11366:64449	AE000659|TRAV10*01|Homo	50/50 nt	100	50	M94081|TRAJ42*01|Homo	47/47 nt	100	47	CVVSARGSQGNLIF	TRA
TCGA-WT-AB41	Primary Tumor	HWI-ST514:146274248:C4VEDACXX:5:2210:10662:56325	AE000659|TRAV10*01|Homo	50/50 nt	100	50	M94081|TRAJ42*01|Homo	47/47 nt	100	47	CVVSARGSQGNLIF	TRA
TCGA-WT-AB41	Primary Tumor	HWI-ST514:146274248:C4VEDACXX:5:2201:13395:92898	AE000660|TRAV25*01|Homo	74/74 nt	100	74	M94081|TRAJ9*01|Homo	24/24 nt	100	24	CAAGNTGGFKTIF	TRA
TCGA-WT-AB41	Primary Tumor	HWI-ST514:146274248:C4VEDACXX:3:1205:6363:56559	AE000661|TRAV39*01|Homo	60/60 nt	100	60	M94081|TRAJ33*01|Homo	33/33 nt	100	33	CAVGGPDSNYQLIW	TRA
TCGA-WT-AB41	Primary Tumor	HWI-ST514:146274248:C4VEDACXX:5:2113:8085:94576	AE000660|TRAV21*01|Homo	20/20 nt	100	20	M94081|TRAJ30*01|Homo	53/53 nt	100	53	CAVNGGRDDKIIF	TRA
TCGA-AQ-A04J	Primary Tumor	HWUSI-EAS712_105804522:1:30:16566:3036	AE000659|TRAV6*01|Homo	58/58 nt	100	58	AF532854|TRAJ32*02|Homo	38/38 nt	100	38	CALRGGATNKLIF	TRA
TCGA-AQ-A04J	Primary Tumor	HWUSI-EAS712_105804522:2:26:14401:13278	AE000659|TRAV8-3*01|Homo	53/53 nt	100	53	M94081|TRAJ43*01|Homo	43/43 nt	100	43	CAVGGGDMRF	TRA
TCGA-AQ-A04J	Primary Tumor	HWUSI-EAS712_105804522:2:112:13350:18607	AE000660|TRAV19*01|Homo	51/51 nt	100	51	M94081|TRAJ13*01|Homo	43/43 nt	100	43	CALSSPSGGYQKVTF	TRA
TCGA-AQ-A04J	Primary Tumor	HWUSI-EAS712_105804522:2:111:7899:3404	M95394|TRAV38-1*03|Homo	61/61 nt	100	61	M94081|TRAJ41*01|Homo	30/30 nt	100	30	CALPKSNSNSGYALNF	TRA
TCGA-AQ-A04J	Primary Tumor	HWUSI-EAS712_105804522:2:26:1524:16530	M95394|TRAV38-1*03|Homo	55/55 nt	100	55	M35620|TRAJ40*01|Homo	43/43 nt	100	43	CAFQGTYKYIF	TRA
TCGA-AQ-A04J	Primary Tumor	HWUSI-EAS712_105804522:1:88:15206:14705	AE000661|TRAV38-2/DV8*01|Homo	67/67 nt	100	67	M94081|TRAJ45*01|Homo	32/32 nt	100	32	CAYRSLYSGGGADGLTF	TRA
TCGA-AQ-A04J	Primary Tumor	HWUSI-EAS712_105804522:2:7:17337:14972	M81774|TRAV12-2*02|Homo	21/21 nt	100	21	M94081|TRAJ42*01|Homo	58/58 nt	100	58	CAVGGSQGNLIF	TRA
TCGA-AQ-A04J	Primary Tumor	HWUSI-EAS712_105804522:1:116:14947:20188	AE000660|TRAV27*01|Homo	21/21 nt	100	21	M94081|TRAJ42*01|Homo	56/56 nt	100	56	CAGEGSQGNLIF	TRA
TCGA-AQ-A04J	Primary Tumor	HWUSI-EAS712_105804522:1:53:16646:9295	AE000660|TRAV17*01|Homo	43/44 nt	97.7273	43	X05773|TRAJ17*01|Homo	55/55 nt	100	55	CATGKAAGNKLTF	TRA
TCGA-AQ-A04J	Primary Tumor	HWUSI-EAS712_105804522:2:30:11302:20025	AE000658|TRAV3*01|Homo	20/20 nt	100	20	M94081|TRAJ10*01|Homo	59/59 nt	100	59	CTGGGNKLTF	TRA
TCGA-EW-A1P3	Primary Tumor	HWI-ST648_115345859:4:1203:7403:119699	M21626|TRAV14/DV4*01|Homo	31/31 nt	100	31	M94081|TRAJ56*01|Homo	55/55 nt	100	55	CAMREVIRSGANSKLTF	TRA
TCGA-AN-A0XS	Primary Tumor	HWUSI-EAS776_108553288:7:111:8464:6505	AE000659|TRAV6*01|Homo	71/71 nt	100	71	M94081|TRAJ33*01|Homo	23/23 nt	100	23	CRLSYLPLCSAQDSNYQLIW	TRA
TCGA-AN-A0XS	Primary Tumor	HWUSI-EAS776_108553288:7:42:7074:1138	AE000659|TRAV6*01|Homo	71/71 nt	100	71	M94081|TRAJ33*01|Homo	23/23 nt	100	23	CRLSYLPLCSAQDSNYQLIW	TRA
TCGA-AN-A0XS	Primary Tumor	HWUSI-EAS776_108553288:7:71:19631:14110	AE000659|TRAV14/DV4*02|Homo	71/71 nt	100	71	M94081|TRAJ36*01|Homo	24/24 nt	100	24	CAMREGSSGANNLFF	TRA
TCGA-AN-A0XS	Primary Tumor	HWUSI-EAS776_108553288:7:52:16134:1294	AE000660|TRAV19*01|Homo	63/64 nt	98.4375	63	M94081|TRAJ27*01|Homo	37/37 nt	100	37	CALSGGTNAGKSTF	TRA
TCGA-AN-A0XS	Primary Tumor	HWUSI-EAS776_108553288:8:16:10018:19557	M97704|TRAV23/DV6*03|Homo	71/71 nt	100	71	M94081|TRAJ4*01|Homo	24/24 nt	100	24	CAASPGFSGGYNKLIF	TRA
TCGA-AN-A0XS	Primary Tumor	HWUSI-EAS776_108553288:7:61:5295:19840	M12959|TRAV8-4*04|Homo	44/45 nt	97.7778	44	M94081|TRAJ52*01|Homo	49/49 nt	100	49	CALGNAGGTSYGKLTF	TRA
TCGA-AN-A0XS	Primary Tumor	HWUSI-EAS776_108553288:8:7:18800:9496	AE000661|TRAV41*01|Homo	44/44 nt	100	44	M94081|TRAJ42*01|Homo	53/53 nt	100	53	CRLHLCCQGNYGGSQGNLIF	TRA
TCGA-AO-A0J2	Primary Tumor	HWI-ST434_105923907:2:63:18136:199645	AE000659|TRAV14/DV4*02|Homo	73/74 nt	98.6486	73	M94081|TRAJ53*01|Homo	21/21 nt	100	21	CNERLTGGSNYKLTF	TRA
TCGA-AO-A0J2	Primary Tumor	HWI-ST434_105923907:2:42:4117:186286	AE000659|TRAV9-2*01|Homo	78/78 nt	100	78	M94081|TRAJ54*01|Homo	20/20 nt	100	20	CALSDQGAQKLVF	TRA
TCGA-AO-A0J2	Primary Tumor	HWI-ST434_105923907:2:24:4412:74040	AE000659|TRAV9-2*01|Homo	63/63 nt	100	63	M16747|TRAJ6*01|Homo	35/35 nt	100	35	CALKGGSYIPTF	TRA
TCGA-AO-A0J2	Primary Tumor	HWI-ST434_105923907:2:5:6328:189183	AE000659|TRAV9-2*01|Homo	63/63 nt	100	63	M16747|TRAJ6*01|Homo	34/35 nt	97.1429	34	CALKGGSYIPTF	TRA
TCGA-AO-A0J2	Primary Tumor	HWI-ST434_105923907:2:24:4412:74040	AE000660|TRAV19*01|Homo	20/22 nt	90.9091	20	M16747|TRAJ6*01|Homo	55/55 nt	100	55	CALKGGSYIPTF	TRA
TCGA-E9-A22D	Primary Tumor	HWI-ST118_114252664:5:1208:12631:137446	AE000658|TRAV2*01|Homo	68/68 nt	100	68	M94081|TRAJ33*01|Homo	25/25 nt	100	25	CCCLLLCCGGSKVDSNYQLIW	TRA
TCGA-E9-A22D	Primary Tumor	HWI-ST118_114252664:5:2107:20203:2373	AE000658|TRAV2*01|Homo	63/68 nt	92.6471	63	M94081|TRAJ33*01|Homo	24/24 nt	100	24	CCCLLLCGGGPKGDSNYQLIW	TRA
TCGA-E9-A22D	Primary Tumor	HWI-ST118_114252664:5:2106:9113:84303	M17657|TRAV12-1*02|Homo	70/72 nt	97.2222	70	M94081|TRAJ8*01|Homo	19/19 nt	100	19	CGASRDTGFQKLVF	TRA
TCGA-E9-A22D	Primary Tumor	HWI-ST118_114252664:6:2202:12298:77161	AE000659|TRAV8-2*01|Homo	58/58 nt	100	58	M16747|TRAJ6*01|Homo	38/38 nt	100	38	CVVSERGGSYIPTF	TRA
TCGA-E9-A22D	Primary Tumor	HWI-ST118_114252664:6:1202:1774:192283	AE000659|TRAV9-2*01|Homo	76/76 nt	100	76	M94081|TRAJ24*02|Homo	19/19 nt	100	19	CALQVDSWGKLQF	TRA
TCGA-E9-A22D	Primary Tumor	HWI-ST118_114252664:6:2107:5790:194864	AE000659|TRAV9-2*01|Homo	76/76 nt	100	76	M94081|TRAJ24*02|Homo	19/19 nt	100	19	CALQVDSWGKLQF	TRA
TCGA-E9-A22D	Primary Tumor	HWI-ST118_114252664:5:1203:3349:18514	AE000659|TRAV9-2*01|Homo	76/76 nt	100	76	M94081|TRAJ24*02|Homo	19/19 nt	100	19	CALQVDSWGKLQF	TRA
TCGA-E9-A22D	Primary Tumor	HWI-ST118_114252664:5:1102:9757:73395	AE000659|TRAV16*01|Homo	42/42 nt	100	42	M94081|TRAJ53*01|Homo	56/56 nt	100	56	CITVLWGGSNYKLTF	TRA
TCGA-E9-A22D	Primary Tumor	HWI-ST118_114252664:5:1103:8768:23874	AE000659|TRAV16*01|Homo	42/42 nt	100	42	M94081|TRAJ53*01|Homo	56/56 nt	100	56	CITVLWGGSNYKLTF	TRA
TCGA-E9-A22D	Primary Tumor	HWI-ST118_114252664:6:2201:9810:109592	AE000660|TRAV17*01|Homo	45/45 nt	100	45	M35622|TRAJ34*01|Homo	52/52 nt	100	52	CATDENTDKLIF	TRA
TCGA-E9-A22D	Primary Tumor	HWI-ST118_114252664:4:1107:14625:144410	AE000658|TRAV1-1*01|Homo	35/35 nt	100	35	M94081|TRAJ27*01|Homo	45/47 nt	95.7447	45	CLLLLRCGRGRQINLW	TRA
TCGA-E9-A22D	Primary Tumor	HWI-ST118_114252664:6:1203:12104:118089	AE000659|TRAV10*01|Homo	38/38 nt	100	38	M94081|TRAJ18*01|Homo	59/59 nt	100	59	CVVSGYRGSTLGRLYF	TRA
TCGA-E9-A22D	Primary Tumor	HWI-ST118_114252664:5:1203:1585:137766	AE000659|TRAV10*01|Homo	34/35 nt	97.1429	34	M94081|TRAJ18*01|Homo	59/59 nt	100	59	CVVSGYRGSTLGRLYF	TRA
TCGA-E9-A22D	Primary Tumor	HWI-ST118_114252664:5:2108:1100:138995	AE000659|TRAV13-1*01|Homo	44/46 nt	95.6522	44	M94081|TRAJ9*01|Homo	59/59 nt	100	59	CAVNTGGFKTIF	TRA
TCGA-E9-A22D	Primary Tumor	HWI-ST118_114252664:5:2108:1095:138973	AE000659|TRAV13-1*01|Homo	44/46 nt	95.6522	44	M94081|TRAJ9*01|Homo	59/59 nt	100	59	CAVNTGGFKTIF	TRA
TCGA-AN-A0AR	Primary Tumor	HWUSI-EAS776_104635394:4:110:2584:3298	AE000659|TRAV8-6*02|Homo	48/48 nt	100	48	M94081|TRAJ39*01|Homo	47/47 nt	100	47	CCEGHNAGNMLTF	TRA
TCGA-OL-A5RU	Primary Tumor	HWI-ST791:138827774:D21W4ACXX:6:1207:3602:46873	AE000658|TRAV3*01|Homo	57/57 nt	100	57	X02886|TRAJ22*01|Homo	39/39 nt	100	39	CAVRDPISSGSARQLTF	TRA
TCGA-OL-A5RU	Primary Tumor	HWI-ST791:138827774:D21W4ACXX:5:1308:17668:92513	AE000659|TRAV5*01|Homo	25/25 nt	100	25	M94081|TRAJ37*01|Homo	62/62 nt	100	62	CAEEHGSGNTGKLIF	TRA
TCGA-OL-A5RU	Primary Tumor	HWI-ST791:138827774:D21W4ACXX:6:1310:5651:81358	X63455|TRAV8-4*05|Homo	42/42 nt	100	42	M94081|TRAJ21*01|Homo	49/49 nt	100	49	CAVSDGGNFNKFYF	TRA
TCGA-AN-A0XT	Primary Tumor	HWUSI-EAS688_108506932:4:33:5976:2394	AE000658|TRAV1-2*01|Homo	62/62 nt	100	62	X05773|TRAJ17*01|Homo	25/25 nt	100	25	CAVRDETAGAAGNKLTF	TRA
TCGA-AN-A0XT	Primary Tumor	HWUSI-EAS688_108506932:4:6:4814:1585	AE000659|TRAV13-1*01|Homo	76/76 nt	100	76	M94081|TRAJ33*01|Homo	22/24 nt	91.6667	22	CAASMGRNYQLIW	TRA
TCGA-C8-A137	Primary Tumor	HWUSI-EAS575_108808500:7:39:13136:1010#0	M17657|TRAV12-1*02|Homo	58/58 nt	100	58	M94081|TRAJ38*01|Homo	28/28 nt	100	28	CVVPRTGNNRKLIW	TRA
TCGA-C8-A137	Primary Tumor	HWUSI-EAS688_109209220:8:100:18778:1798	AE000659|TRAV8-3*01|Homo	64/65 nt	98.4615	64	M94081|TRAJ21*01|Homo	35/35 nt	100	35	CAVGDNFNKFYF	TRA
TCGA-B6-A2IU	Primary Tumor	HWI-ST664_119845270:8:1206:18376:61691	AE000659|TRAV9-2*01|Homo	67/67 nt	100	67	M94081|TRAJ46*01|Homo	35/35 nt	100	35	CALKSSGDKLTF	TRA
TCGA-D8-A13Z	Primary Tumor	HWUSI-EAS227_109445579:8:111:5268:4382	AE000658|TRAV4*01|Homo	50/50 nt	100	50	M94081|TRAJ30*01|Homo	45/45 nt	100	45	CLVARNRDDKIIF	TRA
TCGA-D8-A13Z	Primary Tumor	HWUSI-EAS227_109445579:8:65:7990:7803	M81774|TRAV12-2*02|Homo	59/59 nt	100	59	AC023226|TRAJ13*02|Homo	41/41 nt	100	41	CAVSGGYQKVTF	TRA
TCGA-D8-A13Z	Primary Tumor	HWUSI-EAS227_109445579:8:48:8504:9327	AE000659|TRAV16*01|Homo	72/72 nt	100	72	M94081|TRAJ33*01|Homo	23/23 nt	100	23	CSYMDSNYQLIW	TRA
TCGA-D8-A13Z	Primary Tumor	HWUSI-EAS227_109445579:8:62:15285:9865	M97704|TRAV23/DV6*03|Homo	51/51 nt	100	51	M94081|TRAJ18*01|Homo	44/44 nt	100	44	CAASINRGSTLGRLYF	TRA
TCGA-D8-A13Z	Primary Tumor	HWUSI-EAS227_109445579:7:111:16334:19849	AE000660|TRAV25*01|Homo	54/54 nt	100	54	M94081|TRAJ42*01|Homo	40/40 nt	100	40	CAGPEGGSQGNLIF	TRA
TCGA-D8-A13Z	Primary Tumor	HWUSI-EAS227_109445579:7:20:13262:9990	AE000660|TRAV25*01|Homo	54/54 nt	100	54	M94081|TRAJ42*01|Homo	40/40 nt	100	40	CAGPEGGSQGNLIF	TRA
TCGA-D8-A13Z	Primary Tumor	HWUSI-EAS227_109445579:7:31:16935:8838	AE000661|TRAV39*01|Homo	58/58 nt	100	58	M94081|TRAJ41*01|Homo	36/36 nt	100	36	CAVGVPNSGYALNF	TRA
TCGA-D8-A13Z	Primary Tumor	HWUSI-EAS227_109445579:7:108:9150:19291	AE000661|TRAV41*01|Homo	34/34 nt	100	34	M94081|TRAJ49*01|Homo	49/49 nt	100	49	CAVSGGNQFYF	TRA
TCGA-D8-A13Z	Primary Tumor	HWUSI-EAS227_109445579:8:60:14575:3291	Y10410|TRAV6*05|Homo	34/34 nt	100	34	M35620|TRAJ40*01|Homo	61/61 nt	100	61	CAPTTSGTYKYIF	TRA
TCGA-D8-A13Z	Primary Tumor	HWUSI-EAS227_109445579:8:48:8504:9327	AE000659|TRAV16*01|Homo	39/42 nt	92.8571	39	M94081|TRAJ33*01|Homo	57/57 nt	100	57	CSYMDSNYQLIW	TRA
TCGA-D8-A13Z	Primary Tumor	HWUSI-EAS227_109445579:7:102:18835:2907	X04954|TRAV13-1*02|Homo	23/23 nt	100	23	M94081|TRAJ30*01|Homo	46/46 nt	100	46	CDKIIF	TRA
TCGA-D8-A13Z	Primary Tumor	HWUSI-EAS227_109445579:7:18:17527:14809	AE000659|TRAV9-2*01|Homo	28/28 nt	100	28	X02884|TRAJ3*01|Homo	59/59 nt	100	59	CALYSSASKIIF	TRA
TCGA-D8-A13Z	Primary Tumor	HWUSI-EAS227_109445579:8:44:14722:7709	AE000659|TRAV9-2*01|Homo	28/28 nt	100	28	X02884|TRAJ3*01|Homo	59/59 nt	100	59	CALYSSASKIIF	TRA
TCGA-BH-A18G	Primary Tumor	HWI-ST512_109974455:3:27:6303:106315	AE000660|TRAV29/DV5*01|Homo	45/45 nt	100	45	X05773|TRAJ17*01|Homo	52/52 nt	100	52	CAASGEAAGNKLTF	TRA
TCGA-JL-A3YX	Primary Tumor	HWI-ST495:137338861:C1V14ACXX:6:2310:17772:19970	M17657|TRAV12-1*02|Homo	58/58 nt	100	58	M94081|TRAJ8*01|Homo	27/27 nt	100	27	CAIRRFQKLVF	TRA
TCGA-A8-A06P	Primary Tumor	HWI-EAS231_104611693:8:43:1444:11465	AE000659|TRAV16*01|Homo	19/21 nt	90.4762	19	M94081|TRAJ43*01|Homo	53/54 nt	98.1481	53	CDTNNDMRF	TRA
TCGA-D8-A1JF	Primary Tumor	HWI-ST495_114207489:7:1201:4643:63200	AE000659|TRAV9-2*01|Homo	45/45 nt	100	45	M35620|TRAJ40*01|Homo	50/50 nt	100	50	CALGDTSGTYKYIF	TRA
TCGA-D8-A1JF	Primary Tumor	HWI-ST495_114207489:7:1206:18411:139672	AE000659|TRAV8-1*01|Homo	33/33 nt	100	33	M94081|TRAJ37*01|Homo	62/62 nt	100	62	CRGSGNTGKLIF	TRA
TCGA-E9-A3QA	Primary Tumor	HWI-ST466:137456800:C20VRACXX:6:2213:15049:63400	AE000658|TRAV3*01|Homo	51/51 nt	100	51	AJ007774|TRAJ37*02|Homo	40/40 nt	100	40	CAVRASSSNTGKLIF	TRA
TCGA-E9-A3QA	Primary Tumor	HWI-ST466:137456800:C20VRACXX:6:2213:15049:63400	AE000658|TRAV3*01|Homo	51/51 nt	100	51	AJ007774|TRAJ37*02|Homo	39/39 nt	100	39	CAVRASSSNTGKLIF	TRA
TCGA-E9-A3QA	Primary Tumor	HWI-ST466:137456800:C20VRACXX:6:2112:12330:64369	AE000659|TRAV8-3*01|Homo	71/71 nt	100	71	M94081|TRAJ45*01|Homo	26/27 nt	96.2963	26	CAVGAPGGGADGLTF	TRA
TCGA-E9-A3QA	Primary Tumor	HWI-ST466:137456800:C20VRACXX:6:2211:20339:93472	M17656|TRAV12-3*02|Homo	49/49 nt	100	49	X05773|TRAJ17*01|Homo	43/43 nt	100	43	CAMKEGKAAGNKLTF	TRA
TCGA-E9-A3QA	Primary Tumor	HWI-ST466:137456800:C20VRACXX:6:2316:8469:74016	M17656|TRAV12-3*02|Homo	49/49 nt	100	49	X05773|TRAJ17*01|Homo	43/43 nt	100	43	CAMKEGKAAGNKLTF	TRA
TCGA-E9-A3QA	Primary Tumor	HWI-ST466:137456800:C20VRACXX:6:2214:3660:8499	AE000660|TRAV26-1*01|Homo	63/65 nt	96.9231	63	M94081|TRAJ15*02|Homo	31/31 nt	100	31	CIVRVPNQAGTALIF	TRA
TCGA-E9-A3QA	Primary Tumor	HWI-ST466:137456800:C20VRACXX:5:1307:19308:51911	AE000659|TRAV16*01|Homo	34/34 nt	100	34	M94081|TRAJ45*01|Homo	53/54 nt	98.1481	53	CALGGLGGGADGLTF	TRA
TCGA-E9-A3QA	Primary Tumor	HWI-ST466:137456800:C20VRACXX:5:2313:14010:6957	AE000659|TRAV16*01|Homo	34/34 nt	100	34	M94081|TRAJ45*01|Homo	56/56 nt	100	56	CALGGLGGGADGLTF	TRA
TCGA-E9-A3QA	Primary Tumor	HWI-ST466:137456800:C20VRACXX:6:2205:8394:35603	AE000659|TRAV16*01|Homo	34/34 nt	100	34	M94081|TRAJ45*01|Homo	56/56 nt	100	56	CALGGLGGGADGLTF	TRA
TCGA-E9-A3QA	Primary Tumor	HWI-ST466:137456800:C20VRACXX:5:2207:20458:8287	AE000660|TRAV26-1*01|Homo	40/40 nt	100	40	M35619|TRAJ44*01|Homo	50/51 nt	98.0392	50	CCVLLHRQITPYTGTASKLTF	TRA
TCGA-B6-A0WX	Primary Tumor	HWI-EAS110_108264206:3:15:4196:9810	AE000659|TRAV6*01|Homo	65/65 nt	100	65	AF532854|TRAJ32*02|Homo	29/29 nt	100	29	CALHPGGATNKLIF	TRA
TCGA-B6-A0WX	Primary Tumor	HWI-EAS110_108264206:3:84:9085:15867	AE000659|TRAV6*01|Homo	65/65 nt	100	65	AF532854|TRAJ32*02|Homo	29/29 nt	100	29	CALHPGGATNKLIF	TRA
TCGA-B6-A0WX	Primary Tumor	HWI-EAS110_108264206:4:22:5983:16058	AE000659|TRAV9-1*01|Homo	60/60 nt	100	60	M94081|TRAJ36*01|Homo	39/39 nt	100	39	CALSGTGANNLFF	TRA
TCGA-B6-A0WX	Primary Tumor	HWI-EAS110_108264206:3:25:17074:14389	X04957|TRAV27*02|Homo	52/53 nt	98.1132	52	M94081|TRAJ45*01|Homo	41/42 nt	97.619	41	CALVYSGGGADGLPF	TRA
TCGA-B6-A0WX	Primary Tumor	HWI-EAS110_108264206:4:119:10194:14965	AE000661|TRAV38-1*01|Homo	24/24 nt	100	24	M94081|TRAJ45*01|Homo	62/62 nt	100	62	CAFMIFSGGGADGLTF	TRA
TCGA-E9-A1R2	Primary Tumor	HWI-ST729_114206772:7:2108:13575:130899	AE000659|TRAV12-3*01|Homo	65/65 nt	100	65	M94081|TRAJ11*01|Homo	28/30 nt	93.3333	28	CAMRTTGYSNLTF	TRA
TCGA-E9-A1R2	Primary Tumor	HWI-ST729_114206772:8:1105:2721:170226	AE000659|TRAV8-3*01|Homo	26/26 nt	100	26	M94081|TRAJ20*01|Homo	54/54 nt	100	54	CAVGSPNDYKLSF	TRA
TCGA-EW-A1P4	Primary Tumor	HWI-ST474_116588994:6:2203:9450:6469	AE000658|TRAV1-1*01|Homo	64/64 nt	100	64	M94081|TRAJ13*01|Homo	26/26 nt	100	26	CAVRVFSSSGGYQKVTF	TRA
TCGA-EW-A1P4	Primary Tumor	HWI-ST514_115489139:3:2201:1917:114357	AE000658|TRAV1-1*01|Homo	64/64 nt	100	64	M94081|TRAJ13*01|Homo	26/26 nt	100	26	CAVRVFSSSGGYQKVTF	TRA
TCGA-EW-A1P4	Primary Tumor	HWI-ST474_116588994:6:2207:17540:76508	AE000658|TRAV2*01|Homo	69/70 nt	98.5714	69	M94081|TRAJ30*01|Homo	32/32 nt	100	32	CAVGRDDKIIF	TRA
TCGA-EW-A1P4	Primary Tumor	HWI-ST514_115489139:4:2108:1914:78689	AE000658|TRAV2*01|Homo	69/70 nt	98.5714	69	M94081|TRAJ30*01|Homo	32/32 nt	100	32	CAVGRDDKIIF	TRA
TCGA-EW-A1P4	Primary Tumor	HWI-ST514_115489139:5:1107:14226:74424	AE000658|TRAV2*01|Homo	69/70 nt	98.5714	69	M94081|TRAJ30*01|Homo	32/32 nt	100	32	CAVGRDDKIIF	TRA
TCGA-EW-A1P4	Primary Tumor	HWI-ST514_115489139:5:2107:14080:80355	AE000658|TRAV2*01|Homo	69/70 nt	98.5714	69	M94081|TRAJ30*01|Homo	32/32 nt	100	32	CAVGRDDKIIF	TRA
TCGA-EW-A1P4	Primary Tumor	HWI-ST474_116588994:6:2104:17215:140935	AE000659|TRAV8-1*01|Homo	49/49 nt	100	49	X02884|TRAJ3*01|Homo	43/43 nt	100	43	CAVNAPTGSASKIIF	TRA
TCGA-EW-A1P4	Primary Tumor	HWI-ST514_115489139:3:2108:9197:47699	AE000659|TRAV8-1*01|Homo	49/49 nt	100	49	X02884|TRAJ3*01|Homo	43/43 nt	100	43	CAVNAPTGSASKIIF	TRA
TCGA-EW-A1P4	Primary Tumor	HWI-ST474_116588994:6:2201:17529:185448	AE000658|TRAV3*01|Homo	38/38 nt	100	38	M94081|TRAJ29*01|Homo	58/58 nt	100	58	CAVRDLRNSGNTPLVF	TRA
TCGA-EW-A1P4	Primary Tumor	HWI-ST474_116588994:6:1202:5912:179582	AE000658|TRAV3*01|Homo	38/38 nt	100	38	M94081|TRAJ29*01|Homo	58/58 nt	100	58	CAVRDLRNSGNTPLVF	TRA
TCGA-EW-A1P4	Primary Tumor	HWI-ST474_116588994:6:2302:3633:16983	AE000658|TRAV3*01|Homo	38/38 nt	100	38	M94081|TRAJ29*01|Homo	58/58 nt	100	58	CAVRDLRNSGNTPLVF	TRA
TCGA-C8-A1HG	Primary Tumor	HWI-ST144_110064598:1:27:7585:120032#0	AE000659|TRAV8-3*01|Homo	64/65 nt	98.4615	64	M94081|TRAJ30*01|Homo	32/32 nt	100	32	CAVGAGRDDKIIF	TRA
TCGA-C8-A1HG	Primary Tumor	HWI-ST144_110064598:1:4:12339:71598#0	AE000659|TRAV16*01|Homo	51/51 nt	100	51	AJ007774|TRAJ37*02|Homo	43/43 nt	100	43	CAPVGSSNTGKLIF	TRA
TCGA-C8-A1HG	Primary Tumor	HWI-ST144_110064598:1:68:16103:180028#0	AE000660|TRAV19*01|Homo	77/77 nt	100	77	M94081|TRAJ26*01|Homo	20/20 nt	100	20	CALSEGDNYGQNFVF	TRA
TCGA-C8-A1HG	Primary Tumor	HWI-ST144_110064598:1:63:2853:130117#0	AE000660|TRAV19*01|Homo	46/46 nt	100	46	M94081|TRAJ53*01|Homo	39/39 nt	100	39	CSEGASQGGSNYKLTF	TRA
TCGA-C8-A1HG	Primary Tumor	HWI-ST144_110064598:1:61:2785:45299#0	M17660|TRAV23/DV6*02|Homo	79/79 nt	100	79	M35622|TRAJ34*01|Homo	19/19 nt	100	19	CAARDTDKLIF	TRA
TCGA-C8-A1HG	Primary Tumor	HWI-ST144_110064598:1:22:19200:84511#0	AE000660|TRAV29/DV5*01|Homo	58/59 nt	98.3051	58	M94081|TRAJ39*01|Homo	35/35 nt	100	35	CSVLLCSNPNAGNMLTF	TRA
TCGA-C8-A1HG	Primary Tumor	HWI-ST144_110064598:1:41:4479:43299#0	AE000659|TRAV6*01|Homo	27/27 nt	100	27	M94081|TRAJ42*01|Homo	57/57 nt	100	57	CALRRGSQGNLIF	TRA
TCGA-C8-A1HG	Primary Tumor	HWI-ST144_110064598:1:6:17023:107738#0	AE000658|TRAV3*01|Homo	35/36 nt	97.2222	35	M94081|TRAJ38*01|Homo	62/62 nt	100	62	CAVRDVNAGNNRKLIW	TRA
TCGA-C8-A1HG	Primary Tumor	HWI-ST144_110064598:1:67:2138:176232#0	AE000660|TRAV25*01|Homo	49/51 nt	96.0784	49	M35622|TRAJ34*01|Homo	46/46 nt	100	46	CAWPYNTDKLIF	TRA
TCGA-C8-A1HG	Primary Tumor	HWI-ST144_110064598:1:61:2785:45299#0	AE000660|TRAV23/DV6*01|Homo	31/31 nt	100	31	M35622|TRAJ34*01|Homo	51/51 nt	100	51	CAARDTDKLIF	TRA
TCGA-C8-A1HG	Primary Tumor	HWI-ST144_110064598:1:24:5999:176532#0	AE000660|TRAV25*01|Homo	43/44 nt	97.7273	43	M14905|TRAJ31*01|Homo	53/53 nt	100	53	CAGRNNNARLMF	TRA
TCGA-C8-A1HG	Primary Tumor	HWI-ST144_110064598:1:27:12874:184330#0	AE000658|TRAV3*01|Homo	48/49 nt	97.9592	48	M14905|TRAJ31*01|Homo	46/46 nt	100	46	CDRLRFVLLCCETPNNARLMF	TRA
TCGA-C8-A1HG	Primary Tumor	HWI-ST144_110064598:1:21:7649:161760#0	AE000661|TRAV38-1*01|Homo	25/25 nt	100	25	M94081|TRAJ30*01|Homo	49/49 nt	100	49	CAFMKGRDDKIIF	TRA
TCGA-C8-A1HG	Primary Tumor	HWI-ST144_110064598:1:4:17776:94631#0	AE000659|TRAV14/DV4*02|Homo	24/24 nt	100	24	X02886|TRAJ22*01|Homo	63/63 nt	100	63	CNETPISSGSARQLTF	TRA
TCGA-A2-A0D4	Primary Tumor	HWUSI-EAS1554_104314628:6:40:11500:11538	AE000658|TRAV1-2*01|Homo	66/67 nt	98.5075	66	X02885|TRAJ12*01|Homo	36/36 nt	100	36	CAGMDSSYKLIF	TRA
TCGA-AC-A2BM	Primary Tumor	HWI-ST495:137338861:C1V14ACXX:7:2106:17513:37298	AE000658|TRAV4*01|Homo	49/49 nt	100	49	AJ007774|TRAJ37*02|Homo	46/46 nt	100	46	CLVGDMRGSSNTGKLIF	TRA
TCGA-AC-A2BM	Primary Tumor	HWI-ST648:140907090:D25FTACXX:5:1115:17927:60041	AE000660|TRAV20*01|Homo	57/57 nt	100	57	M94081|TRAJ52*01|Homo	42/42 nt	100	42	CAVHNAGGTSYGKLTF	TRA
TCGA-AC-A2BM	Primary Tumor	HWI-ST648:140907090:D25FTACXX:5:1303:16279:56480	AE000660|TRAV22*01|Homo	59/59 nt	100	59	M16747|TRAJ6*01|Homo	41/41 nt	100	41	CAVSGGSYIPTF	TRA
TCGA-E2-A15O	Primary Tumor	HWI-EAS324_109434723:8:11:16684:12066	M17659|TRAV2*02|Homo	67/69 nt	97.1014	67	M94081|TRAJ38*01|Homo	30/30 nt	100	30	CAAGNNRKLIW	TRA
TCGA-E2-A15O	Primary Tumor	HWI-EAS324_109434723:8:87:7130:2735	AE000659|TRAV9-2*01|Homo	69/69 nt	100	69	M94081|TRAJ38*01|Homo	28/29 nt	96.5517	28	CALRHAGNNSKLIW	TRA
TCGA-E2-A15O	Primary Tumor	HWI-EAS324_109434723:7:27:4483:8875	AE000659|TRAV9-2*01|Homo	52/52 nt	100	52	M94081|TRAJ29*01|Homo	45/45 nt	100	45	CALTRNSGNTPLVF	TRA
TCGA-E2-A15O	Primary Tumor	HWI-EAS324_109434723:7:22:3065:18315	AE000660|TRAV19*01|Homo	81/81 nt	100	81	M35620|TRAJ40*01|Homo	20/20 nt	100	20	CALSTSGTYKYIF	TRA
TCGA-E2-A15O	Primary Tumor	HWI-EAS324_109434723:7:97:8914:18281	AE000661|TRAV38-2/DV8*01|Homo	52/52 nt	100	52	M94081|TRAJ43*01|Homo	44/44 nt	100	44	CAYRSAANDMRF	TRA
TCGA-E2-A15O	Primary Tumor	HWI-EAS324_109434723:8:26:12074:6853	M17657|TRAV12-1*02|Homo	32/32 nt	100	32	M35620|TRAJ40*01|Homo	58/58 nt	100	58	CVVITSGTYKYIF	TRA
TCGA-E2-A15O	Primary Tumor	HWI-EAS324_109434723:7:77:17503:8457	AE000659|TRAV13-2*01|Homo	25/25 nt	100	25	M94081|TRAJ39*01|Homo	58/58 nt	100	58	CAENNAGNMLTF	TRA
TCGA-E2-A15O	Primary Tumor	HWI-EAS324_109434723:7:77:17519:8446	AE000659|TRAV13-2*01|Homo	25/25 nt	100	25	M94081|TRAJ39*01|Homo	58/58 nt	100	58	CAENNAGNMLTF	TRA
TCGA-E2-A15O	Primary Tumor	HWI-EAS324_109434723:8:113:19260:5900	AE000660|TRAV17*01|Homo	31/31 nt	100	31	M94081|TRAJ32*01|Homo	59/59 nt	100	59	CFLLLCYGRCGGATNKLIF	TRA
TCGA-E2-A15O	Primary Tumor	HWI-EAS324_109434723:8:73:6035:17396	M12959|TRAV8-4*04|Homo	45/45 nt	100	45	M94081|TRAJ28*01|Homo	48/48 nt	100	48	CAVSELPGAGSYQLTF	TRA
TCGA-E2-A15O	Primary Tumor	HWI-EAS324_109434723:7:58:15911:6030	AE000659|TRAV9-2*01|Homo	41/41 nt	100	41	M94081|TRAJ20*01|Homo	52/52 nt	100	52	CALSDQNDYKLSF	TRA
TCGA-C8-A134	Primary Tumor	HWI-ST434_109457553:4:1:18002:198717	AE000658|TRAV1-2*01|Homo	81/83 nt	97.5904	81	M94081|TRAJ33*01|Homo	22/22 nt	100	22	CAVDSNYQLIW	TRA
TCGA-C8-A134	Primary Tumor	HWI-ST434_109457553:4:25:5073:125126	AE000658|TRAV1-2*01|Homo	81/83 nt	97.5904	81	M94081|TRAJ33*01|Homo	22/22 nt	100	22	CAVDSNYQLIW	TRA
TCGA-C8-A134	Primary Tumor	HWI-ST434_109457553:4:6:1705:111313	AE000658|TRAV1-2*01|Homo	57/59 nt	96.6102	57	M94081|TRAJ42*01|Homo	40/40 nt	100	40	CAVGGGSQGNLIF	TRA
TCGA-C8-A134	Primary Tumor	HWI-ST434_109457553:4:8:4106:4412	AE000659|TRAV6*01|Homo	68/68 nt	100	68	M94081|TRAJ42*01|Homo	28/28 nt	100	28	CALETGSQGNLIF	TRA
TCGA-C8-A134	Primary Tumor	HWI-ST434_109457553:4:66:2982:178905	AE000659|TRAV10*01|Homo	56/56 nt	100	56	M94081|TRAJ33*01|Homo	42/42 nt	100	42	CVVSPDSNYQLIW	TRA
TCGA-C8-A134	Primary Tumor	HWI-ST434_109457553:4:3:8508:25435	AE000659|TRAV8-3*01|Homo	66/66 nt	100	66	M35620|TRAJ40*01|Homo	32/32 nt	100	32	CAVGPTSGTYKYIF	TRA
TCGA-C8-A134	Primary Tumor	HWI-ST434_109457553:4:24:13561:45601	M35617|TRAV8-3*02|Homo	55/55 nt	100	55	M94081|TRAJ48*01|Homo	38/38 nt	100	38	CAVVMDFGNEKLTF	TRA
TCGA-C8-A134	Primary Tumor	HWI-ST434_109457553:4:61:20286:154772	X04954|TRAV13-1*02|Homo	64/64 nt	100	64	X02884|TRAJ3*01|Homo	28/28 nt	100	28	CAATLGSSASKIIF	TRA
TCGA-C8-A134	Primary Tumor	HWI-ST434_109457553:4:21:16926:38111	X63455|TRAV8-4*05|Homo	51/51 nt	100	51	X05775|TRAJ15*01|Homo	50/50 nt	100	50	CAVNQAGTALIF	TRA
TCGA-C8-A134	Primary Tumor	HWI-ST434_109457553:4:43:15516:188832	AE000660|TRAV17*01|Homo	54/54 nt	100	54	M94081|TRAJ36*01|Homo	40/40 nt	100	40	CATLYQTGANNLFF	TRA
TCGA-C8-A134	Primary Tumor	HWI-ST434_109457553:4:43:15526:188848	AE000660|TRAV17*01|Homo	54/54 nt	100	54	M94081|TRAJ36*01|Homo	39/40 nt	97.5	39	CATLYQTGANNLFF	TRA
TCGA-C8-A134	Primary Tumor	HWI-ST434_109457553:4:7:21358:81092	AE000660|TRAV26-2*01|Homo	62/62 nt	100	62	M94081|TRAJ37*01|Homo	33/33 nt	100	33	CILRDGYSGNTGKLIF	TRA
TCGA-C8-A134	Primary Tumor	HWI-ST434_109457553:4:47:20143:200140	AE000660|TRAV26-2*01|Homo	62/62 nt	100	62	M94081|TRAJ37*01|Homo	33/33 nt	100	33	CILRDGYSGNTGKLIF	TRA
TCGA-C8-A134	Primary Tumor	HWI-ST434_109457553:4:61:16087:101290	AE000660|TRAV26-1*01|Homo	39/40 nt	97.5	39	M94081|TRAJ49*01|Homo	47/48 nt	97.9167	47	CCVLLHRQNRNQFYF	TRA
TCGA-C8-A134	Primary Tumor	HWI-ST434_109457553:4:43:10538:125311	AE000661|TRAV38-1*01|Homo	41/41 nt	100	41	M94081|TRAJ43*01|Homo	49/49 nt	100	49	CAFMITKNNDMRF	TRA
TCGA-C8-A134	Primary Tumor	HWI-ST434_109457553:4:65:1389:36273	X04954|TRAV13-1*02|Homo	33/34 nt	97.0588	33	M94081|TRAJ41*01|Homo	62/62 nt	100	62	CAANSNSGYALNF	TRA
TCGA-C8-A134	Primary Tumor	HWI-ST434_109457553:4:66:5197:100181	AE000660|TRAV36/DV7*01|Homo	20/20 nt	100	20	M94081|TRAJ38*01|Homo	60/60 nt	100	60	CVLTLYAGNNRKLIW	TRA
TCGA-C8-A134	Primary Tumor	HWI-ST434_109457553:4:68:5976:111922	AE000660|TRAV27*01|Homo	31/31 nt	100	31	M94081|TRAJ37*01|Homo	59/60 nt	98.3333	59	CAGAIRSGNTGKLIF	TRA
TCGA-C8-A134	Primary Tumor	HWI-ST434_109457553:4:66:20125:142974	AE000660|TRAV35*01|Homo	31/31 nt	100	31	M94081|TRAJ30*01|Homo	53/53 nt	100	53	CAGLSRDDKIIF	TRA
TCGA-C8-A134	Primary Tumor	HWI-ST434_109457553:4:65:18098:154182	AE000661|TRAV39*01|Homo	40/42 nt	95.2381	40	X02886|TRAJ22*01|Homo	55/55 nt	100	55	CIASLPPTSVPWTKGSARQLTF	TRA
TCGA-C8-A134	Primary Tumor	HWI-ST434_109457553:4:41:17441:169767	AE000658|TRAV1-2*01|Homo	32/32 nt	100	32	M94081|TRAJ20*01|Homo	50/50 nt	100	50	CAVTDYKLSF	TRA
TCGA-C8-A134	Primary Tumor	HWI-ST434_109457553:4:7:4333:199745	AE000659|TRAV8-3*01|Homo	19/19 nt	100	19	M94081|TRAJ10*01|Homo	60/60 nt	100	60	CAVGAFTGGGNKLTF	TRA
TCGA-C8-A134	Primary Tumor	HWI-ST434_109457553:4:3:15848:11568	AE000659|TRAV8-3*01|Homo	41/41 nt	100	41	M94081|TRAJ10*01|Homo	55/55 nt	100	55	CAVGAGTGGGNKLTF	TRA
TCGA-C8-A134	Primary Tumor	HWI-ST434_109457553:4:66:14673:195768	AE000659|TRAV8-3*01|Homo	41/41 nt	100	41	M94081|TRAJ10*01|Homo	55/55 nt	100	55	CAVGAGTGGGNKLTF	TRA
TCGA-C8-A134	Primary Tumor	HWI-ST434_109457553:4:68:8188:60161	AE000659|TRAV8-3*01|Homo	41/41 nt	100	41	M94081|TRAJ10*01|Homo	55/55 nt	100	55	CAVGAGTGGGNKLTF	TRA
TCGA-C8-A134	Primary Tumor	HWI-ST434_109457553:4:7:10428:167924	X04946|TRAV12-2*03|Homo	22/22 nt	100	22	M94081|TRAJ5*01|Homo	54/54 nt	100	54	CAGHLAGRRALTF	TRA
TCGA-A1-A0SP	Primary Tumor	HWUSI-EAS709_107046299:8:113:16984:18714	AE000658|TRAV1-1*01|Homo	55/56 nt	98.2143	55	M94081|TRAJ36*01|Homo	44/44 nt	100	44	CAVSDQTGANNLFF	TRA
TCGA-A1-A0SP	Primary Tumor	HWUSI-EAS709_107046299:8:119:4747:11595	AE000659|TRAV9-2*01|Homo	62/62 nt	100	62	M94081|TRAJ45*01|Homo	34/34 nt	100	34	CALSDIGGADGLTF	TRA
TCGA-A1-A0SP	Primary Tumor	HWUSI-EAS709_107046299:7:6:4040:6203	AE000659|TRAV16*01|Homo	70/70 nt	100	70	M94081|TRAJ18*01|Homo	29/29 nt	100	29	CATDRGSTLGRLYF	TRA
TCGA-A1-A0SP	Primary Tumor	HWUSI-EAS709_107046299:7:102:1715:6148	AE000660|TRAV35*01|Homo	69/69 nt	100	69	M94081|TRAJ29*01|Homo	24/24 nt	100	24	CAGQTSRNSGNTPLVF	TRA
TCGA-A1-A0SP	Primary Tumor	HWUSI-EAS709_107046299:7:117:12429:14399	AE000659|TRAV13-1*01|Homo	40/40 nt	100	40	M94081|TRAJ45*01|Homo	57/57 nt	100	57	CAASGGGGADGLTF	TRA
TCGA-A1-A0SP	Primary Tumor	HWUSI-EAS709_107046299:7:65:8068:9739	AE000659|TRAV8-6*02|Homo	25/25 nt	100	25	M94081|TRAJ42*01|Homo	61/61 nt	100	61	CAAYGGSQGNLIF	TRA
TCGA-A1-A0SP	Primary Tumor	HWUSI-EAS709_107046299:8:29:19779:8084	AE000659|TRAV5*01|Homo	39/39 nt	100	39	M35620|TRAJ40*01|Homo	57/57 nt	100	57	CAESMASGTYKYIF	TRA
TCGA-A1-A0SP	Primary Tumor	HWUSI-EAS709_107046299:8:111:7057:3198	AE000659|TRAV5*01|Homo	39/39 nt	100	39	M35620|TRAJ40*01|Homo	57/57 nt	100	57	CAESMASGTYKYIF	TRA
TCGA-A1-A0SP	Primary Tumor	HWUSI-EAS709_107046299:8:17:4538:12374	M97704|TRAV23/DV6*03|Homo	39/39 nt	100	39	X05775|TRAJ15*01|Homo	58/58 nt	100	58	CAASINQAGTALIF	TRA
TCGA-A1-A0SP	Primary Tumor	HWUSI-EAS709_107046299:8:79:11062:2074	M97704|TRAV23/DV6*03|Homo	39/39 nt	100	39	X05775|TRAJ15*01|Homo	58/58 nt	100	58	CAASINQAGTALIF	TRA
TCGA-AR-A5QQ	Primary Tumor	HWI-ST648:139457319:D256PACXX:8:1315:3217:27199	AE000658|TRAV3*01|Homo	74/75 nt	98.6667	74	M94081|TRAJ8*01|Homo	23/23 nt	100	23	CAMNTGFQKLVF	TRA
TCGA-AR-A5QQ	Primary Tumor	HWI-ST648:139457319:D256PACXX:7:1202:3500:31606	M21626|TRAV14/DV4*01|Homo	56/57 nt	98.2456	56	X05773|TRAJ17*01|Homo	45/45 nt	100	45	CAMRGIKAAGNKLTF	TRA
TCGA-AR-A5QQ	Primary Tumor	HWI-ST648:139457319:D256PACXX:8:1216:12644:17597	M27371|TRAV26-1*02|Homo	54/54 nt	100	54	M94081|TRAJ58*01|Homo	38/38 nt	100	38	CIVSGGTSGSRLTF	TRA
TCGA-AR-A5QQ	Primary Tumor	HWI-ST648:139457319:D256PACXX:8:2315:14792:53619	AE000659|TRAV8-6*02|Homo	26/26 nt	100	26	M94081|TRAJ52*01|Homo	68/68 nt	100	68	CAVNAGGTSYGKLTF	TRA
TCGA-BH-A0HP	Primary Tumor	HWUSI-EAS688_107046624:8:62:16923:16393	AE000660|TRAV19*01|Homo	64/64 nt	100	64	M94081|TRAJ49*01|Homo	23/23 nt	100	23	CALLGYLNTGNQFYF	TRA
TCGA-BH-A0HP	Primary Tumor	HWUSI-EAS688_107046624:8:62:16923:16393	AE000660|TRAV19*01|Homo	25/25 nt	100	25	M94081|TRAJ49*01|Homo	55/55 nt	100	55	CALLGYLNTGNQFYF	TRA
TCGA-A8-A07W	Primary Tumor	HWUSI-EAS635_104448450:8:115:6240:17876	AE000660|TRAV35*01|Homo	37/37 nt	100	37	M94081|TRAJ56*01|Homo	60/60 nt	100	60	CAGDTGANSKLTF	TRA
TCGA-A8-A07W	Primary Tumor	HWUSI-EAS635_104448450:7:13:19044:11164	S81645|TRAV29/DV5*02|Homo	30/30 nt	100	30	M35620|TRAJ40*01|Homo	60/60 nt	100	60	CSVLLCSPTSGTYKYIF	TRA
TCGA-A8-A07W	Primary Tumor	HWI-EAS289_104366375:7:7:4078:15909	M81774|TRAV12-2*02|Homo	40/40 nt	100	40	M16747|TRAJ6*01|Homo	58/58 nt	100	58	CAVPSGGSYIPTF	TRA
TCGA-B6-A0RM	Primary Tumor	HWUSI-EAS576_107674364:5:30:15049:12103	AE000660|TRAV27*01|Homo	58/59 nt	98.3051	58	M94081|TRAJ10*01|Homo	38/38 nt	100	38	CAGEVTGGGNKLTF	TRA
TCGA-B6-A0RM	Primary Tumor	HWUSI-EAS576_107674364:6:109:3190:2539	AE000660|TRAV27*01|Homo	58/59 nt	98.3051	58	M94081|TRAJ10*01|Homo	38/38 nt	100	38	CAGEVTGGGNKLTF	TRA
TCGA-HN-A2OB	Primary Tumor	HWI-ST474:138826102:D28YFACXX:4:2215:3930:15603	AE000659|TRAV8-3*01|Homo	63/63 nt	100	63	AJ007774|TRAJ37*02|Homo	35/35 nt	100	35	CAVGTSNTGKLIF	TRA
TCGA-HN-A2OB	Primary Tumor	HWI-ST474:138826102:D28YFACXX:4:2301:12474:13190	AE000659|TRAV8-3*01|Homo	63/63 nt	100	63	AJ007774|TRAJ37*02|Homo	35/35 nt	100	35	CAVGTSNTGKLIF	TRA
TCGA-AC-A3W6	Primary Tumor	HWI-ST446:137378071:C1T0PACXX:6:1211:9040:86408	AE000659|TRAV9-2*01|Homo	59/59 nt	100	59	M35622|TRAJ34*01|Homo	37/37 nt	100	37	CSEEDTDKLIF	TRA
TCGA-AC-A3W6	Primary Tumor	HWI-ST446:137378071:C1T0PACXX:6:2308:3641:59476	AE000659|TRAV9-2*01|Homo	59/59 nt	100	59	M35622|TRAJ34*01|Homo	37/37 nt	100	37	CSEEDTDKLIF	TRA
TCGA-AC-A3W6	Primary Tumor	HWI-ST446:137378071:C1T0PACXX:5:1113:16639:52577	AE000660|TRAV29/DV5*01|Homo	78/78 nt	100	78	M94081|TRAJ15*02|Homo	20/20 nt	100	20	CTSVQPNQAGTALIF	TRA
TCGA-AC-A3W6	Primary Tumor	HWI-ST446:137378071:C1T0PACXX:5:1106:5553:42673	AE000661|TRAV39*01|Homo	57/57 nt	100	57	M35619|TRAJ44*01|Homo	36/36 nt	100	36	CHLLLCPIPNTGTASKLTF	TRA
TCGA-AC-A3W6	Primary Tumor	HWI-ST446:137378071:C1T0PACXX:6:2314:1371:4962	AE000658|TRAV4*01|Homo	45/45 nt	100	45	M94081|TRAJ42*01|Homo	52/52 nt	100	52	CTTASWVTGGGSQGNLIF	TRA
TCGA-AC-A3W6	Primary Tumor	HWI-ST446:137378071:C1T0PACXX:6:1306:20091:46878	AE000659|TRAV12-3*01|Homo	26/26 nt	100	26	M35620|TRAJ40*01|Homo	57/57 nt	100	57	CAMSAPSGTYKYIF	TRA
TCGA-AC-A3W6	Primary Tumor	HWI-ST446:137378071:C1T0PACXX:5:2113:13632:6045	AE000659|TRAV8-2*01|Homo	35/35 nt	100	35	M94081|TRAJ20*01|Homo	55/55 nt	100	55	CVVSDPVSNDYKLSF	TRA
TCGA-AC-A3W6	Primary Tumor	HWI-ST446:137378071:C1T0PACXX:5:1113:16639:52577	AE000660|TRAV29/DV5*01|Homo	27/27 nt	100	27	X05775|TRAJ15*01|Homo	58/58 nt	100	58	CTSVQPNQAGTALIF	TRA
TCGA-AC-A3W6	Primary Tumor	HWI-ST446:137378071:C1T0PACXX:6:2314:6406:44681	AE000660|TRAV29/DV5*01|Homo	27/27 nt	100	27	X05775|TRAJ15*01|Homo	58/58 nt	100	58	CTSVQPNQAGTALIF	TRA
TCGA-AC-A3W6	Primary Tumor	HWI-ST446:137378071:C1T0PACXX:6:2115:1555:56890	AE000660|TRAV27*01|Homo	46/46 nt	100	46	X02885|TRAJ12*01|Homo	52/52 nt	100	52	CRRGMDSSYKLIF	TRA
TCGA-D8-A1XA	Primary Tumor	HWI-ST791_114212154:3:1208:18203:124894	AE000660|TRAV35*01|Homo	60/60 nt	100	60	M94081|TRAJ28*01|Homo	29/29 nt	100	29	CRHLLPPFAGAGSYQLTF	TRA
TCGA-D8-A1XA	Primary Tumor	HWI-ST791_114212154:4:1208:20267:48047	AE000660|TRAV35*01|Homo	60/60 nt	100	60	M94081|TRAJ28*01|Homo	29/29 nt	100	29	CRHLLPPFAGAGSYQLTF	TRA
TCGA-D8-A1XA	Primary Tumor	HWI-ST791_114212154:5:1107:1843:65072	AE000660|TRAV35*01|Homo	60/60 nt	100	60	M94081|TRAJ28*01|Homo	29/29 nt	100	29	CRHLLPPFAGAGSYQLTF	TRA
TCGA-D8-A147	Primary Tumor	HWUSI-EAS683_109459844:4:62:9901:19432	AE000658|TRAV1-1*01|Homo	80/81 nt	98.7654	80	M94081|TRAJ41*01|Homo	22/22 nt	100	22	CAVKNSNSGYALNF	TRA
TCGA-D8-A147	Primary Tumor	HWUSI-EAS683_109459844:3:117:7784:15159	AE000658|TRAV1-2*01|Homo	50/50 nt	100	50	M94081|TRAJ29*01|Homo	43/43 nt	100	43	CLLPLCCDGVGNTPLVF	TRA
TCGA-D8-A147	Primary Tumor	HWUSI-EAS683_109459844:3:75:9642:14167	AE000659|TRAV8-3*01|Homo	62/62 nt	100	62	M94081|TRAJ41*01|Homo	32/32 nt	100	32	CAVGGRNSGYALNF	TRA
TCGA-D8-A147	Primary Tumor	HWUSI-EAS683_109459844:3:18:6680:4507	AE000659|TRAV16*01|Homo	49/49 nt	100	49	M94081|TRAJ36*01|Homo	45/45 nt	100	45	CITVLPIGANNLFF	TRA
TCGA-D8-A147	Primary Tumor	HWUSI-EAS683_109459844:4:86:15515:12213	AE000660|TRAV17*01|Homo	51/51 nt	100	51	M94081|TRAJ27*01|Homo	45/45 nt	100	45	CATDAVTNAGKSTF	TRA
TCGA-D8-A147	Primary Tumor	HWUSI-EAS683_109459844:4:49:16008:2319	AE000660|TRAV26-2*01|Homo	78/78 nt	100	78	M35620|TRAJ40*01|Homo	20/20 nt	100	20	CILRGTSGTYKYIF	TRA
TCGA-D8-A147	Primary Tumor	HWUSI-EAS683_109459844:4:103:13669:20558	AE000660|TRAV34*01|Homo	76/76 nt	100	76	AF033825|TRAJ47*02|Homo	22/22 nt	100	22	CGALEYGNKLVF	TRA
TCGA-D8-A147	Primary Tumor	HWUSI-EAS683_109459844:3:75:9642:14167	AE000659|TRAV8-3*01|Homo	26/26 nt	100	26	M94081|TRAJ41*01|Homo	56/56 nt	100	56	CAVGGRNSGYALNF	TRA
TCGA-D8-A147	Primary Tumor	HWUSI-EAS683_109459844:4:30:14614:19524	AE000659|TRAV12-2*01|Homo	40/40 nt	100	40	M94081|TRAJ11*01|Homo	54/54 nt	100	54	CAVNRPMNSGYSTLTF	TRA
TCGA-D8-A147	Primary Tumor	HWUSI-EAS683_109459844:4:2:16710:4988	AE000660|TRAV27*01|Homo	19/19 nt	100	19	M94081|TRAJ10*01|Homo	61/61 nt	100	61	CAGALTGGGNKLTF	TRA
TCGA-D8-A147	Primary Tumor	HWUSI-EAS683_109459844:4:29:12204:5530	AE000658|TRAV3*01|Homo	22/22 nt	100	22	M94081|TRAJ4*01|Homo	62/62 nt	100	62	CAVSPFSGGYNKLIF	TRA
TCGA-D8-A147	Primary Tumor	HWUSI-EAS683_109459844:3:84:10151:10309	AE000658|TRAV4*01|Homo	22/23 nt	95.6522	22	X02884|TRAJ3*01|Homo	61/62 nt	98.3871	61	CLVGYSSASKIIF	TRA
TCGA-AO-A12A	Primary Tumor	HWUSI-EAS712_109446182:6:118:5463:13679#0	AE000659|TRAV8-4*01|Homo	67/67 nt	100	67	M94081|TRAJ48*01|Homo	29/29 nt	100	29	CCEYGFGNEKLTF	TRA
TCGA-AO-A12A	Primary Tumor	HWUSI-EAS712_109446182:5:1:8927:6786	AE000659|TRAV10*01|Homo	38/39 nt	97.4359	38	M94081|TRAJ47*01|Homo	51/51 nt	100	51	CICVVTAGREYGNKLVF	TRA
TCGA-AO-A12A	Primary Tumor	HWUSI-EAS712_109446182:5:97:1839:3459	AE000658|TRAV1-2*01|Homo	43/43 nt	100	43	M94081|TRAJ45*01|Homo	57/57 nt	100	57	CAVRSGGGADGLTF	TRA
TCGA-AO-A12A	Primary Tumor	HWUSI-EAS712_109446182:6:120:1638:19356#0	AE000659|TRAV9-2*01|Homo	32/32 nt	100	32	X02884|TRAJ3*01|Homo	62/62 nt	100	62	CSESPGYSSASKIIF	TRA
TCGA-AR-A1AJ	Primary Tumor	HWI-ST735_110636044:6:67:20539:28146	AE000658|TRAV1-1*01|Homo	70/70 nt	100	70	X02885|TRAJ12*01|Homo	24/24 nt	100	24	CAVGGDSSYKLIF	TRA
TCGA-AR-A1AJ	Primary Tumor	HWI-ST735_110636044:6:42:12394:85963	AE000658|TRAV1-2*01|Homo	72/72 nt	100	72	M94081|TRAJ4*01|Homo	25/25 nt	100	25	CLLPLCCYFSGGYNKLIF	TRA
TCGA-AR-A1AJ	Primary Tumor	HWI-ST735_110636044:6:7:8707:62468	AE000658|TRAV1-2*01|Homo	72/72 nt	100	72	M94081|TRAJ4*01|Homo	25/25 nt	100	25	CLLPLCCYFSGGYNKLIF	TRA
TCGA-AR-A1AJ	Primary Tumor	HWI-ST735_110636044:6:1:20297:94187	AE000658|TRAV1-2*01|Homo	64/64 nt	100	64	M94081|TRAJ29*01|Homo	32/32 nt	100	32	CAVLSGNTPLVF	TRA
TCGA-AR-A1AJ	Primary Tumor	HWI-ST735_110636044:6:66:8225:18877	AE000658|TRAV1-2*01|Homo	51/51 nt	100	51	M94081|TRAJ4*01|Homo	42/43 nt	97.6744	42	CAAVSYSGGYNKLIF	TRA
TCGA-AR-A1AJ	Primary Tumor	HWI-ST735_110636044:6:43:15993:133973	AE000658|TRAV1-2*01|Homo	49/49 nt	100	49	M94081|TRAJ20*01|Homo	48/48 nt	100	48	CAVSFDYKLSF	TRA
TCGA-AR-A1AJ	Primary Tumor	HWI-ST735_110636044:6:4:15970:20245	AE000658|TRAV2*01|Homo	66/66 nt	100	66	M94081|TRAJ8*01|Homo	28/28 nt	100	28	CAVEDQSFQKLVF	TRA
TCGA-AR-A1AJ	Primary Tumor	HWI-ST735_110636044:6:65:5830:124230	AE000658|TRAV2*01|Homo	66/66 nt	100	66	M94081|TRAJ8*01|Homo	28/28 nt	100	28	CAVEDQSFQKLVF	TRA
TCGA-AR-A1AJ	Primary Tumor	HWI-ST735_110636044:6:68:17476:61565	AE000658|TRAV3*01|Homo	60/60 nt	100	60	M94081|TRAJ7*01|Homo	33/33 nt	100	33	CCERHNPGNNRLAF	TRA
TCGA-AR-A1AJ	Primary Tumor	HWI-ST735_110636044:6:64:6273:14784	AE000658|TRAV3*01|Homo	60/60 nt	100	60	M94081|TRAJ7*01|Homo	33/33 nt	100	33	CCERHNPGNNRLAF	TRA
TCGA-AR-A1AJ	Primary Tumor	HWI-ST735_110636044:6:2:4472:87415	AE000658|TRAV3*01|Homo	53/53 nt	100	53	M94081|TRAJ45*01|Homo	39/39 nt	100	39	CCERRGRGGADGLTF	TRA
TCGA-AR-A1AJ	Primary Tumor	HWI-ST735_110636044:6:24:8981:115089	AE000659|TRAV10*01|Homo	57/57 nt	100	57	M14905|TRAJ31*01|Homo	29/29 nt	100	29	CVVSVPTVRARLMF	TRA
TCGA-AR-A1AJ	Primary Tumor	HWI-ST735_110636044:6:46:17105:149165	AE000659|TRAV8-3*01|Homo	64/65 nt	98.4615	64	M94081|TRAJ20*01|Homo	33/33 nt	100	33	CAVGAANDYKLSF	TRA
TCGA-AR-A1AJ	Primary Tumor	HWI-ST735_110636044:6:26:19662:102652	M21626|TRAV14/DV4*01|Homo	76/76 nt	100	76	M94081|TRAJ4*01|Homo	20/20 nt	100	20	CAMRDSFSGGYNKLIF	TRA
TCGA-AR-A1AJ	Primary Tumor	HWI-ST735_110636044:6:7:20546:128125	AE000659|TRAV8-6*02|Homo	52/52 nt	100	52	M94081|TRAJ5*01|Homo	40/40 nt	100	40	CAVSSPHTGRRALTF	TRA
TCGA-AR-A1AJ	Primary Tumor	HWI-ST735_110636044:6:65:6202:112922	AE000659|TRAV16*01|Homo	48/48 nt	100	48	M94081|TRAJ29*01|Homo	45/45 nt	100	45	CALISPNSGNTPLVF	TRA
TCGA-AR-A1AJ	Primary Tumor	HWI-ST735_110636044:6:42:9022:58802	AE000660|TRAV19*01|Homo	51/51 nt	100	51	M94081|TRAJ5*01|Homo	45/45 nt	100	45	CALSEEGTGRRALTF	TRA
TCGA-AR-A1AJ	Primary Tumor	HWI-ST735_110636044:6:42:11285:98788	AE000660|TRAV20*01|Homo	70/70 nt	100	70	AJ007774|TRAJ37*02|Homo	19/19 nt	100	19	CAVQVASNTGKLIF	TRA
TCGA-AR-A1AJ	Primary Tumor	HWI-ST735_110636044:6:67:11245:16629	AE000660|TRAV22*01|Homo	46/46 nt	100	46	M35620|TRAJ40*01|Homo	46/46 nt	100	46	CAVDPSSGTYKYIF	TRA
TCGA-AR-A1AJ	Primary Tumor	HWI-ST735_110636044:6:2:2169:10640	AE000660|TRAV26-1*01|Homo	64/66 nt	96.9697	64	M94081|TRAJ33*01|Homo	23/23 nt	100	23	CIVRVSRNYQLIW	TRA
TCGA-AR-A1AJ	Primary Tumor	HWI-ST735_110636044:6:7:8774:20754	AE000660|TRAV29/DV5*01|Homo	64/64 nt	100	64	M94081|TRAJ45*01|Homo	35/35 nt	100	35	CAARSGGGADGLTF	TRA
TCGA-AR-A1AJ	Primary Tumor	HWI-ST735_110636044:6:27:5070:49417	AE000660|TRAV29/DV5*01|Homo	63/64 nt	98.4375	63	M94081|TRAJ45*01|Homo	35/35 nt	100	35	CAARSGGGADGLTF	TRA
TCGA-AR-A1AJ	Primary Tumor	HWI-ST735_110636044:6:62:9593:8645	AE000661|TRAV38-2/DV8*01|Homo	60/60 nt	100	60	M94081|TRAJ54*01|Homo	36/36 nt	100	36	CAYRSEAGAQKLVF	TRA
TCGA-AR-A1AJ	Primary Tumor	HWI-ST735_110636044:6:45:18647:33193	AE000661|TRAV38-1*01|Homo	35/35 nt	100	35	M94081|TRAJ52*01|Homo	62/62 nt	100	62	CARNAGGTSYGKLTF	TRA
TCGA-AR-A1AJ	Primary Tumor	HWI-ST735_110636044:6:43:4948:9809	AE000659|TRAV12-1*01|Homo	27/27 nt	100	27	M94081|TRAJ49*01|Homo	52/52 nt	100	52	CVVTTITASTGNQFYF	TRA
TCGA-AR-A1AJ	Primary Tumor	HWI-ST735_110636044:6:65:4199:33706	AE000660|TRAV22*01|Homo	22/23 nt	95.6522	22	M35620|TRAJ40*01|Homo	57/57 nt	100	57	CAVDPSSGTYKYIF	TRA
TCGA-AR-A1AJ	Primary Tumor	HWI-ST735_110636044:6:62:10080:50752	AE000659|TRAV13-2*01|Homo	29/29 nt	100	29	M35620|TRAJ40*01|Homo	53/53 nt	100	53	CAETRGVEGTYKYIF	TRA
TCGA-AR-A1AJ	Primary Tumor	HWI-ST735_110636044:6:66:10877:19594	AE000660|TRAV26-2*01|Homo	25/25 nt	100	25	AJ007774|TRAJ37*02|Homo	61/61 nt	100	61	CILRGSSNTGKLIF	TRA
TCGA-AR-A1AJ	Primary Tumor	HWI-ST735_110636044:6:1:3732:2983	AE000658|TRAV3*01|Homo	34/34 nt	100	34	AJ007774|TRAJ37*02|Homo	56/56 nt	100	56	CCERHWGVSSNTGKLIF	TRA
TCGA-AR-A1AJ	Primary Tumor	HWI-ST735_110636044:6:67:11271:137208	AE000660|TRAV21*01|Homo	46/47 nt	97.8723	46	M94081|TRAJ36*01|Homo	52/52 nt	100	52	CAVKGGANNLFF	TRA
TCGA-AR-A1AJ	Primary Tumor	HWI-ST735_110636044:6:8:15672:145999	AE000660|TRAV21*01|Homo	46/47 nt	97.8723	46	M94081|TRAJ36*01|Homo	52/52 nt	100	52	CAVKGGANNLFF	TRA
TCGA-AR-A1AJ	Primary Tumor	HWI-ST735_110636044:6:8:21329:96930	AE000660|TRAV21*01|Homo	27/27 nt	100	27	M94081|TRAJ36*01|Homo	53/53 nt	100	53	CAVKGGANNLFF	TRA
TCGA-AR-A1AJ	Primary Tumor	HWI-ST735_110636044:6:3:20906:44479	X58747|TRAV6*02|Homo	45/45 nt	100	45	M94081|TRAJ33*01|Homo	49/49 nt	100	49	CRLSYLPLCCLMDSNYQLIW	TRA
TCGA-AR-A1AJ	Primary Tumor	HWI-ST735_110636044:6:7:6847:66026	X58747|TRAV6*02|Homo	45/45 nt	100	45	M94081|TRAJ33*01|Homo	49/49 nt	100	49	CRLSYLPLCCLMDSNYQLIW	TRA
TCGA-AR-A1AJ	Primary Tumor	HWI-ST735_110636044:6:41:14529:45872	AE000659|TRAV8-1*01|Homo	24/24 nt	100	24	M94081|TRAJ33*01|Homo	56/56 nt	100	56	CAVISGDSNYQLIW	TRA
TCGA-AR-A1AJ	Primary Tumor	HWI-ST735_110636044:6:64:16752:194372	AE000659|TRAV8-1*01|Homo	24/24 nt	100	24	M94081|TRAJ33*01|Homo	56/56 nt	100	56	CAVISGDSNYQLIW	TRA
TCGA-AR-A1AJ	Primary Tumor	HWI-ST735_110636044:6:42:15410:54251	M35617|TRAV8-3*02|Homo	45/46 nt	97.8261	45	AF532854|TRAJ32*02|Homo	48/48 nt	100	48	CAVSGGGATNKLIF	TRA
TCGA-AR-A1AJ	Primary Tumor	HWI-ST735_110636044:6:23:10036:53551	AE000660|TRAV17*01|Homo	38/38 nt	100	38	M14905|TRAJ31*01|Homo	56/56 nt	100	56	CATRNNNARLMF	TRA
TCGA-AR-A1AJ	Primary Tumor	HWI-ST735_110636044:6:25:7273:181682	AE000660|TRAV20*01|Homo	43/44 nt	97.7273	43	M94081|TRAJ29*01|Homo	50/50 nt	100	50	CRPGSGNTPLVF	TRA
TCGA-AR-A1AJ	Primary Tumor	HWI-ST735_110636044:6:1:8714:4469	AE000660|TRAV21*01|Homo	44/47 nt	93.617	44	M94081|TRAJ29*01|Homo	45/45 nt	100	45	CCTRGGNTPLVF	TRA
TCGA-AR-A1AJ	Primary Tumor	HWI-ST735_110636044:6:28:13052:125478	AE000658|TRAV1-1*01|Homo	25/25 nt	100	25	M94081|TRAJ27*01|Homo	52/52 nt	100	52	CAVRDANAGKSTF	TRA
TCGA-AR-A1AJ	Primary Tumor	HWI-ST735_110636044:6:62:20724:15323	M81774|TRAV12-2*02|Homo	31/31 nt	100	31	M94081|TRAJ24*02|Homo	47/50 nt	94	47	CAALGSWGKLQF	TRA
TCGA-AR-A1AJ	Primary Tumor	HWI-ST735_110636044:6:67:5515:125676	AE000659|TRAV13-1*01|Homo	47/47 nt	100	47	M94081|TRAJ23*01|Homo	50/50 nt	100	50	CAASSNQGGKLIF	TRA
TCGA-AR-A1AJ	Primary Tumor	HWI-ST735_110636044:6:7:6321:31332	S81645|TRAV29/DV5*02|Homo	31/31 nt	100	31	M94081|TRAJ21*01|Homo	55/55 nt	100	55	CAAGYNFNKFYF	TRA
TCGA-AR-A1AJ	Primary Tumor	HWI-ST735_110636044:6:63:1927:168881	AE000659|TRAV10*01|Homo	23/23 nt	100	23	M94081|TRAJ13*01|Homo	53/53 nt	100	53	CVVSAGYQKVTF	TRA
TCGA-AR-A1AJ	Primary Tumor	HWI-ST735_110636044:6:26:11511:91642	AE000659|TRAV5*01|Homo	29/29 nt	100	29	M94081|TRAJ10*01|Homo	57/57 nt	100	57	CAESRAGGGNKLTF	TRA
TCGA-AR-A1AJ	Primary Tumor	HWI-ST735_110636044:6:64:12907:36534	AE000658|TRAV2*01|Homo	23/23 nt	100	23	M94081|TRAJ5*01|Homo	55/55 nt	100	55	CAVEVPRVTGRRALTF	TRA
TCGA-AR-A1AJ	Primary Tumor	HWI-ST735_110636044:6:46:19490:151061	AE000659|TRAV6*01|Homo	29/29 nt	100	29	M94081|TRAJ4*01|Homo	61/61 nt	100	61	CAHGPFSGGYNKLIF	TRA
TCGA-AR-A1AJ	Primary Tumor	HWI-ST735_110636044:6:5:9993:185226	AE000659|TRAV6*01|Homo	29/29 nt	100	29	M94081|TRAJ4*01|Homo	61/61 nt	100	61	CAHGPFSGGYNKLIF	TRA
TCGA-E9-A3HO	Primary Tumor	HWI-ST485:137341042:D1WPGACXX:2:2202:12904:18592	AE000658|TRAV3*01|Homo	73/73 nt	100	73	M94081|TRAJ33*01|Homo	23/23 nt	100	23	CAVRAPDSNYQLIW	TRA
TCGA-A2-A4S0	Primary Tumor	HWI-ST720:137778353:C20VYACXX:1:1307:3245:56333	AE000658|TRAV4*01|Homo	50/50 nt	100	50	M16747|TRAJ6*01|Homo	47/47 nt	100	47	CLVGDDSGGSYIPTF	TRA
TCGA-A2-A4S0	Primary Tumor	HWI-ST720:137778353:C20VYACXX:1:1209:10965:34802	AE000659|TRAV8-2*01|Homo	50/50 nt	100	50	M94081|TRAJ42*01|Homo	46/46 nt	100	46	CVVSDSGSQGNLIF	TRA
TCGA-A8-A08C	Primary Tumor	HWUSI-EAS576_104297435:8:106:4752:16035	M17657|TRAV12-1*02|Homo	47/47 nt	100	47	M94081|TRAJ26*01|Homo	54/55 nt	98.1818	54	CVVNDGQNFVF	TRA
TCGA-AN-A0AJ	Primary Tumor	HWI-EAS289_104366375:5:86:16990:1621	AE000659|TRAV12-1*01|Homo	52/52 nt	100	52	M94081|TRAJ26*01|Homo	42/43 nt	97.6744	42	CVVRSYGQNFVF	TRA
TCGA-AN-A0AJ	Primary Tumor	HWI-EAS97_105965145:6:91:11850:13271	AE000659|TRAV12-2*01|Homo	49/49 nt	100	49	M94081|TRAJ9*01|Homo	42/43 nt	97.6744	42	CAVNGGGTGGFKTIF	TRA
TCGA-AN-A0AJ	Primary Tumor	HWUSI-EAS685_104436812:8:20:12626:8230	M27371|TRAV26-1*02|Homo	69/69 nt	100	69	M94081|TRAJ23*01|Homo	30/30 nt	100	30	CIVRGIYNQGGKLIF	TRA
TCGA-AN-A0AJ	Primary Tumor	HWUSI-EAS685_104436812:7:42:2596:18162	AE000660|TRAV35*01|Homo	49/49 nt	100	49	M94081|TRAJ30*01|Homo	43/43 nt	100	43	CAGQLPGNRDDKIIF	TRA
TCGA-AN-A0AJ	Primary Tumor	HWI-EAS97_105965145:6:52:4859:18030	AE000659|TRAV10*01|Homo	35/35 nt	100	35	M94081|TRAJ38*01|Homo	58/59 nt	98.3051	58	CVVGAGNNRKLIW	TRA
TCGA-AN-A0AJ	Primary Tumor	HWI-EAS97_105965145:6:89:11813:15819	AE000659|TRAV10*01|Homo	35/35 nt	100	35	M94081|TRAJ38*01|Homo	58/59 nt	98.3051	58	CVVGAGNNRKLIW	TRA
TCGA-AN-A0AJ	Primary Tumor	HWUSI-EAS685_104436812:8:34:6451:16306	AE000659|TRAV12-1*01|Homo	46/46 nt	100	46	AJ007774|TRAJ37*02|Homo	51/51 nt	100	51	CVVKSGSSNTGKLIF	TRA
TCGA-AN-A0AJ	Primary Tumor	HWUSI-EAS685_104436812:7:21:11062:1893	AE000660|TRAV22*01|Homo	44/44 nt	100	44	M14905|TRAJ31*01|Homo	52/52 nt	100	52	CAVNNARLMF	TRA
TCGA-AN-A0AJ	Primary Tumor	HWUSI-EAS685_104436812:7:21:11076:1878	AE000660|TRAV22*01|Homo	44/44 nt	100	44	M14905|TRAJ31*01|Homo	52/52 nt	100	52	CAVNNARLMF	TRA
TCGA-AN-A0AJ	Primary Tumor	HWUSI-EAS685_104436812:8:90:14889:13131	AE000659|TRAV13-2*01|Homo	24/24 nt	100	24	X05775|TRAJ15*01|Homo	55/55 nt	100	55	CAERGQAGTALIF	TRA
TCGA-A1-A0SF	Primary Tumor	HWI-ST151_115780258:5:2106:18832:65565	AE000660|TRAV22*01|Homo	27/27 nt	100	27	M94081|TRAJ45*01|Homo	64/64 nt	100	64	CAAYSGGGADGLTF	TRA
TCGA-A1-A0SF	Primary Tumor	HWI-ST151_115780258:5:2104:16618:37393	M97704|TRAV23/DV6*03|Homo	19/19 nt	100	19	M16747|TRAJ6*01|Homo	59/59 nt	100	59	CAASQSGGSYIPTF	TRA
TCGA-BH-A0W7	Primary Tumor	HWUSI-EAS1567_108914686:5:118:4967:14702#0	AE000658|TRAV3*01|Homo	74/75 nt	98.6667	74	M94081|TRAJ29*01|Homo	26/26 nt	100	26	CAVRVNSGNTPLVF	TRA
TCGA-BH-A0W7	Primary Tumor	HWUSI-EAS1567_108914686:5:115:6140:9697#0	AE000658|TRAV3*01|Homo	68/68 nt	100	68	M94081|TRAJ23*01|Homo	31/31 nt	100	31	CAVRDHNQGGKLIF	TRA
TCGA-BH-A0C0	Primary Tumor	ILLUMINA-63A70C_105583654:8:65:2376:2891#0	M12959|TRAV8-4*04|Homo	72/73 nt	98.6301	72	M35622|TRAJ34*01|Homo	21/21 nt	100	21	CAVTGTDKLIF	TRA
TCGA-BH-A0C0	Primary Tumor	HWUSI-EAS631_105608339:4:28:13079:17629#0	M12959|TRAV8-4*04|Homo	50/50 nt	100	50	M94081|TRAJ27*01|Homo	40/40 nt	100	40	CTNAGKSTF	TRA
TCGA-BH-A0C0	Primary Tumor	HWUSI-EAS631_105608339:4:6:2361:17606#0	AE000659|TRAV13-2*01|Homo	48/48 nt	100	48	M94081|TRAJ53*01|Homo	39/39 nt	100	39	CLLLCRDPPFASGGSNYKLTF	TRA
TCGA-BH-A0C0	Primary Tumor	ILLUMINA-63A70C_105583654:7:87:4948:19458#0	M21626|TRAV14/DV4*01|Homo	57/57 nt	100	57	M94081|TRAJ54*01|Homo	40/40 nt	100	40	CNERGGIQGAQKLVF	TRA
TCGA-BH-A0C0	Primary Tumor	HWUSI-EAS631_105608339:4:96:3791:18856#0	M17656|TRAV12-3*02|Homo	68/68 nt	100	68	M94081|TRAJ57*01|Homo	25/25 nt	100	25	CAMKWMGGSEKLVF	TRA
TCGA-BH-A0C0	Primary Tumor	HWUSI-EAS631_105608339:4:97:10778:19717#0	AE000659|TRAV8-6*02|Homo	58/59 nt	98.3051	58	M94081|TRAJ52*01|Homo	40/40 nt	100	40	CAVMGGTSYGKLTF	TRA
TCGA-BH-A0C0	Primary Tumor	ILLUMINA-63A70C_105583654:8:36:3625:9823#0	AE000659|TRAV16*01|Homo	57/57 nt	100	57	M94081|TRAJ26*01|Homo	40/40 nt	100	40	CITVLLNYGQNFVF	TRA
TCGA-BH-A0C0	Primary Tumor	ILLUMINA-63A70C_105583654:8:92:5309:11396#0	AE000660|TRAV26-2*01|Homo	60/61 nt	98.3607	60	M94081|TRAJ48*01|Homo	32/32 nt	100	32	CIPRDGAISNFGNEKLTF	TRA
TCGA-BH-A0C0	Primary Tumor	ILLUMINA-63A70C_105583654:8:116:9288:15216#0	AE000660|TRAV35*01|Homo	61/61 nt	100	61	AJ007774|TRAJ37*02|Homo	26/26 nt	100	26	CRHLLLCWAGGGASNTGKLIF	TRA
TCGA-BH-A0C0	Primary Tumor	ILLUMINA-63A70C_105583654:7:63:10998:5728#0	M21626|TRAV14/DV4*01|Homo	48/48 nt	100	48	M94081|TRAJ54*01|Homo	49/49 nt	100	49	CNERGGIQGAQKLVF	TRA
TCGA-BH-A0C0	Primary Tumor	HWUSI-EAS631_105608339:4:33:8302:11376#0	X58738|TRAV35*02|Homo	39/39 nt	100	39	M94081|TRAJ54*01|Homo	44/44 nt	100	44	CASSSFGGAQKLVF	TRA
TCGA-BH-A0C0	Primary Tumor	ILLUMINA-63A70C_105583654:8:71:16868:1275#0	AE000659|TRAV8-1*01|Homo	27/27 nt	100	27	M94081|TRAJ53*01|Homo	65/65 nt	100	65	CAVNANSGGSNYKLTF	TRA
TCGA-BH-A0C0	Primary Tumor	ILLUMINA-63A70C_105583654:8:71:10137:18515#0	AE000660|TRAV19*01|Homo	38/38 nt	100	38	M94081|TRAJ45*01|Homo	60/60 nt	100	60	CALSEAGGGADGLTF	TRA
TCGA-BH-A0C0	Primary Tumor	ILLUMINA-63A70C_105583654:7:113:6551:15901#0	S81645|TRAV29/DV5*02|Homo	20/20 nt	100	20	M94081|TRAJ43*01|Homo	51/51 nt	100	51	CAASYNNDMRF	TRA
TCGA-BH-A0C0	Primary Tumor	ILLUMINA-63A70C_105583654:8:75:8436:17201#0	AE000661|TRAV38-2/DV8*01|Homo	24/24 nt	100	24	M94081|TRAJ43*01|Homo	49/49 nt	100	49	CAYGLRNNDMRF	TRA
TCGA-BH-A0C0	Primary Tumor	HWUSI-EAS631_105608339:4:92:10294:8556#0	AE000658|TRAV3*01|Homo	27/27 nt	100	27	M35622|TRAJ34*01|Homo	52/52 nt	100	52	CAPRPGNTDKLIF	TRA
TCGA-BH-A0C0	Primary Tumor	ILLUMINA-63A70C_105583654:8:29:17907:8110#0	X63455|TRAV8-4*05|Homo	32/32 nt	100	32	M94081|TRAJ27*01|Homo	56/56 nt	100	56	CTNAGKSTF	TRA
TCGA-BH-A0C0	Primary Tumor	ILLUMINA-63A70C_105583654:8:69:17008:16066#0	X63455|TRAV8-4*05|Homo	32/32 nt	100	32	M94081|TRAJ27*01|Homo	56/56 nt	100	56	CTNAGKSTF	TRA
TCGA-BH-A0C0	Primary Tumor	ILLUMINA-63A70C_105583654:7:91:4462:9458#0	AE000659|TRAV8-1*01|Homo	25/25 nt	100	25	M94081|TRAJ26*01|Homo	54/54 nt	100	54	CRECDYGQNFVF	TRA
TCGA-BH-A0C0	Primary Tumor	HWUSI-EAS631_105608339:4:78:9006:13248#0	AE000660|TRAV26-1*01|Homo	23/23 nt	100	23	X02886|TRAJ22*01|Homo	63/63 nt	100	63	CIVRAGCLSSGSARQLTF	TRA
TCGA-BH-A0C0	Primary Tumor	ILLUMINA-63A70C_105583654:8:20:11692:20194#0	M12423|TRAV8-4*02|Homo	22/22 nt	100	22	X02885|TRAJ12*01|Homo	55/55 nt	100	55	CAVSGVDSSYKLIF	TRA
TCGA-BH-A0C0	Primary Tumor	HWUSI-EAS631_105608339:4:102:9142:13979#0	AE000659|TRAV6*01|Homo	37/37 nt	100	37	M94081|TRAJ9*01|Homo	55/55 nt	100	55	CAPSDTGGFKTIF	TRA
TCGA-BH-A0C0	Primary Tumor	HWUSI-EAS631_105608339:4:41:13847:14964#0	AE000659|TRAV6*01|Homo	37/37 nt	100	37	M94081|TRAJ9*01|Homo	55/55 nt	100	55	CAPSDTGGFKTIF	TRA
TCGA-BH-A0C0	Primary Tumor	HWUSI-EAS631_105608339:4:94:14729:13277#0	AE000659|TRAV6*01|Homo	36/36 nt	100	36	M94081|TRAJ9*01|Homo	55/55 nt	100	55	CAPSDTGGFKTIF	TRA
TCGA-B6-A0IH	Primary Tumor	HWI-ST434_109457553:6:68:15051:19911	AE000659|TRAV6*01|Homo	64/64 nt	100	64	M94081|TRAJ42*01|Homo	33/33 nt	100	33	CYGGSQGNLIF	TRA
TCGA-B6-A0IH	Primary Tumor	HWI-ST434_109457553:6:1:16945:121141	AE000659|TRAV6*01|Homo	56/59 nt	94.9153	56	M94081|TRAJ42*01|Homo	33/33 nt	100	33	CYGGSQGNLIF	TRA
TCGA-B6-A0IH	Primary Tumor	HWI-ST434_109457553:6:23:17038:184312	AE000660|TRAV17*01|Homo	49/49 nt	100	49	M94081|TRAJ36*01|Homo	44/44 nt	100	44	CATVRDQTGANNLFF	TRA
TCGA-B6-A0IH	Primary Tumor	HWI-ST434_109457553:6:67:2850:90002	AE000660|TRAV26-1*01|Homo	64/64 nt	100	64	M94081|TRAJ52*01|Homo	30/31 nt	96.7742	30	CIVRVAGAGGTSYGKLTF	TRA
TCGA-B6-A0IH	Primary Tumor	HWI-ST434_109457553:6:67:2850:90002	AE000660|TRAV26-1*01|Homo	45/45 nt	100	45	M94081|TRAJ52*01|Homo	51/51 nt	100	51	CIVRVAGAGGTSYGKLTF	TRA
TCGA-B6-A0IH	Primary Tumor	HWI-ST434_109457553:6:65:6310:197572	AE000660|TRAV26-1*01|Homo	45/45 nt	100	45	M94081|TRAJ52*01|Homo	51/51 nt	100	51	CIVRVAGAGGTSYGKLTF	TRA
TCGA-B6-A0IH	Primary Tumor	HWI-ST434_109457553:6:42:19678:109586	AE000660|TRAV26-1*01|Homo	45/45 nt	100	45	M94081|TRAJ52*01|Homo	51/51 nt	100	51	CIVRVAGAGGTSYGKLTF	TRA
TCGA-B6-A0IH	Primary Tumor	HWI-ST434_109457553:6:48:4579:78755	AE000660|TRAV26-1*01|Homo	45/45 nt	100	45	M94081|TRAJ52*01|Homo	51/51 nt	100	51	CIVRVAGAGGTSYGKLTF	TRA
TCGA-B6-A0IH	Primary Tumor	HWI-ST434_109457553:6:21:12290:116670	AE000660|TRAV20*01|Homo	29/30 nt	96.6667	29	M94081|TRAJ29*01|Homo	56/56 nt	100	56	CWASSGNTPLVF	TRA
TCGA-B6-A0IH	Primary Tumor	HWI-ST434_109457553:6:41:15098:82272	AE000660|TRAV20*01|Homo	29/30 nt	96.6667	29	M94081|TRAJ29*01|Homo	56/56 nt	100	56	CWASSGNTPLVF	TRA
TCGA-AN-A0AM	Primary Tumor	HWUSI-EAS574_105813918:3:7:19037:15135	AE000658|TRAV3*01|Homo	59/59 nt	100	59	M94081|TRAJ11*01|Homo	39/39 nt	100	39	CAVRDVSGYSTLTF	TRA
TCGA-AN-A0AM	Primary Tumor	HWUSI-EAS574_105813918:4:59:12038:15352	AE000659|TRAV12-2*01|Homo	66/66 nt	100	66	X05773|TRAJ17*01|Homo	27/27 nt	100	27	CATSMIKAAGNKLTF	TRA
TCGA-AN-A0AM	Primary Tumor	HWUSI-EAS574_105813918:3:59:7235:9376	AE000660|TRAV35*01|Homo	52/52 nt	100	52	M94081|TRAJ42*01|Homo	33/33 nt	100	33	CAGIPQRRGGSQGNLIF	TRA
TCGA-AN-A0AM	Primary Tumor	HWUSI-EAS574_105813918:4:6:5181:8322	AE000660|TRAV29/DV5*01|Homo	29/29 nt	100	29	M94081|TRAJ58*01|Homo	55/55 nt	100	55	CAAISETSGSRLTF	TRA
TCGA-AN-A0AM	Primary Tumor	HWUSI-EAS574_105813918:3:12:5691:2364	M17657|TRAV12-1*02|Homo	26/26 nt	100	26	M94081|TRAJ42*01|Homo	59/59 nt	100	59	CGPGGSQGNLIF	TRA
TCGA-AN-A0AM	Primary Tumor	HWUSI-EAS574_105813918:3:98:9101:1618	M17657|TRAV12-1*02|Homo	26/26 nt	100	26	M94081|TRAJ42*01|Homo	59/59 nt	100	59	CGPGGSQGNLIF	TRA
TCGA-AN-A0AM	Primary Tumor	HWUSI-EAS574_105813918:3:34:9492:9579	AE000660|TRAV21*01|Homo	26/26 nt	100	26	M94081|TRAJ37*01|Homo	62/62 nt	100	62	CCPAHGSGNTGKLIF	TRA
TCGA-AN-A0AM	Primary Tumor	HWUSI-EAS574_105813918:4:116:5053:10951	AE000661|TRAV38-1*01|Homo	23/23 nt	100	23	AF532854|TRAJ32*02|Homo	60/60 nt	100	60	CAFMPDGGATNKLIF	TRA
TCGA-AN-A0AM	Primary Tumor	HWUSI-EAS574_105813918:3:102:1670:5403	AE000659|TRAV9-2*01|Homo	29/29 nt	100	29	M94081|TRAJ20*01|Homo	51/51 nt	100	51	CALSVWDDYKLSF	TRA
TCGA-AN-A0AM	Primary Tumor	HWUSI-EAS574_105813918:3:64:14765:15200	AE000659|TRAV9-2*01|Homo	29/29 nt	100	29	M94081|TRAJ20*01|Homo	51/51 nt	100	51	CALSVWDDYKLSF	TRA
TCGA-AN-A0AM	Primary Tumor	HWUSI-EAS574_105813918:3:40:12243:1562	AE000659|TRAV6*01|Homo	44/44 nt	100	44	M94081|TRAJ10*01|Homo	48/48 nt	100	48	CRLSYLPLCSTDITGGGNKLTF	TRA
TCGA-AC-A6IW	Primary Tumor	HWI-ST485:144011564:C3DDBACXX:4:1214:7125:58683	AE000658|TRAV1-2*01|Homo	55/55 nt	100	55	M35622|TRAJ34*01|Homo	39/39 nt	100	39	CAVRDRGTDKLIF	TRA
TCGA-AC-A6IW	Primary Tumor	HWI-ST485:144011564:C3DDBACXX:4:2104:19415:71834	AE000659|TRAV12-2*01|Homo	64/64 nt	100	64	X02886|TRAJ22*01|Homo	29/29 nt	100	29	CAAHLSGSARQLTF	TRA
TCGA-AC-A6IW	Primary Tumor	HWI-ST485:144011564:C3DDBACXX:4:1103:4930:6704	AE000659|TRAV8-4*01|Homo	61/61 nt	100	61	M94081|TRAJ43*01|Homo	32/32 nt	100	32	CAVSEGWNNDMRF	TRA
TCGA-AC-A6IW	Primary Tumor	HWI-ST485:144011564:C3DDBACXX:3:2101:2605:83954	AE000659|TRAV12-3*01|Homo	59/59 nt	100	59	X02884|TRAJ3*01|Homo	39/39 nt	100	39	CNEGSSASKIIF	TRA
TCGA-AC-A6IW	Primary Tumor	HWI-ST485:144011564:C3DDBACXX:4:2310:16054:23000	AE000659|TRAV8-6*02|Homo	65/65 nt	100	65	M94081|TRAJ30*01|Homo	32/32 nt	100	32	CAVSLRDDKIIF	TRA
TCGA-AC-A6IW	Primary Tumor	HWI-ST485:144011564:C3DDBACXX:4:1105:6113:19808	X02850|TRAV8-6*01|Homo	62/62 nt	100	62	M16747|TRAJ6*01|Homo	34/34 nt	100	34	CAVARGSYIPTF	TRA
TCGA-AC-A6IW	Primary Tumor	HWI-ST485:144011564:C3DDBACXX:3:1315:11621:43501	X02850|TRAV8-6*01|Homo	66/66 nt	100	66	M94081|TRAJ54*01|Homo	33/33 nt	100	33	CAVSEQGAQKLVF	TRA
TCGA-AC-A6IW	Primary Tumor	HWI-ST485:144011564:C3DDBACXX:3:1212:11300:9012	AE000659|TRAV16*01|Homo	45/45 nt	100	45	M94081|TRAJ37*01|Homo	49/49 nt	100	49	CALQNSGNTGKLIF	TRA
TCGA-AC-A6IW	Primary Tumor	HWI-ST485:144011564:C3DDBACXX:3:2304:11748:38848	AE000660|TRAV19*01|Homo	76/76 nt	100	76	M94081|TRAJ54*01|Homo	20/20 nt	100	20	CALPFQGAQKLVF	TRA
TCGA-AC-A6IW	Primary Tumor	HWI-ST485:144011564:C3DDBACXX:3:1107:13947:12328	AE000660|TRAV36/DV7*01|Homo	62/62 nt	100	62	M94081|TRAJ45*01|Homo	34/34 nt	100	34	CAVEAEGGADGLTF	TRA
TCGA-AC-A6IW	Primary Tumor	HWI-ST485:144011564:C3DDBACXX:3:1315:11621:43501	X63455|TRAV8-4*05|Homo	21/21 nt	100	21	M94081|TRAJ54*01|Homo	55/55 nt	100	55	CAVSEQGAQKLVF	TRA
TCGA-AC-A6IW	Primary Tumor	HWI-ST485:144011564:C3DDBACXX:3:2115:3184:73090	AE000659|TRAV9-2*01|Homo	26/26 nt	100	26	M94081|TRAJ49*01|Homo	53/53 nt	100	53	CSEVTGNQFYF	TRA
TCGA-AC-A6IW	Primary Tumor	HWI-ST485:144011564:C3DDBACXX:4:1216:8848:3911	AE000661|TRAV38-2/DV8*01|Homo	24/24 nt	100	24	M94081|TRAJ43*01|Homo	53/53 nt	100	53	CAYRSFGNNNDMRF	TRA
TCGA-AC-A6IW	Primary Tumor	HWI-ST485:144011564:C3DDBACXX:4:1216:8848:3911	AE000661|TRAV38-2/DV8*01|Homo	30/30 nt	100	30	M94081|TRAJ43*01|Homo	53/53 nt	100	53	CAYRSFGNNNDMRF	TRA
TCGA-AC-A6IW	Primary Tumor	HWI-ST485:144011564:C3DDBACXX:3:1314:6974:84448	AE000660|TRAV30*01|Homo	43/44 nt	97.7273	43	M94081|TRAJ29*01|Homo	50/50 nt	100	50	CGTDDAEGNTPLVF	TRA
TCGA-AC-A6IW	Primary Tumor	HWI-ST485:144011564:C3DDBACXX:4:1207:6588:42786	AE000660|TRAV30*01|Homo	43/44 nt	97.7273	43	M94081|TRAJ29*01|Homo	50/50 nt	100	50	CGTDDAEGNTPLVF	TRA
TCGA-AC-A6IW	Primary Tumor	HWI-ST485:144011564:C3DDBACXX:3:2112:1818:46598	AE000660|TRAV27*01|Homo	42/42 nt	100	42	M94081|TRAJ27*01|Homo	52/52 nt	100	52	CAGAHYTNAGKSTF	TRA
TCGA-AC-A6IW	Primary Tumor	HWI-ST485:144011564:C3DDBACXX:4:2115:19741:16597	M35617|TRAV8-3*02|Homo	32/32 nt	100	32	M94081|TRAJ20*01|Homo	53/53 nt	100	53	CAVVFNDYKLSF	TRA
TCGA-AC-A6IW	Primary Tumor	HWI-ST485:144011564:C3DDBACXX:3:2205:1123:21142	M35617|TRAV8-3*02|Homo	32/32 nt	100	32	M94081|TRAJ20*01|Homo	53/53 nt	100	53	CAVVFNDYKLSF	TRA
TCGA-AC-A6IW	Primary Tumor	HWI-ST485:144011564:C3DDBACXX:3:1110:9864:76668	M35617|TRAV8-3*02|Homo	32/32 nt	100	32	M94081|TRAJ20*01|Homo	53/53 nt	100	53	CAVVFNDYKLSF	TRA
TCGA-AC-A6IW	Primary Tumor	HWI-ST485:144011564:C3DDBACXX:4:2305:15141:44406	AE000660|TRAV17*01|Homo	24/24 nt	100	24	M94081|TRAJ8*01|Homo	58/58 nt	100	58	CATDDNTGFQKLVF	TRA
TCGA-D8-A27I	Primary Tumor	HWI-ST729_115885580:1:2302:17210:110831	AE000659|TRAV6*01|Homo	54/54 nt	100	54	M94081|TRAJ26*01|Homo	41/41 nt	100	41	CALAHGQNFVF	TRA
TCGA-D8-A27I	Primary Tumor	HWI-ST729_115885580:1:1208:15414:194846	AE000661|TRAV41*01|Homo	53/55 nt	96.3636	53	M94081|TRAJ45*01|Homo	42/42 nt	100	42	CAVRSGGADGLTF	TRA
TCGA-D8-A27I	Primary Tumor	HWI-ST729_115885580:1:2102:5350:119811	AE000661|TRAV41*01|Homo	55/55 nt	100	55	M94081|TRAJ45*01|Homo	42/42 nt	100	42	CAVRSGGADGLTF	TRA
TCGA-D8-A27I	Primary Tumor	HWI-ST729_115885580:1:2108:1190:126792	AE000660|TRAV27*01|Homo	21/21 nt	100	21	M94081|TRAJ53*01|Homo	59/59 nt	100	59	CAGSGGSNYKLTF	TRA
TCGA-D8-A27I	Primary Tumor	HWI-ST729_115885580:1:2106:3591:36775	AE000660|TRAV27*01|Homo	46/47 nt	97.8723	46	AJ007774|TRAJ37*02|Homo	48/48 nt	100	48	CAGARGSSNTGKLIF	TRA
TCGA-A2-A1G6	Primary Tumor	HWI-ST495_114207489:1:1205:2796:184158	M17656|TRAV12-3*02|Homo	59/59 nt	100	59	X02884|TRAJ3*01|Homo	38/38 nt	100	38	CNERKYSSASKIIF	TRA
TCGA-A2-A1G6	Primary Tumor	HWI-ST495_114207489:1:1206:4485:120985	AE000660|TRAV17*01|Homo	48/48 nt	100	48	M14905|TRAJ31*01|Homo	50/50 nt	100	50	CATDSNNNARLMF	TRA
TCGA-A2-A1G6	Primary Tumor	HWI-ST495_114207489:3:1108:19101:47132	AE000659|TRAV5*01|Homo	34/34 nt	100	34	M94081|TRAJ7*01|Homo	57/57 nt	100	57	CAESHYGNNRLAF	TRA
TCGA-A8-A08S	Primary Tumor	HWUSI-EAS670_105809755:4:59:15404:6398	AE000659|TRAV13-2*01|Homo	32/32 nt	100	32	M35619|TRAJ44*01|Homo	56/56 nt	100	56	CAENLGGGTASKLTF	TRA
TCGA-E2-A15S	Primary Tumor	HWUSI-EAS677_109110875:6:45:18282:10136#0	AE000660|TRAV19*01|Homo	27/27 nt	100	27	M94081|TRAJ58*01|Homo	60/60 nt	100	60	CSHYLKETSGSRLTF	TRA
TCGA-AR-A24K	Primary Tumor	HWI-ST444_116124218:8:2106:15365:48143	AE000659|TRAV8-4*01|Homo	55/55 nt	100	55	M94081|TRAJ54*01|Homo	39/39 nt	100	39	CAVLLGAQKLVF	TRA
TCGA-AR-A24K	Primary Tumor	HWI-ST444_116124218:8:1105:15378:134614	AE000658|TRAV1-2*01|Homo	26/27 nt	96.2963	26	M16747|TRAJ6*01|Homo	61/61 nt	100	61	CAVASGGSYIPTF	TRA
TCGA-AR-A24K	Primary Tumor	HWI-ST444_116124218:8:2201:19943:99166	AE000658|TRAV1-2*01|Homo	26/27 nt	96.2963	26	M16747|TRAJ6*01|Homo	61/61 nt	100	61	CAVASGGSYIPTF	TRA
TCGA-E9-A2JT	Primary Tumor	HWI-ST664_119845270:5:2203:19629:74470	X04946|TRAV12-2*03|Homo	63/63 nt	100	63	AC023226|TRAJ13*02|Homo	33/34 nt	97.0588	33	CAVILISGGYQKVTF	TRA
TCGA-E9-A2JT	Primary Tumor	HWI-ST664_119845270:5:2101:13967:72235	AE000660|TRAV20*01|Homo	51/51 nt	100	51	M94081|TRAJ21*01|Homo	44/44 nt	100	44	CAASYNFNKFYF	TRA
TCGA-E9-A2JT	Primary Tumor	HWI-ST664_119845270:5:2105:1839:137562	AE000660|TRAV20*01|Homo	51/51 nt	100	51	M94081|TRAJ21*01|Homo	44/44 nt	100	44	CAASYNFNKFYF	TRA
TCGA-E9-A2JT	Primary Tumor	HWI-ST664_119845270:5:1105:2586:34622	AE000660|TRAV20*01|Homo	51/51 nt	100	51	M94081|TRAJ21*01|Homo	44/44 nt	100	44	CAASYNFNKFYF	TRA
TCGA-E9-A2JT	Primary Tumor	HWI-ST664_119845270:5:1306:15899:157961	AE000660|TRAV20*01|Homo	51/51 nt	100	51	M94081|TRAJ21*01|Homo	44/44 nt	100	44	CAASYNFNKFYF	TRA
TCGA-E9-A2JT	Primary Tumor	HWI-ST664_119845270:5:1105:4292:90688	AE000660|TRAV24*01|Homo	49/49 nt	100	49	M94081|TRAJ33*01|Homo	36/36 nt	100	36	CASYGITMDSNYQLIW	TRA
TCGA-E9-A2JT	Primary Tumor	HWI-ST664_119845270:5:2304:19042:116133	AE000661|TRAV41*01|Homo	72/72 nt	100	72	M94081|TRAJ58*01|Homo	27/27 nt	100	27	CAVIETSGSRLTF	TRA
TCGA-E9-A2JT	Primary Tumor	HWI-ST664_119845270:5:1301:7521:65472	X04954|TRAV13-1*02|Homo	35/35 nt	100	35	M94081|TRAJ47*01|Homo	52/52 nt	100	52	CAASRGYGNKLVF	TRA
TCGA-E9-A2JT	Primary Tumor	HWI-ST664_119845270:5:2105:9259:155976	K02777|TRAV8-4*06|Homo	30/30 nt	100	30	M94081|TRAJ43*01|Homo	47/47 nt	100	47	CAVSVDGQGNDMRF	TRA
TCGA-E9-A2JT	Primary Tumor	HWI-ST664_119845270:5:2306:4168:21068	K02777|TRAV8-4*06|Homo	30/30 nt	100	30	M94081|TRAJ43*01|Homo	47/47 nt	100	47	CAVSVDGQGNDMRF	TRA
TCGA-E9-A2JT	Primary Tumor	HWI-ST664_119845270:5:1202:20031:162809	X04946|TRAV12-2*03|Homo	41/41 nt	100	41	M94081|TRAJ33*01|Homo	53/53 nt	100	53	CRLADSNYQLIW	TRA
TCGA-E9-A2JT	Primary Tumor	HWI-ST664_119845270:5:1301:10595:29601	AE000660|TRAV20*01|Homo	48/51 nt	94.1176	48	M94081|TRAJ21*01|Homo	43/44 nt	97.7273	43	CAVSYNFNKFFF	TRA
TCGA-E9-A2JT	Primary Tumor	HWI-ST664_119845270:5:2308:3465:127825	AE000660|TRAV27*01|Homo	34/34 nt	100	34	M94081|TRAJ4*01|Homo	58/58 nt	100	58	CAGVASGGYNKLIF	TRA
TCGA-D8-A1XV	Primary Tumor	HWI-ST434_114203772:7:1206:1659:11212	AE000659|TRAV13-1*01|Homo	75/75 nt	100	75	X05773|TRAJ17*01|Homo	19/20 nt	95	19	CAASIRAAGNKPTF	TRA
TCGA-D8-A1XV	Primary Tumor	HWI-ST482_114177089:4:1201:7034:43281	AE000659|TRAV10*01|Homo	45/45 nt	100	45	X05773|TRAJ17*01|Homo	49/49 nt	100	49	CVVRTSAAGNKLTF	TRA
TCGA-PL-A8LY	Primary Tumor	HWI-ST485:146066425:C4U19ACXX:5:2212:13903:11032	AE000660|TRAV25*01|Homo	70/70 nt	100	70	M35620|TRAJ40*01|Homo	22/22 nt	100	22	CAGGEISGTYKYIF	TRA
TCGA-PL-A8LY	Primary Tumor	HWI-ST485:146066425:C4U19ACXX:5:1315:9063:91293	AE000660|TRAV17*01|Homo	37/37 nt	100	37	M94081|TRAJ43*01|Homo	50/50 nt	100	50	CATDFNNDMRF	TRA
TCGA-PL-A8LY	Primary Tumor	HWI-ST485:146066425:C4U19ACXX:5:2216:17391:68921	AE000658|TRAV1-1*01|Homo	38/38 nt	100	38	M94081|TRAJ37*01|Homo	55/55 nt	100	55	CLLLLRCEGGNTGKLIF	TRA
TCGA-PL-A8LY	Primary Tumor	HWI-ST485:146066425:C4U19ACXX:5:1106:4160:80007	AE000658|TRAV1-1*01|Homo	38/38 nt	100	38	M94081|TRAJ37*01|Homo	55/55 nt	100	55	CLLLLRCEGGNTGKLIF	TRA
TCGA-PL-A8LY	Primary Tumor	HWI-ST485:146066425:C4U19ACXX:5:1104:10687:27677	AE000661|TRAV39*01|Homo	19/19 nt	100	19	M14905|TRAJ31*01|Homo	48/48 nt	100	48	CAVDEGDARLMF	TRA
TCGA-A1-A0SO	Primary Tumor	HWI-EAS324_107014528:1:72:5296:3518	AE000659|TRAV8-3*01|Homo	50/50 nt	100	50	M94081|TRAJ47*01|Homo	43/43 nt	100	43	CAVGAPQGNKLVF	TRA
TCGA-A1-A0SO	Primary Tumor	HWI-EAS324_107014528:2:97:13097:13196	AE000661|TRAV41*01|Homo	43/44 nt	97.7273	43	AF532854|TRAJ32*02|Homo	48/48 nt	100	48	CASTGGGGATNKLIF	TRA
TCGA-BH-A0E9	Primary Tumor	HWUSI-EAS677_108852453:8:30:13745:7728#0	AE000658|TRAV1-1*01|Homo	75/75 nt	100	75	M14905|TRAJ31*01|Homo	22/22 nt	100	22	CAVRRNNARLMF	TRA
TCGA-BH-A0E9	Primary Tumor	HWUSI-EAS677_108852453:7:5:18100:7043#0	AE000660|TRAV29/DV5*01|Homo	72/72 nt	100	72	M94081|TRAJ43*01|Homo	24/24 nt	100	24	CAADDMRF	TRA
TCGA-BH-A0E9	Primary Tumor	HWUSI-EAS677_108852453:7:1:2768:11203#0	AE000658|TRAV1-1*01|Homo	28/28 nt	100	28	M94081|TRAJ9*01|Homo	57/57 nt	100	57	CAVRDTGGFKTIF	TRA
TCGA-A2-A1G1	Primary Tumor	HWI-ST495_114207489:2:1207:16195:153596	AE000659|TRAV12-1*01|Homo	44/45 nt	97.7778	44	M94081|TRAJ29*01|Homo	50/50 nt	100	50	CVVIPNSGNTPLVF	TRA
TCGA-E9-A1N4	Primary Tumor	HWI-ST434_114203775:7:2206:4436:46509	AE000658|TRAV1-2*01|Homo	73/73 nt	100	73	M94081|TRAJ39*01|Homo	24/24 nt	100	24	CAAYNAGNMLTF	TRA
TCGA-E9-A1N4	Primary Tumor	HWI-ST482_114177089:8:2203:6283:36794	AE000658|TRAV1-2*01|Homo	73/73 nt	100	73	M94081|TRAJ39*01|Homo	24/24 nt	100	24	CAAYNAGNMLTF	TRA
TCGA-E2-A1LA	Primary Tumor	HWI-ST514_114051246:7:1201:13327:50292	AE000659|TRAV13-2*01|Homo	51/51 nt	100	51	M94081|TRAJ42*01|Homo	44/44 nt	100	44	CAEKGHGGSQGNLIF	TRA
TCGA-E2-A1LA	Primary Tumor	HWI-ST514_114051246:6:2102:5166:165616	AE000660|TRAV19*01|Homo	48/48 nt	100	48	M94081|TRAJ58*01|Homo	47/48 nt	97.9167	47	CALSEAGTSGSRLTF	TRA
TCGA-E2-A1LA	Primary Tumor	HWI-ST514_114051246:7:1207:5023:180581	AE000659|TRAV8-2*01|Homo	28/28 nt	100	28	M94081|TRAJ10*01|Homo	60/60 nt	100	60	CVVSDVGITGGGNKLTF	TRA
TCGA-E2-A1LA	Primary Tumor	HWI-ST514_114051246:6:2107:17682:94421	AE000659|TRAV8-1*01|Homo	35/35 nt	100	35	M94081|TRAJ7*01|Homo	55/55 nt	100	55	CAVNSYGNNRLAF	TRA
TCGA-AC-A6IV	Primary Tumor	HWI-ST485:143997063:C3DDAACXX:3:2314:17928:51979	AE000660|TRAV19*01|Homo	73/73 nt	100	73	AC023226|TRAJ13*02|Homo	25/25 nt	100	25	CALRNSGGYQKVTF	TRA
TCGA-AC-A6IV	Primary Tumor	HWI-ST485:143997063:C3DDAACXX:3:2213:3125:39909	M97704|TRAV23/DV6*03|Homo	55/56 nt	98.2143	55	M94081|TRAJ37*01|Homo	39/39 nt	100	39	CAPLVGSGNTGKLIF	TRA
TCGA-AC-A6IV	Primary Tumor	HWI-ST485:143997063:C3DDAACXX:4:2108:19407:91970	M21626|TRAV14/DV4*01|Homo	34/34 nt	100	34	X05775|TRAJ15*01|Homo	51/51 nt	100	51	CAMRETGTALIF	TRA
TCGA-AC-A6IV	Primary Tumor	HWI-ST485:143997063:C3DDAACXX:4:2109:4971:30314	AE000660|TRAV26-1*01|Homo	39/39 nt	100	39	M94081|TRAJ11*01|Homo	56/56 nt	100	56	CCVLLHRQSLVNSGYSTLTF	TRA
TCGA-E2-A576	Primary Tumor	HWI-ST467:143152466:D2GWEACXX:1:2208:20718:86415	AE000658|TRAV1-1*01|Homo	63/64 nt	98.4375	63	M94081|TRAJ36*01|Homo	37/37 nt	100	37	CAVKKTGANNLFF	TRA
TCGA-A8-A094	Primary Tumor	HWUSI-EAS672_104390282:4:13:6200:14764	M17659|TRAV2*02|Homo	58/58 nt	100	58	M94081|TRAJ23*01|Homo	41/41 nt	100	41	CAVGNQGGKLIF	TRA
TCGA-A8-A094	Primary Tumor	HWUSI-EAS672_104390282:4:93:18908:5146	AE000661|TRAV38-2/DV8*01|Homo	59/59 nt	100	59	AC023226|TRAJ13*02|Homo	33/33 nt	100	33	CAYRSPRSSGGYQKVTF	TRA
TCGA-A8-A094	Primary Tumor	HWUSI-EAS672_104390282:4:5:8365:7294	AE000659|TRAV9-2*01|Homo	32/32 nt	100	32	M94081|TRAJ54*01|Homo	60/60 nt	100	60	CALRLIQGAQKLVF	TRA
TCGA-A8-A094	Primary Tumor	HWUSI-EAS672_104390282:4:108:4293:13440	AE000661|TRAV39*01|Homo	35/35 nt	100	35	M94081|TRAJ43*01|Homo	52/52 nt	100	52	CHLLLCRPTRRYNNNDMRF	TRA
TCGA-A8-A094	Primary Tumor	HWI-EAS292_104454631:1:49:9157:13078	AE000658|TRAV2*01|Homo	19/20 nt	95	19	M94081|TRAJ23*01|Homo	56/56 nt	100	56	CCAVGNQGGKLIF	TRA
TCGA-GM-A3XN	Primary Tumor	HWI-ST480:137308828:D1W7FACXX:1:1201:14635:59076	AE000659|TRAV14/DV4*02|Homo	80/82 nt	97.561	80	X05775|TRAJ15*01|Homo	22/22 nt	100	22	CAMEKAGTALIF	TRA
TCGA-GM-A3XN	Primary Tumor	HWI-ST480:137308828:D1W7FACXX:2:1206:3609:99833	AE000660|TRAV35*01|Homo	34/34 nt	100	34	M94081|TRAJ49*01|Homo	56/56 nt	100	56	CAGRANTGNQFYF	TRA
TCGA-GM-A3XN	Primary Tumor	HWI-ST480:137308828:D1W7FACXX:2:2215:9096:46569	M17656|TRAV12-3*02|Homo	27/27 nt	100	27	M35620|TRAJ40*01|Homo	57/57 nt	100	57	CAIASGTYKYIF	TRA
TCGA-GM-A3XN	Primary Tumor	HWI-ST480:137308828:D1W7FACXX:1:2208:18406:88738	M17665|TRAV8-4*07|Homo	20/20 nt	100	20	M94081|TRAJ21*01|Homo	55/55 nt	100	55	CSLDEYNFNKFYF	TRA
TCGA-GM-A3XN	Primary Tumor	HWI-ST480:137308828:D1W7FACXX:1:2313:5242:81529	AE000659|TRAV12-1*01|Homo	34/34 nt	100	34	M16747|TRAJ6*01|Homo	60/60 nt	100	60	CVVFTSGGSYIPTF	TRA
TCGA-A8-A07F	Primary Tumor	HWI-EAS231_104447898:2:32:5171:16518	X61070|TRAV36/DV7*02|Homo	62/63 nt	98.4127	62	AJ007774|TRAJ37*02|Homo	35/35 nt	100	35	CAVESNTGKLIF	TRA
TCGA-A8-A07F	Primary Tumor	HWI-EAS231_104447898:2:50:16846:13064	AE000658|TRAV1-2*01|Homo	27/27 nt	100	27	M94081|TRAJ28*01|Homo	62/62 nt	100	62	CLLPLCCNRMGSGAGSYQLTF	TRA
TCGA-A8-A07F	Primary Tumor	HWI-EAS231_104447898:3:28:9008:16707	AE000658|TRAV1-2*01|Homo	27/27 nt	100	27	M94081|TRAJ28*01|Homo	62/62 nt	100	62	CLLPLCCNRMGSGAGSYQLTF	TRA
TCGA-E9-A1N5	Primary Tumor	HWI-ST729_114206772:3:2106:11901:136290	AE000659|TRAV5*01|Homo	21/21 nt	100	21	M94081|TRAJ42*01|Homo	58/58 nt	100	58	CAESMEGGSQGNLIF	TRA
TCGA-E9-A1N5	Primary Tumor	HWI-ST729_114206772:2:2202:10379:99385	AE000659|TRAV5*01|Homo	21/21 nt	100	21	M94081|TRAJ42*01|Homo	58/58 nt	100	58	CAESMEGGSQGNLIF	TRA
TCGA-E9-A1N5	Primary Tumor	HWI-ST729_114206772:3:1102:6964:55947	AE000659|TRAV5*01|Homo	21/21 nt	100	21	M94081|TRAJ42*01|Homo	58/58 nt	100	58	CAESMEGGSQGNLIF	TRA
TCGA-E9-A1N5	Primary Tumor	HWI-ST729_114206772:1:2204:17422:181113	AE000659|TRAV5*01|Homo	21/21 nt	100	21	M94081|TRAJ42*01|Homo	58/58 nt	100	58	CAESMEGGSQGNLIF	TRA
TCGA-E9-A1N5	Primary Tumor	HWI-ST729_114206772:2:2108:17711:5534	AE000659|TRAV5*01|Homo	21/21 nt	100	21	M94081|TRAJ42*01|Homo	58/58 nt	100	58	CAESMEGGSQGNLIF	TRA
TCGA-AR-A250	Primary Tumor	HWI-ST144_115992511:5:2304:11757:101931	AE000659|TRAV13-2*01|Homo	79/79 nt	100	79	M94081|TRAJ48*01|Homo	19/19 nt	100	19	CLLLCRVSNFGNEKLTF	TRA
TCGA-AR-A250	Primary Tumor	HWI-ST144_115992511:5:1206:1902:128061	AE000659|TRAV12-2*01|Homo	19/19 nt	100	19	M94081|TRAJ52*01|Homo	69/69 nt	100	69	CAVTNAGGTSYGKLTF	TRA
TCGA-E2-A1IJ	Primary Tumor	HWI-ST729_115885580:2:1108:12189:110029	AE000660|TRAV26-2*01|Homo	67/68 nt	98.5294	67	M94081|TRAJ57*01|Homo	33/34 nt	97.0588	33	CILRALQGGSEKLVF	TRA
TCGA-E2-A1IJ	Primary Tumor	HWI-ST729_115885580:2:1305:8674:133446	AE000660|TRAV26-2*01|Homo	67/68 nt	98.5294	67	M94081|TRAJ57*01|Homo	33/34 nt	97.0588	33	CILRALQGGSEKLVF	TRA
TCGA-AC-A8OQ	Primary Tumor	HWI-ST118:146274275:C4VLKACXX:1:2316:14709:50722	X02850|TRAV8-6*01|Homo	58/58 nt	100	58	M94081|TRAJ52*01|Homo	38/38 nt	100	38	CAVSENAGGTSYGKLTF	TRA
TCGA-AC-A8OQ	Primary Tumor	HWI-ST118:146274275:C4VLKACXX:1:1311:9449:49053	AE000660|TRAV17*01|Homo	75/75 nt	100	75	M94081|TRAJ20*01|Homo	22/22 nt	100	22	CATEGDYKLSF	TRA
TCGA-AC-A8OQ	Primary Tumor	HWI-ST118:146274257:C4UKUACXX:7:1102:13179:22241	AE000660|TRAV17*01|Homo	52/52 nt	100	52	M94081|TRAJ52*01|Homo	43/43 nt	100	43	CATGVAGGTSYGKLTF	TRA
TCGA-AC-A8OQ	Primary Tumor	HWI-ST118:146274275:C4VLKACXX:1:1107:20664:71552	AE000660|TRAV35*01|Homo	70/70 nt	100	70	M35619|TRAJ44*01|Homo	24/24 nt	100	24	CAGPVTGTASKLTF	TRA
TCGA-AC-A8OQ	Primary Tumor	HWI-ST118:146274275:C4VLKACXX:1:1311:8922:43409	AE000660|TRAV35*01|Homo	70/70 nt	100	70	M35619|TRAJ44*01|Homo	24/24 nt	100	24	CAGPVTGTASKLTF	TRA
TCGA-AC-A8OQ	Primary Tumor	HWI-ST118:146274257:C4UKUACXX:7:2111:18389:12611	AE000659|TRAV13-1*01|Homo	30/30 nt	100	30	M94081|TRAJ54*01|Homo	55/56 nt	98.2143	55	CAASIGQGAQKLVF	TRA
TCGA-AC-A8OQ	Primary Tumor	HWI-ST118:146274257:C4UKUACXX:7:2108:10721:13959	AE000660|TRAV25*01|Homo	27/27 nt	100	27	M94081|TRAJ54*01|Homo	53/53 nt	100	53	CAGRIGGAQKLVF	TRA
TCGA-AC-A8OQ	Primary Tumor	HWI-ST118:146274257:C4UKUACXX:7:2108:8958:76424	AE000659|TRAV14/DV4*02|Homo	19/21 nt	90.4762	19	M94081|TRAJ43*01|Homo	38/40 nt	95	38	CDKNNDMRF	TRA
TCGA-AC-A8OQ	Primary Tumor	HWI-ST118:146274275:C4VLKACXX:1:1311:9449:49053	AE000660|TRAV17*01|Homo	32/32 nt	100	32	M94081|TRAJ20*01|Homo	50/50 nt	100	50	CATEGDYKLSF	TRA
TCGA-AC-A8OQ	Primary Tumor	HWI-ST118:146274257:C4UKUACXX:7:1215:18961:32368	AE000659|TRAV8-6*02|Homo	35/35 nt	100	35	M94081|TRAJ13*01|Homo	60/61 nt	98.3607	60	CAVTPNSGGYQKVTF	TRA
TCGA-A7-A3J0	Primary Tumor	HWI-ST480:137308828:D1W7FACXX:5:2114:3694:22330	AE000661|TRAV38-2/DV8*01|Homo	63/63 nt	100	63	M14905|TRAJ31*01|Homo	32/32 nt	100	32	CAYSRHNNARLMF	TRA
TCGA-BH-A1EX	Primary Tumor	HWI-ST514_114051223:5:2101:6461:45204	AE000659|TRAV8-3*01|Homo	39/39 nt	100	39	M94081|TRAJ49*01|Homo	56/56 nt	100	56	CAVGPTNTGNQFYF	TRA
TCGA-BH-A1EX	Primary Tumor	HWI-ST514_114051223:7:2104:12598:159181	AE000658|TRAV3*01|Homo	35/35 nt	100	35	M94081|TRAJ39*01|Homo	60/60 nt	100	60	CCEGYNNAGNMLTF	TRA
TCGA-BH-A1EX	Primary Tumor	HWI-ST514_114051223:5:1104:16584:75981	M17660|TRAV23/DV6*02|Homo	34/34 nt	100	34	X02886|TRAJ22*01|Homo	53/53 nt	100	53	CSKPEDSARQLTF	TRA
TCGA-S3-A6ZH	Primary Tumor	HWI-ST485:143300654:C2MNAACXX:5:1302:12955:42156	M17658|TRAV13-2*02|Homo	62/62 nt	100	62	M94081|TRAJ45*01|Homo	27/27 nt	100	27	CLLLCRDTLCPGGGADGLTF	TRA
TCGA-S3-A6ZH	Primary Tumor	HWI-ST485:143300654:C2MNAACXX:5:2316:16827:33724	AE000660|TRAV29/DV5*01|Homo	32/32 nt	100	32	M94081|TRAJ42*01|Homo	55/55 nt	100	55	CAASGRGSQGNLIF	TRA
TCGA-S3-A6ZH	Primary Tumor	HWI-ST485:143300654:C2MNAACXX:6:1108:7433:47513	AE000660|TRAV25*01|Homo	25/25 nt	100	25	M94081|TRAJ37*01|Homo	49/49 nt	100	49	CRNLLLTGKLIF	TRA
TCGA-S3-A6ZH	Primary Tumor	HWI-ST485:143300654:C2MNAACXX:6:2114:3759:73758	AE000660|TRAV25*01|Homo	25/25 nt	100	25	M94081|TRAJ37*01|Homo	49/49 nt	100	49	CRNLLLTGKLIF	TRA
TCGA-BH-A208	Primary Tumor	HWI-ST467_114519188:7:2201:19617:188160	AE000660|TRAV29/DV5*01|Homo	70/70 nt	100	70	X05775|TRAJ15*01|Homo	30/30 nt	100	30	CAASDQAGTALIF	TRA
TCGA-LD-A7W6	Primary Tumor	HWI-ST466:144041013:C3CV5ACXX:3:1211:11824:63016	AE000658|TRAV1-2*01|Homo	68/68 nt	100	68	M94081|TRAJ28*01|Homo	22/22 nt	100	22	CAPFRGAGSYQLTF	TRA
TCGA-C8-A26V	Primary Tumor	HWI-ST444_116124287:6:2205:9864:60718	AE000659|TRAV13-1*01|Homo	41/41 nt	100	41	M94081|TRAJ29*01|Homo	52/52 nt	100	52	CAAKGVGNTPLVF	TRA
TCGA-BH-A28O	Primary Tumor	HWI-ST480:137308828:D1W7FACXX:2:2211:2056:15235	AE000659|TRAV12-2*01|Homo	71/73 nt	97.2603	71	M94081|TRAJ15*02|Homo	22/22 nt	100	22	CAVNKGNQAGTALIF	TRA
TCGA-BH-A28O	Primary Tumor	HWI-ST480:137308828:D1W7FACXX:2:2104:9003:42121	AE000660|TRAV17*01|Homo	70/70 nt	100	70	X05775|TRAJ15*01|Homo	26/26 nt	100	26	CATGGNQAGTALIF	TRA
TCGA-A8-A06U	Primary Tumor	HWUSI-EAS1568_104864302:4:40:15637:1270	AE000659|TRAV12-2*01|Homo	54/54 nt	100	54	X02885|TRAJ12*01|Homo	42/42 nt	100	42	CAPGMDSSYKLIF	TRA
TCGA-A8-A06U	Primary Tumor	HWUSI-EAS227_104463089:2:65:1994:13516	AE000660|TRAV27*01|Homo	19/19 nt	100	19	M35620|TRAJ40*01|Homo	58/58 nt	100	58	CAGAKTSGTYKYIF	TRA
TCGA-A8-A08J	Primary Tumor	HWUSI-EAS687_104809201:6:17:18035:2763	AE000659|TRAV5*01|Homo	72/72 nt	100	72	M94081|TRAJ11*01|Homo	24/24 nt	100	24	CAEDRYSTLTF	TRA
TCGA-A8-A08J	Primary Tumor	HWUSI-EAS687_104809201:5:107:11739:13226	AE000660|TRAV35*01|Homo	97/98 nt	98.9796	97	X58763|TRAJ23*02|Homo	19/21 nt	90.4762	19	CSVWYNQEGQLIF	TRA
TCGA-A8-A08J	Primary Tumor	HWUSI-EAS687_104809201:4:11:13221:4409	AE000659|TRAV13-1*01|Homo	39/39 nt	100	39	M94081|TRAJ30*01|Homo	56/57 nt	98.2456	56	CAASMSRDDKIIF	TRA
TCGA-A8-A08J	Primary Tumor	HWUSI-EAS687_104809201:5:43:15135:7153	AE000659|TRAV13-1*01|Homo	39/39 nt	100	39	M94081|TRAJ30*01|Homo	56/57 nt	98.2456	56	CAASMSRDDKIIF	TRA
TCGA-A8-A08J	Primary Tumor	HWUSI-EAS687_104809201:4:55:11744:2016	AE000659|TRAV8-3*01|Homo	36/36 nt	100	36	M94081|TRAJ9*01|Homo	58/58 nt	100	58	CAVASNTGGFKTIF	TRA
TCGA-A7-A26I	Primary Tumor	HWI-ST514_126388021:4:1110:8051:69708	AE000658|TRAV1-2*01|Homo	48/48 nt	100	48	M94081|TRAJ9*01|Homo	50/50 nt	100	50	CAVTNTGGFKTIF	TRA
TCGA-A7-A26I	Primary Tumor	HWI-ST514_126388021:4:1114:13878:74466	AE000658|TRAV1-2*01|Homo	48/48 nt	100	48	M94081|TRAJ9*01|Homo	50/50 nt	100	50	CAVTNTGGFKTIF	TRA
TCGA-GM-A3XL	Primary Tumor	HWI-ST485:137341042:D1WPGACXX:6:1307:10749:22009	AE000658|TRAV1-2*01|Homo	61/61 nt	100	61	M35620|TRAJ40*01|Homo	34/34 nt	100	34	CLLPLCCEGNTSGTYKYIF	TRA
TCGA-GM-A3XL	Primary Tumor	HWI-ST485:137341042:D1WPGACXX:6:1306:3441:69157	AE000661|TRAV38-2/DV8*01|Homo	38/39 nt	97.4359	38	M94081|TRAJ52*01|Homo	54/55 nt	98.1818	54	CAYQGRANAGGTSYGKLTF	TRA
TCGA-GM-A3XL	Primary Tumor	HWI-ST485:137341042:D1WPGACXX:6:1210:4447:98625	AE000658|TRAV4*01|Homo	28/28 nt	100	28	M35620|TRAJ40*01|Homo	54/54 nt	100	54	CLVVSAPGTYKYIF	TRA
TCGA-GM-A3XL	Primary Tumor	HWI-ST485:137341042:D1WPGACXX:5:2110:15343:12628	AE000660|TRAV25*01|Homo	47/48 nt	97.9167	47	AJ007774|TRAJ37*02|Homo	52/52 nt	100	52	CAGSSNTGKLIF	TRA
TCGA-GM-A3XL	Primary Tumor	HWI-ST485:137341042:D1WPGACXX:6:2101:5941:91764	AE000660|TRAV19*01|Homo	21/22 nt	95.4545	21	M94081|TRAJ37*01|Homo	57/57 nt	100	57	CALSGAGNTGKLIF	TRA
TCGA-A2-A0YT	Primary Tumor	HWUSI-EAS776_108256656:8:106:19097:14414	X04946|TRAV12-2*03|Homo	50/50 nt	100	50	M94081|TRAJ26*01|Homo	46/46 nt	100	46	CAVNHDYGQNFVF	TRA
TCGA-A2-A0YT	Primary Tumor	HWUSI-EAS776_108256656:7:54:15097:9154	X04946|TRAV12-2*03|Homo	50/50 nt	100	50	M94081|TRAJ26*01|Homo	46/46 nt	100	46	CAVNHDYGQNFVF	TRA
TCGA-A2-A0YT	Primary Tumor	HWUSI-EAS776_108256656:8:31:16366:6666	AE000660|TRAV19*01|Homo	68/68 nt	100	68	M35619|TRAJ44*01|Homo	29/29 nt	100	29	CALFTGTASKLTF	TRA
TCGA-A2-A0YT	Primary Tumor	HWUSI-EAS776_108256656:8:93:13041:7368	AE000660|TRAV19*01|Homo	30/30 nt	100	30	M94081|TRAJ48*01|Homo	62/62 nt	100	62	CALGSNFGNEKLTF	TRA
TCGA-A2-A3XX	Primary Tumor	HWI-ST466:137456800:C20VRACXX:2:2104:11005:84821	M12959|TRAV8-4*04|Homo	44/45 nt	97.7778	44	M94081|TRAJ54*01|Homo	51/51 nt	100	51	CAVSEPIQGAQKLVF	TRA
TCGA-EW-A1IZ	Primary Tumor	HWI-ST144_116246149:1:1204:11038:106833	X04954|TRAV13-1*02|Homo	76/76 nt	100	76	M35619|TRAJ44*01|Homo	22/22 nt	100	22	CAAYTGTASKLTF	TRA
TCGA-EW-A1IZ	Primary Tumor	HWI-ST144_116246149:1:2308:13143:179735	X04954|TRAV13-1*02|Homo	76/76 nt	100	76	M35619|TRAJ44*01|Homo	22/22 nt	100	22	CAAYTGTASKLTF	TRA
TCGA-EW-A1IZ	Primary Tumor	HWI-ST514_118237144:7:1205:11857:198463	X04954|TRAV13-1*02|Homo	76/76 nt	100	76	M35619|TRAJ44*01|Homo	22/22 nt	100	22	CAAYTGTASKLTF	TRA
TCGA-EW-A1IZ	Primary Tumor	HWI-ST514_118237144:7:2306:14279:40545	X04954|TRAV13-1*02|Homo	76/76 nt	100	76	M35619|TRAJ44*01|Homo	22/22 nt	100	22	CAAYTGTASKLTF	TRA
TCGA-EW-A1IZ	Primary Tumor	HWI-ST514_118237144:7:2106:19840:195420	L06882|TRAV9-2*04|Homo	21/22 nt	95.4545	21	M94081|TRAJ58*01|Homo	58/60 nt	96.6667	58	CCAVKETSGSRLAF	TRA
TCGA-EW-A1IZ	Primary Tumor	HWI-ST514_118237144:7:2201:21037:94354	AE000659|TRAV9-2*01|Homo	22/24 nt	91.6667	22	M94081|TRAJ58*01|Homo	60/60 nt	100	60	CSLKETSGSRLTF	TRA
TCGA-EW-A1IZ	Primary Tumor	HWI-ST514_118237144:7:2108:16313:195569	AE000659|TRAV9-2*01|Homo	25/25 nt	100	25	M94081|TRAJ58*01|Homo	60/60 nt	100	60	CALKETSGSRLTF	TRA
TCGA-EW-A1IZ	Primary Tumor	HWI-ST514_118237144:7:2107:6556:3419	AE000659|TRAV9-2*01|Homo	25/25 nt	100	25	M94081|TRAJ58*01|Homo	60/60 nt	100	60	CALKETSGSRLTF	TRA
TCGA-EW-A1IZ	Primary Tumor	HWI-ST514_118237144:7:1204:18313:107714	AE000659|TRAV9-2*01|Homo	25/25 nt	100	25	M94081|TRAJ58*01|Homo	60/60 nt	100	60	CALKETSGSRLTF	TRA
TCGA-EW-A1IZ	Primary Tumor	HWI-ST514_118237144:7:1208:5556:146844	AE000659|TRAV9-2*01|Homo	25/25 nt	100	25	M94081|TRAJ58*01|Homo	60/60 nt	100	60	CALKETSGSRLTF	TRA
TCGA-EW-A1IZ	Primary Tumor	HWI-ST514_118237144:7:1102:20746:79516	AE000659|TRAV9-2*01|Homo	25/25 nt	100	25	M94081|TRAJ58*01|Homo	60/60 nt	100	60	CALKETSGSRLTF	TRA
TCGA-EW-A1IZ	Primary Tumor	HWI-ST144_116246149:1:1202:5076:186709	AE000659|TRAV9-2*01|Homo	25/25 nt	100	25	M94081|TRAJ58*01|Homo	60/60 nt	100	60	CALKETSGSRLTF	TRA
TCGA-EW-A1IZ	Primary Tumor	HWI-ST514_118237144:7:1303:18695:131039	AE000659|TRAV9-2*01|Homo	25/25 nt	100	25	M94081|TRAJ58*01|Homo	60/60 nt	100	60	CALKETSGSRLTF	TRA
TCGA-EW-A1IZ	Primary Tumor	HWI-ST144_116246149:1:2108:18902:144664	AE000660|TRAV25*01|Homo	31/31 nt	100	31	M94081|TRAJ49*01|Homo	54/54 nt	100	54	CAGTYTGNQFYF	TRA
TCGA-EW-A1IZ	Primary Tumor	HWI-ST144_116246149:1:2108:18902:144664	AE000660|TRAV25*01|Homo	31/31 nt	100	31	M94081|TRAJ49*01|Homo	54/54 nt	100	54	CAGTYTGNQFYF	TRA
TCGA-EW-A1IZ	Primary Tumor	HWI-ST144_116246149:1:2204:10788:18420	M35617|TRAV8-3*02|Homo	38/38 nt	100	38	M94081|TRAJ47*01|Homo	55/57 nt	96.4912	55	CIGVMLLVGYGNKLVF	TRA
TCGA-EW-A1IZ	Primary Tumor	HWI-ST144_116246149:1:2205:2365:198635	M35617|TRAV8-3*02|Homo	38/38 nt	100	38	M94081|TRAJ47*01|Homo	56/57 nt	98.2456	56	CIGVMLLVGYGNKLVF	TRA
TCGA-EW-A1IZ	Primary Tumor	HWI-ST514_118237144:7:1106:5134:175992	AE000659|TRAV16*01|Homo	19/20 nt	95	19	M94081|TRAJ43*01|Homo	54/54 nt	100	54	CQRMYYCDNNNDMRF	TRA
TCGA-EW-A1IZ	Primary Tumor	HWI-ST514_118237144:7:1108:21019:198397	AE000660|TRAV27*01|Homo	19/19 nt	100	19	M94081|TRAJ33*01|Homo	56/56 nt	100	56	CRSHRKDSNYQLIW	TRA
TCGA-EW-A1IZ	Primary Tumor	HWI-ST514_118237144:7:1305:17478:185657	AE000660|TRAV27*01|Homo	19/19 nt	100	19	M94081|TRAJ33*01|Homo	56/56 nt	100	56	CRSHRKDSNYQLIW	TRA
TCGA-EW-A1IZ	Primary Tumor	HWI-ST514_118237144:7:2101:12462:112554	AE000660|TRAV27*01|Homo	19/19 nt	100	19	M94081|TRAJ33*01|Homo	56/56 nt	100	56	CRSHRKDSNYQLIW	TRA
TCGA-EW-A1IZ	Primary Tumor	HWI-ST514_118237144:7:2106:16782:84899	AE000660|TRAV27*01|Homo	19/19 nt	100	19	M94081|TRAJ33*01|Homo	56/56 nt	100	56	CRSHRKDSNYQLIW	TRA
TCGA-EW-A1IZ	Primary Tumor	HWI-ST144_116246149:1:1104:20086:161066	AE000659|TRAV13-1*01|Homo	42/42 nt	100	42	M94081|TRAJ27*01|Homo	59/59 nt	100	59	CAASNTNAGKSTF	TRA
TCGA-EW-A1IZ	Primary Tumor	HWI-ST144_116246149:1:2105:20322:107198	AE000659|TRAV13-1*01|Homo	42/42 nt	100	42	M94081|TRAJ27*01|Homo	59/59 nt	100	59	CAASNTNAGKSTF	TRA
TCGA-EW-A1IZ	Primary Tumor	HWI-ST144_116246149:1:2107:4705:139260	AE000659|TRAV13-1*01|Homo	42/42 nt	100	42	M94081|TRAJ27*01|Homo	59/59 nt	100	59	CAASNTNAGKSTF	TRA
TCGA-EW-A1IZ	Primary Tumor	HWI-ST514_118237144:7:1306:8825:191372	AE000659|TRAV13-1*01|Homo	40/42 nt	95.2381	40	M94081|TRAJ27*01|Homo	58/59 nt	98.3051	58	CAASNPNAGKSTF	TRA
TCGA-EW-A1IZ	Primary Tumor	HWI-ST514_118237144:7:2107:1836:117079	AE000659|TRAV13-1*01|Homo	42/42 nt	100	42	M94081|TRAJ27*01|Homo	58/59 nt	98.3051	58	CAASNTNAGKSTF	TRA
TCGA-EW-A1IZ	Primary Tumor	HWI-ST514_118237144:7:2207:11232:116433	AE000659|TRAV13-1*01|Homo	42/42 nt	100	42	M94081|TRAJ27*01|Homo	59/59 nt	100	59	CAASNTNAGKSTF	TRA
TCGA-A1-A0SQ	Primary Tumor	HWI-ST698_115556147:4:1105:4098:4108	AE000658|TRAV2*01|Homo	48/48 nt	100	48	AF532854|TRAJ32*02|Homo	49/49 nt	100	49	CGATNKLIF	TRA
TCGA-A1-A0SQ	Primary Tumor	HWI-ST698_115556147:4:1203:2677:182348	AE000658|TRAV2*01|Homo	48/48 nt	100	48	AF532854|TRAJ32*02|Homo	49/49 nt	100	49	CGATNKLIF	TRA
TCGA-A8-A08R	Primary Tumor	HWUSI-EAS670_105809755:6:57:3465:14110	M17657|TRAV12-1*02|Homo	67/67 nt	100	67	X58763|TRAJ23*02|Homo	26/27 nt	96.2963	26	CVGGFYNQGGKLIF	TRA
TCGA-A8-A08R	Primary Tumor	HWUSI-EAS670_105809755:5:92:6381:19135	AE000660|TRAV19*01|Homo	21/22 nt	95.4545	21	M94081|TRAJ39*01|Homo	57/57 nt	100	57	CALSDGYNAGNMLTF	TRA
TCGA-A8-A08R	Primary Tumor	HWUSI-EAS670_105809755:5:20:7053:1546	X61070|TRAV36/DV7*02|Homo	22/23 nt	95.6522	22	M94081|TRAJ37*01|Homo	57/57 nt	100	57	CCATGNTGKLIF	TRA
TCGA-A8-A08R	Primary Tumor	HWUSI-EAS670_105809755:6:76:13406:19471	AE000660|TRAV8-7*01|Homo	19/19 nt	100	19	M35622|TRAJ34*01|Homo	48/48 nt	100	48	CAVRAPADKLIF	TRA
TCGA-A8-A08R	Primary Tumor	HWUSI-EAS670_105809755:5:39:7290:13284	AE000660|TRAV19*01|Homo	20/20 nt	100	20	M94081|TRAJ23*01|Homo	57/57 nt	100	57	CSLGDNQGGKLIF	TRA
TCGA-A8-A08R	Primary Tumor	HWUSI-EAS670_105809755:6:42:6357:1332	M17657|TRAV12-1*02|Homo	29/29 nt	100	29	M16747|TRAJ6*01|Homo	46/50 nt	92	46	CVAGGGGSYIPTF	TRA
TCGA-E2-A14O	Primary Tumor	HWI-ST482_112773875:6:2208:6287:83536	AE000658|TRAV1-2*01|Homo	60/60 nt	100	60	M94081|TRAJ21*01|Homo	36/36 nt	100	36	CAVRDPFNKFYF	TRA
TCGA-E2-A14O	Primary Tumor	HWI-ST482_112773875:6:2106:17107:6205	M21626|TRAV14/DV4*01|Homo	36/36 nt	100	36	M94081|TRAJ9*01|Homo	57/57 nt	100	57	CAMTYTGGFKTIF	TRA
TCGA-AO-A0JA	Primary Tumor	HWUSI-EAS1568_105608791:5:9:19437:19478#0	AE000659|TRAV12-1*01|Homo	53/54 nt	98.1481	53	M94081|TRAJ13*01|Homo	42/42 nt	100	42	CVVRVGGYQKVTF	TRA
TCGA-AO-A0JA	Primary Tumor	HWUSI-EAS1568_105608791:5:4:2841:17705#0	AE000660|TRAV21*01|Homo	44/44 nt	100	44	AJ007774|TRAJ37*02|Homo	49/49 nt	100	49	CAARGSSNTGKLIF	TRA
TCGA-AO-A0JA	Primary Tumor	HWUSI-EAS1568_105608791:6:1:18713:12696#0	AE000658|TRAV3*01|Homo	26/26 nt	100	26	M94081|TRAJ8*01|Homo	51/52 nt	98.0769	51	CTSVLRVGFQKLVF	TRA
TCGA-GM-A2DK	Primary Tumor	HWI-ST489_118346118:4:2101:6107:108866	M27371|TRAV26-1*02|Homo	70/71 nt	98.5915	70	M94081|TRAJ30*01|Homo	26/26 nt	100	26	CCVLLHLHLNRDDKIIF	TRA
TCGA-GM-A2DK	Primary Tumor	HWI-ST489_118346118:4:2205:5171:102411	M27371|TRAV26-1*02|Homo	70/71 nt	98.5915	70	M94081|TRAJ30*01|Homo	26/26 nt	100	26	CCVLLHLHLNRDDKIIF	TRA
TCGA-GM-A2DK	Primary Tumor	HWI-ST489_118346118:4:2105:1811:142237	AE000658|TRAV1-1*01|Homo	25/25 nt	100	25	M94081|TRAJ32*01|Homo	63/64 nt	98.4375	63	CERFINYGGATNKLIF	TRA
TCGA-GM-A2DK	Primary Tumor	HWI-ST489_118346118:4:2201:9392:93019	AE000658|TRAV1-1*01|Homo	25/25 nt	100	25	M94081|TRAJ32*01|Homo	63/64 nt	98.4375	63	CERFINYGGATNKLIF	TRA
TCGA-GM-A2DK	Primary Tumor	HWI-ST489_118346118:4:2308:16108:125416	AE000658|TRAV1-1*01|Homo	25/25 nt	100	25	M94081|TRAJ32*01|Homo	62/64 nt	96.875	62	CERFINYGGATNKLIF	TRA
TCGA-E9-A1RB	Primary Tumor	HWI-ST729_116161636:2:1102:12406:62775	AE000658|TRAV3*01|Homo	54/54 nt	100	54	M16747|TRAJ6*01|Homo	42/42 nt	100	42	CAVRPPGGSYIPTF	TRA
TCGA-E9-A1RB	Primary Tumor	HWI-ST729_116161636:2:2306:20208:159841	AE000659|TRAV14/DV4*02|Homo	33/33 nt	100	33	M94081|TRAJ47*01|Homo	56/56 nt	100	56	CAMRGAFWEYGNKLVF	TRA
TCGA-E9-A1RB	Primary Tumor	HWI-ST729_116161636:2:1202:4697:192734	AE000659|TRAV14/DV4*02|Homo	33/33 nt	100	33	M94081|TRAJ47*01|Homo	56/56 nt	100	56	CAMRGAFWEYGNKLVF	TRA
TCGA-E9-A1RB	Primary Tumor	HWI-ST729_116161636:2:1108:16301:68888	M17657|TRAV12-1*02|Homo	21/21 nt	100	21	X02886|TRAJ22*01|Homo	58/58 nt	100	58	CVVNGSGSARQLTF	TRA
TCGA-E9-A2JS	Primary Tumor	HWI-ST718_118408391:7:2204:1163:160502	AE000661|TRAV38-2/DV8*01|Homo	33/34 nt	97.0588	33	M94081|TRAJ42*01|Homo	60/61 nt	98.3607	60	CAYRLVYGGSQGNLIF	TRA
TCGA-E9-A2JS	Primary Tumor	HWI-ST718_118408391:7:1202:7636:181672	AE000661|TRAV38-2/DV8*01|Homo	34/34 nt	100	34	M94081|TRAJ42*01|Homo	61/61 nt	100	61	CAYRLVYGGSQGNLIF	TRA
TCGA-AR-A254	Primary Tumor	HWI-ST144_115992511:5:2105:5575:101682	X58738|TRAV35*02|Homo	40/40 nt	100	40	M94081|TRAJ39*01|Homo	57/57 nt	100	57	CAVNNAGNMLTF	TRA
TCGA-AC-A4ZE	Primary Tumor	HWI-ST118:146274257:C4UKUACXX:8:2114:13910:99223	AE000659|TRAV8-3*01|Homo	29/29 nt	100	29	M94081|TRAJ10*01|Homo	28/28 nt	100	28	CAVDPILTGGGNKLTF	TRA
TCGA-AC-A4ZE	Primary Tumor	HWI-ST118:146274257:C4UKUACXX:8:2301:20210:41362	AE000660|TRAV27*01|Homo	33/33 nt	100	33	M94081|TRAJ48*01|Homo	55/55 nt	100	55	CAGPRFGNEKLTF	TRA
TCGA-AC-A4ZE	Primary Tumor	HWI-ST489:146478129:C5A8LACXX:8:1315:8519:86572	AE000660|TRAV27*01|Homo	33/33 nt	100	33	M94081|TRAJ48*01|Homo	55/55 nt	100	55	CAGPRFGNEKLTF	TRA
TCGA-AC-A4ZE	Primary Tumor	HWI-ST489:146478129:C5A8LACXX:8:1313:18457:15938	AE000659|TRAV14/DV4*02|Homo	42/42 nt	100	42	M94081|TRAJ23*01|Homo	49/49 nt	100	49	CAMRVIVMIYNQGGKLIF	TRA
TCGA-AC-A4ZE	Primary Tumor	HWI-ST489:146478129:C5A8LACXX:8:1313:18457:15938	AE000659|TRAV14/DV4*02|Homo	42/42 nt	100	42	M94081|TRAJ23*01|Homo	49/49 nt	100	49	CAMRVIVMIYNQGGKLIF	TRA
TCGA-A2-A3XZ	Primary Tumor	HWI-ST466:137456800:C20VRACXX:3:2304:16753:31276	M27371|TRAV26-1*02|Homo	75/75 nt	100	75	M94081|TRAJ38*01|Homo	23/23 nt	100	23	CIVRRNAGNNRKLIW	TRA
TCGA-A2-A3XZ	Primary Tumor	HWI-ST466:137456800:C20VRACXX:3:2103:7298:58204	AE000659|TRAV8-6*02|Homo	46/46 nt	100	46	M94081|TRAJ39*01|Homo	51/51 nt	100	51	CAVSGYNNAGNMLTF	TRA
TCGA-A2-A3XZ	Primary Tumor	HWI-ST466:137456800:C20VRACXX:4:1203:13400:61802	AE000659|TRAV9-2*01|Homo	34/34 nt	100	34	M94081|TRAJ29*01|Homo	60/60 nt	100	60	CALSDGNSGNTPLVF	TRA
TCGA-A2-A3XZ	Primary Tumor	HWI-ST466:137456800:C20VRACXX:4:1302:16279:48148	AE000659|TRAV9-2*01|Homo	34/34 nt	100	34	M94081|TRAJ29*01|Homo	60/60 nt	100	60	CALSDGNSGNTPLVF	TRA
TCGA-A2-A3XZ	Primary Tumor	HWI-ST466:137456800:C20VRACXX:4:2308:20074:14056	AE000659|TRAV16*01|Homo	44/44 nt	100	44	M94081|TRAJ26*01|Homo	57/57 nt	100	57	CALRDNYGQNFVF	TRA
TCGA-AC-A2QI	Primary Tumor	HWI-ST446:137378071:C1T0PACXX:5:1304:16017:90270	AE000659|TRAV16*01|Homo	19/20 nt	95	19	M94081|TRAJ43*01|Homo	53/54 nt	98.1481	53	CQRMYYCDNNNDMRF	TRA
TCGA-E2-A1B5	Primary Tumor	HWI-ST514_110553183:5:3:19897:129700	AE000658|TRAV1-2*01|Homo	54/54 nt	100	54	M94081|TRAJ9*01|Homo	46/46 nt	100	46	CAVNTGGFKTIF	TRA
TCGA-E2-A1B5	Primary Tumor	HWI-ST514_110553183:5:2:8902:186502	AE000658|TRAV2*01|Homo	58/58 nt	100	58	X05775|TRAJ15*01|Homo	38/40 nt	95	38	CAVEANQAGTALIF	TRA
TCGA-E2-A1B5	Primary Tumor	HWI-ST514_110553183:5:65:4698:30892	AE000659|TRAV5*01|Homo	56/56 nt	100	56	M16747|TRAJ6*01|Homo	32/32 nt	100	32	CAETLGGAGGSYIPTF	TRA
TCGA-E2-A1B5	Primary Tumor	HWI-ST514_110553183:5:3:20376:128910	AE000659|TRAV5*01|Homo	50/50 nt	100	50	M94081|TRAJ45*01|Homo	48/49 nt	97.9592	48	CAESMEGGADGLTF	TRA
TCGA-E2-A1B5	Primary Tumor	HWI-ST514_110553183:5:44:3771:165019	AE000659|TRAV8-1*01|Homo	57/57 nt	100	57	M16747|TRAJ6*01|Homo	38/38 nt	100	38	CAVAQGGSYIPTF	TRA
TCGA-E2-A1B5	Primary Tumor	HWI-ST514_110553183:5:5:2468:76447	AE000659|TRAV12-1*01|Homo	70/71 nt	98.5915	70	M35619|TRAJ44*01|Homo	23/23 nt	100	23	CVVNRGGTASKLTF	TRA
TCGA-E2-A1B5	Primary Tumor	HWI-ST514_110553183:5:65:5825:43075	AE000659|TRAV13-1*01|Homo	70/72 nt	97.2222	70	M94081|TRAJ48*01|Homo	22/23 nt	95.6522	22	CAASVGNFGNEKLTF	TRA
TCGA-E2-A1B5	Primary Tumor	HWI-ST514_110553183:5:7:11794:165465	AE000659|TRAV13-1*01|Homo	68/68 nt	100	68	M94081|TRAJ47*01|Homo	26/26 nt	100	26	CLLLCSRSMEYGNKLVF	TRA
TCGA-E2-A1B5	Primary Tumor	HWI-ST514_110553183:5:7:7501:148818	M81774|TRAV12-2*02|Homo	66/67 nt	98.5075	66	M94081|TRAJ37*01|Homo	32/32 nt	100	32	CAVGSGNTGKLIF	TRA
TCGA-E2-A1B5	Primary Tumor	HWI-ST514_110553183:5:48:5296:96039	AE000659|TRAV12-2*01|Homo	59/59 nt	100	59	M94081|TRAJ23*01|Homo	36/37 nt	97.2973	36	CAVFNQGGKLIF	TRA
TCGA-E2-A1B5	Primary Tumor	HWI-ST514_110553183:5:8:9452:115870	AE000659|TRAV9-2*01|Homo	69/69 nt	100	69	X02884|TRAJ3*01|Homo	26/26 nt	100	26	CALNPYSSASKIIF	TRA
TCGA-E2-A1B5	Primary Tumor	HWI-ST514_110553183:5:66:7762:82614	AE000659|TRAV8-6*02|Homo	53/53 nt	100	53	M94081|TRAJ42*01|Homo	34/34 nt	100	34	CAVRDRVRGSQGNLIF	TRA
TCGA-E2-A1B5	Primary Tumor	HWI-ST514_110553183:5:42:12474:132603	AE000659|TRAV8-6*02|Homo	50/50 nt	100	50	M94081|TRAJ50*01|Homo	49/49 nt	100	49	CAVSDKTSYDKVIF	TRA
TCGA-E2-A1B5	Primary Tumor	HWI-ST514_110553183:5:27:4071:157407	AE000659|TRAV16*01|Homo	66/66 nt	100	66	X05773|TRAJ17*01|Homo	23/24 nt	95.8333	23	CITLRTAAGNKLNF	TRA
TCGA-E2-A1B5	Primary Tumor	HWI-ST514_110553183:5:24:16588:40500	AE000660|TRAV17*01|Homo	54/54 nt	100	54	M94081|TRAJ47*01|Homo	40/40 nt	100	40	CFLLLCYSEEYGNKLVF	TRA
TCGA-E2-A1B5	Primary Tumor	HWI-ST514_110553183:5:63:20782:138408	AE000660|TRAV19*01|Homo	60/62 nt	96.7742	60	M94081|TRAJ52*01|Homo	34/34 nt	100	34	CALRAGGTSYGKLTF	TRA
TCGA-E2-A1B5	Primary Tumor	HWI-ST514_110553183:5:23:10512:88829	AE000660|TRAV21*01|Homo	68/68 nt	100	68	M94081|TRAJ41*01|Homo	25/25 nt	100	25	CAVEANSGYALNF	TRA
TCGA-E2-A1B5	Primary Tumor	HWI-ST514_110553183:5:44:4763:8347	AE000660|TRAV29/DV5*01|Homo	59/59 nt	100	59	M14905|TRAJ31*01|Homo	34/34 nt	100	34	CALPAWRLCSVLLCDGHARLMF	TRA
TCGA-E2-A1B5	Primary Tumor	HWI-ST514_110553183:5:3:13429:162291	AE000661|TRAV38-1*01|Homo	55/55 nt	100	55	M94081|TRAJ39*01|Homo	41/42 nt	97.619	41	CISVLTLIIMQATCSP	TRA
TCGA-E2-A1B5	Primary Tumor	HWI-ST514_110553183:5:1:14942:132806	AE000659|TRAV9-2*01|Homo	26/26 nt	100	26	M94081|TRAJ58*01|Homo	59/59 nt	100	59	CALSRETSGSRLTF	TRA
TCGA-E2-A1B5	Primary Tumor	HWI-ST514_110553183:5:48:4434:102361	AE000660|TRAV25*01|Homo	24/24 nt	100	24	M94081|TRAJ54*01|Homo	57/58 nt	98.2759	57	CAFQGAQKLVF	TRA
TCGA-E2-A1B5	Primary Tumor	HWI-ST514_110553183:5:1:7489:137972	AE000660|TRAV26-2*01|Homo	29/29 nt	100	29	M94081|TRAJ52*01|Homo	65/65 nt	100	65	CILRDLTAGGTSYGKLTF	TRA
TCGA-E2-A1B5	Primary Tumor	HWI-ST514_110553183:5:65:12754:122529	AE000659|TRAV8-2*01|Homo	21/21 nt	100	21	M94081|TRAJ49*01|Homo	54/54 nt	100	54	CVVSDRYTGNQFYF	TRA
TCGA-E2-A1B5	Primary Tumor	HWI-ST514_110553183:5:8:18403:119829	AE000659|TRAV8-2*01|Homo	21/21 nt	100	21	M94081|TRAJ49*01|Homo	54/54 nt	100	54	CVVSDRYTGNQFYF	TRA
TCGA-E2-A1B5	Primary Tumor	HWI-ST514_110553183:5:6:8731:70562	AE000660|TRAV20*01|Homo	35/35 nt	100	35	M94081|TRAJ47*01|Homo	55/55 nt	100	55	CAVQAAEYGNKLVF	TRA
TCGA-E2-A1B5	Primary Tumor	HWI-ST514_110553183:5:23:16272:48619	AE000661|TRAV41*01|Homo	39/39 nt	100	39	M94081|TRAJ42*01|Homo	56/56 nt	100	56	CRLHLCCQMGYGGSQGNLIF	TRA
TCGA-E2-A1B5	Primary Tumor	HWI-ST514_110553183:5:26:17724:147277	AE000661|TRAV41*01|Homo	39/39 nt	100	39	M94081|TRAJ42*01|Homo	56/56 nt	100	56	CRLHLCCQMGYGGSQGNLIF	TRA
TCGA-E2-A1B5	Primary Tumor	HWI-ST514_110553183:5:45:4081:87426	AE000661|TRAV41*01|Homo	36/36 nt	100	36	M94081|TRAJ42*01|Homo	56/56 nt	100	56	CRLHLCCQMGYGGSQGNLIF	TRA
TCGA-E2-A1B5	Primary Tumor	HWI-ST514_110553183:5:46:16670:9504	AE000661|TRAV38-2/DV8*01|Homo	48/48 nt	100	48	M94081|TRAJ42*01|Homo	51/51 nt	100	51	CAYRRYGGSQGNLIF	TRA
TCGA-E2-A1B5	Primary Tumor	HWI-ST514_110553183:5:67:2968:155729	AE000661|TRAV38-2/DV8*01|Homo	48/48 nt	100	48	M94081|TRAJ42*01|Homo	51/51 nt	100	51	CAYRRYGGSQGNLIF	TRA
TCGA-E2-A1B5	Primary Tumor	HWI-ST514_110553183:5:23:10512:88829	AE000660|TRAV21*01|Homo	30/31 nt	96.7742	30	M94081|TRAJ41*01|Homo	54/55 nt	98.1818	54	CAVEANSGYALNF	TRA
TCGA-E2-A1B5	Primary Tumor	HWI-ST514_110553183:5:21:12503:98679	AE000659|TRAV12-1*01|Homo	19/21 nt	90.4762	19	M94081|TRAJ38*01|Homo	57/57 nt	100	57	CVVTTGNNRKLIW	TRA
TCGA-E2-A1B5	Primary Tumor	HWI-ST514_110553183:5:6:4990:67950	AE000658|TRAV3*01|Homo	43/43 nt	100	43	M94081|TRAJ36*01|Homo	49/49 nt	100	49	CAVRDSGGGANNLFF	TRA
TCGA-E2-A1B5	Primary Tumor	HWI-ST514_110553183:5:6:7588:31425	AE000658|TRAV3*01|Homo	43/43 nt	100	43	M94081|TRAJ36*01|Homo	49/49 nt	100	49	CAVRDSGGGANNLFF	TRA
TCGA-E2-A1B5	Primary Tumor	HWI-ST514_110553183:5:6:13155:140177	AE000659|TRAV6*01|Homo	53/57 nt	92.9825	53	M35622|TRAJ34*01|Homo	39/39 nt	100	39	CALGVTDKLIF	TRA
TCGA-E2-A1B5	Primary Tumor	HWI-ST514_110553183:5:48:14612:187926	AE000658|TRAV1-1*01|Homo	24/25 nt	96	24	M94081|TRAJ27*01|Homo	58/58 nt	100	58	CAVRNTNAGKSTF	TRA
TCGA-E2-A1B5	Primary Tumor	HWI-ST514_110553183:5:21:8190:106256	AE000658|TRAV2*01|Homo	23/24 nt	95.8333	23	M94081|TRAJ26*01|Homo	58/59 nt	98.3051	58	CALEDNYGQNFVF	TRA
TCGA-E2-A1B5	Primary Tumor	HWI-ST514_110553183:5:7:1793:16245	AE000660|TRAV35*01|Homo	30/30 nt	100	30	M94081|TRAJ26*01|Homo	54/54 nt	100	54	CAVYYGQNFVF	TRA
TCGA-E2-A1B5	Primary Tumor	HWI-ST514_110553183:5:48:5296:96039	M81774|TRAV12-2*02|Homo	23/23 nt	100	23	M94081|TRAJ23*01|Homo	55/55 nt	100	55	CAVFNQGGKLIF	TRA
TCGA-E2-A1B5	Primary Tumor	HWI-ST514_110553183:5:63:21097:53832	AE000658|TRAV3*01|Homo	33/33 nt	100	33	X05773|TRAJ17*01|Homo	60/60 nt	100	60	CAVRGFKAAGNKLTF	TRA
TCGA-E2-A1B5	Primary Tumor	HWI-ST514_110553183:5:27:5242:102992	AE000658|TRAV2*01|Homo	28/28 nt	100	28	M94081|TRAJ10*01|Homo	58/58 nt	100	58	CAVVTGGGNKLTF	TRA
TCGA-E2-A1B5	Primary Tumor	HWI-ST514_110553183:5:26:10980:137112	AE000659|TRAV8-1*01|Homo	20/20 nt	100	20	M16747|TRAJ6*01|Homo	55/55 nt	100	55	CAVNTGGSYIPTF	TRA
TCGA-E2-A1B5	Primary Tumor	HWI-ST514_110553183:5:46:5949:186854	M12423|TRAV8-4*02|Homo	32/32 nt	100	32	M94081|TRAJ4*01|Homo	55/55 nt	100	55	CAVSDTGGYNKLIF	TRA
TCGA-E2-A1B5	Primary Tumor	HWI-ST514_110553183:5:64:3392:88053	AE000658|TRAV4*01|Homo	26/26 nt	100	26	X02884|TRAJ3*01|Homo	62/62 nt	100	62	CLVGDMGYSSASKIIF	TRA
TCGA-BH-A0HK	Primary Tumor	HWUSI-EAS1568_105896089:7:44:16048:7112	AE000659|TRAV9-2*01|Homo	46/46 nt	100	46	M94081|TRAJ23*01|Homo	51/51 nt	100	51	CALNHNQGGKLIF	TRA
TCGA-A2-A4RW	Primary Tumor	HWI-ST466:137456800:C20VRACXX:5:2203:13889:74136	AE000658|TRAV4*01|Homo	58/58 nt	100	58	M94081|TRAJ39*01|Homo	34/34 nt	100	34	CLVGDIYMNNAGNMLTF	TRA
TCGA-A2-A4RW	Primary Tumor	HWI-ST466:137456800:C20VRACXX:5:2213:8517:12725	L06882|TRAV9-2*04|Homo	50/52 nt	96.1538	50	AJ007774|TRAJ37*02|Homo	43/44 nt	97.7273	43	CAVSSNTVKLIF	TRA
TCGA-A2-A4RW	Primary Tumor	HWI-ST466:137456800:C20VRACXX:6:2201:6655:26498	AE000660|TRAV21*01|Homo	50/50 nt	100	50	M94081|TRAJ57*01|Homo	46/47 nt	97.8723	46	CAVSQGGSEKLVF	TRA
TCGA-A2-A4RW	Primary Tumor	HWI-ST466:137456800:C20VRACXX:6:1212:11484:40014	AE000660|TRAV22*01|Homo	69/69 nt	100	69	M94081|TRAJ15*02|Homo	23/23 nt	100	23	CAVVSRQAGTALIF	TRA
TCGA-A2-A4RW	Primary Tumor	HWI-ST466:137456800:C20VRACXX:6:2110:10812:83354	AE000661|TRAV38-1*01|Homo	78/78 nt	100	78	M94081|TRAJ18*01|Homo	19/19 nt	100	19	CAFTPDRGSTLGRLYF	TRA
TCGA-A2-A4RW	Primary Tumor	HWI-ST466:137456800:C20VRACXX:6:1209:11738:76152	M35617|TRAV8-3*02|Homo	40/40 nt	100	40	M94081|TRAJ39*01|Homo	58/58 nt	100	58	CAVPNNAGNMLTF	TRA
TCGA-A2-A4RW	Primary Tumor	HWI-ST466:137456800:C20VRACXX:6:1209:11738:76152	AE000659|TRAV8-3*01|Homo	20/20 nt	100	20	M94081|TRAJ39*01|Homo	59/59 nt	100	59	CAVPNNAGNMLTF	TRA
TCGA-E2-A1IH	Primary Tumor	HWI-ST718_119291404:6:2208:19682:95483	AE000659|TRAV8-3*01|Homo	76/77 nt	98.7013	76	M94081|TRAJ15*02|Homo	22/22 nt	100	22	CAVGAQAGTALIF	TRA
TCGA-E2-A1IH	Primary Tumor	HWI-ST474_116588997:1:2304:6941:66074	X04954|TRAV13-1*02|Homo	70/70 nt	100	70	M94081|TRAJ9*01|Homo	23/23 nt	100	23	CAASRQGGFKTIF	TRA
TCGA-E2-A1IH	Primary Tumor	HWI-ST474_116588997:1:2207:20616:152061	X04954|TRAV13-1*02|Homo	70/70 nt	100	70	M94081|TRAJ9*01|Homo	23/23 nt	100	23	CAASRQGGFKTIF	TRA
TCGA-E2-A1IH	Primary Tumor	HWI-ST474_116588997:1:2207:16286:191422	X04954|TRAV13-1*02|Homo	70/70 nt	100	70	M94081|TRAJ9*01|Homo	23/23 nt	100	23	CAASRQGGFKTIF	TRA
TCGA-E2-A1IH	Primary Tumor	HWI-ST474_116588997:1:2306:17234:106529	X04954|TRAV13-1*02|Homo	70/70 nt	100	70	M94081|TRAJ9*01|Homo	23/23 nt	100	23	CAASRQGGFKTIF	TRA
TCGA-E2-A1IH	Primary Tumor	HWI-ST474_116588997:1:1205:1592:40843	X04954|TRAV13-1*02|Homo	70/70 nt	100	70	M94081|TRAJ9*01|Homo	23/23 nt	100	23	CAASRQGGFKTIF	TRA
TCGA-E2-A1IH	Primary Tumor	HWI-ST474_116588997:1:1108:12083:34708	X04954|TRAV13-1*02|Homo	70/70 nt	100	70	M94081|TRAJ9*01|Homo	22/23 nt	95.6522	22	CAASRQGGFKTVF	TRA
TCGA-E2-A1IH	Primary Tumor	HWI-ST474_116588997:1:1104:13763:88836	X04954|TRAV13-1*02|Homo	70/70 nt	100	70	M94081|TRAJ9*01|Homo	23/23 nt	100	23	CAASRQGGFKTIF	TRA
TCGA-E2-A1IH	Primary Tumor	HWI-ST474_116588997:1:1205:1811:134224	X04954|TRAV13-1*02|Homo	70/70 nt	100	70	M94081|TRAJ9*01|Homo	23/23 nt	100	23	CAASRQGGFKTIF	TRA
TCGA-E2-A1IH	Primary Tumor	HWI-ST474_116588997:1:1106:6687:172526	AE000660|TRAV35*01|Homo	42/42 nt	100	42	M94081|TRAJ42*01|Homo	55/55 nt	100	55	CAGPNYGGSQGNLIF	TRA
TCGA-E2-A1IH	Primary Tumor	HWI-ST474_116588997:1:1204:6644:13691	AE000660|TRAV35*01|Homo	42/42 nt	100	42	M94081|TRAJ42*01|Homo	55/55 nt	100	55	CAGPNYGGSQGNLIF	TRA
TCGA-E2-A1IH	Primary Tumor	HWI-ST474_116588997:1:1205:8913:197389	AE000660|TRAV35*01|Homo	42/42 nt	100	42	M94081|TRAJ42*01|Homo	55/55 nt	100	55	CAGPNYGGSQGNLIF	TRA
TCGA-E2-A1IH	Primary Tumor	HWI-ST474_116588997:1:2305:19299:121898	AE000660|TRAV35*01|Homo	42/42 nt	100	42	M94081|TRAJ42*01|Homo	55/55 nt	100	55	CAGPNYGGSQGNLIF	TRA
TCGA-E2-A1IH	Primary Tumor	HWI-ST718_119291404:6:1207:7321:9914	M27371|TRAV26-1*02|Homo	19/19 nt	100	19	M94081|TRAJ26*01|Homo	57/57 nt	100	57	CIVGYNYGQNFVF	TRA
TCGA-E2-A1IH	Primary Tumor	HWI-ST718_119291404:6:2102:9622:168825	M27371|TRAV26-1*02|Homo	19/19 nt	100	19	M94081|TRAJ26*01|Homo	57/57 nt	100	57	CIVGYNYGQNFVF	TRA
TCGA-E2-A1IH	Primary Tumor	HWI-ST718_119291404:6:1104:1628:174380	M27371|TRAV26-1*02|Homo	19/19 nt	100	19	M94081|TRAJ26*01|Homo	57/57 nt	100	57	CIVGYNYGQNFVF	TRA
TCGA-E2-A1IH	Primary Tumor	HWI-ST718_119291404:6:1207:6561:152274	M17657|TRAV12-1*02|Homo	24/24 nt	100	24	M94081|TRAJ23*01|Homo	55/55 nt	100	55	CVVINQGGKLIF	TRA
TCGA-E2-A1IH	Primary Tumor	HWI-ST718_119291404:6:1307:16507:183527	AE000659|TRAV12-1*01|Homo	24/24 nt	100	24	M94081|TRAJ23*01|Homo	55/55 nt	100	55	CVVINQGGKLIF	TRA
TCGA-BH-A0HL	Primary Tumor	HWI-ST480_105950043:7:43:10375:127468	AE000660|TRAV29/DV5*01|Homo	57/57 nt	100	57	M94081|TRAJ43*01|Homo	40/40 nt	100	40	CSVLLCSNPNNNDMRF	TRA
TCGA-AO-A03O	Primary Tumor	HWUSI-EAS687_104809201:8:28:6268:4259	AE000659|TRAV9-2*01|Homo	34/34 nt	100	34	M94081|TRAJ53*01|Homo	60/60 nt	100	60	CQTQRCTSVLCCGGGSNYKLTF	TRA
TCGA-AO-A03O	Primary Tumor	HWUSI-EAS687_104809201:8:94:14821:19461	S81645|TRAV29/DV5*02|Homo	27/27 nt	100	27	M94081|TRAJ49*01|Homo	51/51 nt	100	51	CSVLLCSKPGNQFYF	TRA
TCGA-AO-A03O	Primary Tumor	HWUSI-EAS687_104809201:7:37:16664:9366	AE000660|TRAV26-1*01|Homo	38/38 nt	100	38	M94081|TRAJ41*01|Homo	59/59 nt	100	59	CTIASSESASNSGYALNF	TRA
TCGA-AN-A03Y	Primary Tumor	HWI-EAS97_105965145:4:58:4802:10775	AE000659|TRAV8-4*01|Homo	51/51 nt	100	51	X05773|TRAJ17*01|Homo	47/47 nt	100	47	CAVSEQAAGNKLTF	TRA
TCGA-AN-A03Y	Primary Tumor	HWUSI-EAS1543_104366236:7:87:5601:8929	M17656|TRAV12-3*02|Homo	55/55 nt	100	55	M94081|TRAJ50*01|Homo	48/48 nt	100	48	CAMKTSYDKVIF	TRA
TCGA-AN-A03Y	Primary Tumor	HWUSI-EAS1543_104366236:7:49:9243:5363	X02850|TRAV8-6*01|Homo	56/56 nt	100	56	M94081|TRAJ4*01|Homo	35/35 nt	100	35	CCDLKGGGYNKLIF	TRA
TCGA-AN-A03Y	Primary Tumor	HWUSI-EAS677_104366674:8:115:14877:11243	AE000660|TRAV26-1*01|Homo	71/71 nt	100	71	M94081|TRAJ53*01|Homo	21/21 nt	100	21	CIVISRGGSNYKLTF	TRA
TCGA-AN-A03Y	Primary Tumor	HWUSI-EAS677_104366674:8:58:4290:10331	AE000658|TRAV1-2*01|Homo	27/27 nt	100	27	M35620|TRAJ40*01|Homo	58/58 nt	100	58	CAVRDPTSGTYKYIF	TRA
TCGA-AN-A03Y	Primary Tumor	HWUSI-EAS677_104366674:8:21:18665:2117	M12423|TRAV8-4*02|Homo	44/47 nt	93.617	44	X05773|TRAJ17*01|Homo	47/47 nt	100	47	CAVSEQAAGNKLTF	TRA
TCGA-AN-A0XW	Primary Tumor	HWUSI-EAS683_108250387:8:89:1937:7433	AE000658|TRAV3*01|Homo	57/57 nt	100	57	M94081|TRAJ28*01|Homo	41/41 nt	100	41	CAVRAGAGSYQLTF	TRA
TCGA-AN-A0XW	Primary Tumor	HWUSI-EAS683_108250387:7:11:18623:10629	AE000659|TRAV12-3*01|Homo	77/78 nt	98.7179	77	M94081|TRAJ48*01|Homo	20/22 nt	90.9091	20	CNGGILNFGNEKLTF	TRA
TCGA-AN-A0XW	Primary Tumor	HWUSI-EAS683_108250387:8:46:11815:6713	AE000659|TRAV8-6*02|Homo	52/52 nt	100	52	M94081|TRAJ20*01|Homo	43/43 nt	100	43	CAGSSNDYKLSF	TRA
TCGA-AN-A0XW	Primary Tumor	HWUSI-EAS683_108250387:7:38:10702:20979	AE000660|TRAV17*01|Homo	68/68 nt	100	68	M94081|TRAJ57*01|Homo	34/34 nt	100	34	CATQGGSEKLVF	TRA
TCGA-AN-A0XW	Primary Tumor	HWUSI-EAS683_108250387:8:11:1480:13853	AE000660|TRAV26-2*01|Homo	51/51 nt	100	51	AJ007774|TRAJ37*02|Homo	46/46 nt	100	46	CILDSSNTGKLIF	TRA
TCGA-AN-A0XW	Primary Tumor	HWUSI-EAS683_108250387:8:72:15211:10700	AE000660|TRAV26-2*01|Homo	51/51 nt	100	51	AJ007774|TRAJ37*02|Homo	46/46 nt	100	46	CILDSSNTGKLIF	TRA
TCGA-AN-A0XW	Primary Tumor	HWUSI-EAS683_108250387:7:36:14235:21245	AE000661|TRAV38-1*01|Homo	75/75 nt	100	75	M94081|TRAJ49*01|Homo	22/22 nt	100	22	CAFMKRAGNQFYF	TRA
TCGA-AN-A0XW	Primary Tumor	HWUSI-EAS683_108250387:8:95:11469:16158	AE000660|TRAV29/DV5*01|Homo	49/49 nt	100	49	M94081|TRAJ45*01|Homo	51/51 nt	100	51	CAASGGGADGLTF	TRA
TCGA-AN-A0XW	Primary Tumor	HWUSI-EAS683_108250387:7:74:16413:2754	AE000659|TRAV10*01|Homo	36/36 nt	100	36	M94081|TRAJ42*01|Homo	59/59 nt	100	59	CVVGPNYGGSQGNLIF	TRA
TCGA-AN-A0XW	Primary Tumor	HWUSI-EAS683_108250387:8:17:15196:13337	X04954|TRAV13-1*02|Homo	28/28 nt	100	28	M35620|TRAJ40*01|Homo	61/61 nt	100	61	CLLLCSKCTTSGTYKYIF	TRA
TCGA-AN-A0XW	Primary Tumor	HWUSI-EAS683_108250387:8:22:18833:6295	AE000658|TRAV4*01|Homo	44/44 nt	100	44	M94081|TRAJ28*01|Homo	49/49 nt	100	49	CLVGVSLYSGAGSYQLTF	TRA
TCGA-AN-A0XW	Primary Tumor	HWUSI-EAS683_108250387:7:1:2858:3118	AE000658|TRAV4*01|Homo	44/44 nt	100	44	M94081|TRAJ28*01|Homo	49/49 nt	100	49	CLVGVSLYSGAGSYQLTF	TRA
TCGA-AN-A0XW	Primary Tumor	HWUSI-EAS683_108250387:8:13:14582:11089	M21624|TRAV14/DV4*03|Homo	41/41 nt	100	41	M94081|TRAJ28*01|Homo	57/57 nt	100	57	CISHSGAGSYQLTF	TRA
TCGA-A7-A6VY	Primary Tumor	HWI-ST485:143997063:C3DDAACXX:1:1213:18113:61146	AE000659|TRAV8-3*01|Homo	50/50 nt	100	50	M94081|TRAJ20*01|Homo	46/46 nt	100	46	CAVGWHDYKLSF	TRA
TCGA-A7-A6VY	Primary Tumor	HWI-ST485:143997063:C3DDAACXX:1:2216:14017:68759	AE000661|TRAV38-2/DV8*01|Homo	40/40 nt	100	40	M94081|TRAJ57*01|Homo	57/57 nt	100	57	CAAQGGSEKLVF	TRA
TCGA-AN-A0FX	Primary Tumor	HWUSI-EAS635_105478298:2:3:18628:18866	AE000660|TRAV26-1*01|Homo	19/19 nt	100	19	M94081|TRAJ43*01|Homo	52/53 nt	98.1132	52	CIVRVANNPTNNNDMRF	TRA
TCGA-AN-A0FX	Primary Tumor	HWUSI-EAS635_105478298:2:41:18522:16404	AE000659|TRAV5*01|Homo	40/40 nt	100	40	AJ007774|TRAJ37*02|Homo	57/57 nt	100	57	CPSSNTGKLIF	TRA
TCGA-AN-A0FX	Primary Tumor	HWUSI-EAS635_105478298:1:13:9310:7356	AE000660|TRAV30*01|Homo	25/25 nt	100	25	M94081|TRAJ30*01|Homo	50/50 nt	100	50	CGTEIGIDDKIIF	TRA
TCGA-BH-A0HY	Primary Tumor	HWUSI-EAS667_105704096:6:70:6047:11362	AE000659|TRAV8-3*01|Homo	75/76 nt	98.6842	75	M94081|TRAJ45*01|Homo	20/20 nt	100	20	CAVGASGGGADGLTF	TRA
TCGA-BH-A0HY	Primary Tumor	HWUSI-EAS667_105704096:6:23:8455:13199	M17656|TRAV12-3*02|Homo	48/48 nt	100	48	X05773|TRAJ17*01|Homo	47/47 nt	100	47	CAIFMIKAAGNKLTF	TRA
[truncated: 2,108 more rows]
